# Supplementary material for: A proteomic study on the protective effect of kaempferol pretreatment against deoxynivalenol-induced intestinal barrier dysfunction in a Caco-2 cell model
Source: Royal Society of Chemistry journal article supplement (doi:10.1039/d0fo01579b), 2020-01-01
Supplement: d0fo01579b1.xlsx [file d0fo01579b1.xlsx]

## Sheet: KAM Vs control
Gene	Accession	Description	Unique peptides	MEAN B	MEAN A	P-VALUE	Q-VALUE	FOLD CHANGE	LOG_FOLDCHANGE
KRT18	P05783	sp|P05783|K1C18_HUMAN Keratin, type I cytoskeletal 18 OS=Homo sapiens OX=9606 GN=KRT18 PE=1 SV=2	23	0.00462048	0.00343884	1.16984e-05	0.00135352	1.34362	0.426122
H3F3A	P84243	sp|P84243|H33_HUMAN Histone H3.3 OS=Homo sapiens OX=9606 GN=H3F3A PE=1 SV=2	1	0.000123939	0.00274902	1.04472e-06	0.00102902	0.0450847	-4.47122
MDH2	P40926	sp|P40926|MDHM_HUMAN Malate dehydrogenase, mitochondrial OS=Homo sapiens OX=9606 GN=MDH2 PE=1 SV=3	19	0.00416167	0.00507196	0.000246993	0.00448863	0.820526	-0.285379
LGALS3	P17931	sp|P17931|LEG3_HUMAN Galectin-3 OS=Homo sapiens OX=9606 GN=LGALS3 PE=1 SV=5	12	0.0046212	0.00283736	0.0356697	0.0591757	1.6287	0.703719
RPLP1	P05386	sp|P05386|RLA1_HUMAN 60S acidic ribosomal protein P1 OS=Homo sapiens OX=9606 GN=RPLP1 PE=1 SV=1	3	0.00210473	0.00295391	0.0357238	0.0592316	0.712522	-0.488993
HIST1H3A	P68431	sp|P68431|H31_HUMAN Histone H3.1 OS=Homo sapiens OX=9606 GN=HIST1H3A PE=1 SV=2;sp|Q16695|H31T_HUMAN Histone H3.1t OS=Homo sapiens OX=9606 GN=HIST3H3 PE=1 SV=3	1	0.000124513	0.00280099	0.0010805	0.00839193	0.0444534	-4.49156
ATP5F1D	P30049	sp|P30049|ATPD_HUMAN ATP synthase subunit delta, mitochondrial OS=Homo sapiens OX=9606 GN=ATP5F1D PE=1 SV=2	2	0.00213684	0.00262177	0.000796085	0.00737858	0.815038	-0.295061
HNRNPA2B1	P22626	sp|P22626|ROA2_HUMAN Heterogeneous nuclear ribonucleoproteins A2/B1 OS=Homo sapiens OX=9606 GN=HNRNPA2B1 PE=1 SV=2	19	0.00289001	0.0023212	0.00179832	0.0109228	1.24505	0.316205
CFL1	P23528	sp|P23528|COF1_HUMAN Cofilin-1 OS=Homo sapiens OX=9606 GN=CFL1 PE=1 SV=3	11	0.00246072	0.00193999	1.41849e-05	0.00137935	1.26842	0.343029
S100A10	P60903	sp|P60903|S10AA_HUMAN Protein S100-A10 OS=Homo sapiens OX=9606 GN=S100A10 PE=1 SV=2	4	0.0016874	0.0011603	0.00261079	0.0130785	1.45428	0.540305
GSTA2	P09210	sp|P09210|GSTA2_HUMAN Glutathione S-transferase A2 OS=Homo sapiens OX=9606 GN=GSTA2 PE=1 SV=4;sp|P08263|GSTA1_HUMAN Glutathione S-transferase A1 OS=Homo sapiens OX=9606 GN=GSTA1 PE=1 SV=3;sp|Q16772|GSTA3_HUMAN Glutathione S-transferase A3 OS=Homo sapiens O	12	0.00210702	0.00144799	0.00016655	0.00383566	1.45513	0.541151
SLC2A1	P11166	sp|P11166|GTR1_HUMAN Solute carrier family 2, facilitated glucose transporter member 1 OS=Homo sapiens OX=9606 GN=SLC2A1 PE=1 SV=2	8	0.00210413	0.00166752	0.000799114	0.00739005	1.26183	0.335519
HIGD1A	Q9Y241	sp|Q9Y241|HIG1A_HUMAN HIG1 domain family member 1A, mitochondrial OS=Homo sapiens OX=9606 GN=HIGD1A PE=1 SV=1	5	0.00166211	0.00206948	0.0203349	0.0412092	0.803153	-0.316252
RPLP0	P05388	sp|P05388|RLA0_HUMAN 60S acidic ribosomal protein P0 OS=Homo sapiens OX=9606 GN=RPLP0 PE=1 SV=1;sp|Q8NHW5|RLA0L_HUMAN 60S acidic ribosomal protein P0-like OS=Homo sapiens OX=9606 GN=RPLP0P6 PE=5 SV=1	10	0.00156364	0.00129079	0.00856963	0.0245467	1.21139	0.276662
DAD1	P61803	sp|P61803|DAD1_HUMAN Dolichyl-diphosphooligosaccharide--protein glycosyltransferase subunit DAD1 OS=Homo sapiens OX=9606 GN=DAD1 PE=1 SV=3	4	0.00117915	0.00160272	0.000233906	0.00439896	0.735716	-0.442779
H2AFY	O75367	sp|O75367|H2AY_HUMAN Core histone macro-H2A.1 OS=Homo sapiens OX=9606 GN=H2AFY PE=1 SV=4	15	0.00135836	0.00105986	0.000299504	0.00479494	1.28164	0.357989
PTMA	P06454	sp|P06454|PTMA_HUMAN Prothymosin alpha OS=Homo sapiens OX=9606 GN=PTMA PE=1 SV=2	4	0.00128423	0.00188714	0.00212927	0.011901	0.680515	-0.5553
ACAA1	P09110	sp|P09110|THIK_HUMAN 3-ketoacyl-CoA thiolase, peroxisomal OS=Homo sapiens OX=9606 GN=ACAA1 PE=1 SV=2	18	0.00150206	0.00104484	0.00165167	0.0104329	1.4376	0.52366
ATP5MF	P56134	sp|P56134|ATPK_HUMAN ATP synthase subunit f, mitochondrial OS=Homo sapiens OX=9606 GN=ATP5MF PE=1 SV=3	4	0.00056273	0.00107009	0.00805844	0.0237254	0.525873	-0.927214
COX6B1	P14854	sp|P14854|CX6B1_HUMAN Cytochrome c oxidase subunit 6B1 OS=Homo sapiens OX=9606 GN=COX6B1 PE=1 SV=2	8	0.0012514	0.00161498	0.00336465	0.0145121	0.774871	-0.367972
BANF1	O75531	sp|O75531|BAF_HUMAN Barrier-to-autointegration factor OS=Homo sapiens OX=9606 GN=BANF1 PE=1 SV=1	4	0.00115105	0.000886507	0.000904861	0.00776031	1.29841	0.376741
HMGB2	P26583	sp|P26583|HMGB2_HUMAN High mobility group protein B2 OS=Homo sapiens OX=9606 GN=HMGB2 PE=1 SV=2	5	0.00125337	0.000904465	0.000359139	0.00522683	1.38576	0.47068
CES1	P23141	sp|P23141|EST1_HUMAN Liver carboxylesterase 1 OS=Homo sapiens OX=9606 GN=CES1 PE=1 SV=2	27	0.00107457	0.00130534	0.000117624	0.00338742	0.823209	-0.28067
PGK1	P00558	sp|P00558|PGK1_HUMAN Phosphoglycerate kinase 1 OS=Homo sapiens OX=9606 GN=PGK1 PE=1 SV=3	23	0.0011744	0.000955588	0.000644863	0.00673255	1.22898	0.297461
SLC2A5	P22732	sp|P22732|GTR5_HUMAN Solute carrier family 2, facilitated glucose transporter member 5 OS=Homo sapiens OX=9606 GN=SLC2A5 PE=1 SV=1	10	0.00132336	0.00101808	0.00794299	0.0235471	1.29986	0.378359
CDC42	P60953	sp|P60953|CDC42_HUMAN Cell division control protein 42 homolog OS=Homo sapiens OX=9606 GN=CDC42 PE=1 SV=2	7	0.000976463	0.00123621	0.00129488	0.00911712	0.789883	-0.340289
CHCHD2	Q9Y6H1	sp|Q9Y6H1|CHCH2_HUMAN Coiled-coil-helix-coiled-coil-helix domain-containing protein 2 OS=Homo sapiens OX=9606 GN=CHCHD2 PE=1 SV=1;sp|Q5T1J5|CHCH9_HUMAN Putative coiled-coil-helix-coiled-coil-helix domain-containing protein CHCHD2P9, mitochondrial OS=Homo s	5	0.00133789	0.00184114	0.00133133	0.00923281	0.726662	-0.460643
UQCRB	P14927	sp|P14927|QCR7_HUMAN Cytochrome b-c1 complex subunit 7 OS=Homo sapiens OX=9606 GN=UQCRB PE=1 SV=2	7	0.00115635	0.000923117	0.000950305	0.00790341	1.25266	0.324996
ALDOA	P04075	sp|P04075|ALDOA_HUMAN Fructose-bisphosphate aldolase A OS=Homo sapiens OX=9606 GN=ALDOA PE=1 SV=2	17	0.00121844	0.000963283	8.93611e-05	0.00303908	1.26488	0.338999
SERPINH1	P50454	sp|P50454|SERPH_HUMAN Serpin H1 OS=Homo sapiens OX=9606 GN=SERPINH1 PE=1 SV=2	21	0.00113171	0.000869304	0.000109102	0.00329416	1.30185	0.380566
SLC25A1	P53007	sp|P53007|TXTP_HUMAN Tricarboxylate transport protein, mitochondrial OS=Homo sapiens OX=9606 GN=SLC25A1 PE=1 SV=2	10	0.00121164	0.000951503	1.29486e-05	0.0013619	1.27339	0.348677
TXN	P10599	sp|P10599|THIO_HUMAN Thioredoxin OS=Homo sapiens OX=9606 GN=TXN PE=1 SV=3	5	0.00100654	0.000811661	0.00332988	0.0144548	1.24009	0.31045
FN1	P02751	sp|P02751|FINC_HUMAN Fibronectin OS=Homo sapiens OX=9606 GN=FN1 PE=1 SV=4	64	0.00191813	0.000580557	6.32547e-06	0.00128405	3.30394	1.72419
DLD	P09622	sp|P09622|DLDH_HUMAN Dihydrolipoyl dehydrogenase, mitochondrial OS=Homo sapiens OX=9606 GN=DLD PE=1 SV=2	14	0.000820338	0.000995057	0.000125832	0.00346943	0.824413	-0.27856
SLC25A13	Q9UJS0	sp|Q9UJS0|CMC2_HUMAN Calcium-binding mitochondrial carrier protein Aralar2 OS=Homo sapiens OX=9606 GN=SLC25A13 PE=1 SV=2	24	0.000837725	0.000694769	0.000232356	0.00438792	1.20576	0.269943
RPS20	P60866	sp|P60866|RS20_HUMAN 40S ribosomal protein S20 OS=Homo sapiens OX=9606 GN=RPS20 PE=1 SV=1	4	0.000855342	0.000634141	0.00434303	0.0166044	1.34882	0.431699
METTL7B	Q6UX53	sp|Q6UX53|MET7B_HUMAN Methyltransferase-like protein 7B OS=Homo sapiens OX=9606 GN=METTL7B PE=1 SV=2	7	0.000792201	0.000635483	0.00176014	0.0107989	1.24661	0.318012
MIC13	Q5XKP0	sp|Q5XKP0|MIC13_HUMAN MICOS complex subunit MIC13 OS=Homo sapiens OX=9606 GN=MIC13 PE=1 SV=1	4	0.000472378	0.000658452	0.00164627	0.0104141	0.717406	-0.479138
NCL	P19338	sp|P19338|NUCL_HUMAN Nucleolin OS=Homo sapiens OX=9606 GN=NCL PE=1 SV=3	22	0.000799268	0.000642746	0.0059936	0.0201333	1.24352	0.314432
SFPQ	P23246	sp|P23246|SFPQ_HUMAN Splicing factor, proline- and glutamine-rich OS=Homo sapiens OX=9606 GN=SFPQ PE=1 SV=2	22	0.000701554	0.000554843	0.0125767	0.0305104	1.26442	0.338476
ERH	P84090	sp|P84090|ERH_HUMAN Enhancer of rudimentary homolog OS=Homo sapiens OX=9606 GN=ERH PE=1 SV=1	4	0.000908612	0.000594752	0.000152845	0.00371594	1.52772	0.611376
SET	Q01105	sp|Q01105|SET_HUMAN Protein SET OS=Homo sapiens OX=9606 GN=SET PE=1 SV=3;sp|P0DME0|SETLP_HUMAN Protein SETSIP OS=Homo sapiens OX=9606 GN=SETSIP PE=1 SV=1	6	0.000743243	0.000577983	0.00265807	0.0131819	1.28593	0.362809
RPL8	P62917	sp|P62917|RL8_HUMAN 60S ribosomal protein L8 OS=Homo sapiens OX=9606 GN=RPL8 PE=1 SV=2	6	0.000690621	0.000539733	0.000823643	0.00748101	1.27956	0.355647
HNRNPA3	P51991	sp|P51991|ROA3_HUMAN Heterogeneous nuclear ribonucleoprotein A3 OS=Homo sapiens OX=9606 GN=HNRNPA3 PE=1 SV=2	13	0.000818703	0.000578972	0.0139409	0.0322993	1.41406	0.499846
RPL23A	P62750	sp|P62750|RL23A_HUMAN 60S ribosomal protein L23a OS=Homo sapiens OX=9606 GN=RPL23A PE=1 SV=1	6	0.000745015	0.000491141	0.00222792	0.0121631	1.51691	0.601132
HNRNPH1	P31943	sp|P31943|HNRH1_HUMAN Heterogeneous nuclear ribonucleoprotein H OS=Homo sapiens OX=9606 GN=HNRNPH1 PE=1 SV=4	6	0.000792089	0.000525689	0.00424255	0.0163988	1.50676	0.591452
RPS9	P46781	sp|P46781|RS9_HUMAN 40S ribosomal protein S9 OS=Homo sapiens OX=9606 GN=RPS9 PE=1 SV=3	10	0.00072223	0.000565503	0.00375361	0.0153304	1.27715	0.352923
S100A1	P23297	sp|P23297|S10A1_HUMAN Protein S100-A1 OS=Homo sapiens OX=9606 GN=S100A1 PE=1 SV=2	3	0.000384072	0.000315157	0.0431595	0.0668741	1.21867	0.285308
TFRC	P02786	sp|P02786|TFR1_HUMAN Transferrin receptor protein 1 OS=Homo sapiens OX=9606 GN=TFRC PE=1 SV=2	29	0.000922646	0.000721653	0.0120812	0.0298182	1.27852	0.354473
HNRNPL	P14866	sp|P14866|HNRPL_HUMAN Heterogeneous nuclear ribonucleoprotein L OS=Homo sapiens OX=9606 GN=HNRNPL PE=1 SV=2	18	0.000811218	0.000634031	0.000109692	0.00330091	1.27946	0.355537
TOMM6	Q96B49	sp|Q96B49|TOM6_HUMAN Mitochondrial import receptor subunit TOM6 homolog OS=Homo sapiens OX=9606 GN=TOMM6 PE=1 SV=1	2	0.000458653	0.00104049	0.00296542	0.0138065	0.440803	-1.18179
HIBADH	P31937	sp|P31937|3HIDH_HUMAN 3-hydroxyisobutyrate dehydrogenase, mitochondrial OS=Homo sapiens OX=9606 GN=HIBADH PE=1 SV=2	13	0.00058441	0.000732672	0.00593187	0.0200126	0.797643	-0.326185
TPD52L2	O43399	sp|O43399|TPD54_HUMAN Tumor protein D54 OS=Homo sapiens OX=9606 GN=TPD52L2 PE=1 SV=2	11	0.000636771	0.000503013	0.0289112	0.0517395	1.26591	0.340178
HNRNPH3	P31942	sp|P31942|HNRH3_HUMAN Heterogeneous nuclear ribonucleoprotein H3 OS=Homo sapiens OX=9606 GN=HNRNPH3 PE=1 SV=2	8	0.000624361	0.000471401	0.00136687	0.00936025	1.32448	0.405424
HNRNPA0	Q13151	sp|Q13151|ROA0_HUMAN Heterogeneous nuclear ribonucleoprotein A0 OS=Homo sapiens OX=9606 GN=HNRNPA0 PE=1 SV=1	5	0.000823343	0.000481545	9.4532e-05	0.00311193	1.70979	0.773822
RPL36	Q9Y3U8	sp|Q9Y3U8|RL36_HUMAN 60S ribosomal protein L36 OS=Homo sapiens OX=9606 GN=RPL36 PE=1 SV=3	3	0.000682275	0.000547243	0.00156813	0.0101359	1.24675	0.318173
GDI2	P50395	sp|P50395|GDIB_HUMAN Rab GDP dissociation inhibitor beta OS=Homo sapiens OX=9606 GN=GDI2 PE=1 SV=2	15	0.000439211	0.000534015	0.000804826	0.00741152	0.822469	-0.281967
DECR1	Q16698	sp|Q16698|DECR_HUMAN 2,4-dienoyl-CoA reductase, mitochondrial OS=Homo sapiens OX=9606 GN=DECR1 PE=1 SV=1	17	0.000471764	0.000669848	0.000501926	0.0060652	0.704285	-0.505769
TOMM20	Q15388	sp|Q15388|TOM20_HUMAN Mitochondrial import receptor subunit TOM20 homolog OS=Homo sapiens OX=9606 GN=TOMM20 PE=1 SV=1	3	0.000615059	0.000501837	0.000920105	0.0078093	1.22562	0.293506
FH	P07954	sp|P07954|FUMH_HUMAN Fumarate hydratase, mitochondrial OS=Homo sapiens OX=9606 GN=FH PE=1 SV=3	17	0.000578216	0.00070702	0.0180973	0.0383074	0.817822	-0.290141
CYCS	P99999	sp|P99999|CYC_HUMAN Cytochrome c OS=Homo sapiens OX=9606 GN=CYCS PE=1 SV=2	5	0.000294173	0.000403073	0.000345397	0.0051277	0.729826	-0.454376
VAMP3	Q15836	sp|Q15836|VAMP3_HUMAN Vesicle-associated membrane protein 3 OS=Homo sapiens OX=9606 GN=VAMP3 PE=1 SV=3;sp|P63027|VAMP2_HUMAN Vesicle-associated membrane protein 2 OS=Homo sapiens OX=9606 GN=VAMP2 PE=1 SV=3	4	0.000380758	0.000497075	0.00119471	0.0087959	0.765996	-0.38459
RPL35A	P18077	sp|P18077|RL35A_HUMAN 60S ribosomal protein L35a OS=Homo sapiens OX=9606 GN=RPL35A PE=1 SV=2	5	0.000572693	0.000411803	0.00142305	0.00958592	1.3907	0.475808
NDUFA4	O00483	sp|O00483|NDUA4_HUMAN Cytochrome c oxidase subunit NDUFA4 OS=Homo sapiens OX=9606 GN=NDUFA4 PE=1 SV=1	4	0.000525564	0.000648207	0.0430457	0.0667612	0.810796	-0.302589
SRSF3	P84103	sp|P84103|SRSF3_HUMAN Serine/arginine-rich splicing factor 3 OS=Homo sapiens OX=9606 GN=SRSF3 PE=1 SV=1	7	0.00043999	0.000586172	0.0269261	0.049409	0.750615	-0.413855
NDRG1	Q92597	sp|Q92597|NDRG1_HUMAN Protein NDRG1 OS=Homo sapiens OX=9606 GN=NDRG1 PE=1 SV=1	9	0.000503872	0.000390666	0.00180304	0.0109379	1.28978	0.367124
ILF2	Q12905	sp|Q12905|ILF2_HUMAN Interleukin enhancer-binding factor 2 OS=Homo sapiens OX=9606 GN=ILF2 PE=1 SV=2	13	0.000506253	0.000356434	0.000767709	0.00726865	1.42033	0.506223
HNRNPU	Q00839	sp|Q00839|HNRPU_HUMAN Heterogeneous nuclear ribonucleoprotein U OS=Homo sapiens OX=9606 GN=HNRNPU PE=1 SV=6	25	0.00049144	0.000385379	0.0100402	0.0267087	1.27521	0.350737
RPS19	P39019	sp|P39019|RS19_HUMAN 40S ribosomal protein S19 OS=Homo sapiens OX=9606 GN=RPS19 PE=1 SV=2	10	0.000492046	0.000387207	0.0377706	0.0612977	1.27076	0.345687
UQCRH	P07919	sp|P07919|QCR6_HUMAN Cytochrome b-c1 complex subunit 6, mitochondrial OS=Homo sapiens OX=9606 GN=UQCRH PE=1 SV=2	4	0.000438047	0.000628237	0.00831282	0.0241355	0.697264	-0.520223
TST	Q16762	sp|Q16762|THTR_HUMAN Thiosulfate sulfurtransferase OS=Homo sapiens OX=9606 GN=TST PE=1 SV=4	11	0.000535079	0.000424523	0.0100113	0.026669	1.26042	0.333908
SRSF7	Q16629	sp|Q16629|SRSF7_HUMAN Serine/arginine-rich splicing factor 7 OS=Homo sapiens OX=9606 GN=SRSF7 PE=1 SV=1	3	0.000500447	0.000392813	0.000299624	0.00479555	1.27401	0.349374
RPS11	P62280	sp|P62280|RS11_HUMAN 40S ribosomal protein S11 OS=Homo sapiens OX=9606 GN=RPS11 PE=1 SV=3	11	0.000423913	0.000330171	0.01272	0.0307061	1.28392	0.360556
UQCR10	Q9UDW1	sp|Q9UDW1|QCR9_HUMAN Cytochrome b-c1 complex subunit 9 OS=Homo sapiens OX=9606 GN=UQCR10 PE=1 SV=3	2	0.000383374	0.000290617	0.000847067	0.00756489	1.31917	0.399632
RPL17	P18621	sp|P18621|RL17_HUMAN 60S ribosomal protein L17 OS=Homo sapiens OX=9606 GN=RPL17 PE=1 SV=3	5	0.000413205	0.000519178	0.000556398	0.00632208	0.795884	-0.329371
SELENOI	Q9C0D9	sp|Q9C0D9|EPT1_HUMAN Ethanolaminephosphotransferase 1 OS=Homo sapiens OX=9606 GN=SELENOI PE=1 SV=3	1	0.000348153	0.000426263	0.00982017	0.0264033	0.816757	-0.292021
TMEM14C	Q9P0S9	sp|Q9P0S9|TM14C_HUMAN Transmembrane protein 14C OS=Homo sapiens OX=9606 GN=TMEM14C PE=1 SV=1	3	5.56944e-05	0.000181835	0.0422661	0.0659818	0.306291	-1.70703
SLC3A2	P08195	sp|P08195|4F2_HUMAN 4F2 cell-surface antigen heavy chain OS=Homo sapiens OX=9606 GN=SLC3A2 PE=1 SV=3	17	0.000426466	0.000347297	0.00182284	0.011001	1.22796	0.296264
HSD17B2	P37059	sp|P37059|DHB2_HUMAN Estradiol 17-beta-dehydrogenase 2 OS=Homo sapiens OX=9606 GN=HSD17B2 PE=1 SV=1	11	0.00044231	0.000301118	0.0345834	0.0580411	1.46889	0.554728
RPL5	P46777	sp|P46777|RL5_HUMAN 60S ribosomal protein L5 OS=Homo sapiens OX=9606 GN=RPL5 PE=1 SV=3	9	0.000464717	0.000283408	0.00293818	0.0137542	1.63974	0.713471
MATR3	P43243	sp|P43243|MATR3_HUMAN Matrin-3 OS=Homo sapiens OX=9606 GN=MATR3 PE=1 SV=2	28	0.000336669	0.000279849	0.00950206	0.0259511	1.20304	0.266682
ILF3	Q12906	sp|Q12906|ILF3_HUMAN Interleukin enhancer-binding factor 3 OS=Homo sapiens OX=9606 GN=ILF3 PE=1 SV=3	19	0.000387374	0.000295448	0.000813763	0.00744476	1.31114	0.390825
RPS2	P15880	sp|P15880|RS2_HUMAN 40S ribosomal protein S2 OS=Homo sapiens OX=9606 GN=RPS2 PE=1 SV=2	7	0.000324314	0.00025434	0.0317369	0.0549388	1.27512	0.35063
ATP1B3	P54709	sp|P54709|AT1B3_HUMAN Sodium/potassium-transporting ATPase subunit beta-3 OS=Homo sapiens OX=9606 GN=ATP1B3 PE=1 SV=1	8	0.000373782	0.000289552	0.00443117	0.016781	1.2909	0.368374
SSR1	P43307	sp|P43307|SSRA_HUMAN Translocon-associated protein subunit alpha OS=Homo sapiens OX=9606 GN=SSR1 PE=1 SV=3	4	0.000409471	0.000300503	0.00135073	0.00929404	1.36262	0.446381
AHCY	P23526	sp|P23526|SAHH_HUMAN Adenosylhomocysteinase OS=Homo sapiens OX=9606 GN=AHCY PE=1 SV=4	13	0.000340714	0.000267611	0.0177075	0.0377753	1.27317	0.348426
FAU	P62861	sp|P62861|RS30_HUMAN 40S ribosomal protein S30 OS=Homo sapiens OX=9606 GN=FAU PE=1 SV=1	1	0.000350255	8.20741e-05	0.0322086	0.0554662	4.26754	2.09341
GPA33	Q99795	sp|Q99795|GPA33_HUMAN Cell surface A33 antigen OS=Homo sapiens OX=9606 GN=GPA33 PE=1 SV=1	10	0.000297997	0.000384955	0.0397109	0.0633538	0.774111	-0.369388
RPL9	P32969	sp|P32969|RL9_HUMAN 60S ribosomal protein L9 OS=Homo sapiens OX=9606 GN=RPL9 PE=1 SV=1	7	0.000376455	0.000250104	0.000784027	0.00733244	1.5052	0.589952
P4HA1	P13674	sp|P13674|P4HA1_HUMAN Prolyl 4-hydroxylase subunit alpha-1 OS=Homo sapiens OX=9606 GN=P4HA1 PE=1 SV=2	15	0.000373527	0.000460953	0.0142347	0.0326637	0.810338	-0.303405
EEF2	P13639	sp|P13639|EF2_HUMAN Elongation factor 2 OS=Homo sapiens OX=9606 GN=EEF2 PE=1 SV=4	28	0.000326152	0.000270512	0.00229655	0.0123384	1.20568	0.269852
RACK1	P63244	sp|P63244|RACK1_HUMAN Receptor of activated protein C kinase 1 OS=Homo sapiens OX=9606 GN=RACK1 PE=1 SV=3	18	0.000310665	0.000253974	0.00605761	0.0202574	1.22322	0.29068
TECR	Q9NZ01	sp|Q9NZ01|TECR_HUMAN Very-long-chain enoyl-CoA reductase OS=Homo sapiens OX=9606 GN=TECR PE=1 SV=1	9	0.000433228	0.000292033	0.0226094	0.044091	1.48349	0.568997
APMAP	Q9HDC9	sp|Q9HDC9|APMAP_HUMAN Adipocyte plasma membrane-associated protein OS=Homo sapiens OX=9606 GN=APMAP PE=1 SV=2	13	0.000347997	0.000207377	0.00130439	0.00914614	1.67809	0.746817
VTN	P04004	sp|P04004|VTNC_HUMAN Vitronectin OS=Homo sapiens OX=9606 GN=VTN PE=1 SV=1	9	0.000434503	0.000291304	3.43623e-05	0.00185178	1.49158	0.576838
TPP1	O14773	sp|O14773|TPP1_HUMAN Tripeptidyl-peptidase 1 OS=Homo sapiens OX=9606 GN=TPP1 PE=1 SV=2	8	0.000373901	0.000267207	0.00318589	0.0142094	1.39929	0.484698
HNRNPR	O43390	sp|O43390|HNRPR_HUMAN Heterogeneous nuclear ribonucleoprotein R OS=Homo sapiens OX=9606 GN=HNRNPR PE=1 SV=1	11	0.000325531	0.000261676	0.00174199	0.0107391	1.24403	0.315016
ACBD5	Q5T8D3	sp|Q5T8D3|ACBD5_HUMAN Acyl-CoA-binding domain-containing protein 5 OS=Homo sapiens OX=9606 GN=ACBD5 PE=1 SV=1	14	0.000427856	0.000276895	0.00582171	0.0197946	1.54519	0.627785
RPS15	P62841	sp|P62841|RS15_HUMAN 40S ribosomal protein S15 OS=Homo sapiens OX=9606 GN=RPS15 PE=1 SV=2	4	0.000284405	0.000228853	0.0029328	0.0137438	1.24274	0.313529
ORMDL1	Q9P0S3	sp|Q9P0S3|ORML1_HUMAN ORM1-like protein 1 OS=Homo sapiens OX=9606 GN=ORMDL1 PE=1 SV=1;sp|Q53FV1|ORML2_HUMAN ORM1-like protein 2 OS=Homo sapiens OX=9606 GN=ORMDL2 PE=1 SV=2	1	8.31072e-05	0.000589244	0.00861147	0.0246126	0.14104	-2.82582
U2AF2	P26368	sp|P26368|U2AF2_HUMAN Splicing factor U2AF 65 kDa subunit OS=Homo sapiens OX=9606 GN=U2AF2 PE=1 SV=4	10	0.000337967	0.000239795	0.000936315	0.00786029	1.4094	0.495081
PDIA5	Q14554	sp|Q14554|PDIA5_HUMAN Protein disulfide-isomerase A5 OS=Homo sapiens OX=9606 GN=PDIA5 PE=1 SV=1	18	0.000314973	0.000257902	0.0230941	0.0446933	1.22129	0.288407
MARCKSL1	P49006	sp|P49006|MRP_HUMAN MARCKS-related protein OS=Homo sapiens OX=9606 GN=MARCKSL1 PE=1 SV=2	2	0.000280959	0.000346395	0.00489209	0.0178216	0.811095	-0.302057
YBX1	P67809	sp|P67809|YBOX1_HUMAN Nuclease-sensitive element-binding protein 1 OS=Homo sapiens OX=9606 GN=YBX1 PE=1 SV=3	5	0.000288862	0.000217169	0.00441983	0.0167585	1.33013	0.411564
PGRMC2	O15173	sp|O15173|PGRC2_HUMAN Membrane-associated progesterone receptor component 2 OS=Homo sapiens OX=9606 GN=PGRMC2 PE=1 SV=1	8	0.000350516	0.000120968	2.11242e-05	0.00155525	2.8976	1.53486
DHX9	Q08211	sp|Q08211|DHX9_HUMAN ATP-dependent RNA helicase A OS=Homo sapiens OX=9606 GN=DHX9 PE=1 SV=4	33	0.000317751	0.000225954	2.44819e-05	0.00164927	1.40626	0.491867
APOE	P02649	sp|P02649|APOE_HUMAN Apolipoprotein E OS=Homo sapiens OX=9606 GN=APOE PE=1 SV=1	15	0.000494343	0.000392257	2.02451e-05	0.00153149	1.26025	0.333714
DYNLL2	Q96FJ2	sp|Q96FJ2|DYL2_HUMAN Dynein light chain 2, cytoplasmic OS=Homo sapiens OX=9606 GN=DYNLL2 PE=1 SV=1	2	0.000290454	0.000195403	0.0199373	0.0407118	1.48644	0.571862
HMGCL	P35914	sp|P35914|HMGCL_HUMAN Hydroxymethylglutaryl-CoA lyase, mitochondrial OS=Homo sapiens OX=9606 GN=HMGCL PE=1 SV=2	8	0.000278963	0.000338247	0.0145468	0.0331465	0.82473	-0.278006
HNRNPUL2	Q1KMD3	sp|Q1KMD3|HNRL2_HUMAN Heterogeneous nuclear ribonucleoprotein U-like protein 2 OS=Homo sapiens OX=9606 GN=HNRNPUL2 PE=1 SV=1	20	0.000320061	0.000256667	5.66754e-05	0.00245254	1.24699	0.318447
MDH1	P40925	sp|P40925|MDHC_HUMAN Malate dehydrogenase, cytoplasmic OS=Homo sapiens OX=9606 GN=MDH1 PE=1 SV=4	8	0.000339381	0.000231946	0.000106097	0.00325909	1.46319	0.549119
NDUFA3	O95167	sp|O95167|NDUA3_HUMAN NADH dehydrogenase [ubiquinone] 1 alpha subcomplex subunit 3 OS=Homo sapiens OX=9606 GN=NDUFA3 PE=1 SV=1	3	0.000324984	0.000248621	0.0145609	0.0331683	1.30714	0.386417
YWHAG	P61981	sp|P61981|1433G_HUMAN 14-3-3 protein gamma OS=Homo sapiens OX=9606 GN=YWHAG PE=1 SV=2	6	0.000283509	0.000236072	0.00832452	0.0241545	1.20095	0.264171
GNG5	P63218	sp|P63218|GBG5_HUMAN Guanine nucleotide-binding protein G(I)/G(S)/G(O) subunit gamma-5 OS=Homo sapiens OX=9606 GN=GNG5 PE=1 SV=3	3	0.000265487	0.00053069	0.0307923	0.0538657	0.500267	-0.999229
ANXA7	P20073	sp|P20073|ANXA7_HUMAN Annexin A7 OS=Homo sapiens OX=9606 GN=ANXA7 PE=1 SV=3	13	0.000227456	0.000282705	0.00229105	0.0123245	0.80457	-0.31371
RPL3	P39023	sp|P39023|RL3_HUMAN 60S ribosomal protein L3 OS=Homo sapiens OX=9606 GN=RPL3 PE=1 SV=2	13	0.000347488	0.000185398	0.000418266	0.00561232	1.87428	0.906339
ECI2	O75521	sp|O75521|ECI2_HUMAN Enoyl-CoA delta isomerase 2, mitochondrial OS=Homo sapiens OX=9606 GN=ECI2 PE=1 SV=4	12	0.000293564	0.00023238	0.0206183	0.0415591	1.26329	0.33719
MIF	P14174	sp|P14174|MIF_HUMAN Macrophage migration inhibitory factor OS=Homo sapiens OX=9606 GN=MIF PE=1 SV=4	2	0.000205667	0.000165513	0.00597542	0.0200979	1.2426	0.313364
TIMM13	Q9Y5L4	sp|Q9Y5L4|TIM13_HUMAN Mitochondrial import inner membrane translocase subunit Tim13 OS=Homo sapiens OX=9606 GN=TIMM13 PE=1 SV=1	4	0.00031324	0.000197283	0.000235447	0.00440984	1.58777	0.666998
MOGS	Q13724	sp|Q13724|MOGS_HUMAN Mannosyl-oligosaccharide glucosidase OS=Homo sapiens OX=9606 GN=MOGS PE=1 SV=5	23	0.000239134	0.000191596	0.0422591	0.0659748	1.24812	0.319753
CHDH	Q8NE62	sp|Q8NE62|CHDH_HUMAN Choline dehydrogenase, mitochondrial OS=Homo sapiens OX=9606 GN=CHDH PE=1 SV=2	17	0.000272143	0.000206422	0.0019519	0.011397	1.31838	0.398766
TMEM33	P57088	sp|P57088|TMM33_HUMAN Transmembrane protein 33 OS=Homo sapiens OX=9606 GN=TMEM33 PE=1 SV=2	6	0.000323119	0.000205986	6.21758e-05	0.00257175	1.56865	0.649524
EIF2S1	P05198	sp|P05198|IF2A_HUMAN Eukaryotic translation initiation factor 2 subunit 1 OS=Homo sapiens OX=9606 GN=EIF2S1 PE=1 SV=3	14	0.000239339	0.000191488	0.0111916	0.0285131	1.24989	0.321799
PDCD10	Q9BUL8	sp|Q9BUL8|PDC10_HUMAN Programmed cell death protein 10 OS=Homo sapiens OX=9606 GN=PDCD10 PE=1 SV=1	2	6.94014e-05	5.31101e-05	0.00146358	0.00974419	1.30675	0.385979
ALYREF	Q86V81	sp|Q86V81|THOC4_HUMAN THO complex subunit 4 OS=Homo sapiens OX=9606 GN=ALYREF PE=1 SV=3	9	0.00017596	0.000138251	0.00743017	0.0227245	1.27276	0.347964
GNA11	P29992	sp|P29992|GNA11_HUMAN Guanine nucleotide-binding protein subunit alpha-11 OS=Homo sapiens OX=9606 GN=GNA11 PE=1 SV=2	8	0.000284967	0.000201272	0.0121575	0.0299264	1.41583	0.501645
TSPO	P30536	sp|P30536|TSPO_HUMAN Translocator protein OS=Homo sapiens OX=9606 GN=TSPO PE=1 SV=3	3	0.000143893	0.000201634	0.028332	0.0510714	0.713633	-0.486746
POR	P16435	sp|P16435|NCPR_HUMAN NADPH--cytochrome P450 reductase OS=Homo sapiens OX=9606 GN=POR PE=1 SV=2	24	0.000208066	0.000172795	0.0184898	0.038835	1.20413	0.267986
PICALM	Q13492	sp|Q13492|PICAL_HUMAN Phosphatidylinositol-binding clathrin assembly protein OS=Homo sapiens OX=9606 GN=PICALM PE=1 SV=2	11	0.000146779	0.000178517	0.0284403	0.0511971	0.822215	-0.282412
PARP1	P09874	sp|P09874|PARP1_HUMAN Poly [ADP-ribose] polymerase 1 OS=Homo sapiens OX=9606 GN=PARP1 PE=1 SV=4	29	0.000203759	0.000164261	0.0396188	0.063257	1.24046	0.310871
TMBIM1	Q969X1	sp|Q969X1|LFG3_HUMAN Protein lifeguard 3 OS=Homo sapiens OX=9606 GN=TMBIM1 PE=1 SV=2	3	0.000264977	0.000217567	0.00426415	0.0164434	1.21791	0.284406
KDELR2	P33947	sp|P33947|ERD22_HUMAN ER lumen protein-retaining receptor 2 OS=Homo sapiens OX=9606 GN=KDELR2 PE=1 SV=1	5	0.000364483	0.000178948	0.000123197	0.00344388	2.0368	1.02631
CPT1A	P50416	sp|P50416|CPT1A_HUMAN Carnitine O-palmitoyltransferase 1, liver isoform OS=Homo sapiens OX=9606 GN=CPT1A PE=1 SV=2	19	0.000230573	0.00018208	0.0244367	0.0463147	1.26633	0.340655
MCU	Q8NE86	sp|Q8NE86|MCU_HUMAN Calcium uniporter protein, mitochondrial OS=Homo sapiens OX=9606 GN=MCU PE=1 SV=1	9	0.000194526	0.000136697	0.00096653	0.00795243	1.42304	0.508981
H2AFX	P16104	sp|P16104|H2AX_HUMAN Histone H2AX OS=Homo sapiens OX=9606 GN=H2AFX PE=1 SV=2	2	9.40573e-05	0.000438806	0.0026856	0.0132411	0.214349	-2.22197
TM9SF2	Q99805	sp|Q99805|TM9S2_HUMAN Transmembrane 9 superfamily member 2 OS=Homo sapiens OX=9606 GN=TM9SF2 PE=1 SV=1	7	0.000221686	0.000182508	0.0432781	0.0669916	1.21466	0.280557
RAB18	Q9NP72	sp|Q9NP72|RAB18_HUMAN Ras-related protein Rab-18 OS=Homo sapiens OX=9606 GN=RAB18 PE=1 SV=1	8	0.000216641	0.000158759	0.0298432	0.0527942	1.36459	0.44847
ATP5IF1	Q9UII2	sp|Q9UII2|ATIF1_HUMAN ATPase inhibitor, mitochondrial OS=Homo sapiens OX=9606 GN=ATP5IF1 PE=1 SV=1	2	1.7482e-05	0.000536043	1.2511e-05	0.00135914	0.032613	-4.93841
TRIM28	Q13263	sp|Q13263|TIF1B_HUMAN Transcription intermediary factor 1-beta OS=Homo sapiens OX=9606 GN=TRIM28 PE=1 SV=5	22	0.000194471	0.000145636	0.00395699	0.0157892	1.33532	0.41719
ANP32A	P39687	sp|P39687|AN32A_HUMAN Acidic leucine-rich nuclear phosphoprotein 32 family member A OS=Homo sapiens OX=9606 GN=ANP32A PE=1 SV=1	3	0.00025733	0.000153764	3.07779e-05	0.00178841	1.67353	0.742896
PCBP2	Q15366	sp|Q15366|PCBP2_HUMAN Poly(rC)-binding protein 2 OS=Homo sapiens OX=9606 GN=PCBP2 PE=1 SV=1;sp|P57721|PCBP3_HUMAN Poly(rC)-binding protein 3 OS=Homo sapiens OX=9606 GN=PCBP3 PE=2 SV=2	5	0.000205752	0.000157819	0.000284354	0.00471432	1.30372	0.382637
NME1	P15531	sp|P15531|NDKA_HUMAN Nucleoside diphosphate kinase A OS=Homo sapiens OX=9606 GN=NME1 PE=1 SV=1	2	0.000200785	0.0001457	0.0209401	0.041952	1.37807	0.462645
PLIN3	O60664	sp|O60664|PLIN3_HUMAN Perilipin-3 OS=Homo sapiens OX=9606 GN=PLIN3 PE=1 SV=3	12	0.000130889	0.000100532	0.00363097	0.0150432	1.30197	0.3807
EIF4A1	P60842	sp|P60842|IF4A1_HUMAN Eukaryotic initiation factor 4A-I OS=Homo sapiens OX=9606 GN=EIF4A1 PE=1 SV=1	6	0.000198642	0.000140448	0.000385222	0.00540464	1.41434	0.50013
UBE2V1	Q13404	sp|Q13404|UB2V1_HUMAN Ubiquitin-conjugating enzyme E2 variant 1 OS=Homo sapiens OX=9606 GN=UBE2V1 PE=1 SV=2	2	0.000182781	0.000149895	0.00103872	0.00823283	1.21939	0.286165
DEK	P35659	sp|P35659|DEK_HUMAN Protein DEK OS=Homo sapiens OX=9606 GN=DEK PE=1 SV=1	9	0.000183674	0.000138941	0.0159503	0.0352694	1.32196	0.402676
PTMS	P20962	sp|P20962|PTMS_HUMAN Parathymosin OS=Homo sapiens OX=9606 GN=PTMS PE=1 SV=2	1	0.000188504	0.000373713	0.0290118	0.0518545	0.504409	-0.987335
VKORC1	Q9BQB6	sp|Q9BQB6|VKOR1_HUMAN Vitamin K epoxide reductase complex subunit 1 OS=Homo sapiens OX=9606 GN=VKORC1 PE=1 SV=1	2	0.000132564	0.000205008	5.86515e-05	0.00249661	0.646627	-0.628994
ACTR2	P61160	sp|P61160|ARP2_HUMAN Actin-related protein 2 OS=Homo sapiens OX=9606 GN=ACTR2 PE=1 SV=1	7	0.000176916	0.000142662	0.00634596	0.0208027	1.2401	0.310462
CCT2	P78371	sp|P78371|TCPB_HUMAN T-complex protein 1 subunit beta OS=Homo sapiens OX=9606 GN=CCT2 PE=1 SV=4	17	0.000179432	0.000142534	0.00201378	0.0115779	1.25887	0.332131
SLC25A10	Q9UBX3	sp|Q9UBX3|DIC_HUMAN Mitochondrial dicarboxylate carrier OS=Homo sapiens OX=9606 GN=SLC25A10 PE=1 SV=2	10	0.000184441	0.000146391	0.00285271	0.0135865	1.25992	0.333334
LACTB2	Q53H82	sp|Q53H82|LACB2_HUMAN Endoribonuclease LACTB2 OS=Homo sapiens OX=9606 GN=LACTB2 PE=1 SV=2	9	0.000214338	0.000162087	0.0410654	0.0647611	1.32236	0.403116
SRSF6	Q13247	sp|Q13247|SRSF6_HUMAN Serine/arginine-rich splicing factor 6 OS=Homo sapiens OX=9606 GN=SRSF6 PE=1 SV=2	8	0.000207271	0.000139239	0.00676871	0.0215832	1.4886	0.573958
NDUFA8	P51970	sp|P51970|NDUA8_HUMAN NADH dehydrogenase [ubiquinone] 1 alpha subcomplex subunit 8 OS=Homo sapiens OX=9606 GN=NDUFA8 PE=1 SV=3	6	0.000156485	0.000120209	0.0255081	0.0476706	1.30177	0.380475
PNPT1	Q8TCS8	sp|Q8TCS8|PNPT1_HUMAN Polyribonucleotide nucleotidyltransferase 1, mitochondrial OS=Homo sapiens OX=9606 GN=PNPT1 PE=1 SV=2	24	0.000182901	0.000141651	0.00108696	0.00841596	1.29121	0.368724
RPS29	P62273	sp|P62273|RS29_HUMAN 40S ribosomal protein S29 OS=Homo sapiens OX=9606 GN=RPS29 PE=1 SV=2	2	0.000191669	0.000119017	2.95107e-05	0.00176357	1.61044	0.687456
ARPC4	P59998	sp|P59998|ARPC4_HUMAN Actin-related protein 2/3 complex subunit 4 OS=Homo sapiens OX=9606 GN=ARPC4 PE=1 SV=3	4	0.000177617	0.000101021	0.00807874	0.0237565	1.75822	0.814116
ANPEP	P15144	sp|P15144|AMPN_HUMAN Aminopeptidase N OS=Homo sapiens OX=9606 GN=ANPEP PE=1 SV=4	19	0.000210674	0.000116063	0.000349909	0.00516068	1.81517	0.860107
APOA1	P02647	sp|P02647|APOA1_HUMAN Apolipoprotein A-I OS=Homo sapiens OX=9606 GN=APOA1 PE=1 SV=1	8	0.000279991	0.000220198	0.0113232	0.0287114	1.27154	0.346582
CALU	O43852	sp|O43852|CALU_HUMAN Calumenin OS=Homo sapiens OX=9606 GN=CALU PE=1 SV=2	8	0.000216762	0.000166113	0.000149968	0.0036891	1.30491	0.383946
GOLT1B	Q9Y3E0	sp|Q9Y3E0|GOT1B_HUMAN Vesicle transport protein GOT1B OS=Homo sapiens OX=9606 GN=GOLT1B PE=1 SV=1	3	0.000134012	5.01684e-05	0.0424987	0.0662154	2.67125	1.41751
FBXO2	Q9UK22	sp|Q9UK22|FBX2_HUMAN F-box only protein 2 OS=Homo sapiens OX=9606 GN=FBXO2 PE=1 SV=2	7	0.000169495	0.000115117	0.000465234	0.00587817	1.47238	0.558151
ITGB1	P05556	sp|P05556|ITB1_HUMAN Integrin beta-1 OS=Homo sapiens OX=9606 GN=ITGB1 PE=1 SV=2	16	0.000154154	0.000203698	0.00885269	0.0249873	0.756774	-0.402065
GFPT1	Q06210	sp|Q06210|GFPT1_HUMAN Glutamine--fructose-6-phosphate aminotransferase [isomerizing] 1 OS=Homo sapiens OX=9606 GN=GFPT1 PE=1 SV=3	20	0.000158216	0.000120513	0.000875753	0.00766387	1.31285	0.392707
SCAMP2	O15127	sp|O15127|SCAM2_HUMAN Secretory carrier-associated membrane protein 2 OS=Homo sapiens OX=9606 GN=SCAMP2 PE=1 SV=2	2	0.000142128	9.28558e-05	7.75776e-05	0.00285573	1.53063	0.614125
RAB2A	P61019	sp|P61019|RAB2A_HUMAN Ras-related protein Rab-2A OS=Homo sapiens OX=9606 GN=RAB2A PE=1 SV=1	6	0.000163347	0.000121572	0.00700531	0.0220025	1.34362	0.426126
NDUFA12	Q9UI09	sp|Q9UI09|NDUAC_HUMAN NADH dehydrogenase [ubiquinone] 1 alpha subcomplex subunit 12 OS=Homo sapiens OX=9606 GN=NDUFA12 PE=1 SV=1	3	0.000197551	0.000112634	0.00427913	0.0164742	1.75391	0.810577
KRAS	P01116	sp|P01116|RASK_HUMAN GTPase KRas OS=Homo sapiens OX=9606 GN=KRAS PE=1 SV=1	2	0.000165147	0.000111991	0.000133957	0.00354402	1.47464	0.560364
DARS2	Q6PI48	sp|Q6PI48|SYDM_HUMAN Aspartate--tRNA ligase, mitochondrial OS=Homo sapiens OX=9606 GN=DARS2 PE=1 SV=1	17	0.00012065	0.000157578	0.00233551	0.0124354	0.765656	-0.385232
NDUFS8	O00217	sp|O00217|NDUS8_HUMAN NADH dehydrogenase [ubiquinone] iron-sulfur protein 8, mitochondrial OS=Homo sapiens OX=9606 GN=NDUFS8 PE=1 SV=1	3	0.000158666	0.000130713	0.00045282	0.00581096	1.21385	0.279591
RPS27	P42677	sp|P42677|RS27_HUMAN 40S ribosomal protein S27 OS=Homo sapiens OX=9606 GN=RPS27 PE=1 SV=3	1	0.000127946	8.3503e-05	0.0283973	0.0511472	1.53223	0.615637
NDUFS6	O75380	sp|O75380|NDUS6_HUMAN NADH dehydrogenase [ubiquinone] iron-sulfur protein 6, mitochondrial OS=Homo sapiens OX=9606 GN=NDUFS6 PE=1 SV=1	4	0.000172414	0.000129904	0.00397646	0.015832	1.32724	0.408433
ARPC3	O15145	sp|O15145|ARPC3_HUMAN Actin-related protein 2/3 complex subunit 3 OS=Homo sapiens OX=9606 GN=ARPC3 PE=1 SV=3	5	0.000163531	0.000111246	7.35397e-05	0.0027875	1.46999	0.555811
KPNB1	Q14974	sp|Q14974|IMB1_HUMAN Importin subunit beta-1 OS=Homo sapiens OX=9606 GN=KPNB1 PE=1 SV=2	19	0.000103111	8.55697e-05	0.038345	0.0619012	1.205	0.26903
ARF6	P62330	sp|P62330|ARF6_HUMAN ADP-ribosylation factor 6 OS=Homo sapiens OX=9606 GN=ARF6 PE=1 SV=2	4	0.000144895	9.38027e-05	0.000552315	0.00630352	1.54468	0.627304
EEF1B2	P24534	sp|P24534|EF1B_HUMAN Elongation factor 1-beta OS=Homo sapiens OX=9606 GN=EEF1B2 PE=1 SV=3	4	0.000139953	9.36645e-05	0.00106586	0.0083369	1.4942	0.579369
ERG28	Q9UKR5	sp|Q9UKR5|ERG28_HUMAN Probable ergosterol biosynthetic protein 28 OS=Homo sapiens OX=9606 GN=ERG28 PE=1 SV=1	3	8.46039e-05	0.000106674	0.0331403	0.0564923	0.793105	-0.334416
RER1	O15258	sp|O15258|RER1_HUMAN Protein RER1 OS=Homo sapiens OX=9606 GN=RER1 PE=1 SV=1	3	0.000158971	0.000101099	0.00256181	0.0129692	1.57244	0.653004
LAMTOR2	Q9Y2Q5	sp|Q9Y2Q5|LTOR2_HUMAN Ragulator complex protein LAMTOR2 OS=Homo sapiens OX=9606 GN=LAMTOR2 PE=1 SV=1	3	9.73944e-05	0.00013428	0.00724947	0.0224221	0.725308	-0.463334
PABPC1	P11940	sp|P11940|PABP1_HUMAN Polyadenylate-binding protein 1 OS=Homo sapiens OX=9606 GN=PABPC1 PE=1 SV=2	10	0.000121778	9.51906e-05	1.97939e-05	0.00151879	1.27931	0.355364
CRABP2	P29373	sp|P29373|RABP2_HUMAN Cellular retinoic acid-binding protein 2 OS=Homo sapiens OX=9606 GN=CRABP2 PE=1 SV=2	5	0.000113335	0.00014481	0.00333783	0.0144679	0.782651	-0.353559
HNRNPDL	O14979	sp|O14979|HNRDL_HUMAN Heterogeneous nuclear ribonucleoprotein D-like OS=Homo sapiens OX=9606 GN=HNRNPDL PE=1 SV=3	4	0.000153526	0.000103834	0.00122717	0.00890314	1.47858	0.564209
SRP9	P49458	sp|P49458|SRP09_HUMAN Signal recognition particle 9 kDa protein OS=Homo sapiens OX=9606 GN=SRP9 PE=1 SV=2	3	0.000168588	0.000301151	0.0275442	0.0501472	0.559811	-0.836989
APOC3	P02656	sp|P02656|APOC3_HUMAN Apolipoprotein C-III OS=Homo sapiens OX=9606 GN=APOC3 PE=1 SV=1	2	6.24376e-05	0.00039592	0.01237	0.0302245	0.157702	-2.66472
NUDT21	O43809	sp|O43809|CPSF5_HUMAN Cleavage and polyadenylation specificity factor subunit 5 OS=Homo sapiens OX=9606 GN=NUDT21 PE=1 SV=1	7	0.000131032	9.37311e-05	0.00122576	0.00889856	1.39795	0.483318
NDUFAF3	Q9BU61	sp|Q9BU61|NDUF3_HUMAN NADH dehydrogenase [ubiquinone] 1 alpha subcomplex assembly factor 3 OS=Homo sapiens OX=9606 GN=NDUFAF3 PE=1 SV=1	4	9.39636e-05	0.000145782	0.00074592	0.00718097	0.64455	-0.633637
SRSF10	O75494	sp|O75494|SRS10_HUMAN Serine/arginine-rich splicing factor 10 OS=Homo sapiens OX=9606 GN=SRSF10 PE=1 SV=1	3	0.000138914	8.7221e-05	0.00758413	0.0229769	1.59267	0.671447
CORO2A	Q92828	sp|Q92828|COR2A_HUMAN Coronin-2A OS=Homo sapiens OX=9606 GN=CORO2A PE=1 SV=2	5	0.000209777	7.54313e-06	7.9767e-06	0.00131446	27.8103	4.79755
CMAS	Q8NFW8	sp|Q8NFW8|NEUA_HUMAN N-acylneuraminate cytidylyltransferase OS=Homo sapiens OX=9606 GN=CMAS PE=1 SV=2	10	8.9806e-05	0.000119824	0.00295365	0.013784	0.749483	-0.416032
CCDC47	Q96A33	sp|Q96A33|CCD47_HUMAN Coiled-coil domain-containing protein 47 OS=Homo sapiens OX=9606 GN=CCDC47 PE=1 SV=1	12	0.000130479	0.000106744	0.000459039	0.00584489	1.22236	0.289665
TMED5	Q9Y3A6	sp|Q9Y3A6|TMED5_HUMAN Transmembrane emp24 domain-containing protein 5 OS=Homo sapiens OX=9606 GN=TMED5 PE=1 SV=1	3	0.000127022	9.24468e-05	0.000510061	0.00610448	1.374	0.458378
CPSF7	Q8N684	sp|Q8N684|CPSF7_HUMAN Cleavage and polyadenylation specificity factor subunit 7 OS=Homo sapiens OX=9606 GN=CPSF7 PE=1 SV=1	9	0.000109817	8.78653e-05	0.00812113	0.0238212	1.24984	0.321742
BZW1	Q7L1Q6	sp|Q7L1Q6|BZW1_HUMAN Basic leucine zipper and W2 domain-containing protein 1 OS=Homo sapiens OX=9606 GN=BZW1 PE=1 SV=1	8	0.000105518	7.66798e-05	0.000755967	0.00722176	1.37608	0.460569
RNPS1	Q15287	sp|Q15287|RNPS1_HUMAN RNA-binding protein with serine-rich domain 1 OS=Homo sapiens OX=9606 GN=RNPS1 PE=1 SV=1	3	0.000122343	8.25281e-05	0.000520683	0.00615465	1.48244	0.567978
TGOLN2	O43493	sp|O43493|TGON2_HUMAN Trans-Golgi network integral membrane protein 2 OS=Homo sapiens OX=9606 GN=TGOLN2 PE=1 SV=3	8	0.0001318	0.000166291	0.00108406	0.00840518	0.792591	-0.335351
NCEH1	Q6PIU2	sp|Q6PIU2|NCEH1_HUMAN Neutral cholesterol ester hydrolase 1 OS=Homo sapiens OX=9606 GN=NCEH1 PE=1 SV=3	6	8.82224e-05	0.000111681	0.0187497	0.0391798	0.789949	-0.340168
MCTS1	Q9ULC4	sp|Q9ULC4|MCTS1_HUMAN Malignant T-cell-amplified sequence 1 OS=Homo sapiens OX=9606 GN=MCTS1 PE=1 SV=1	4	0.000109374	9.07409e-05	0.00580688	0.019765	1.20535	0.269448
TSFM	P43897	sp|P43897|EFTS_HUMAN Elongation factor Ts, mitochondrial OS=Homo sapiens OX=9606 GN=TSFM PE=1 SV=2	7	0.000149162	0.000107707	0.0192379	0.0398182	1.38488	0.469762
RUVBL2	Q9Y230	sp|Q9Y230|RUVB2_HUMAN RuvB-like 2 OS=Homo sapiens OX=9606 GN=RUVBL2 PE=1 SV=3	15	0.000114627	8.64411e-05	0.0439917	0.0676935	1.32607	0.407162
ARL8A	Q96BM9	sp|Q96BM9|ARL8A_HUMAN ADP-ribosylation factor-like protein 8A OS=Homo sapiens OX=9606 GN=ARL8A PE=1 SV=1	2	0.000132644	5.26949e-05	7.99129e-05	0.00289342	2.5172	1.33182
EIF1	P41567	sp|P41567|EIF1_HUMAN Eukaryotic translation initiation factor 1 OS=Homo sapiens OX=9606 GN=EIF1 PE=1 SV=1;sp|O60739|EIF1B_HUMAN Eukaryotic translation initiation factor 1b OS=Homo sapiens OX=9606 GN=EIF1B PE=1 SV=2	4	4.20207e-05	3.01572e-05	0.0257463	0.0479671	1.39339	0.478595
DHX15	O43143	sp|O43143|DHX15_HUMAN Pre-mRNA-splicing factor ATP-dependent RNA helicase DHX15 OS=Homo sapiens OX=9606 GN=DHX15 PE=1 SV=2	17	0.000107449	8.37968e-05	0.0141481	0.032557	1.28226	0.358687
HNRNPH2	P55795	sp|P55795|HNRH2_HUMAN Heterogeneous nuclear ribonucleoprotein H2 OS=Homo sapiens OX=9606 GN=HNRNPH2 PE=1 SV=1	5	0.000107483	7.31129e-05	0.02644	0.0488201	1.47009	0.555908
GSTO1	P78417	sp|P78417|GSTO1_HUMAN Glutathione S-transferase omega-1 OS=Homo sapiens OX=9606 GN=GSTO1 PE=1 SV=2	5	0.000118847	9.08883e-05	0.013914	0.0322655	1.30761	0.386934
DCD	P81605	sp|P81605|DCD_HUMAN Dermcidin OS=Homo sapiens OX=9606 GN=DCD PE=1 SV=2	2	5.84177e-05	0.000169321	0.000165489	0.00382685	0.345011	-1.53528
CYSTM1	Q9H1C7	sp|Q9H1C7|CYTM1_HUMAN Cysteine-rich and transmembrane domain-containing protein 1 OS=Homo sapiens OX=9606 GN=CYSTM1 PE=1 SV=1	1	0.000130768	9.55098e-05	0.010668	0.0277049	1.36916	0.453287
ATL3	Q6DD88	sp|Q6DD88|ATLA3_HUMAN Atlastin-3 OS=Homo sapiens OX=9606 GN=ATL3 PE=1 SV=1	10	9.32567e-05	7.56001e-05	0.00842205	0.0243118	1.23355	0.302818
HMOX2	P30519	sp|P30519|HMOX2_HUMAN Heme oxygenase 2 OS=Homo sapiens OX=9606 GN=HMOX2 PE=1 SV=2	7	8.40056e-05	0.000108222	0.00117343	0.00872384	0.776234	-0.365436
HINT2	Q9BX68	sp|Q9BX68|HINT2_HUMAN Histidine triad nucleotide-binding protein 2, mitochondrial OS=Homo sapiens OX=9606 GN=HINT2 PE=1 SV=1	3	6.86116e-05	0.000113687	0.00278945	0.0134586	0.603513	-0.728543
GNAI2	P04899	sp|P04899|GNAI2_HUMAN Guanine nucleotide-binding protein G(i) subunit alpha-2 OS=Homo sapiens OX=9606 GN=GNAI2 PE=1 SV=3	5	0.000116626	8.15253e-05	6.76213e-05	0.00267985	1.43055	0.51657
TMEM120A	Q9BXJ8	sp|Q9BXJ8|T120A_HUMAN Transmembrane protein 120A OS=Homo sapiens OX=9606 GN=TMEM120A PE=1 SV=1	6	8.08272e-05	9.87487e-05	0.0238676	0.0456357	0.818514	-0.288921
SNRNP200	O75643	sp|O75643|U520_HUMAN U5 small nuclear ribonucleoprotein 200 kDa helicase OS=Homo sapiens OX=9606 GN=SNRNP200 PE=1 SV=2	47	0.000106839	8.84073e-05	0.0100922	0.0267799	1.20849	0.2732
PEX11B	O96011	sp|O96011|PX11B_HUMAN Peroxisomal membrane protein 11B OS=Homo sapiens OX=9606 GN=PEX11B PE=1 SV=1	5	9.49613e-05	0.000119987	0.0303369	0.0533433	0.791432	-0.337463
SF3B3	Q15393	sp|Q15393|SF3B3_HUMAN Splicing factor 3B subunit 3 OS=Homo sapiens OX=9606 GN=SF3B3 PE=1 SV=4	21	0.000110687	8.77236e-05	0.000439069	0.00573403	1.26177	0.335447
HK2	P52789	sp|P52789|HXK2_HUMAN Hexokinase-2 OS=Homo sapiens OX=9606 GN=HK2 PE=1 SV=2	19	0.000135641	0.000106276	0.0126738	0.0306433	1.27631	0.351979
RAP2C	Q9Y3L5	sp|Q9Y3L5|RAP2C_HUMAN Ras-related protein Rap-2c OS=Homo sapiens OX=9606 GN=RAP2C PE=1 SV=1	2	0.000100946	7.10839e-05	0.00521395	0.0185277	1.4201	0.505988
COPA	P53621	sp|P53621|COPA_HUMAN Coatomer subunit alpha OS=Homo sapiens OX=9606 GN=COPA PE=1 SV=2	25	9.42302e-05	7.45245e-05	0.0118688	0.029514	1.26442	0.338475
RPRD1B	Q9NQG5	sp|Q9NQG5|RPR1B_HUMAN Regulation of nuclear pre-mRNA domain-containing protein 1B OS=Homo sapiens OX=9606 GN=RPRD1B PE=1 SV=1	4	8.36561e-05	6.48743e-05	0.0296552	0.0525834	1.28951	0.366824
ATAD1	Q8NBU5	sp|Q8NBU5|ATAD1_HUMAN ATPase family AAA domain-containing protein 1 OS=Homo sapiens OX=9606 GN=ATAD1 PE=1 SV=1	7	0.000118855	8.36351e-05	0.00149223	0.00985383	1.42111	0.507019
PDCD6IP	Q8WUM4	sp|Q8WUM4|PDC6I_HUMAN Programmed cell death 6-interacting protein OS=Homo sapiens OX=9606 GN=PDCD6IP PE=1 SV=1	24	9.52077e-05	7.18037e-05	0.0163649	0.0358771	1.32595	0.407021
PNPO	Q9NVS9	sp|Q9NVS9|PNPO_HUMAN Pyridoxine-5-phosphate oxidase OS=Homo sapiens OX=9606 GN=PNPO PE=1 SV=1	7	0.000100752	5.82911e-05	0.0420145	0.0657281	1.72842	0.789457
CAPNS1	P04632	sp|P04632|CPNS1_HUMAN Calpain small subunit 1 OS=Homo sapiens OX=9606 GN=CAPNS1 PE=1 SV=1	6	8.44337e-05	6.6562e-05	0.00913978	0.0254213	1.2685	0.343119
ALDH1B1	P30837	sp|P30837|AL1B1_HUMAN Aldehyde dehydrogenase X, mitochondrial OS=Homo sapiens OX=9606 GN=ALDH1B1 PE=1 SV=3	9	0.000101183	8.18333e-05	0.00154487	0.0100507	1.23645	0.306208
MAOB	P27338	sp|P27338|AOFB_HUMAN Amine oxidase [flavin-containing] B OS=Homo sapiens OX=9606 GN=MAOB PE=1 SV=3	11	9.8866e-05	6.37908e-05	0.0138401	0.0321726	1.54985	0.632126
SF3B1	O75533	sp|O75533|SF3B1_HUMAN Splicing factor 3B subunit 1 OS=Homo sapiens OX=9606 GN=SF3B1 PE=1 SV=3	22	9.43561e-05	7.14176e-05	0.00346655	0.0146758	1.32119	0.401835
SLC25A4	P12235	sp|P12235|ADT1_HUMAN ADP/ATP translocase 1 OS=Homo sapiens OX=9606 GN=SLC25A4 PE=1 SV=4	6	0.000100654	3.22253e-05	0.000559264	0.00633501	3.12343	1.64313
DECR2	Q9NUI1	sp|Q9NUI1|DECR2_HUMAN Peroxisomal 2,4-dienoyl-CoA reductase OS=Homo sapiens OX=9606 GN=DECR2 PE=1 SV=1	5	8.28953e-05	0.000108041	0.0270629	0.0495733	0.767255	-0.382222
MRPL11	Q9Y3B7	sp|Q9Y3B7|RM11_HUMAN 39S ribosomal protein L11, mitochondrial OS=Homo sapiens OX=9606 GN=MRPL11 PE=1 SV=1	7	7.62678e-05	9.60691e-05	0.00165972	0.0104608	0.793885	-0.332997
RPS10	P46783	sp|P46783|RS10_HUMAN 40S ribosomal protein S10 OS=Homo sapiens OX=9606 GN=RPS10 PE=1 SV=1;sp|Q9NQ39|RS10L_HUMAN Putative 40S ribosomal protein S10-like OS=Homo sapiens OX=9606 GN=RPS10P5 PE=5 SV=1	5	6.0676e-05	3.00905e-05	0.000597343	0.00649952	2.01645	1.01182
COMTD1	Q86VU5	sp|Q86VU5|CMTD1_HUMAN Catechol O-methyltransferase domain-containing protein 1 OS=Homo sapiens OX=9606 GN=COMTD1 PE=1 SV=1	5	6.40746e-05	9.12027e-05	0.000276261	0.00466885	0.702552	-0.509324
MT-ATP8	P03928	sp|P03928|ATP8_HUMAN ATP synthase protein 8 OS=Homo sapiens OX=9606 GN=MT-ATP8 PE=1 SV=1	1	5.76544e-05	0.00010373	0.00199835	0.0115333	0.555812	-0.84733
MRPL58	Q14197	sp|Q14197|ICT1_HUMAN Peptidyl-tRNA hydrolase ICT1, mitochondrial OS=Homo sapiens OX=9606 GN=MRPL58 PE=1 SV=1	2	6.68214e-05	8.70231e-05	0.0184201	0.0387419	0.767858	-0.381088
GRPEL1	Q9HAV7	sp|Q9HAV7|GRPE1_HUMAN GrpE protein homolog 1, mitochondrial OS=Homo sapiens OX=9606 GN=GRPEL1 PE=1 SV=2	3	5.77113e-05	0.000115206	3.51835e-06	0.00119285	0.500939	-0.997294
CTSZ	Q9UBR2	sp|Q9UBR2|CATZ_HUMAN Cathepsin Z OS=Homo sapiens OX=9606 GN=CTSZ PE=1 SV=1	4	4.99929e-05	0.000124619	0.00688695	0.0217943	0.401165	-1.31773
ADH5	P11766	sp|P11766|ADHX_HUMAN Alcohol dehydrogenase class-3 OS=Homo sapiens OX=9606 GN=ADH5 PE=1 SV=4	5	8.27158e-05	6.87526e-05	0.00429166	0.0164999	1.20309	0.26675
LRPAP1	P30533	sp|P30533|AMRP_HUMAN Alpha-2-macroglobulin receptor-associated protein OS=Homo sapiens OX=9606 GN=LRPAP1 PE=1 SV=1	10	0.000117565	9.31017e-05	0.000927227	0.00783184	1.26275	0.336574
TSPAN13	O95857	sp|O95857|TSN13_HUMAN Tetraspanin-13 OS=Homo sapiens OX=9606 GN=TSPAN13 PE=2 SV=1	3	8.31225e-05	0.000107416	6.48738e-05	0.00262646	0.773837	-0.369898
UFL1	O94874	sp|O94874|UFL1_HUMAN E3 UFM1-protein ligase 1 OS=Homo sapiens OX=9606 GN=UFL1 PE=1 SV=2	14	6.362e-05	5.03591e-05	0.00180519	0.0109448	1.26333	0.337228
EHD1	Q9H4M9	sp|Q9H4M9|EHD1_HUMAN EH domain-containing protein 1 OS=Homo sapiens OX=9606 GN=EHD1 PE=1 SV=2	12	8.64518e-05	6.61213e-05	0.024027	0.0458271	1.30747	0.386781
RPL38	P63173	sp|P63173|RL38_HUMAN 60S ribosomal protein L38 OS=Homo sapiens OX=9606 GN=RPL38 PE=1 SV=2	2	7.85015e-05	6.17624e-05	0.00914886	0.0254348	1.27102	0.34599
EIF1AX	P47813	sp|P47813|IF1AX_HUMAN Eukaryotic translation initiation factor 1A, X-chromosomal OS=Homo sapiens OX=9606 GN=EIF1AX PE=1 SV=2;sp|O14602|IF1AY_HUMAN Eukaryotic translation initiation factor 1A, Y-chromosomal OS=Homo sapiens OX=9606 GN=EIF1AY PE=1 SV=4	2	0.000114237	1.57505e-05	1.39767e-06	0.00102902	7.25291	2.85856
CXADR	P78310	sp|P78310|CXAR_HUMAN Coxsackievirus and adenovirus receptor OS=Homo sapiens OX=9606 GN=CXADR PE=1 SV=1	7	9.64229e-05	7.95915e-05	0.0298572	0.05281	1.21147	0.276761
ACAD9	Q9H845	sp|Q9H845|ACAD9_HUMAN Acyl-CoA dehydrogenase family member 9, mitochondrial OS=Homo sapiens OX=9606 GN=ACAD9 PE=1 SV=1	14	8.01984e-05	6.24047e-05	0.00780398	0.0233292	1.28513	0.36192
COPB1	P53618	sp|P53618|COPB_HUMAN Coatomer subunit beta OS=Homo sapiens OX=9606 GN=COPB1 PE=1 SV=3	16	7.57108e-05	5.75917e-05	0.000320153	0.00493484	1.31461	0.394638
RPA3	P35244	sp|P35244|RFA3_HUMAN Replication protein A 14 kDa subunit OS=Homo sapiens OX=9606 GN=RPA3 PE=1 SV=1	4	5.99611e-05	3.5437e-05	0.0203799	0.041265	1.69205	0.75877
DDX1	Q92499	sp|Q92499|DDX1_HUMAN ATP-dependent RNA helicase DDX1 OS=Homo sapiens OX=9606 GN=DDX1 PE=1 SV=2	15	8.64834e-05	6.76889e-05	0.0435077	0.0672183	1.27766	0.353503
HACD2	Q6Y1H2	sp|Q6Y1H2|HACD2_HUMAN Very-long-chain (3R)-3-hydroxyacyl-CoA dehydratase 2 OS=Homo sapiens OX=9606 GN=HACD2 PE=1 SV=1	1	0.000111792	5.61404e-05	1.10049e-05	0.00134811	1.99129	0.993705
FGG	P02679	sp|P02679|FIBG_HUMAN Fibrinogen gamma chain OS=Homo sapiens OX=9606 GN=FGG PE=1 SV=3	1	0.000160899	4.65351e-05	3.55842e-05	0.00187133	3.45759	1.78977
CAPZA1	P52907	sp|P52907|CAZA1_HUMAN F-actin-capping protein subunit alpha-1 OS=Homo sapiens OX=9606 GN=CAPZA1 PE=1 SV=3	4	7.13537e-05	4.22869e-05	3.002e-05	0.00177372	1.68737	0.754778
PRPF8	Q6P2Q9	sp|Q6P2Q9|PRP8_HUMAN Pre-mRNA-processing-splicing factor 8 OS=Homo sapiens OX=9606 GN=PRPF8 PE=1 SV=2	46	7.60665e-05	6.17669e-05	0.001285	0.00908668	1.23151	0.300427
ELOC	Q15369	sp|Q15369|ELOC_HUMAN Elongin-C OS=Homo sapiens OX=9606 GN=ELOC PE=1 SV=1	4	9.51223e-05	6.55784e-05	0.000250825	0.00451376	1.45051	0.536562
RPL21	P46778	sp|P46778|RL21_HUMAN 60S ribosomal protein L21 OS=Homo sapiens OX=9606 GN=RPL21 PE=1 SV=2	4	6.55556e-05	3.77812e-05	0.00018614	0.00401087	1.73514	0.795051
RAB21	Q9UL25	sp|Q9UL25|RAB21_HUMAN Ras-related protein Rab-21 OS=Homo sapiens OX=9606 GN=RAB21 PE=1 SV=3	6	1.68248e-05	0.000108447	0.00129371	0.00911351	0.155143	-2.68833
NDUFB11	Q9NX14	sp|Q9NX14|NDUBB_HUMAN NADH dehydrogenase [ubiquinone] 1 beta subcomplex subunit 11, mitochondrial OS=Homo sapiens OX=9606 GN=NDUFB11 PE=1 SV=1	2	9.18631e-05	5.73181e-05	0.00949367	0.0259391	1.60269	0.680495
PEX11G	Q96HA9	sp|Q96HA9|PX11C_HUMAN Peroxisomal membrane protein 11C OS=Homo sapiens OX=9606 GN=PEX11G PE=1 SV=1	3	4.06115e-05	7.63142e-05	0.00253756	0.0129142	0.532162	-0.910063
PRPF40A	O75400	sp|O75400|PR40A_HUMAN Pre-mRNA-processing factor 40 homolog A OS=Homo sapiens OX=9606 GN=PRPF40A PE=1 SV=2	11	7.56998e-05	5.71869e-05	0.0019303	0.0113325	1.32373	0.404607
MRPL43	Q8N983	sp|Q8N983|RM43_HUMAN 39S ribosomal protein L43, mitochondrial OS=Homo sapiens OX=9606 GN=MRPL43 PE=1 SV=1	5	5.61789e-05	8.95044e-05	0.000898223	0.00773866	0.627667	-0.671929
CLPTM1	O96005	sp|O96005|CLPT1_HUMAN Cleft lip and palate transmembrane protein 1 OS=Homo sapiens OX=9606 GN=CLPTM1 PE=1 SV=1	11	6.12335e-05	7.75404e-05	0.00427477	0.0164652	0.789698	-0.340628
PSMA5	P28066	sp|P28066|PSA5_HUMAN Proteasome subunit alpha type-5 OS=Homo sapiens OX=9606 GN=PSMA5 PE=1 SV=3	4	4.66805e-05	6.86279e-05	0.000243896	0.00446796	0.680197	-0.555975
NARS	O43776	sp|O43776|SYNC_HUMAN Asparagine--tRNA ligase, cytoplasmic OS=Homo sapiens OX=9606 GN=NARS PE=1 SV=1	8	8.04888e-05	6.08879e-05	0.0443906	0.068088	1.32192	0.402632
SCO2	O43819	sp|O43819|SCO2_HUMAN Protein SCO2 homolog, mitochondrial OS=Homo sapiens OX=9606 GN=SCO2 PE=1 SV=3	2	0.000117057	1.92494e-05	0.00428371	0.0164836	6.08105	2.60432
MT-CO1	P00395	sp|P00395|COX1_HUMAN Cytochrome c oxidase subunit 1 OS=Homo sapiens OX=9606 GN=MT-CO1 PE=1 SV=1	2	2.04781e-08	3.06008e-08	0.0035013	0.0147303	0.669199	-0.579492
CDIPT	O14735	sp|O14735|CDIPT_HUMAN CDP-diacylglycerol--inositol 3-phosphatidyltransferase OS=Homo sapiens OX=9606 GN=CDIPT PE=1 SV=1	2	6.29556e-05	4.7105e-05	0.0208411	0.0418316	1.3365	0.418456
RECQL	P46063	sp|P46063|RECQ1_HUMAN ATP-dependent DNA helicase Q1 OS=Homo sapiens OX=9606 GN=RECQL PE=1 SV=3	7	6.50723e-05	5.34198e-05	0.00125905	0.00900549	1.21813	0.284669
HACL1	Q9UJ83	sp|Q9UJ83|HACL1_HUMAN 2-hydroxyacyl-CoA lyase 1 OS=Homo sapiens OX=9606 GN=HACL1 PE=1 SV=2	10	6.78151e-05	5.26333e-05	0.0335794	0.0569686	1.28844	0.365629
TMED3	Q9Y3Q3	sp|Q9Y3Q3|TMED3_HUMAN Transmembrane emp24 domain-containing protein 3 OS=Homo sapiens OX=9606 GN=TMED3 PE=1 SV=1	2	9.58599e-05	5.38067e-05	0.00623986	0.0206046	1.78156	0.833142
MRPS26	Q9BYN8	sp|Q9BYN8|RT26_HUMAN 28S ribosomal protein S26, mitochondrial OS=Homo sapiens OX=9606 GN=MRPS26 PE=1 SV=1	5	8.48745e-05	5.41471e-05	0.0111277	0.028416	1.56748	0.648446
GPX4	P36969	sp|P36969|GPX4_HUMAN Phospholipid hydroperoxide glutathione peroxidase OS=Homo sapiens OX=9606 GN=GPX4 PE=1 SV=3	3	6.50537e-05	4.27975e-05	0.00922597	0.0255491	1.52004	0.604106
PSMB6	P28072	sp|P28072|PSB6_HUMAN Proteasome subunit beta type-6 OS=Homo sapiens OX=9606 GN=PSMB6 PE=1 SV=4	3	7.93574e-05	4.70137e-05	0.00166025	0.0104626	1.68796	0.755282
CHMP5	Q9NZZ3	sp|Q9NZZ3|CHMP5_HUMAN Charged multivesicular body protein 5 OS=Homo sapiens OX=9606 GN=CHMP5 PE=1 SV=1	5	2.82087e-05	5.21636e-05	0.00729939	0.0225063	0.540774	-0.886902
GNL3	Q9BVP2	sp|Q9BVP2|GNL3_HUMAN Guanine nucleotide-binding protein-like 3 OS=Homo sapiens OX=9606 GN=GNL3 PE=1 SV=2	10	3.86377e-05	5.44045e-05	0.00566961	0.0194879	0.710193	-0.493717
MRPL21	Q7Z2W9	sp|Q7Z2W9|RM21_HUMAN 39S ribosomal protein L21, mitochondrial OS=Homo sapiens OX=9606 GN=MRPL21 PE=1 SV=2	3	6.03897e-05	7.53582e-05	0.0139115	0.0322624	0.801369	-0.319461
SDHC	Q99643	sp|Q99643|C560_HUMAN Succinate dehydrogenase cytochrome b560 subunit, mitochondrial OS=Homo sapiens OX=9606 GN=SDHC PE=1 SV=1	3	4.65292e-05	2.27776e-05	0.000602127	0.00651928	2.04276	1.03052
PARL	Q9H300	sp|Q9H300|PARL_HUMAN Presenilins-associated rhomboid-like protein, mitochondrial OS=Homo sapiens OX=9606 GN=PARL PE=1 SV=2	1	8.62553e-05	5.01002e-05	0.00795785	0.0235702	1.72166	0.783796
STX12	Q86Y82	sp|Q86Y82|STX12_HUMAN Syntaxin-12 OS=Homo sapiens OX=9606 GN=STX12 PE=1 SV=1	6	5.60144e-05	7.21202e-05	0.0117602	0.0293567	0.776682	-0.364604
COPG1	Q9Y678	sp|Q9Y678|COPG1_HUMAN Coatomer subunit gamma-1 OS=Homo sapiens OX=9606 GN=COPG1 PE=1 SV=1	15	6.04907e-05	4.11275e-05	0.00119114	0.00878392	1.47081	0.556609
SRSF5	Q13243	sp|Q13243|SRSF5_HUMAN Serine/arginine-rich splicing factor 5 OS=Homo sapiens OX=9606 GN=SRSF5 PE=1 SV=1	3	8.21574e-05	5.95161e-05	0.0495441	0.0731492	1.38042	0.46511
AP2A1	O95782	sp|O95782|AP2A1_HUMAN AP-2 complex subunit alpha-1 OS=Homo sapiens OX=9606 GN=AP2A1 PE=1 SV=3	12	5.96262e-05	4.70409e-05	0.00241361	0.0126248	1.26754	0.34203
APOOL	Q6UXV4	sp|Q6UXV4|MIC27_HUMAN MICOS complex subunit MIC27 OS=Homo sapiens OX=9606 GN=APOOL PE=1 SV=1	5	4.109e-05	6.97509e-05	0.000279873	0.00468936	0.589096	-0.763425
BCKDHB	P21953	sp|P21953|ODBB_HUMAN 2-oxoisovalerate dehydrogenase subunit beta, mitochondrial OS=Homo sapiens OX=9606 GN=BCKDHB PE=1 SV=2	4	5.40334e-05	4.05874e-05	0.00171341	0.0106438	1.33129	0.41282
NUP93	Q8N1F7	sp|Q8N1F7|NUP93_HUMAN Nuclear pore complex protein Nup93 OS=Homo sapiens OX=9606 GN=NUP93 PE=1 SV=2	10	6.18906e-05	4.73887e-05	0.00637016	0.0208475	1.30602	0.38518
NDUFV3	P56181	sp|P56181|NDUV3_HUMAN NADH dehydrogenase [ubiquinone] flavoprotein 3, mitochondrial OS=Homo sapiens OX=9606 GN=NDUFV3 PE=1 SV=2	1	7.9322e-05	6.1374e-05	0.0181309	0.0383529	1.29244	0.370094
CPSF6	Q16630	sp|Q16630|CPSF6_HUMAN Cleavage and polyadenylation specificity factor subunit 6 OS=Homo sapiens OX=9606 GN=CPSF6 PE=1 SV=2	6	5.09593e-05	3.63668e-05	0.00514128	0.0183686	1.40126	0.486724
RARS	P54136	sp|P54136|SYRC_HUMAN Arginine--tRNA ligase, cytoplasmic OS=Homo sapiens OX=9606 GN=RARS PE=1 SV=2	9	6.15373e-05	4.69141e-05	0.0017569	0.0107883	1.3117	0.391441
KARS	Q15046	sp|Q15046|SYK_HUMAN Lysine--tRNA ligase OS=Homo sapiens OX=9606 GN=KARS PE=1 SV=3	12	6.39253e-05	4.07095e-05	0.0240168	0.0458148	1.57028	0.651022
DDX19B	Q9UMR2	sp|Q9UMR2|DD19B_HUMAN ATP-dependent RNA helicase DDX19B OS=Homo sapiens OX=9606 GN=DDX19B PE=1 SV=1;sp|Q9NUU7|DD19A_HUMAN ATP-dependent RNA helicase DDX19A OS=Homo sapiens OX=9606 GN=DDX19A PE=1 SV=1	6	5.67283e-05	4.35455e-05	0.00293005	0.0137385	1.30274	0.381545
PXT1	Q8NFP0	sp|Q8NFP0|PXT1_HUMAN Peroxisomal testis-specific protein 1 OS=Homo sapiens OX=9606 GN=PXT1 PE=2 SV=2	2	0.000143837	2.38137e-05	0.036838	0.0603673	6.04008	2.59457
SMIM4	Q8WVI0	sp|Q8WVI0|SMIM4_HUMAN Small integral membrane protein 4 OS=Homo sapiens OX=9606 GN=SMIM4 PE=1 SV=2	1	6.66225e-05	5.37485e-05	0.0196327	0.0403255	1.23952	0.309786
LAMC1	P11047	sp|P11047|LAMC1_HUMAN Laminin subunit gamma-1 OS=Homo sapiens OX=9606 GN=LAMC1 PE=1 SV=3	16	4.87858e-05	7.22013e-05	0.0360562	0.0595732	0.675691	-0.565564
VMP1	Q96GC9	sp|Q96GC9|VMP1_HUMAN Vacuole membrane protein 1 OS=Homo sapiens OX=9606 GN=VMP1 PE=1 SV=1	1	1.17933e-05	5.88486e-05	0.00693922	0.0218866	0.200401	-2.31904
CLDN3	O15551	sp|O15551|CLD3_HUMAN Claudin-3 OS=Homo sapiens OX=9606 GN=CLDN3 PE=1 SV=1;sp|O95484|CLD9_HUMAN Claudin-9 OS=Homo sapiens OX=9606 GN=CLDN9 PE=1 SV=1	1	5.01875e-05	6.18437e-05	0.0373739	0.0609041	0.811522	-0.301298
JAGN1	Q8N5M9	sp|Q8N5M9|JAGN1_HUMAN Protein jagunal homolog 1 OS=Homo sapiens OX=9606 GN=JAGN1 PE=1 SV=1	1	4.94194e-05	3.53064e-05	0.00313292	0.0141157	1.39973	0.485149
SNX4	O95219	sp|O95219|SNX4_HUMAN Sorting nexin-4 OS=Homo sapiens OX=9606 GN=SNX4 PE=1 SV=1	2	5.83487e-06	7.28208e-06	0.0120236	0.0297362	0.801264	-0.31965
DAP3	P51398	sp|P51398|RT29_HUMAN 28S ribosomal protein S29, mitochondrial OS=Homo sapiens OX=9606 GN=DAP3 PE=1 SV=1	6	5.37263e-05	4.23633e-05	0.00708876	0.0221473	1.26823	0.342813
CHP1	Q99653	sp|Q99653|CHP1_HUMAN Calcineurin B homologous protein 1 OS=Homo sapiens OX=9606 GN=CHP1 PE=1 SV=3	2	5.58785e-05	4.46704e-05	0.000874995	0.0076613	1.25091	0.322973
IDH3G	P51553	sp|P51553|IDH3G_HUMAN Isocitrate dehydrogenase [NAD] subunit gamma, mitochondrial OS=Homo sapiens OX=9606 GN=IDH3G PE=1 SV=1	5	6.00803e-05	3.25486e-05	1.61944e-05	0.00140271	1.84586	0.884296
EIF5	P55010	sp|P55010|IF5_HUMAN Eukaryotic translation initiation factor 5 OS=Homo sapiens OX=9606 GN=EIF5 PE=1 SV=2	6	5.8209e-05	3.93223e-05	0.0124671	0.0303593	1.48031	0.565897
RNMT	O43148	sp|O43148|MCES_HUMAN mRNA cap guanine-N7 methyltransferase OS=Homo sapiens OX=9606 GN=RNMT PE=1 SV=1	10	5.34365e-05	3.98335e-05	0.0122801	0.030099	1.3415	0.423845
CDK5RAP3	Q96JB5	sp|Q96JB5|CK5P3_HUMAN CDK5 regulatory subunit-associated protein 3 OS=Homo sapiens OX=9606 GN=CDK5RAP3 PE=1 SV=2	10	6.06669e-05	3.97234e-05	0.00688374	0.0217886	1.52723	0.61092
SLC16A1	P53985	sp|P53985|MOT1_HUMAN Monocarboxylate transporter 1 OS=Homo sapiens OX=9606 GN=SLC16A1 PE=1 SV=3	4	5.76096e-05	3.9192e-05	0.0175701	0.0375858	1.46993	0.555748
PRODH	O43272	sp|O43272|PROD_HUMAN Proline dehydrogenase 1, mitochondrial OS=Homo sapiens OX=9606 GN=PRODH PE=1 SV=3	9	6.05413e-05	4.38689e-05	4.66154e-05	0.00220337	1.38005	0.46472
ATP6V1G2	O95670	sp|O95670|VATG2_HUMAN V-type proton ATPase subunit G 2 OS=Homo sapiens OX=9606 GN=ATP6V1G2 PE=1 SV=1;sp|O75348|VATG1_HUMAN V-type proton ATPase subunit G 1 OS=Homo sapiens OX=9606 GN=ATP6V1G1 PE=1 SV=3	1	4.36986e-05	5.35169e-05	0.0231184	0.0447233	0.816537	-0.292409
PPA1	Q15181	sp|Q15181|IPYR_HUMAN Inorganic pyrophosphatase OS=Homo sapiens OX=9606 GN=PPA1 PE=1 SV=2	6	6.03522e-05	2.97485e-05	0.0102105	0.0269726	2.02875	1.02059
PROM1	O43490	sp|O43490|PROM1_HUMAN Prominin-1 OS=Homo sapiens OX=9606 GN=PROM1 PE=1 SV=1	9	4.40244e-05	3.21043e-05	0.00133966	0.00925921	1.37129	0.455537
MARCH5	Q9NX47	sp|Q9NX47|MARH5_HUMAN E3 ubiquitin-protein ligase MARCH5 OS=Homo sapiens OX=9606 GN=MARCH5 PE=1 SV=1	2	5.33638e-05	4.10551e-05	0.00954663	0.026015	1.29981	0.378303
SFT2D3	Q587I9	sp|Q587I9|SFT2C_HUMAN Vesicle transport protein SFT2C OS=Homo sapiens OX=9606 GN=SFT2D3 PE=2 SV=1	2	3.98315e-05	4.92728e-05	0.00174335	0.0107436	0.808387	-0.306883
SAR1B	Q9Y6B6	sp|Q9Y6B6|SAR1B_HUMAN GTP-binding protein SAR1b OS=Homo sapiens OX=9606 GN=SAR1B PE=1 SV=1	2	5.58427e-05	3.37111e-05	0.000263149	0.00459134	1.65651	0.728144
CAPN5	O15484	sp|O15484|CAN5_HUMAN Calpain-5 OS=Homo sapiens OX=9606 GN=CAPN5 PE=1 SV=2	8	4.02805e-05	5.21394e-05	0.000597034	0.00649824	0.772553	-0.372294
SCAMP4	Q969E2	sp|Q969E2|SCAM4_HUMAN Secretory carrier-associated membrane protein 4 OS=Homo sapiens OX=9606 GN=SCAMP4 PE=1 SV=1	1	4.56877e-05	3.76099e-05	0.0156282	0.0347902	1.21478	0.280694
RLN1	P04808	sp|P04808|REL1_HUMAN Prorelaxin H1 OS=Homo sapiens OX=9606 GN=RLN1 PE=2 SV=1;sp|P04090|REL2_HUMAN Prorelaxin H2 OS=Homo sapiens OX=9606 GN=RLN2 PE=1 SV=1	1	5.70818e-05	3.66367e-05	0.000133273	0.00353797	1.55805	0.639743
DMAC2	Q9NW81	sp|Q9NW81|DMAC2_HUMAN Distal membrane-arm assembly complex protein 2 OS=Homo sapiens OX=9606 GN=DMAC2 PE=1 SV=3	1	0.000115753	1.24472e-05	0.00438866	0.0166962	9.29956	3.21716
CHD4	Q14839	sp|Q14839|CHD4_HUMAN Chromodomain-helicase-DNA-binding protein 4 OS=Homo sapiens OX=9606 GN=CHD4 PE=1 SV=2	25	4.67571e-05	3.85115e-05	0.00810072	0.0237901	1.21411	0.279899
SNRPA1	P09661	sp|P09661|RU2A_HUMAN U2 small nuclear ribonucleoprotein A OS=Homo sapiens OX=9606 GN=SNRPA1 PE=1 SV=2	5	4.36961e-05	3.10534e-05	0.00244865	0.0127076	1.40713	0.492752
NUCKS1	Q9H1E3	sp|Q9H1E3|NUCKS_HUMAN Nuclear ubiquitous casein and cyclin-dependent kinase substrate 1 OS=Homo sapiens OX=9606 GN=NUCKS1 PE=1 SV=1	4	3.23414e-05	1.8933e-05	0.0254038	0.0475402	1.7082	0.772481
NDUFB8	O95169	sp|O95169|NDUB8_HUMAN NADH dehydrogenase [ubiquinone] 1 beta subcomplex subunit 8, mitochondrial OS=Homo sapiens OX=9606 GN=NDUFB8 PE=1 SV=1	1	4.53361e-05	3.5432e-05	0.0227473	0.0442633	1.27952	0.355608
COX20	Q5RI15	sp|Q5RI15|COX20_HUMAN Cytochrome c oxidase assembly protein COX20, mitochondrial OS=Homo sapiens OX=9606 GN=COX20 PE=1 SV=2	1	3.52042e-05	2.2151e-05	0.0133444	0.0315373	1.58928	0.668376
GPR89B	P0CG08	sp|P0CG08|GPHRB_HUMAN Golgi pH regulator B OS=Homo sapiens OX=9606 GN=GPR89B PE=1 SV=1;sp|B7ZAQ6|GPHRA_HUMAN Golgi pH regulator A OS=Homo sapiens OX=9606 GN=GPR89A PE=1 SV=2	3	2.06737e-05	4.95796e-05	0.000876883	0.00766768	0.41698	-1.26195
LCP1	P13796	sp|P13796|PLSL_HUMAN Plastin-2 OS=Homo sapiens OX=9606 GN=LCP1 PE=1 SV=6	9	2.85626e-05	3.47471e-05	0.0227266	0.0442374	0.822012	-0.282768
PAFAH1B1	P43034	sp|P43034|LIS1_HUMAN Platelet-activating factor acetylhydrolase IB subunit alpha OS=Homo sapiens OX=9606 GN=PAFAH1B1 PE=1 SV=2	5	3.59965e-05	2.72414e-05	0.0174542	0.037425	1.32139	0.402056
NAP1L1	P55209	sp|P55209|NP1L1_HUMAN Nucleosome assembly protein 1-like 1 OS=Homo sapiens OX=9606 GN=NAP1L1 PE=1 SV=1	4	3.59121e-05	2.98935e-05	0.0207272	0.0416926	1.20133	0.264636
CPOX	P36551	sp|P36551|HEM6_HUMAN Oxygen-dependent coproporphyrinogen-III oxidase, mitochondrial OS=Homo sapiens OX=9606 GN=CPOX PE=1 SV=3	5	5.11072e-05	3.6171e-05	0.0211971	0.0422822	1.41293	0.498695
SCRN2	Q96FV2	sp|Q96FV2|SCRN2_HUMAN Secernin-2 OS=Homo sapiens OX=9606 GN=SCRN2 PE=1 SV=3	6	4.45153e-05	2.76708e-05	0.0191538	0.039709	1.60875	0.685938
ARPC5L	Q9BPX5	sp|Q9BPX5|ARP5L_HUMAN Actin-related protein 2/3 complex subunit 5-like protein OS=Homo sapiens OX=9606 GN=ARPC5L PE=1 SV=1	2	4.28203e-05	3.125e-05	0.0316196	0.0548066	1.37025	0.45444
EMC6	Q9BV81	sp|Q9BV81|EMC6_HUMAN ER membrane protein complex subunit 6 OS=Homo sapiens OX=9606 GN=EMC6 PE=1 SV=1	1	3.34385e-05	4.94914e-05	0.0153692	0.0344001	0.675642	-0.565669
F13A1	P00488	sp|P00488|F13A_HUMAN Coagulation factor XIII A chain OS=Homo sapiens OX=9606 GN=F13A1 PE=1 SV=4	4	9.04291e-05	2.26801e-05	0.0274916	0.0500849	3.98715	1.99536
TOMM34	Q15785	sp|Q15785|TOM34_HUMAN Mitochondrial import receptor subunit TOM34 OS=Homo sapiens OX=9606 GN=TOMM34 PE=1 SV=2	7	3.943e-05	2.71275e-05	0.0491662	0.0727909	1.45351	0.539538
ERGIC2	Q96RQ1	sp|Q96RQ1|ERGI2_HUMAN Endoplasmic reticulum-Golgi intermediate compartment protein 2 OS=Homo sapiens OX=9606 GN=ERGIC2 PE=1 SV=2	5	3.12476e-05	1.61102e-05	0.0153782	0.0344137	1.93961	0.955766
MRPS28	Q9Y2Q9	sp|Q9Y2Q9|RT28_HUMAN 28S ribosomal protein S28, mitochondrial OS=Homo sapiens OX=9606 GN=MRPS28 PE=1 SV=1	4	5.53965e-05	3.57999e-05	0.00540105	0.0189298	1.54739	0.629841
ACTR1A	P61163	sp|P61163|ACTZ_HUMAN Alpha-centractin OS=Homo sapiens OX=9606 GN=ACTR1A PE=1 SV=1	3	2.5975e-05	4.54834e-05	0.000261369	0.00458042	0.571088	-0.808215
GGH	Q92820	sp|Q92820|GGH_HUMAN Gamma-glutamyl hydrolase OS=Homo sapiens OX=9606 GN=GGH PE=1 SV=2	4	5.40258e-05	2.80625e-05	0.0135851	0.0318484	1.92519	0.945002
SMDT1	Q9H4I9	sp|Q9H4I9|EMRE_HUMAN Essential MCU regulator, mitochondrial OS=Homo sapiens OX=9606 GN=SMDT1 PE=1 SV=1	1	2.67193e-06	1.85914e-05	0.00956982	0.0260481	0.143719	-2.79868
SRPRA	P08240	sp|P08240|SRPRA_HUMAN Signal recognition particle receptor subunit alpha OS=Homo sapiens OX=9606 GN=SRPRA PE=1 SV=2	13	4.8077e-05	3.09026e-05	0.00175004	0.0107657	1.55576	0.637616
EMC7	Q9NPA0	sp|Q9NPA0|EMC7_HUMAN ER membrane protein complex subunit 7 OS=Homo sapiens OX=9606 GN=EMC7 PE=1 SV=1	3	2.14923e-05	1.7664e-05	0.0220227	0.0433495	1.21673	0.283011
BCAT2	O15382	sp|O15382|BCAT2_HUMAN Branched-chain-amino-acid aminotransferase, mitochondrial OS=Homo sapiens OX=9606 GN=BCAT2 PE=1 SV=2	7	5.0053e-05	2.86451e-05	0.000911732	0.00778252	1.74735	0.805168
ASS1	P00966	sp|P00966|ASSY_HUMAN Argininosuccinate synthase OS=Homo sapiens OX=9606 GN=ASS1 PE=1 SV=2	9	4.59983e-05	2.76871e-05	0.0271017	0.0496199	1.66137	0.732369
PLCB3	Q01970	sp|Q01970|PLCB3_HUMAN 1-phosphatidylinositol 4,5-bisphosphate phosphodiesterase beta-3 OS=Homo sapiens OX=9606 GN=PLCB3 PE=1 SV=2	15	3.48047e-05	2.88424e-05	0.0177996	0.0379018	1.20672	0.27109
SNX9	Q9Y5X1	sp|Q9Y5X1|SNX9_HUMAN Sorting nexin-9 OS=Homo sapiens OX=9606 GN=SNX9 PE=1 SV=1	6	3.36446e-05	1.43118e-05	0.0210137	0.0420412	2.35083	1.23317
TMEM245	Q9H330	sp|Q9H330|TM245_HUMAN Transmembrane protein 245 OS=Homo sapiens OX=9606 GN=TMEM245 PE=1 SV=3	4	4.316e-05	3.03483e-05	0.014933	0.0337408	1.42215	0.508077
PSMA2	P25787	sp|P25787|PSA2_HUMAN Proteasome subunit alpha type-2 OS=Homo sapiens OX=9606 GN=PSMA2 PE=1 SV=2	3	2.29302e-05	3.89412e-05	0.00124289	0.00895397	0.588843	-0.764046
MVP	Q14764	sp|Q14764|MVP_HUMAN Major vault protein OS=Homo sapiens OX=9606 GN=MVP PE=1 SV=4	13	4.12613e-05	2.94367e-05	0.0459038	0.0696144	1.4017	0.487174
MRPS11	P82912	sp|P82912|RT11_HUMAN 28S ribosomal protein S11, mitochondrial OS=Homo sapiens OX=9606 GN=MRPS11 PE=1 SV=2	3	3.81904e-05	2.46146e-05	0.0154784	0.0345651	1.55153	0.633694
TMEM214	Q6NUQ4	sp|Q6NUQ4|TM214_HUMAN Transmembrane protein 214 OS=Homo sapiens OX=9606 GN=TMEM214 PE=1 SV=2	13	3.29686e-05	2.69668e-05	0.00580784	0.0197669	1.22256	0.289905
PGM1	P36871	sp|P36871|PGM1_HUMAN Phosphoglucomutase-1 OS=Homo sapiens OX=9606 GN=PGM1 PE=1 SV=3	11	3.73028e-05	2.77764e-05	0.00090681	0.00776664	1.34297	0.425424
REEP3	Q6NUK4	sp|Q6NUK4|REEP3_HUMAN Receptor expression-enhancing protein 3 OS=Homo sapiens OX=9606 GN=REEP3 PE=1 SV=1	2	3.95523e-05	2.88944e-05	0.00217747	0.0120306	1.36886	0.452972
GOSR1	O95249	sp|O95249|GOSR1_HUMAN Golgi SNAP receptor complex member 1 OS=Homo sapiens OX=9606 GN=GOSR1 PE=1 SV=1	3	3.49849e-05	2.83483e-05	0.0114956	0.0289685	1.23411	0.30347
CERS2	Q96G23	sp|Q96G23|CERS2_HUMAN Ceramide synthase 2 OS=Homo sapiens OX=9606 GN=CERS2 PE=1 SV=1	2	3.30406e-05	2.36219e-05	0.000833139	0.00751536	1.39873	0.484117
EGFR	P00533	sp|P00533|EGFR_HUMAN Epidermal growth factor receptor OS=Homo sapiens OX=9606 GN=EGFR PE=1 SV=2	9	4.97199e-05	3.44239e-05	0.00155993	0.010106	1.44434	0.530415
BCL2L13	Q9BXK5	sp|Q9BXK5|B2L13_HUMAN Bcl-2-like protein 13 OS=Homo sapiens OX=9606 GN=BCL2L13 PE=1 SV=1	2	2.28284e-05	4.35672e-05	0.045983	0.0696934	0.523981	-0.932413
GPC3	P51654	sp|P51654|GPC3_HUMAN Glypican-3 OS=Homo sapiens OX=9606 GN=GPC3 PE=1 SV=1	3	7.08665e-05	3.90261e-05	4.02899e-06	0.00120893	1.81587	0.860665
MT-ND4	P03905	sp|P03905|NU4M_HUMAN NADH-ubiquinone oxidoreductase chain 4 OS=Homo sapiens OX=9606 GN=MT-ND4 PE=1 SV=1	3	3.95287e-05	4.28973e-06	0.00486844	0.017769	9.21474	3.20394
EIF4H	Q15056	sp|Q15056|IF4H_HUMAN Eukaryotic translation initiation factor 4H OS=Homo sapiens OX=9606 GN=EIF4H PE=1 SV=5	1	6.41074e-06	1.84035e-05	0.0483714	0.072031	0.348344	-1.52142
LGALS3BP	Q08380	sp|Q08380|LG3BP_HUMAN Galectin-3-binding protein OS=Homo sapiens OX=9606 GN=LGALS3BP PE=1 SV=1	4	3.85635e-05	4.82522e-05	0.0104447	0.0273505	0.799206	-0.32336
MPZL1	O95297	sp|O95297|MPZL1_HUMAN Myelin protein zero-like protein 1 OS=Homo sapiens OX=9606 GN=MPZL1 PE=1 SV=1	2	4.77341e-05	3.19542e-05	0.0204281	0.0413246	1.49383	0.579015
LRRC40	Q9H9A6	sp|Q9H9A6|LRC40_HUMAN Leucine-rich repeat-containing protein 40 OS=Homo sapiens OX=9606 GN=LRRC40 PE=1 SV=1	2	3.66622e-06	1.29867e-05	0.0348619	0.0583345	0.282305	-1.82467
MRPL45	Q9BRJ2	sp|Q9BRJ2|RM45_HUMAN 39S ribosomal protein L45, mitochondrial OS=Homo sapiens OX=9606 GN=MRPL45 PE=1 SV=2	4	2.67986e-05	3.58425e-05	0.00034393	0.00511688	0.747677	-0.419513
PBDC1	Q9BVG4	sp|Q9BVG4|PBDC1_HUMAN Protein PBDC1 OS=Homo sapiens OX=9606 GN=PBDC1 PE=1 SV=1	3	3.53751e-05	2.64453e-05	0.00243184	0.012668	1.33767	0.419725
EEF1E1	O43324	sp|O43324|MCA3_HUMAN Eukaryotic translation elongation factor 1 epsilon-1 OS=Homo sapiens OX=9606 GN=EEF1E1 PE=1 SV=1	3	3.07234e-05	1.5367e-06	2.65683e-05	0.00170005	19.9931	4.32143
NUP205	Q92621	sp|Q92621|NU205_HUMAN Nuclear pore complex protein Nup205 OS=Homo sapiens OX=9606 GN=NUP205 PE=1 SV=3	23	3.46748e-05	2.25139e-05	0.000396049	0.00547474	1.54015	0.623071
HDAC1	Q13547	sp|Q13547|HDAC1_HUMAN Histone deacetylase 1 OS=Homo sapiens OX=9606 GN=HDAC1 PE=1 SV=1	3	3.84662e-05	1.75574e-05	0.00147654	0.009794	2.19088	1.13151
EIF4A2	Q14240	sp|Q14240|IF4A2_HUMAN Eukaryotic initiation factor 4A-II OS=Homo sapiens OX=9606 GN=EIF4A2 PE=1 SV=2	4	4.36628e-05	2.20638e-05	0.00118455	0.00876167	1.97894	0.984725
RBM25	P49756	sp|P49756|RBM25_HUMAN RNA-binding protein 25 OS=Homo sapiens OX=9606 GN=RBM25 PE=1 SV=3	4	3.27135e-05	2.16175e-05	0.000265503	0.00460562	1.51329	0.597687
CTCF	P49711	sp|P49711|CTCF_HUMAN Transcriptional repressor CTCF OS=Homo sapiens OX=9606 GN=CTCF PE=1 SV=1	7	2.12388e-05	1.52836e-05	0.0247599	0.0467273	1.38964	0.474712
PRKACB	P22694	sp|P22694|KAPCB_HUMAN cAMP-dependent protein kinase catalytic subunit beta OS=Homo sapiens OX=9606 GN=PRKACB PE=1 SV=2;sp|P17612|KAPCA_HUMAN cAMP-dependent protein kinase catalytic subunit alpha OS=Homo sapiens OX=9606 GN=PRKACA PE=1 SV=2	3	3.99015e-05	3.03788e-05	0.0062811	0.0206819	1.31346	0.393377
AP1M1	Q9BXS5	sp|Q9BXS5|AP1M1_HUMAN AP-1 complex subunit mu-1 OS=Homo sapiens OX=9606 GN=AP1M1 PE=1 SV=3;sp|Q9Y6Q5|AP1M2_HUMAN AP-1 complex subunit mu-2 OS=Homo sapiens OX=9606 GN=AP1M2 PE=1 SV=4	5	3.03903e-05	1.8491e-05	0.00266422	0.0131952	1.64352	0.716788
FMO5	P49326	sp|P49326|FMO5_HUMAN Dimethylaniline monooxygenase [N-oxide-forming] 5 OS=Homo sapiens OX=9606 GN=FMO5 PE=1 SV=2	8	2.9693e-05	3.6564e-05	0.00171143	0.0106372	0.812084	-0.300299
PSMD12	O00232	sp|O00232|PSD12_HUMAN 26S proteasome non-ATPase regulatory subunit 12 OS=Homo sapiens OX=9606 GN=PSMD12 PE=1 SV=3	4	2.76634e-05	1.70067e-05	0.00839139	0.0242625	1.62662	0.701875
MPC2	O95563	sp|O95563|MPC2_HUMAN Mitochondrial pyruvate carrier 2 OS=Homo sapiens OX=9606 GN=MPC2 PE=1 SV=1	3	3.88004e-05	2.1976e-05	0.000287693	0.00473258	1.76558	0.820142
MRPS24	Q96EL2	sp|Q96EL2|RT24_HUMAN 28S ribosomal protein S24, mitochondrial OS=Homo sapiens OX=9606 GN=MRPS24 PE=1 SV=1	2	3.26152e-05	2.39843e-05	0.0106174	0.027625	1.35985	0.443452
LNPEP	Q9UIQ6	sp|Q9UIQ6|LCAP_HUMAN Leucyl-cystinyl aminopeptidase OS=Homo sapiens OX=9606 GN=LNPEP PE=1 SV=3	11	3.15931e-05	2.58308e-05	0.00418737	0.016284	1.22308	0.290517
SEC31A	O94979	sp|O94979|SC31A_HUMAN Protein transport protein Sec31A OS=Homo sapiens OX=9606 GN=SEC31A PE=1 SV=3	10	3.59751e-05	2.05682e-05	0.0021235	0.0118853	1.74906	0.806582
PSMD5	Q16401	sp|Q16401|PSMD5_HUMAN 26S proteasome non-ATPase regulatory subunit 5 OS=Homo sapiens OX=9606 GN=PSMD5 PE=1 SV=3	5	3.05941e-05	2.36196e-05	0.0375131	0.0610426	1.29528	0.373267
GPAT3	Q53EU6	sp|Q53EU6|GPAT3_HUMAN Glycerol-3-phosphate acyltransferase 3 OS=Homo sapiens OX=9606 GN=GPAT3 PE=1 SV=2	5	3.0285e-05	1.60944e-05	0.0172199	0.0370979	1.88171	0.912045
CSTF2	P33240	sp|P33240|CSTF2_HUMAN Cleavage stimulation factor subunit 2 OS=Homo sapiens OX=9606 GN=CSTF2 PE=1 SV=1	2	3.1105e-05	2.53744e-05	0.0023706	0.0125213	1.22584	0.293772
SERPINB6	P35237	sp|P35237|SPB6_HUMAN Serpin B6 OS=Homo sapiens OX=9606 GN=SERPINB6 PE=1 SV=3	7	2.80814e-05	2.12044e-05	0.0291517	0.0520139	1.32432	0.40525
RAB22A	Q9UL26	sp|Q9UL26|RB22A_HUMAN Ras-related protein Rab-22A OS=Homo sapiens OX=9606 GN=RAB22A PE=1 SV=2;sp|Q13636|RAB31_HUMAN Ras-related protein Rab-31 OS=Homo sapiens OX=9606 GN=RAB31 PE=1 SV=1	3	3.12046e-05	2.37892e-05	0.012803	0.0308187	1.31171	0.391451
QARS	P47897	sp|P47897|SYQ_HUMAN Glutamine--tRNA ligase OS=Homo sapiens OX=9606 GN=QARS PE=1 SV=1	9	2.50686e-05	2.00457e-05	0.000902993	0.00775424	1.25057	0.322586
NUP37	Q8NFH4	sp|Q8NFH4|NUP37_HUMAN Nucleoporin Nup37 OS=Homo sapiens OX=9606 GN=NUP37 PE=1 SV=1	4	3.11581e-05	2.36045e-05	0.0114028	0.0288305	1.32001	0.400545
HARS2	P49590	sp|P49590|SYHM_HUMAN Probable histidine--tRNA ligase, mitochondrial OS=Homo sapiens OX=9606 GN=HARS2 PE=1 SV=1	3	3.33955e-05	2.19818e-05	0.0480225	0.0716947	1.51923	0.603345
ABCB10	Q9NRK6	sp|Q9NRK6|ABCBA_HUMAN ATP-binding cassette sub-family B member 10, mitochondrial OS=Homo sapiens OX=9606 GN=ABCB10 PE=1 SV=2	11	2.77794e-05	1.70719e-05	0.00420929	0.0163298	1.6272	0.702388
NUP43	Q8NFH3	sp|Q8NFH3|NUP43_HUMAN Nucleoporin Nup43 OS=Homo sapiens OX=9606 GN=NUP43 PE=1 SV=1	3	1.68989e-05	2.59823e-05	0.0224849	0.0439348	0.650402	-0.620597
AP1B1	Q10567	sp|Q10567|AP1B1_HUMAN AP-1 complex subunit beta-1 OS=Homo sapiens OX=9606 GN=AP1B1 PE=1 SV=2	6	2.62521e-05	1.95089e-05	0.0485862	0.0722373	1.34565	0.428301
PSMB3	P49720	sp|P49720|PSB3_HUMAN Proteasome subunit beta type-3 OS=Homo sapiens OX=9606 GN=PSMB3 PE=1 SV=2	1	2.62076e-05	2.0914e-05	0.00416609	0.0162394	1.25311	0.325513
FKBP8	Q14318	sp|Q14318|FKBP8_HUMAN Peptidyl-prolyl cis-trans isomerase FKBP8 OS=Homo sapiens OX=9606 GN=FKBP8 PE=1 SV=2	3	3.18383e-05	2.0771e-05	0.00925655	0.0255942	1.53282	0.616191
TARS	P26639	sp|P26639|SYTC_HUMAN Threonine--tRNA ligase, cytoplasmic OS=Homo sapiens OX=9606 GN=TARS PE=1 SV=3	8	1.86444e-05	2.41477e-05	0.0228478	0.0443884	0.772096	-0.373148
THNSL1	Q8IYQ7	sp|Q8IYQ7|THNS1_HUMAN Threonine synthase-like 1 OS=Homo sapiens OX=9606 GN=THNSL1 PE=1 SV=2	6	2.25999e-05	2.79703e-05	0.0319409	0.0551676	0.807996	-0.30758
MTFP1	Q9UDX5	sp|Q9UDX5|MTFP1_HUMAN Mitochondrial fission process protein 1 OS=Homo sapiens OX=9606 GN=MTFP1 PE=1 SV=1	2	2.22663e-05	1.7621e-05	0.0211569	0.0422295	1.26362	0.337563
LANCL1	O43813	sp|O43813|LANC1_HUMAN LanC-like protein 1 OS=Homo sapiens OX=9606 GN=LANCL1 PE=1 SV=1	4	2.78614e-05	1.8896e-05	0.0062869	0.0206928	1.47446	0.560188
NASP	P49321	sp|P49321|NASP_HUMAN Nuclear autoantigenic sperm protein OS=Homo sapiens OX=9606 GN=NASP PE=1 SV=2	7	3.30753e-05	1.66393e-05	0.00250759	0.0128454	1.98778	0.991158
SEPHS1	P49903	sp|P49903|SPS1_HUMAN Selenide, water dikinase 1 OS=Homo sapiens OX=9606 GN=SEPHS1 PE=1 SV=2	2	1.84119e-05	2.5724e-05	0.0387531	0.0623389	0.715747	-0.482479
NDUFS4	O43181	sp|O43181|NDUS4_HUMAN NADH dehydrogenase [ubiquinone] iron-sulfur protein 4, mitochondrial OS=Homo sapiens OX=9606 GN=NDUFS4 PE=1 SV=1	3	3.38002e-05	1.36403e-05	0.00540323	0.0189344	2.47797	1.30916
BCLAF1	Q9NYF8	sp|Q9NYF8|BCLF1_HUMAN Bcl-2-associated transcription factor 1 OS=Homo sapiens OX=9606 GN=BCLAF1 PE=1 SV=2	4	2.19621e-05	2.80185e-05	0.00279962	0.0134793	0.783842	-0.351365
PSMD6	Q15008	sp|Q15008|PSMD6_HUMAN 26S proteasome non-ATPase regulatory subunit 6 OS=Homo sapiens OX=9606 GN=PSMD6 PE=1 SV=1	5	3.48223e-05	2.11879e-05	0.000284114	0.004713	1.6435	0.716772
PDK3	Q15120	sp|Q15120|PDK3_HUMAN [Pyruvate dehydrogenase (acetyl-transferring)] kinase isozyme 3, mitochondrial OS=Homo sapiens OX=9606 GN=PDK3 PE=1 SV=1	6	2.71296e-05	1.9673e-05	0.00566681	0.0194822	1.37903	0.463651
KATNAL2	Q8IYT4	sp|Q8IYT4|KATL2_HUMAN Katanin p60 ATPase-containing subunit A-like 2 OS=Homo sapiens OX=9606 GN=KATNAL2 PE=1 SV=3	1	2.73266e-05	1.85272e-05	0.000676554	0.00688111	1.47495	0.560662
PMM2	O15305	sp|O15305|PMM2_HUMAN Phosphomannomutase 2 OS=Homo sapiens OX=9606 GN=PMM2 PE=1 SV=1	3	1.52381e-05	2.33916e-05	0.000646894	0.00674231	0.651433	-0.61831
LSM4	Q9Y4Z0	sp|Q9Y4Z0|LSM4_HUMAN U6 snRNA-associated Sm-like protein LSm4 OS=Homo sapiens OX=9606 GN=LSM4 PE=1 SV=1	2	2.4932e-05	1.32508e-05	0.0198195	0.0405629	1.88154	0.911917
FAM57A	Q8TBR7	sp|Q8TBR7|FA57A_HUMAN Protein FAM57A OS=Homo sapiens OX=9606 GN=FAM57A PE=1 SV=2	2	2.03679e-05	2.53835e-05	0.0132918	0.0314685	0.802407	-0.317593
LYAR	Q9NX58	sp|Q9NX58|LYAR_HUMAN Cell growth-regulating nucleolar protein OS=Homo sapiens OX=9606 GN=LYAR PE=1 SV=2	2	2.04284e-05	1.64196e-05	0.036069	0.0595863	1.24415	0.315162
ALG1	Q9BT22	sp|Q9BT22|ALG1_HUMAN Chitobiosyldiphosphodolichol beta-mannosyltransferase OS=Homo sapiens OX=9606 GN=ALG1 PE=1 SV=2	3	1.09243e-05	3.18584e-05	6.11423e-06	0.00127911	0.3429	-1.54414
KPNA3	O00505	sp|O00505|IMA4_HUMAN Importin subunit alpha-4 OS=Homo sapiens OX=9606 GN=KPNA3 PE=1 SV=2	2	2.47517e-05	1.91641e-05	0.00371115	0.0152319	1.29156	0.369118
GOLGA5	Q8TBA6	sp|Q8TBA6|GOGA5_HUMAN Golgin subfamily A member 5 OS=Homo sapiens OX=9606 GN=GOLGA5 PE=1 SV=3	7	2.35125e-05	1.50266e-05	0.00530334	0.0187212	1.56472	0.645907
PSMC3	P17980	sp|P17980|PRS6A_HUMAN 26S proteasome regulatory subunit 6A OS=Homo sapiens OX=9606 GN=PSMC3 PE=1 SV=3	7	2.3006e-05	1.49359e-05	0.00398715	0.0158554	1.54031	0.623219
SLC51B	Q86UW2	sp|Q86UW2|OSTB_HUMAN Organic solute transporter subunit beta OS=Homo sapiens OX=9606 GN=SLC51B PE=2 SV=2	2	2.3928e-05	1.50156e-05	0.0474762	0.0711644	1.59354	0.672237
SPTLC2	O15270	sp|O15270|SPTC2_HUMAN Serine palmitoyltransferase 2 OS=Homo sapiens OX=9606 GN=SPTLC2 PE=1 SV=1	6	2.84061e-05	1.54237e-05	0.00176387	0.0108111	1.84172	0.881051
TOP2A	P11388	sp|P11388|TOP2A_HUMAN DNA topoisomerase 2-alpha OS=Homo sapiens OX=9606 GN=TOP2A PE=1 SV=3	11	2.54372e-05	2.01872e-05	0.00295389	0.0137844	1.26006	0.333498
DDX50	Q9BQ39	sp|Q9BQ39|DDX50_HUMAN ATP-dependent RNA helicase DDX50 OS=Homo sapiens OX=9606 GN=DDX50 PE=1 SV=1	8	2.0727e-05	1.43335e-05	0.0188056	0.0392536	1.44606	0.532126
GET4	Q7L5D6	sp|Q7L5D6|GET4_HUMAN Golgi to ER traffic protein 4 homolog OS=Homo sapiens OX=9606 GN=GET4 PE=1 SV=1	2	2.6192e-05	1.74865e-05	0.00341598	0.0145953	1.49784	0.582887
GM2A	P17900	sp|P17900|SAP3_HUMAN Ganglioside GM2 activator OS=Homo sapiens OX=9606 GN=GM2A PE=1 SV=4	1	2.30057e-05	2.82856e-05	0.00537484	0.0188741	0.813336	-0.298077
CSNK2A1	P68400	sp|P68400|CSK21_HUMAN Casein kinase II subunit alpha OS=Homo sapiens OX=9606 GN=CSNK2A1 PE=1 SV=1;sp|Q8NEV1|CSK23_HUMAN Casein kinase II subunit alpha 3 OS=Homo sapiens OX=9606 GN=CSNK2A3 PE=1 SV=2	4	2.74927e-05	1.31392e-05	0.026317	0.0486701	2.09242	1.06518
C2orf72	A6NCS6	sp|A6NCS6|CB072_HUMAN Uncharacterized protein C2orf72 OS=Homo sapiens OX=9606 GN=C2orf72 PE=1 SV=2	4	1.35642e-05	3.93475e-05	0.0182847	0.0385603	0.344728	-1.53647
SMARCA4	P51532	sp|P51532|SMCA4_HUMAN Transcription activator BRG1 OS=Homo sapiens OX=9606 GN=SMARCA4 PE=1 SV=2	9	1.19093e-05	2.06638e-05	0.0148185	0.0335656	0.576336	-0.795017
TMEM70	Q9BUB7	sp|Q9BUB7|TMM70_HUMAN Transmembrane protein 70, mitochondrial OS=Homo sapiens OX=9606 GN=TMEM70 PE=1 SV=2	3	9.12172e-06	2.2078e-05	0.0133031	0.0314834	0.413159	-1.27523
DTD1	Q8TEA8	sp|Q8TEA8|DTD1_HUMAN D-aminoacyl-tRNA deacylase 1 OS=Homo sapiens OX=9606 GN=DTD1 PE=1 SV=2	1	1.91091e-05	1.41991e-05	0.00220735	0.0121095	1.34579	0.428458
SEC11A	P67812	sp|P67812|SC11A_HUMAN Signal peptidase complex catalytic subunit SEC11A OS=Homo sapiens OX=9606 GN=SEC11A PE=1 SV=1	3	1.75252e-05	8.80427e-06	0.0276687	0.0502945	1.99054	0.993158
USP39	Q53GS9	sp|Q53GS9|SNUT2_HUMAN U4/U6.U5 tri-snRNP-associated protein 2 OS=Homo sapiens OX=9606 GN=USP39 PE=1 SV=2	6	1.82654e-05	1.45421e-05	0.00896901	0.0251647	1.25604	0.328879
CRK	P46108	sp|P46108|CRK_HUMAN Adapter molecule crk OS=Homo sapiens OX=9606 GN=CRK PE=1 SV=2	5	1.96104e-05	1.47965e-05	0.0407006	0.0643854	1.32534	0.406367
WDR82	Q6UXN9	sp|Q6UXN9|WDR82_HUMAN WD repeat-containing protein 82 OS=Homo sapiens OX=9606 GN=WDR82 PE=1 SV=1	3	2.37592e-05	1.95781e-05	0.013592	0.0318573	1.21356	0.279247
TBL3	Q12788	sp|Q12788|TBL3_HUMAN Transducin beta-like protein 3 OS=Homo sapiens OX=9606 GN=TBL3 PE=1 SV=2	9	1.19412e-05	1.91121e-05	0.00200952	0.0115656	0.624797	-0.678541
STX4	Q12846	sp|Q12846|STX4_HUMAN Syntaxin-4 OS=Homo sapiens OX=9606 GN=STX4 PE=1 SV=2	4	1.95127e-05	1.25342e-05	0.0470446	0.0707426	1.55675	0.638538
LAS1L	Q9Y4W2	sp|Q9Y4W2|LAS1L_HUMAN Ribosomal biogenesis protein LAS1L OS=Homo sapiens OX=9606 GN=LAS1L PE=1 SV=2	8	1.96068e-05	1.37235e-05	0.000975316	0.00797854	1.4287	0.514701
HPDL	Q96IR7	sp|Q96IR7|HPDL_HUMAN 4-hydroxyphenylpyruvate dioxygenase-like protein OS=Homo sapiens OX=9606 GN=HPDL PE=1 SV=1	3	1.31251e-05	2.06883e-05	7.70529e-05	0.00284709	0.634419	-0.656493
TFB2M	Q9H5Q4	sp|Q9H5Q4|TFB2M_HUMAN Dimethyladenosine transferase 2, mitochondrial OS=Homo sapiens OX=9606 GN=TFB2M PE=1 SV=1	4	2.75265e-05	1.37718e-05	0.0016958	0.0105844	1.99877	0.99911
DLG1	Q12959	sp|Q12959|DLG1_HUMAN Disks large homolog 1 OS=Homo sapiens OX=9606 GN=DLG1 PE=1 SV=2	5	1.74691e-05	2.38818e-05	0.0139512	0.0323122	0.73148	-0.451109
SIRT3	Q9NTG7	sp|Q9NTG7|SIR3_HUMAN NAD-dependent protein deacetylase sirtuin-3, mitochondrial OS=Homo sapiens OX=9606 GN=SIRT3 PE=1 SV=2	2	1.55367e-05	2.16352e-05	0.00398076	0.0158414	0.718124	-0.477696
POLG	P54098	sp|P54098|DPOG1_HUMAN DNA polymerase subunit gamma-1 OS=Homo sapiens OX=9606 GN=POLG PE=1 SV=1	4	2.47777e-05	1.37357e-05	0.000119603	0.00340785	1.80389	0.851109
SAE1	Q9UBE0	sp|Q9UBE0|SAE1_HUMAN SUMO-activating enzyme subunit 1 OS=Homo sapiens OX=9606 GN=SAE1 PE=1 SV=1	4	1.73029e-05	1.24714e-05	0.00932494	0.0256945	1.38741	0.472391
CSTA	P01040	sp|P01040|CYTA_HUMAN Cystatin-A OS=Homo sapiens OX=9606 GN=CSTA PE=1 SV=1	2	2.04781e-08	6.27309e-06	0.0347482	0.0582149	0.00326443	-8.25895
TEX264	Q9Y6I9	sp|Q9Y6I9|TX264_HUMAN Testis-expressed protein 264 OS=Homo sapiens OX=9606 GN=TEX264 PE=1 SV=1	2	2.11755e-05	8.67781e-06	0.000408215	0.00555109	2.44019	1.287
STAG2	Q8N3U4	sp|Q8N3U4|STAG2_HUMAN Cohesin subunit SA-2 OS=Homo sapiens OX=9606 GN=STAG2 PE=1 SV=3	9	1.96609e-05	1.52859e-05	0.0144489	0.0329943	1.28621	0.363128
SH3GL1	Q99961	sp|Q99961|SH3G1_HUMAN Endophilin-A2 OS=Homo sapiens OX=9606 GN=SH3GL1 PE=1 SV=1	3	1.83474e-05	9.05254e-06	1.25553e-05	0.00135943	2.02677	1.01918
WDR74	Q6RFH5	sp|Q6RFH5|WDR74_HUMAN WD repeat-containing protein 74 OS=Homo sapiens OX=9606 GN=WDR74 PE=1 SV=1	4	1.81425e-05	8.22243e-06	0.0165983	0.0362146	2.20647	1.14174
TARS2	Q9BW92	sp|Q9BW92|SYTM_HUMAN Threonine--tRNA ligase, mitochondrial OS=Homo sapiens OX=9606 GN=TARS2 PE=1 SV=1	7	1.83092e-05	2.28146e-05	0.0243195	0.0461758	0.802525	-0.317382
MRPL44	Q9H9J2	sp|Q9H9J2|RM44_HUMAN 39S ribosomal protein L44, mitochondrial OS=Homo sapiens OX=9606 GN=MRPL44 PE=1 SV=1	5	2.53814e-05	1.60217e-05	0.00499748	0.0180535	1.58419	0.663742
EFHD2	Q96C19	sp|Q96C19|EFHD2_HUMAN EF-hand domain-containing protein D2 OS=Homo sapiens OX=9606 GN=EFHD2 PE=1 SV=1	2	1.99781e-05	1.55126e-05	0.00746069	0.0227749	1.28787	0.364982
EHD4	Q9H223	sp|Q9H223|EHD4_HUMAN EH domain-containing protein 4 OS=Homo sapiens OX=9606 GN=EHD4 PE=1 SV=1	4	1.71694e-05	1.33442e-05	0.00550582	0.0191501	1.28666	0.363628
NOC3L	Q8WTT2	sp|Q8WTT2|NOC3L_HUMAN Nucleolar complex protein 3 homolog OS=Homo sapiens OX=9606 GN=NOC3L PE=1 SV=1	4	2.47773e-05	1.35439e-05	8.83539e-06	0.00132615	1.82941	0.871378
LARS2	Q15031	sp|Q15031|SYLM_HUMAN Probable leucine--tRNA ligase, mitochondrial OS=Homo sapiens OX=9606 GN=LARS2 PE=1 SV=2	8	1.50869e-05	2.20377e-05	0.0170803	0.0369014	0.684597	-0.546672
AAAS	Q9NRG9	sp|Q9NRG9|AAAS_HUMAN Aladin OS=Homo sapiens OX=9606 GN=AAAS PE=1 SV=1	3	2.0149e-05	1.36456e-05	0.000584997	0.00644762	1.47659	0.562274
MEST	Q5EB52	sp|Q5EB52|MEST_HUMAN Mesoderm-specific transcript homolog protein OS=Homo sapiens OX=9606 GN=MEST PE=2 SV=2	2	2.00773e-05	1.26591e-05	0.0359871	0.0595024	1.586	0.665393
ACIN1	Q9UKV3	sp|Q9UKV3|ACINU_HUMAN Apoptotic chromatin condensation inducer in the nucleus OS=Homo sapiens OX=9606 GN=ACIN1 PE=1 SV=2	8	1.78337e-05	1.32857e-05	0.00420164	0.0163138	1.34232	0.424728
CFAP20	Q9Y6A4	sp|Q9Y6A4|CFA20_HUMAN Cilia- and flagella-associated protein 20 OS=Homo sapiens OX=9606 GN=CFAP20 PE=1 SV=1	2	9.06668e-06	1.71225e-05	0.0332849	0.0566497	0.529517	-0.917251
SRP54	P61011	sp|P61011|SRP54_HUMAN Signal recognition particle 54 kDa protein OS=Homo sapiens OX=9606 GN=SRP54 PE=1 SV=1	5	2.16921e-05	1.16209e-05	0.0012839	0.00908326	1.86665	0.90045
DBT	P11182	sp|P11182|ODB2_HUMAN Lipoamide acyltransferase component of branched-chain alpha-keto acid dehydrogenase complex, mitochondrial OS=Homo sapiens OX=9606 GN=DBT PE=1 SV=3	4	2.89793e-05	1.44909e-05	0.0173693	0.0373068	1.99982	0.999872
AKAP1	Q92667	sp|Q92667|AKAP1_HUMAN A-kinase anchor protein 1, mitochondrial OS=Homo sapiens OX=9606 GN=AKAP1 PE=1 SV=1	5	1.34839e-05	2.03067e-05	0.00357001	0.0148973	0.664011	-0.590721
ACSL4	O60488	sp|O60488|ACSL4_HUMAN Long-chain-fatty-acid--CoA ligase 4 OS=Homo sapiens OX=9606 GN=ACSL4 PE=1 SV=2	5	2.10659e-05	1.42555e-05	0.0208672	0.0418634	1.47774	0.563394
MRPS34	P82930	sp|P82930|RT34_HUMAN 28S ribosomal protein S34, mitochondrial OS=Homo sapiens OX=9606 GN=MRPS34 PE=1 SV=2	3	2.03511e-05	1.57222e-05	0.00118082	0.00874904	1.29441	0.3723
DDAH2	O95865	sp|O95865|DDAH2_HUMAN N(G),N(G)-dimethylarginine dimethylaminohydrolase 2 OS=Homo sapiens OX=9606 GN=DDAH2 PE=1 SV=1	3	9.72638e-06	1.54937e-05	0.00928504	0.025636	0.627764	-0.671705
GADD45GIP1	Q8TAE8	sp|Q8TAE8|G45IP_HUMAN Growth arrest and DNA damage-inducible proteins-interacting protein 1 OS=Homo sapiens OX=9606 GN=GADD45GIP1 PE=1 SV=1	3	3.90014e-06	2.46653e-05	0.0436716	0.0673797	0.158122	-2.66089
IPO5	O00410	sp|O00410|IPO5_HUMAN Importin-5 OS=Homo sapiens OX=9606 GN=IPO5 PE=1 SV=4	7	1.464e-05	1.12364e-05	0.00685245	0.0217331	1.3029	0.381732
ELOVL5	Q9NYP7	sp|Q9NYP7|ELOV5_HUMAN Elongation of very long chain fatty acids protein 5 OS=Homo sapiens OX=9606 GN=ELOVL5 PE=1 SV=1	1	2.11404e-05	3.55542e-06	0.00958132	0.0260645	5.94597	2.57191
CDCP1	Q9H5V8	sp|Q9H5V8|CDCP1_HUMAN CUB domain-containing protein 1 OS=Homo sapiens OX=9606 GN=CDCP1 PE=1 SV=3	8	1.82304e-05	1.44291e-05	0.00629097	0.0207004	1.26344	0.337359
PFKM	P08237	sp|P08237|PFKAM_HUMAN ATP-dependent 6-phosphofructokinase, muscle type OS=Homo sapiens OX=9606 GN=PFKM PE=1 SV=2	6	2.3955e-05	1.50689e-05	0.00913067	0.0254077	1.58969	0.668747
MRPS18A	Q9NVS2	sp|Q9NVS2|RT18A_HUMAN 39S ribosomal protein S18a, mitochondrial OS=Homo sapiens OX=9606 GN=MRPS18A PE=1 SV=1	2	1.40957e-05	1.8898e-05	0.0239219	0.045701	0.745881	-0.422983
PYGB	P11216	sp|P11216|PYGB_HUMAN Glycogen phosphorylase, brain form OS=Homo sapiens OX=9606 GN=PYGB PE=1 SV=5	6	1.47543e-05	7.84642e-06	0.0074166	0.022702	1.88039	0.911031
PEX16	Q9Y5Y5	sp|Q9Y5Y5|PEX16_HUMAN Peroxisomal membrane protein PEX16 OS=Homo sapiens OX=9606 GN=PEX16 PE=1 SV=2	2	1.87302e-05	1.24297e-05	1.59947e-05	0.00140062	1.5069	0.591579
CHMP6	Q96FZ7	sp|Q96FZ7|CHMP6_HUMAN Charged multivesicular body protein 6 OS=Homo sapiens OX=9606 GN=CHMP6 PE=1 SV=3	2	1.9548e-05	2.27861e-06	0.0151785	0.0341135	8.57892	3.1008
GTF3C5	Q9Y5Q8	sp|Q9Y5Q8|TF3C5_HUMAN General transcription factor 3C polypeptide 5 OS=Homo sapiens OX=9606 GN=GTF3C5 PE=1 SV=2	3	1.67573e-05	1.16941e-05	0.00096835	0.00795786	1.43297	0.51901
EIF3H	O15372	sp|O15372|EIF3H_HUMAN Eukaryotic translation initiation factor 3 subunit H OS=Homo sapiens OX=9606 GN=EIF3H PE=1 SV=1	4	1.05414e-05	2.01673e-05	0.0239692	0.0457577	0.522697	-0.935954
TNPO1	Q92973	sp|Q92973|TNPO1_HUMAN Transportin-1 OS=Homo sapiens OX=9606 GN=TNPO1 PE=1 SV=2	6	1.6895e-05	1.2146e-05	0.00654881	0.021182	1.39099	0.476111
CUTC	Q9NTM9	sp|Q9NTM9|CUTC_HUMAN Copper homeostasis protein cutC homolog OS=Homo sapiens OX=9606 GN=CUTC PE=1 SV=1	4	2.02471e-05	6.581e-06	0.00874964	0.0248284	3.0766	1.62134
PCYOX1L	Q8NBM8	sp|Q8NBM8|PCYXL_HUMAN Prenylcysteine oxidase-like OS=Homo sapiens OX=9606 GN=PCYOX1L PE=1 SV=2	1	2.87409e-06	1.78021e-06	0.00764699	0.0230786	1.61447	0.691057
NIT1	Q86X76	sp|Q86X76|NIT1_HUMAN Deaminated glutathione amidase OS=Homo sapiens OX=9606 GN=NIT1 PE=1 SV=2	5	1.65362e-05	1.07285e-05	0.0344812	0.057933	1.54134	0.624183
SLC35E1	Q96K37	sp|Q96K37|S35E1_HUMAN Solute carrier family 35 member E1 OS=Homo sapiens OX=9606 GN=SLC35E1 PE=1 SV=2	2	2.10594e-05	4.20732e-06	0.0161139	0.0355104	5.00541	2.32349
NRF1	Q16656	sp|Q16656|NRF1_HUMAN Nuclear respiratory factor 1 OS=Homo sapiens OX=9606 GN=NRF1 PE=1 SV=1	2	4.89499e-06	1.61534e-05	0.00184861	0.0110822	0.303032	-1.72246
CRELD1	Q96HD1	sp|Q96HD1|CREL1_HUMAN Cysteine-rich with EGF-like domain protein 1 OS=Homo sapiens OX=9606 GN=CRELD1 PE=1 SV=3	3	1.50804e-05	1.24425e-05	0.0378943	0.0614197	1.21201	0.277398
PPP1CA	P62136	sp|P62136|PP1A_HUMAN Serine/threonine-protein phosphatase PP1-alpha catalytic subunit OS=Homo sapiens OX=9606 GN=PPP1CA PE=1 SV=1	2	1.14907e-05	9.17955e-06	0.026673	0.0491033	1.25177	0.323972
RTN3	O95197	sp|O95197|RTN3_HUMAN Reticulon-3 OS=Homo sapiens OX=9606 GN=RTN3 PE=1 SV=2	1	2.1134e-05	7.20401e-06	0.00779793	0.0233196	2.93365	1.55269
ZW10	O43264	sp|O43264|ZW10_HUMAN Centromere/kinetochore protein zw10 homolog OS=Homo sapiens OX=9606 GN=ZW10 PE=1 SV=3	5	7.05117e-06	2.30143e-06	0.0100954	0.0267844	3.06382	1.61533
MGLL	Q99685	sp|Q99685|MGLL_HUMAN Monoglyceride lipase OS=Homo sapiens OX=9606 GN=MGLL PE=1 SV=2	2	2.59264e-06	9.63167e-06	0.0112924	0.0286652	0.269179	-1.89336
CPSF4	O95639	sp|O95639|CPSF4_HUMAN Cleavage and polyadenylation specificity factor subunit 4 OS=Homo sapiens OX=9606 GN=CPSF4 PE=1 SV=1	1	1.68646e-05	3.06008e-08	0.00158524	0.0101979	551.116	9.10621
PLA2G12B	Q9BX93	sp|Q9BX93|PG12B_HUMAN Group XIIB secretory phospholipase A2-like protein OS=Homo sapiens OX=9606 GN=PLA2G12B PE=1 SV=2	2	2.04781e-08	4.79303e-06	0.00583733	0.0198257	0.00427246	-7.87072
HEATR1	Q9H583	sp|Q9H583|HEAT1_HUMAN HEAT repeat-containing protein 1 OS=Homo sapiens OX=9606 GN=HEATR1 PE=1 SV=3	14	1.6567e-05	1.06458e-05	0.00119968	0.00881254	1.5562	0.638032
NUP58	Q9BVL2	sp|Q9BVL2|NUP58_HUMAN Nucleoporin p58/p45 OS=Homo sapiens OX=9606 GN=NUP58 PE=1 SV=1	2	3.68936e-06	1.94276e-05	0.00719509	0.0223297	0.189903	-2.39667
VASP	P50552	sp|P50552|VASP_HUMAN Vasodilator-stimulated phosphoprotein OS=Homo sapiens OX=9606 GN=VASP PE=1 SV=3	2	1.15716e-05	1.43418e-05	0.0448357	0.0685406	0.806844	-0.309638
SMARCD1	Q96GM5	sp|Q96GM5|SMRD1_HUMAN SWI/SNF-related matrix-associated actin-dependent regulator of chromatin subfamily D member 1 OS=Homo sapiens OX=9606 GN=SMARCD1 PE=1 SV=2	5	9.92297e-06	1.20166e-05	0.0171051	0.0369363	0.825771	-0.276186
OS9	Q13438	sp|Q13438|OS9_HUMAN Protein OS-9 OS=Homo sapiens OX=9606 GN=OS9 PE=1 SV=1	5	2.26899e-05	1.57027e-05	0.00714582	0.0222455	1.44497	0.531035
AP3S1	Q92572	sp|Q92572|AP3S1_HUMAN AP-3 complex subunit sigma-1 OS=Homo sapiens OX=9606 GN=AP3S1 PE=1 SV=1	1	1.52224e-05	1.13802e-05	0.0372126	0.0607432	1.33762	0.419669
ITGB6	P18564	sp|P18564|ITB6_HUMAN Integrin beta-6 OS=Homo sapiens OX=9606 GN=ITGB6 PE=1 SV=2	1	2.04781e-08	2.07889e-05	0.000451949	0.00580617	0.000985047	-9.98752
NIP7	Q9Y221	sp|Q9Y221|NIP7_HUMAN 60S ribosome subunit biogenesis protein NIP7 homolog OS=Homo sapiens OX=9606 GN=NIP7 PE=1 SV=1	2	2.13416e-05	7.47438e-06	0.000187179	0.00402052	2.8553	1.51364
ALG3	Q92685	sp|Q92685|ALG3_HUMAN Dol-P-Man:Man(5)GlcNAc(2)-PP-Dol alpha-1,3-mannosyltransferase OS=Homo sapiens OX=9606 GN=ALG3 PE=1 SV=1	2	1.11148e-05	1.45196e-05	0.0194192	0.0400522	0.765499	-0.385527
HSBP1	O75506	sp|O75506|HSBP1_HUMAN Heat shock factor-binding protein 1 OS=Homo sapiens OX=9606 GN=HSBP1 PE=1 SV=1	2	2.13156e-05	3.06008e-08	0.00994495	0.0265773	696.568	9.44412
CD3EAP	O15446	sp|O15446|RPA34_HUMAN DNA-directed RNA polymerase I subunit RPA34 OS=Homo sapiens OX=9606 GN=CD3EAP PE=1 SV=1	2	1.2598e-05	8.88193e-06	0.0118848	0.0295372	1.41838	0.504249
FECH	P22830	sp|P22830|HEMH_HUMAN Ferrochelatase, mitochondrial OS=Homo sapiens OX=9606 GN=FECH PE=1 SV=2	4	1.62166e-05	7.37238e-06	0.00492763	0.0179003	2.19965	1.13727
G6PD	P11413	sp|P11413|G6PD_HUMAN Glucose-6-phosphate 1-dehydrogenase OS=Homo sapiens OX=9606 GN=G6PD PE=1 SV=4	3	9.49271e-06	1.32031e-05	0.0442116	0.0679081	0.718976	-0.475984
GOLGA2	Q08379	sp|Q08379|GOGA2_HUMAN Golgin subfamily A member 2 OS=Homo sapiens OX=9606 GN=GOLGA2 PE=1 SV=3	5	1.10506e-05	1.35404e-05	0.0334	0.0567746	0.816119	-0.293148
CELF1	Q92879	sp|Q92879|CELF1_HUMAN CUGBP Elav-like family member 1 OS=Homo sapiens OX=9606 GN=CELF1 PE=1 SV=2	1	1.73734e-05	3.74045e-06	0.0238752	0.0456448	4.64475	2.2156
TLN1	Q9Y490	sp|Q9Y490|TLN1_HUMAN Talin-1 OS=Homo sapiens OX=9606 GN=TLN1 PE=1 SV=3	18	1.31746e-05	9.57569e-06	0.0178999	0.0380391	1.37584	0.460313
TUBA4A	P68366	sp|P68366|TBA4A_HUMAN Tubulin alpha-4A chain OS=Homo sapiens OX=9606 GN=TUBA4A PE=1 SV=1	2	1.24797e-05	8.23365e-06	0.0468724	0.0705735	1.51569	0.599977
TAGLN	Q01995	sp|Q01995|TAGL_HUMAN Transgelin OS=Homo sapiens OX=9606 GN=TAGLN PE=1 SV=4	3	9.14659e-06	1.29078e-05	0.0103338	0.0271724	0.708612	-0.496933
ECM1	Q16610	sp|Q16610|ECM1_HUMAN Extracellular matrix protein 1 OS=Homo sapiens OX=9606 GN=ECM1 PE=1 SV=2	2	2.99665e-05	6.48887e-06	4.11285e-06	0.00121122	4.61814	2.20731
GLYR1	Q49A26	sp|Q49A26|GLYR1_HUMAN Putative oxidoreductase GLYR1 OS=Homo sapiens OX=9606 GN=GLYR1 PE=1 SV=4	3	1.32275e-05	1.04696e-05	0.00587145	0.0198935	1.26343	0.337342
SH3TC1	Q8TE82	sp|Q8TE82|S3TC1_HUMAN SH3 domain and tetratricopeptide repeat-containing protein 1 OS=Homo sapiens OX=9606 GN=SH3TC1 PE=1 SV=3	3	1.26888e-05	6.87025e-06	0.0080833	0.0237635	1.84692	0.885119
MISP	Q8IVT2	sp|Q8IVT2|MISP_HUMAN Mitotic interactor and substrate of PLK1 OS=Homo sapiens OX=9606 GN=MISP PE=1 SV=1	5	9.88001e-06	1.45522e-05	0.0328104	0.0561314	0.678936	-0.558652
C7orf50	Q9BRJ6	sp|Q9BRJ6|CG050_HUMAN Uncharacterized protein C7orf50 OS=Homo sapiens OX=9606 GN=C7orf50 PE=1 SV=1	1	1.17818e-05	8.01766e-06	0.00433254	0.0165831	1.46948	0.555307
CNN2	Q99439	sp|Q99439|CNN2_HUMAN Calponin-2 OS=Homo sapiens OX=9606 GN=CNN2 PE=1 SV=4	2	2.32172e-05	9.59559e-06	0.000174854	0.00390225	2.41958	1.27475
MSH2	P43246	sp|P43246|MSH2_HUMAN DNA mismatch repair protein Msh2 OS=Homo sapiens OX=9606 GN=MSH2 PE=1 SV=1	7	7.76975e-06	9.87182e-06	0.0411276	0.0648249	0.787064	-0.345447
NCBP1	Q09161	sp|Q09161|NCBP1_HUMAN Nuclear cap-binding protein subunit 1 OS=Homo sapiens OX=9606 GN=NCBP1 PE=1 SV=1	5	1.31934e-05	7.36474e-06	0.0259122	0.0481725	1.79143	0.841115
SDCBP2	Q9H190	sp|Q9H190|SDCB2_HUMAN Syntenin-2 OS=Homo sapiens OX=9606 GN=SDCBP2 PE=1 SV=2	1	1.89709e-05	3.06008e-08	0.00332751	0.0144508	619.948	9.276
HAGH	Q16775	sp|Q16775|GLO2_HUMAN Hydroxyacylglutathione hydrolase, mitochondrial OS=Homo sapiens OX=9606 GN=HAGH PE=1 SV=2	2	7.44818e-06	1.35325e-05	0.000834055	0.00751864	0.550391	-0.861472
HPCAL1	P37235	sp|P37235|HPCL1_HUMAN Hippocalcin-like protein 1 OS=Homo sapiens OX=9606 GN=HPCAL1 PE=1 SV=3	3	1.90908e-05	2.67213e-06	0.00132837	0.00922337	7.14441	2.83681
IMP3	Q9NV31	sp|Q9NV31|IMP3_HUMAN U3 small nucleolar ribonucleoprotein protein IMP3 OS=Homo sapiens OX=9606 GN=IMP3 PE=1 SV=1	4	6.88507e-06	3.04438e-06	0.00205473	0.0116946	2.26156	1.17732
CD68	P34810	sp|P34810|CD68_HUMAN Macrosialin OS=Homo sapiens OX=9606 GN=CD68 PE=1 SV=2	1	1.56715e-05	1.07646e-05	0.00341532	0.0145942	1.45584	0.541849
DDX54	Q8TDD1	sp|Q8TDD1|DDX54_HUMAN ATP-dependent RNA helicase DDX54 OS=Homo sapiens OX=9606 GN=DDX54 PE=1 SV=2	9	1.31115e-05	6.98577e-06	0.00184111	0.0110587	1.87688	0.908336
ABCB11	O95342	sp|O95342|ABCBB_HUMAN Bile salt export pump OS=Homo sapiens OX=9606 GN=ABCB11 PE=1 SV=2	1	1.2175e-05	7.70347e-06	0.00121538	0.00886457	1.58046	0.660343
ISY1	Q9ULR0	sp|Q9ULR0|ISY1_HUMAN Pre-mRNA-splicing factor ISY1 homolog OS=Homo sapiens OX=9606 GN=ISY1 PE=1 SV=3	2	1.38225e-05	7.05436e-06	0.0156257	0.0347864	1.95942	0.970429
PES1	O00541	sp|O00541|PESC_HUMAN Pescadillo homolog OS=Homo sapiens OX=9606 GN=PES1 PE=1 SV=1	6	1.48866e-05	7.79184e-06	0.00292134	0.0137216	1.91054	0.933978
TUBA1C	Q9BQE3	sp|Q9BQE3|TBA1C_HUMAN Tubulin alpha-1C chain OS=Homo sapiens OX=9606 GN=TUBA1C PE=1 SV=1	1	1.49821e-05	1.0099e-05	0.00789547	0.023473	1.48352	0.569028
LMF2	Q9BU23	sp|Q9BU23|LMF2_HUMAN Lipase maturation factor 2 OS=Homo sapiens OX=9606 GN=LMF2 PE=1 SV=2	3	1.18154e-05	1.60623e-05	0.0149619	0.0337849	0.735598	-0.443011
DNAJC2	Q99543	sp|Q99543|DNJC2_HUMAN DnaJ homolog subfamily C member 2 OS=Homo sapiens OX=9606 GN=DNAJC2 PE=1 SV=4	2	9.1981e-06	3.83284e-06	0.00434959	0.0166176	2.39982	1.26292
FA2H	Q7L5A8	sp|Q7L5A8|FA2H_HUMAN Fatty acid 2-hydroxylase OS=Homo sapiens OX=9606 GN=FA2H PE=1 SV=1	2	1.35409e-05	1.06291e-05	0.0196836	0.0403904	1.27395	0.349309
ANKS4B	Q8N8V4	sp|Q8N8V4|ANS4B_HUMAN Ankyrin repeat and SAM domain-containing protein 4B OS=Homo sapiens OX=9606 GN=ANKS4B PE=1 SV=2	2	1.19443e-05	4.23711e-06	0.000162597	0.00380245	2.81898	1.49517
CROCC	Q5TZA2	sp|Q5TZA2|CROCC_HUMAN Rootletin OS=Homo sapiens OX=9606 GN=CROCC PE=1 SV=1	2	9.58079e-06	7.67527e-06	0.00333527	0.0144637	1.24827	0.319927
MPRIP	Q6WCQ1	sp|Q6WCQ1|MPRIP_HUMAN Myosin phosphatase Rho-interacting protein OS=Homo sapiens OX=9606 GN=MPRIP PE=1 SV=3	7	8.72491e-06	5.8198e-06	0.0103675	0.0272266	1.49918	0.58417
FMR1	Q06787	sp|Q06787|FMR1_HUMAN Synaptic functional regulator FMR1 OS=Homo sapiens OX=9606 GN=FMR1 PE=1 SV=1	4	9.97925e-06	8.22487e-06	0.0041138	0.0161288	1.2133	0.278939
MGAT1	P26572	sp|P26572|MGAT1_HUMAN Alpha-1,3-mannosyl-glycoprotein 2-beta-N-acetylglucosaminyltransferase OS=Homo sapiens OX=9606 GN=MGAT1 PE=1 SV=2	2	7.19543e-06	1.4409e-05	0.000290575	0.00474811	0.499372	-1.00181
STX18	Q9P2W9	sp|Q9P2W9|STX18_HUMAN Syntaxin-18 OS=Homo sapiens OX=9606 GN=STX18 PE=1 SV=1	3	1.18273e-05	5.94305e-06	0.000387677	0.00542072	1.9901	0.992842
UTP6	Q9NYH9	sp|Q9NYH9|UTP6_HUMAN U3 small nucleolar RNA-associated protein 6 homolog OS=Homo sapiens OX=9606 GN=UTP6 PE=2 SV=2	6	1.38636e-05	7.91767e-06	0.00477911	0.0175686	1.75097	0.808155
SLC25A40	Q8TBP6	sp|Q8TBP6|S2540_HUMAN Solute carrier family 25 member 40 OS=Homo sapiens OX=9606 GN=SLC25A40 PE=1 SV=1	2	5.93934e-06	2.05432e-05	6.17711e-05	0.00256334	0.289114	-1.79029
RAB11FIP1	Q6WKZ4	sp|Q6WKZ4|RFIP1_HUMAN Rab11 family-interacting protein 1 OS=Homo sapiens OX=9606 GN=RAB11FIP1 PE=1 SV=3	3	1.53208e-05	1.08117e-05	0.0116956	0.0292626	1.41706	0.502898
RPP30	P78346	sp|P78346|RPP30_HUMAN Ribonuclease P protein subunit p30 OS=Homo sapiens OX=9606 GN=RPP30 PE=1 SV=1	1	1.00332e-05	7.34931e-06	0.0202726	0.0411318	1.36519	0.449097
ATP6AP1	Q15904	sp|Q15904|VAS1_HUMAN V-type proton ATPase subunit S1 OS=Homo sapiens OX=9606 GN=ATP6AP1 PE=1 SV=2	2	1.59196e-05	7.9722e-06	0.000891915	0.0077179	1.99689	0.997757
MAGED2	Q9UNF1	sp|Q9UNF1|MAGD2_HUMAN Melanoma-associated antigen D2 OS=Homo sapiens OX=9606 GN=MAGED2 PE=1 SV=2;sp|Q9Y5V3|MAGD1_HUMAN Melanoma-associated antigen D1 OS=Homo sapiens OX=9606 GN=MAGED1 PE=1 SV=3;sp|Q12816|TROP_HUMAN Trophinin OS=Homo sapiens OX=9606 GN=TRO	2	1.17216e-05	8.76453e-06	0.000385482	0.00540635	1.33739	0.419422
KPNA2	P52292	sp|P52292|IMA1_HUMAN Importin subunit alpha-1 OS=Homo sapiens OX=9606 GN=KPNA2 PE=1 SV=1	5	1.6627e-05	7.66131e-06	0.00014216	0.00361343	2.17026	1.11787
ST14	Q9Y5Y6	sp|Q9Y5Y6|ST14_HUMAN Suppressor of tumorigenicity 14 protein OS=Homo sapiens OX=9606 GN=ST14 PE=1 SV=2	3	1.12288e-05	1.55525e-05	0.00329613	0.0143984	0.721992	-0.469946
XPO1	O14980	sp|O14980|XPO1_HUMAN Exportin-1 OS=Homo sapiens OX=9606 GN=XPO1 PE=1 SV=1	5	1.2226e-05	6.66683e-06	4.16228e-05	0.00206182	1.83385	0.874875
PSMD14	O00487	sp|O00487|PSDE_HUMAN 26S proteasome non-ATPase regulatory subunit 14 OS=Homo sapiens OX=9606 GN=PSMD14 PE=1 SV=1	1	9.75853e-06	7.21208e-06	0.000735658	0.00713864	1.35308	0.436248
ERBIN	Q96RT1	sp|Q96RT1|ERBIN_HUMAN Erbin OS=Homo sapiens OX=9606 GN=ERBIN PE=1 SV=2	6	9.33527e-06	1.24509e-05	0.00686987	0.021764	0.749767	-0.415486
ANXA9	O76027	sp|O76027|ANXA9_HUMAN Annexin A9 OS=Homo sapiens OX=9606 GN=ANXA9 PE=1 SV=3	4	1.35856e-05	4.90902e-06	0.00344299	0.0146385	2.76747	1.46857
SPATS2L	Q9NUQ6	sp|Q9NUQ6|SPS2L_HUMAN SPATS2-like protein OS=Homo sapiens OX=9606 GN=SPATS2L PE=1 SV=2	2	8.85925e-06	6.4871e-06	0.000548462	0.00628586	1.36567	0.449611
FKBP4	Q02790	sp|Q02790|FKBP4_HUMAN Peptidyl-prolyl cis-trans isomerase FKBP4 OS=Homo sapiens OX=9606 GN=FKBP4 PE=1 SV=3	4	1.24152e-05	8.30661e-06	0.00933566	0.0257101	1.49462	0.579779
NUDT16L1	Q9BRJ7	sp|Q9BRJ7|TIRR_HUMAN Tudor-interacting repair regulator protein OS=Homo sapiens OX=9606 GN=NUDT16L1 PE=1 SV=1	1	8.39392e-06	6.94059e-06	0.0239911	0.045784	1.2094	0.274287
FIP1L1	Q6UN15	sp|Q6UN15|FIP1_HUMAN Pre-mRNA 3-end-processing factor FIP1 OS=Homo sapiens OX=9606 GN=FIP1L1 PE=1 SV=1	2	9.74354e-06	5.29338e-06	0.00748777	0.0228195	1.8407	0.880257
TMEM92	Q6UXU6	sp|Q6UXU6|TMM92_HUMAN Transmembrane protein 92 OS=Homo sapiens OX=9606 GN=TMEM92 PE=2 SV=1	1	1.24121e-05	9.04881e-06	0.00748783	0.0228196	1.37168	0.455949
AHSG	P02765	sp|P02765|FETUA_HUMAN Alpha-2-HS-glycoprotein OS=Homo sapiens OX=9606 GN=AHSG PE=1 SV=2	3	1.31835e-05	1.82646e-05	0.019915	0.0406837	0.721805	-0.470318
JUND	P17535	sp|P17535|JUND_HUMAN Transcription factor jun-D OS=Homo sapiens OX=9606 GN=JUND PE=1 SV=3	1	1.18057e-05	5.85147e-06	0.00012618	0.00347276	2.01757	1.01262
CHD1L	Q86WJ1	sp|Q86WJ1|CHD1L_HUMAN Chromodomain-helicase-DNA-binding protein 1-like OS=Homo sapiens OX=9606 GN=CHD1L PE=1 SV=3	5	4.91677e-06	2.72492e-06	0.0424627	0.0661794	1.80437	0.851496
RAP1A	P62834	sp|P62834|RAP1A_HUMAN Ras-related protein Rap-1A OS=Homo sapiens OX=9606 GN=RAP1A PE=1 SV=1	1	1.06026e-05	7.10077e-06	0.000590162	0.0064695	1.49317	0.578375
CYP1A1	P04798	sp|P04798|CP1A1_HUMAN Cytochrome P450 1A1 OS=Homo sapiens OX=9606 GN=CYP1A1 PE=1 SV=1	6	1.9546e-05	7.10339e-06	0.0374596	0.0609894	2.75165	1.4603
SOAT2	O75908	sp|O75908|SOAT2_HUMAN Sterol O-acyltransferase 2 OS=Homo sapiens OX=9606 GN=SOAT2 PE=2 SV=1	2	1.02805e-05	2.23976e-06	0.00600194	0.0201495	4.59001	2.1985
MAT1A	Q00266	sp|Q00266|METK1_HUMAN S-adenosylmethionine synthase isoform type-1 OS=Homo sapiens OX=9606 GN=MAT1A PE=1 SV=2	1	1.44433e-05	7.80031e-06	0.00730179	0.0225104	1.85162	0.888792
CLU	P10909	sp|P10909|CLUS_HUMAN Clusterin OS=Homo sapiens OX=9606 GN=CLU PE=1 SV=1	2	1.43287e-05	6.82918e-06	0.00922903	0.0255536	2.09816	1.06913
HDAC2	Q92769	sp|Q92769|HDAC2_HUMAN Histone deacetylase 2 OS=Homo sapiens OX=9606 GN=HDAC2 PE=1 SV=2	2	9.65804e-06	5.28409e-06	0.00117544	0.00873073	1.82776	0.870074
NSUN4	Q96CB9	sp|Q96CB9|NSUN4_HUMAN 5-methylcytosine rRNA methyltransferase NSUN4 OS=Homo sapiens OX=9606 GN=NSUN4 PE=1 SV=2	2	2.66332e-06	1.49156e-05	0.025591	0.047774	0.178559	-2.48553
PSMD8	P48556	sp|P48556|PSMD8_HUMAN 26S proteasome non-ATPase regulatory subunit 8 OS=Homo sapiens OX=9606 GN=PSMD8 PE=1 SV=2	3	7.01389e-06	5.46892e-06	0.0262472	0.0485846	1.2825	0.358958
SHTN1	A0MZ66	sp|A0MZ66|SHOT1_HUMAN Shootin-1 OS=Homo sapiens OX=9606 GN=SHTN1 PE=1 SV=4	3	3.52898e-06	8.55159e-06	0.0139154	0.0322673	0.412669	-1.27694
ABHD3	Q8WU67	sp|Q8WU67|ABHD3_HUMAN Phospholipase ABHD3 OS=Homo sapiens OX=9606 GN=ABHD3 PE=1 SV=2	1	7.70688e-06	9.56779e-06	0.0417675	0.0654779	0.805502	-0.31204
MRPL10	Q7Z7H8	sp|Q7Z7H8|RM10_HUMAN 39S ribosomal protein L10, mitochondrial OS=Homo sapiens OX=9606 GN=MRPL10 PE=1 SV=3	2	5.89272e-06	1.80579e-06	0.0436507	0.0673591	3.26323	1.7063
AKAP6	Q13023	sp|Q13023|AKAP6_HUMAN A-kinase anchor protein 6 OS=Homo sapiens OX=9606 GN=AKAP6 PE=1 SV=3	2	1.06435e-05	8.80017e-07	0.000391529	0.00544572	12.0947	3.5963
CES4A	Q5XG92	sp|Q5XG92|EST4A_HUMAN Carboxylesterase 4A OS=Homo sapiens OX=9606 GN=CES4A PE=2 SV=2	1	9.3869e-06	5.92126e-06	0.00871286	0.0247713	1.58529	0.664744
RCL1	Q9Y2P8	sp|Q9Y2P8|RCL1_HUMAN RNA 3-terminal phosphate cyclase-like protein OS=Homo sapiens OX=9606 GN=RCL1 PE=1 SV=3	2	2.04781e-08	3.06008e-08	0.0035013	0.0147303	0.669199	-0.579492
FAAH	O00519	sp|O00519|FAAH1_HUMAN Fatty-acid amide hydrolase 1 OS=Homo sapiens OX=9606 GN=FAAH PE=1 SV=2	3	1.02903e-05	5.4543e-06	0.0426838	0.0664006	1.88664	0.915821
PDP1	Q9P0J1	sp|Q9P0J1|PDP1_HUMAN [Pyruvate dehydrogenase [acetyl-transferring]]-phosphatase 1, mitochondrial OS=Homo sapiens OX=9606 GN=PDP1 PE=1 SV=3	2	6.0111e-06	7.83401e-06	0.0011947	0.00879587	0.767309	-0.382121
PAPSS2	O95340	sp|O95340|PAPS2_HUMAN Bifunctional 3-phosphoadenosine 5-phosphosulfate synthase 2 OS=Homo sapiens OX=9606 GN=PAPSS2 PE=1 SV=2	2	8.45114e-06	6.51386e-06	0.00505551	0.0181796	1.29741	0.375635
CAB39	Q9Y376	sp|Q9Y376|CAB39_HUMAN Calcium-binding protein 39 OS=Homo sapiens OX=9606 GN=CAB39 PE=1 SV=1	2	7.21903e-06	1.00262e-05	0.00610783	0.0203539	0.720014	-0.473904
USH1C	Q9Y6N9	sp|Q9Y6N9|USH1C_HUMAN Harmonin OS=Homo sapiens OX=9606 GN=USH1C PE=1 SV=3	3	4.26789e-06	9.4609e-06	9.80892e-05	0.00315939	0.451108	-1.14845
CALD1	Q05682	sp|Q05682|CALD1_HUMAN Caldesmon OS=Homo sapiens OX=9606 GN=CALD1 PE=1 SV=3	3	5.0329e-06	7.87915e-06	0.049516	0.0731225	0.638761	-0.646651
SPG21	Q9NZD8	sp|Q9NZD8|SPG21_HUMAN Maspardin OS=Homo sapiens OX=9606 GN=SPG21 PE=1 SV=1	2	9.73909e-06	5.94009e-06	0.0177163	0.0377875	1.63955	0.713303
APOL2	Q9BQE5	sp|Q9BQE5|APOL2_HUMAN Apolipoprotein L2 OS=Homo sapiens OX=9606 GN=APOL2 PE=1 SV=1	4	3.25416e-06	1.18003e-05	0.00688345	0.0217881	0.275769	-1.85847
THOC5	Q13769	sp|Q13769|THOC5_HUMAN THO complex subunit 5 homolog OS=Homo sapiens OX=9606 GN=THOC5 PE=1 SV=2	3	7.67343e-06	6.17201e-06	0.0310907	0.0542071	1.24326	0.31413
POLR2B	P30876	sp|P30876|RPB2_HUMAN DNA-directed RNA polymerase II subunit RPB2 OS=Homo sapiens OX=9606 GN=POLR2B PE=1 SV=1	4	9.88862e-06	5.78428e-06	0.00507163	0.0182144	1.70957	0.773633
SERPINA1	P01009	sp|P01009|A1AT_HUMAN Alpha-1-antitrypsin OS=Homo sapiens OX=9606 GN=SERPINA1 PE=1 SV=3	3	1.09876e-05	7.1764e-06	0.0496765	0.0732741	1.53108	0.614549
SPOUT1	Q5T280	sp|Q5T280|CI114_HUMAN Putative methyltransferase C9orf114 OS=Homo sapiens OX=9606 GN=SPOUT1 PE=1 SV=3	1	7.31485e-06	6.00986e-06	0.0236289	0.0453473	1.21714	0.283496
MRPL55	Q7Z7F7	sp|Q7Z7F7|RM55_HUMAN 39S ribosomal protein L55, mitochondrial OS=Homo sapiens OX=9606 GN=MRPL55 PE=1 SV=1	2	7.37531e-06	5.04004e-06	0.00654403	0.0211731	1.46334	0.549268
ST6GAL1	P15907	sp|P15907|SIAT1_HUMAN Beta-galactoside alpha-2,6-sialyltransferase 1 OS=Homo sapiens OX=9606 GN=ST6GAL1 PE=1 SV=1	3	7.61656e-06	1.14187e-05	0.0027424	0.0133612	0.667027	-0.584184
UPB1	Q9UBR1	sp|Q9UBR1|BUP1_HUMAN Beta-ureidopropionase OS=Homo sapiens OX=9606 GN=UPB1 PE=1 SV=1	2	1.19094e-05	3.06008e-08	0.00390312	0.0156697	389.187	8.60432
ESPN	B1AK53	sp|B1AK53|ESPN_HUMAN Espin OS=Homo sapiens OX=9606 GN=ESPN PE=1 SV=1	1	7.76164e-06	5.47821e-06	0.00117334	0.00872353	1.41682	0.502657
BLVRA	P53004	sp|P53004|BIEA_HUMAN Biliverdin reductase A OS=Homo sapiens OX=9606 GN=BLVRA PE=1 SV=2	2	8.99763e-06	5.42438e-06	0.0313654	0.0545194	1.65874	0.730086
SLC29A1	Q99808	sp|Q99808|S29A1_HUMAN Equilibrative nucleoside transporter 1 OS=Homo sapiens OX=9606 GN=SLC29A1 PE=1 SV=3	2	2.04781e-08	1.62351e-05	0.00270082	0.0132736	0.00126134	-9.63083
KIN	O60870	sp|O60870|KIN17_HUMAN DNA/RNA-binding protein KIN17 OS=Homo sapiens OX=9606 GN=KIN PE=1 SV=2	1	6.76719e-06	4.95737e-06	0.0204338	0.0413317	1.36508	0.448982
CDK5RAP1	Q96SZ6	sp|Q96SZ6|CK5P1_HUMAN CDK5 regulatory subunit-associated protein 1 OS=Homo sapiens OX=9606 GN=CDK5RAP1 PE=1 SV=2	3	7.18633e-06	8.69653e-06	0.00637238	0.0208516	0.826344	-0.275185
RAB3GAP1	Q15042	sp|Q15042|RB3GP_HUMAN Rab3 GTPase-activating protein catalytic subunit OS=Homo sapiens OX=9606 GN=RAB3GAP1 PE=1 SV=3	4	3.66708e-06	6.43833e-06	0.0130145	0.0311025	0.569569	-0.812058
FASTKD5	Q7L8L6	sp|Q7L8L6|FAKD5_HUMAN FAST kinase domain-containing protein 5, mitochondrial OS=Homo sapiens OX=9606 GN=FASTKD5 PE=1 SV=1	5	3.56952e-06	7.76372e-06	0.0168657	0.0365972	0.45977	-1.12102
EPPK1	P58107	sp|P58107|EPIPL_HUMAN Epiplakin OS=Homo sapiens OX=9606 GN=EPPK1 PE=1 SV=3	21	4.42156e-06	2.65343e-06	0.00202754	0.0116173	1.66636	0.736699
EXD2	Q9NVH0	sp|Q9NVH0|EXD2_HUMAN Exonuclease 3-5 domain-containing protein 2 OS=Homo sapiens OX=9606 GN=EXD2 PE=1 SV=2	3	4.96726e-06	6.5408e-06	0.0477222	0.0714037	0.759427	-0.397017
FLII	Q13045	sp|Q13045|FLII_HUMAN Protein flightless-1 homolog OS=Homo sapiens OX=9606 GN=FLII PE=1 SV=2	4	3.11309e-06	4.94329e-06	0.0463897	0.0700972	0.629761	-0.667123
UMPS	P11172	sp|P11172|UMPS_HUMAN Uridine 5-monophosphate synthase OS=Homo sapiens OX=9606 GN=UMPS PE=1 SV=1	3	4.5624e-06	3.50048e-06	0.049258	0.0728781	1.30336	0.382239
FBLN1	P23142	sp|P23142|FBLN1_HUMAN Fibulin-1 OS=Homo sapiens OX=9606 GN=FBLN1 PE=1 SV=4	2	6.33663e-06	8.501e-06	0.0437539	0.0674605	0.745398	-0.423916
COX6A1	P12074	sp|P12074|CX6A1_HUMAN Cytochrome c oxidase subunit 6A1, mitochondrial OS=Homo sapiens OX=9606 GN=COX6A1 PE=1 SV=4	1	2.04781e-08	3.06008e-08	0.0035013	0.0147303	0.669199	-0.579492
TMEM209	Q96SK2	sp|Q96SK2|TM209_HUMAN Transmembrane protein 209 OS=Homo sapiens OX=9606 GN=TMEM209 PE=1 SV=2	2	7.17292e-06	4.31813e-06	0.0172023	0.0370731	1.66112	0.732156
APP	P05067	sp|P05067|A4_HUMAN Amyloid-beta A4 protein OS=Homo sapiens OX=9606 GN=APP PE=1 SV=3	3	1.07793e-05	5.81127e-06	0.0133557	0.031552	1.85489	0.891334
SLC36A1	Q7Z2H8	sp|Q7Z2H8|S36A1_HUMAN Proton-coupled amino acid transporter 1 OS=Homo sapiens OX=9606 GN=SLC36A1 PE=1 SV=1	1	6.63599e-06	2.8199e-06	0.00274682	0.0133704	2.35327	1.23467
PPM1G	O15355	sp|O15355|PPM1G_HUMAN Protein phosphatase 1G OS=Homo sapiens OX=9606 GN=PPM1G PE=1 SV=1	2	1.87184e-06	6.35955e-06	0.0219305	0.0432317	0.294335	-1.76447
DNAJC10	Q8IXB1	sp|Q8IXB1|DJC10_HUMAN DnaJ homolog subfamily C member 10 OS=Homo sapiens OX=9606 GN=DNAJC10 PE=1 SV=2	3	3.99362e-06	1.11836e-05	3.49123e-05	0.0018607	0.357097	-1.48561
GART	P22102	sp|P22102|PUR2_HUMAN Trifunctional purine biosynthetic protein adenosine-3 OS=Homo sapiens OX=9606 GN=GART PE=1 SV=1	2	5.41589e-06	3.04672e-06	0.0045556	0.0170544	1.77761	0.829941
TM9SF1	O15321	sp|O15321|TM9S1_HUMAN Transmembrane 9 superfamily member 1 OS=Homo sapiens OX=9606 GN=TM9SF1 PE=2 SV=2	2	7.009e-06	2.06428e-06	0.000309596	0.00484974	3.39538	1.76357
DPYSL3	Q14195	sp|Q14195|DPYL3_HUMAN Dihydropyrimidinase-related protein 3 OS=Homo sapiens OX=9606 GN=DPYSL3 PE=1 SV=1	2	2.32071e-06	2.8865e-06	0.0464376	0.0701447	0.803986	-0.314757
DDX42	Q86XP3	sp|Q86XP3|DDX42_HUMAN ATP-dependent RNA helicase DDX42 OS=Homo sapiens OX=9606 GN=DDX42 PE=1 SV=1	3	4.95833e-06	3.75713e-06	0.0127676	0.0307707	1.31971	0.400226
ROCK2	O75116	sp|O75116|ROCK2_HUMAN Rho-associated protein kinase 2 OS=Homo sapiens OX=9606 GN=ROCK2 PE=1 SV=4	5	3.0484e-06	4.72828e-06	0.0383043	0.0618574	0.644715	-0.633266
SEMA4G	Q9NTN9	sp|Q9NTN9|SEM4G_HUMAN Semaphorin-4G OS=Homo sapiens OX=9606 GN=SEMA4G PE=1 SV=1	2	2.30258e-06	7.0659e-06	0.000825408	0.00748742	0.325872	-1.61762
DYNC1LI1	Q9Y6G9	sp|Q9Y6G9|DC1L1_HUMAN Cytoplasmic dynein 1 light intermediate chain 1 OS=Homo sapiens OX=9606 GN=DYNC1LI1 PE=1 SV=3	2	5.13992e-06	3.1252e-06	0.0133487	0.0315428	1.64467	0.717796
PCDH11Y	Q9BZA8	sp|Q9BZA8|PC11Y_HUMAN Protocadherin-11 Y-linked OS=Homo sapiens OX=9606 GN=PCDH11Y PE=1 SV=1;sp|Q9BZA7|PC11X_HUMAN Protocadherin-11 X-linked OS=Homo sapiens OX=9606 GN=PCDH11X PE=2 SV=1	1	6.60218e-06	3.12697e-06	0.000288639	0.0047377	2.11137	1.07818
ARID1A	O14497	sp|O14497|ARI1A_HUMAN AT-rich interactive domain-containing protein 1A OS=Homo sapiens OX=9606 GN=ARID1A PE=1 SV=3	4	4.45187e-06	3.35793e-06	0.0141251	0.0325286	1.32578	0.406842
GALNS	P34059	sp|P34059|GALNS_HUMAN N-acetylgalactosamine-6-sulfatase OS=Homo sapiens OX=9606 GN=GALNS PE=1 SV=1	2	7.26134e-06	3.68255e-06	0.0229181	0.0444756	1.97183	0.979532
P3H3	Q8IVL6	sp|Q8IVL6|P3H3_HUMAN Prolyl 3-hydroxylase 3 OS=Homo sapiens OX=9606 GN=P3H3 PE=1 SV=1	1	5.25524e-06	3.49842e-06	0.0119586	0.0296432	1.50217	0.587053
RACGAP1	Q9H0H5	sp|Q9H0H5|RGAP1_HUMAN Rac GTPase-activating protein 1 OS=Homo sapiens OX=9606 GN=RACGAP1 PE=1 SV=1	2	2.76569e-06	4.48664e-06	0.00390073	0.0156644	0.616428	-0.697996
SARS	P49591	sp|P49591|SYSC_HUMAN Serine--tRNA ligase, cytoplasmic OS=Homo sapiens OX=9606 GN=SARS PE=1 SV=3	1	2.66783e-06	3.53738e-06	0.00934069	0.0257175	0.754182	-0.407015
ASNA1	O43681	sp|O43681|ASNA_HUMAN ATPase ASNA1 OS=Homo sapiens OX=9606 GN=ASNA1 PE=1 SV=2	2	2.04781e-08	3.06008e-08	0.0035013	0.0147303	0.669199	-0.579492
TACSTD2	P09758	sp|P09758|TACD2_HUMAN Tumor-associated calcium signal transducer 2 OS=Homo sapiens OX=9606 GN=TACSTD2 PE=1 SV=3	1	5.32236e-06	3.86969e-06	0.014229	0.0326567	1.3754	0.459849
APOBEC3B	Q9UH17	sp|Q9UH17|ABC3B_HUMAN DNA dC->dU-editing enzyme APOBEC-3B OS=Homo sapiens OX=9606 GN=APOBEC3B PE=1 SV=1;sp|Q96AK3|ABC3D_HUMAN DNA dC->dU-editing enzyme APOBEC-3D OS=Homo sapiens OX=9606 GN=APOBEC3D PE=1 SV=1	1	1.08073e-05	3.06008e-08	0.0010566	0.00830169	353.169	8.46422
DHX30	Q7L2E3	sp|Q7L2E3|DHX30_HUMAN ATP-dependent RNA helicase DHX30 OS=Homo sapiens OX=9606 GN=DHX30 PE=1 SV=1	5	4.11885e-06	2.58758e-06	0.00459961	0.0171571	1.59178	0.670638
HSPA14	Q0VDF9	sp|Q0VDF9|HSP7E_HUMAN Heat shock 70 kDa protein 14 OS=Homo sapiens OX=9606 GN=HSPA14 PE=1 SV=1	3	1.44948e-06	9.4953e-07	0.0409024	0.0645935	1.52652	0.61025
SLC6A4	P31645	sp|P31645|SC6A4_HUMAN Sodium-dependent serotonin transporter OS=Homo sapiens OX=9606 GN=SLC6A4 PE=1 SV=1	2	2.04781e-08	3.14723e-06	0.00033949	0.00508386	0.0065067	-7.26386
EPHA2	P29317	sp|P29317|EPHA2_HUMAN Ephrin type-A receptor 2 OS=Homo sapiens OX=9606 GN=EPHA2 PE=1 SV=2	2	5.3749e-06	8.90461e-07	0.00683667	0.021705	6.03608	2.59361
ITPRID2	P28290	sp|P28290|ITPI2_HUMAN Protein ITPRID2 OS=Homo sapiens OX=9606 GN=ITPRID2 PE=1 SV=3	6	3.76211e-06	1.17577e-06	0.0303328	0.0533387	3.19969	1.67793
PRMT5	O14744	sp|O14744|ANM5_HUMAN Protein arginine N-methyltransferase 5 OS=Homo sapiens OX=9606 GN=PRMT5 PE=1 SV=4	1	3.38081e-06	2.5292e-06	0.0375221	0.0610515	1.33671	0.418688
VPS26B	Q4G0F5	sp|Q4G0F5|VP26B_HUMAN Vacuolar protein sorting-associated protein 26B OS=Homo sapiens OX=9606 GN=VPS26B PE=1 SV=2	2	2.04781e-08	3.06008e-08	0.0035013	0.0147303	0.669199	-0.579492
COL4A1	P02462	sp|P02462|CO4A1_HUMAN Collagen alpha-1(IV) chain OS=Homo sapiens OX=9606 GN=COL4A1 PE=1 SV=4;sp|P29400|CO4A5_HUMAN Collagen alpha-5(IV) chain OS=Homo sapiens OX=9606 GN=COL4A5 PE=1 SV=2	1	5.58871e-06	1.48572e-06	0.000439609	0.0057371	3.76161	1.91135
ZADH2	Q8N4Q0	sp|Q8N4Q0|PTGR3_HUMAN Prostaglandin reductase 3 OS=Homo sapiens OX=9606 GN=ZADH2 PE=1 SV=1	1	5.80535e-06	1.3221e-06	0.0279229	0.0505939	4.39101	2.13455
KIF21A	Q7Z4S6	sp|Q7Z4S6|KI21A_HUMAN Kinesin-like protein KIF21A OS=Homo sapiens OX=9606 GN=KIF21A PE=1 SV=2	2	7.74479e-06	2.62923e-07	0.000138283	0.00358132	29.4565	4.88052
PPWD1	Q96BP3	sp|Q96BP3|PPWD1_HUMAN Peptidylprolyl isomerase domain and WD repeat-containing protein 1 OS=Homo sapiens OX=9606 GN=PPWD1 PE=1 SV=1	2	2.04781e-08	2.75944e-06	0.0158891	0.0351789	0.00742109	-7.07415
RFC1	P35251	sp|P35251|RFC1_HUMAN Replication factor C subunit 1 OS=Homo sapiens OX=9606 GN=RFC1 PE=1 SV=4	2	8.98835e-07	2.8116e-06	0.00287752	0.0136358	0.319688	-1.64527
UBAC2	Q8NBM4	sp|Q8NBM4|UBAC2_HUMAN Ubiquitin-associated domain-containing protein 2 OS=Homo sapiens OX=9606 GN=UBAC2 PE=1 SV=1	1	2.04781e-08	3.06008e-08	0.0035013	0.0147303	0.669199	-0.579492
UGT2B17	O75795	sp|O75795|UDB17_HUMAN UDP-glucuronosyltransferase 2B17 OS=Homo sapiens OX=9606 GN=UGT2B17 PE=1 SV=1;sp|P36537|UDB10_HUMAN UDP-glucuronosyltransferase 2B10 OS=Homo sapiens OX=9606 GN=UGT2B10 PE=1 SV=1;sp|P54855|UDB15_HUMAN UDP-glucuronosyltransferase 2B15 O	1	5.6921e-06	3.99467e-07	0.0249053	0.0469121	14.2492	3.83281
B4GAT1	O43505	sp|O43505|B4GA1_HUMAN Beta-1,4-glucuronyltransferase 1 OS=Homo sapiens OX=9606 GN=B4GAT1 PE=1 SV=1	1	4.74043e-06	3.06008e-08	0.00472681	0.01745	154.912	7.2753
SELENBP1	Q13228	sp|Q13228|SBP1_HUMAN Methanethiol oxidase OS=Homo sapiens OX=9606 GN=SELENBP1 PE=1 SV=2	2	2.48413e-06	1.91008e-06	0.0388535	0.062446	1.30054	0.379113
RELA	Q04206	sp|Q04206|TF65_HUMAN Transcription factor p65 OS=Homo sapiens OX=9606 GN=RELA PE=1 SV=2	2	2.04781e-08	2.68472e-06	0.00477431	0.0175578	0.00762763	-7.03455
TERF2	Q15554	sp|Q15554|TERF2_HUMAN Telomeric repeat-binding factor 2 OS=Homo sapiens OX=9606 GN=TERF2 PE=1 SV=3	2	2.61986e-06	1.89188e-06	0.00531294	0.0187418	1.38479	0.46967
PLA2G15	Q8NCC3	sp|Q8NCC3|PAG15_HUMAN Group XV phospholipase A2 OS=Homo sapiens OX=9606 GN=PLA2G15 PE=1 SV=2	2	3.59995e-06	2.75975e-06	0.00811434	0.0238108	1.30445	0.383438
HSP90AB2P	Q58FF8	sp|Q58FF8|H90B2_HUMAN Putative heat shock protein HSP 90-beta 2 OS=Homo sapiens OX=9606 GN=HSP90AB2P PE=1 SV=2	1	2.04781e-08	2.52379e-06	0.0254572	0.047607	0.00811401	-6.94537
DERA	Q9Y315	sp|Q9Y315|DEOC_HUMAN Deoxyribose-phosphate aldolase OS=Homo sapiens OX=9606 GN=DERA PE=1 SV=2	1	4.02245e-06	6.80278e-07	0.0347269	0.0581925	5.91296	2.56388
GSPT1	P15170	sp|P15170|ERF3A_HUMAN Eukaryotic peptide chain release factor GTP-binding subunit ERF3A OS=Homo sapiens OX=9606 GN=GSPT1 PE=1 SV=1;sp|Q8IYD1|ERF3B_HUMAN Eukaryotic peptide chain release factor GTP-binding subunit ERF3B OS=Homo sapiens OX=9606 GN=GSPT2 PE=1	1	3.92674e-06	5.37018e-06	0.0118841	0.0295361	0.731211	-0.45164
VARS	P26640	sp|P26640|SYVC_HUMAN Valine--tRNA ligase OS=Homo sapiens OX=9606 GN=VARS PE=1 SV=4	3	3.4747e-06	1.18318e-06	0.019567	0.0402417	2.93674	1.55422
EPS15L1	Q9UBC2	sp|Q9UBC2|EP15R_HUMAN Epidermal growth factor receptor substrate 15-like 1 OS=Homo sapiens OX=9606 GN=EPS15L1 PE=1 SV=1	2	2.55011e-06	1.22967e-06	0.00720145	0.0223406	2.07381	1.05228
YLPM1	P49750	sp|P49750|YLPM1_HUMAN YLP motif-containing protein 1 OS=Homo sapiens OX=9606 GN=YLPM1 PE=1 SV=4	1	2.10059e-06	1.40351e-06	0.0289155	0.0517444	1.49667	0.581751
TXNRD1	Q16881	sp|Q16881|TRXR1_HUMAN Thioredoxin reductase 1, cytoplasmic OS=Homo sapiens OX=9606 GN=TXNRD1 PE=1 SV=3	1	3.60161e-06	7.40189e-07	0.00478384	0.0175793	4.86579	2.28267
DSC1	Q08554	sp|Q08554|DSC1_HUMAN Desmocollin-1 OS=Homo sapiens OX=9606 GN=DSC1 PE=1 SV=2	2	2.04781e-08	3.06008e-08	0.0035013	0.0147303	0.669199	-0.579492
EIF2B4	Q9UI10	sp|Q9UI10|EI2BD_HUMAN Translation initiation factor eIF-2B subunit delta OS=Homo sapiens OX=9606 GN=EIF2B4 PE=1 SV=2	1	2.26858e-06	1.75305e-06	0.000946736	0.00789249	1.29408	0.371923
COL6A1	P12109	sp|P12109|CO6A1_HUMAN Collagen alpha-1(VI) chain OS=Homo sapiens OX=9606 GN=COL6A1 PE=1 SV=3	2	4.47313e-06	2.79085e-06	0.0022752	0.0122845	1.60279	0.680582
DDX41	Q9UJV9	sp|Q9UJV9|DDX41_HUMAN Probable ATP-dependent RNA helicase DDX41 OS=Homo sapiens OX=9606 GN=DDX41 PE=1 SV=2	3	3.21538e-06	1.37047e-06	0.0229841	0.0445573	2.34619	1.23032
XYLB	O75191	sp|O75191|XYLB_HUMAN Xylulose kinase OS=Homo sapiens OX=9606 GN=XYLB PE=1 SV=3	1	2.04781e-08	2.46567e-06	0.00315922	0.0141625	0.00830527	-6.91176
DIMT1	Q9UNQ2	sp|Q9UNQ2|DIM1_HUMAN Probable dimethyladenosine transferase OS=Homo sapiens OX=9606 GN=DIMT1 PE=1 SV=1	2	2.26231e-06	5.52136e-07	0.0436377	0.0673464	4.09738	2.0347
NUDT12	Q9BQG2	sp|Q9BQG2|NUD12_HUMAN Peroxisomal NADH pyrophosphatase NUDT12 OS=Homo sapiens OX=9606 GN=NUDT12 PE=1 SV=1	2	3.77168e-06	3.06008e-08	0.000585472	0.00644965	123.254	6.94549
XAB2	Q9HCS7	sp|Q9HCS7|SYF1_HUMAN Pre-mRNA-splicing factor SYF1 OS=Homo sapiens OX=9606 GN=XAB2 PE=1 SV=2	2	2.5466e-06	1.43361e-06	0.000505141	0.00608081	1.77635	0.828919
WTAP	Q15007	sp|Q15007|FL2D_HUMAN Pre-mRNA-splicing regulator WTAP OS=Homo sapiens OX=9606 GN=WTAP PE=1 SV=2	1	1.72616e-06	4.25908e-07	0.0396955	0.0633376	4.05289	2.01895
XRN2	Q9H0D6	sp|Q9H0D6|XRN2_HUMAN 5-3 exoribonuclease 2 OS=Homo sapiens OX=9606 GN=XRN2 PE=1 SV=1	2	2.09504e-06	1.55496e-06	0.00209684	0.0118121	1.34732	0.430095
TAF2	Q6P1X5	sp|Q6P1X5|TAF2_HUMAN Transcription initiation factor TFIID subunit 2 OS=Homo sapiens OX=9606 GN=TAF2 PE=1 SV=3	3	1.09156e-06	8.73449e-07	0.00938274	0.0257787	1.24971	0.321595
EIF4G3	O43432	sp|O43432|IF4G3_HUMAN Eukaryotic translation initiation factor 4 gamma 3 OS=Homo sapiens OX=9606 GN=EIF4G3 PE=1 SV=2	2	4.36858e-07	2.16876e-06	0.00687966	0.0217814	0.201432	-2.31164
SNAP29	O95721	sp|O95721|SNP29_HUMAN Synaptosomal-associated protein 29 OS=Homo sapiens OX=9606 GN=SNAP29 PE=1 SV=1	1	2.04781e-08	3.06008e-08	0.0035013	0.0147303	0.669199	-0.579492
KDM3B	Q7LBC6	sp|Q7LBC6|KDM3B_HUMAN Lysine-specific demethylase 3B OS=Homo sapiens OX=9606 GN=KDM3B PE=1 SV=2;sp|Q9Y4C1|KDM3A_HUMAN Lysine-specific demethylase 3A OS=Homo sapiens OX=9606 GN=KDM3A PE=1 SV=4	2	2.87477e-06	3.06008e-08	0.000248404	0.00449794	93.9443	6.55373
TJP2	Q9UDY2	sp|Q9UDY2|ZO2_HUMAN Tight junction protein ZO-2 OS=Homo sapiens OX=9606 GN=TJP2 PE=1 SV=2	2	7.90755e-07	1.98042e-06	0.0497485	0.0733421	0.399287	-1.3245
LAMB2	P55268	sp|P55268|LAMB2_HUMAN Laminin subunit beta-2 OS=Homo sapiens OX=9606 GN=LAMB2 PE=1 SV=2	5	1.497e-06	2.20524e-06	0.00757954	0.0229694	0.678837	-0.558864
PLCE1	Q9P212	sp|Q9P212|PLCE1_HUMAN 1-phosphatidylinositol 4,5-bisphosphate phosphodiesterase epsilon-1 OS=Homo sapiens OX=9606 GN=PLCE1 PE=1 SV=3	2	2.04781e-08	3.06008e-08	0.0035013	0.0147303	0.669199	-0.579492
B4GALT4	O60513	sp|O60513|B4GT4_HUMAN Beta-1,4-galactosyltransferase 4 OS=Homo sapiens OX=9606 GN=B4GALT4 PE=1 SV=1	1	2.04781e-08	3.06008e-08	0.0035013	0.0147303	0.669199	-0.579492
SH3YL1	Q96HL8	sp|Q96HL8|SH3Y1_HUMAN SH3 domain-containing YSC84-like protein 1 OS=Homo sapiens OX=9606 GN=SH3YL1 PE=1 SV=1	2	2.04781e-08	3.06008e-08	0.0035013	0.0147303	0.669199	-0.579492
SVIL	O95425	sp|O95425|SVIL_HUMAN Supervillin OS=Homo sapiens OX=9606 GN=SVIL PE=1 SV=2	3	1.62723e-06	1.26466e-06	0.0166532	0.0362935	1.28669	0.363668
MED23	Q9ULK4	sp|Q9ULK4|MED23_HUMAN Mediator of RNA polymerase II transcription subunit 23 OS=Homo sapiens OX=9606 GN=MED23 PE=1 SV=2	2	1.67314e-06	5.72258e-07	0.0450466	0.068754	2.92375	1.54782
DHX16	O60231	sp|O60231|DHX16_HUMAN Pre-mRNA-splicing factor ATP-dependent RNA helicase DHX16 OS=Homo sapiens OX=9606 GN=DHX16 PE=1 SV=2	2	1.59341e-06	2.56087e-07	0.0142489	0.0326811	6.22216	2.63742
VAC14	Q08AM6	sp|Q08AM6|VAC14_HUMAN Protein VAC14 homolog OS=Homo sapiens OX=9606 GN=VAC14 PE=1 SV=1	1	1.58196e-06	1.3107e-06	0.013358	0.031555	1.20696	0.271379
APPL2	Q8NEU8	sp|Q8NEU8|DP13B_HUMAN DCC-interacting protein 13-beta OS=Homo sapiens OX=9606 GN=APPL2 PE=1 SV=3	2	2.28424e-07	3.19136e-06	0.000174936	0.00390289	0.0715757	-3.80439
PPME1	Q9Y570	sp|Q9Y570|PPME1_HUMAN Protein phosphatase methylesterase 1 OS=Homo sapiens OX=9606 GN=PPME1 PE=1 SV=3	2	2.04781e-08	3.06008e-08	0.0035013	0.0147303	0.669199	-0.579492
TP53BP1	Q12888	sp|Q12888|TP53B_HUMAN TP53-binding protein 1 OS=Homo sapiens OX=9606 GN=TP53BP1 PE=1 SV=2	3	1.37706e-06	3.06008e-08	0.0129027	0.030953	45.0008	5.49188
C9orf64	Q5T6V5	sp|Q5T6V5|QSPP_HUMAN Queuosine salvage protein OS=Homo sapiens OX=9606 GN=C9orf64 PE=1 SV=1	1	2.04781e-08	3.06008e-08	0.0035013	0.0147303	0.669199	-0.579492
TTC19	Q6DKK2	sp|Q6DKK2|TTC19_HUMAN Tetratricopeptide repeat protein 19, mitochondrial OS=Homo sapiens OX=9606 GN=TTC19 PE=1 SV=4	2	2.04781e-08	3.32539e-06	0.00315761	0.0141596	0.0061581	-7.3433
EXOC2	Q96KP1	sp|Q96KP1|EXOC2_HUMAN Exocyst complex component 2 OS=Homo sapiens OX=9606 GN=EXOC2 PE=1 SV=1	2	1.2612e-06	8.05734e-07	0.000451217	0.00580214	1.56528	0.64642
NTMT1	Q9BV86	sp|Q9BV86|NTM1A_HUMAN N-terminal Xaa-Pro-Lys N-methyltransferase 1 OS=Homo sapiens OX=9606 GN=NTMT1 PE=1 SV=3	1	2.04781e-08	3.06008e-08	0.0035013	0.0147303	0.669199	-0.579492
EP300	Q09472	sp|Q09472|EP300_HUMAN Histone acetyltransferase p300 OS=Homo sapiens OX=9606 GN=EP300 PE=1 SV=2;sp|Q92793|CBP_HUMAN CREB-binding protein OS=Homo sapiens OX=9606 GN=CREBBP PE=1 SV=3	3	9.57578e-07	2.16054e-06	0.0234643	0.0451472	0.443212	-1.17393
TGFBI	Q15582	sp|Q15582|BGH3_HUMAN Transforming growth factor-beta-induced protein ig-h3 OS=Homo sapiens OX=9606 GN=TGFBI PE=1 SV=1	2	2.42999e-06	3.06008e-08	0.000220258	0.00429853	79.4093	6.31124
PPP6R3	Q5H9R7	sp|Q5H9R7|PP6R3_HUMAN Serine/threonine-protein phosphatase 6 regulatory subunit 3 OS=Homo sapiens OX=9606 GN=PPP6R3 PE=1 SV=2	1	2.04781e-08	3.06008e-08	0.0035013	0.0147303	0.669199	-0.579492
VPS18	Q9P253	sp|Q9P253|VPS18_HUMAN Vacuolar protein sorting-associated protein 18 homolog OS=Homo sapiens OX=9606 GN=VPS18 PE=1 SV=2	2	7.74135e-07	5.66343e-07	0.019503	0.0401598	1.3669	0.450908
SCAF11	Q99590	sp|Q99590|SCAFB_HUMAN Protein SCAF11 OS=Homo sapiens OX=9606 GN=SCAF11 PE=1 SV=2	2	1.53028e-06	3.06008e-08	0.012161	0.0299313	50.0078	5.64408
ABCC4	O15439	sp|O15439|MRP4_HUMAN Multidrug resistance-associated protein 4 OS=Homo sapiens OX=9606 GN=ABCC4 PE=1 SV=3	1	6.67714e-07	5.05679e-07	0.00938218	0.0257779	1.32043	0.401007
SPTBN4	Q9H254	sp|Q9H254|SPTN4_HUMAN Spectrin beta chain, non-erythrocytic 4 OS=Homo sapiens OX=9606 GN=SPTBN4 PE=1 SV=2	2	9.05914e-07	6.49674e-07	0.000393691	0.00545965	1.39441	0.479658
DDX28	Q9NUL7	sp|Q9NUL7|DDX28_HUMAN Probable ATP-dependent RNA helicase DDX28 OS=Homo sapiens OX=9606 GN=DDX28 PE=1 SV=2	1	1.06453e-06	3.49975e-07	0.0442544	0.0679498	3.04172	1.60489
MYCBP2	O75592	sp|O75592|MYCB2_HUMAN E3 ubiquitin-protein ligase MYCBP2 OS=Homo sapiens OX=9606 GN=MYCBP2 PE=1 SV=4	2	2.04781e-08	3.06008e-08	0.0035013	0.0147303	0.669199	-0.579492
VWA8	A3KMH1	sp|A3KMH1|VWA8_HUMAN von Willebrand factor A domain-containing protein 8 OS=Homo sapiens OX=9606 GN=VWA8 PE=1 SV=2	2	7.09698e-07	1.22197e-07	0.00690568	0.0218275	5.80784	2.538
TTN	Q8WZ42	sp|Q8WZ42|TITIN_HUMAN Titin OS=Homo sapiens OX=9606 GN=TTN PE=1 SV=4	5	6.35389e-08	1.73253e-07	0.0337674	0.0571712	0.36674	-1.44717
TRRAP	Q9Y4A5	sp|Q9Y4A5|TRRAP_HUMAN Transformation/transcription domain-associated protein OS=Homo sapiens OX=9606 GN=TRRAP PE=1 SV=3	3	5.52834e-07	1.05402e-07	0.0004319	0.00569282	5.24502	2.39095
DST	Q03001	sp|Q03001|DYST_HUMAN Dystonin OS=Homo sapiens OX=9606 GN=DST PE=1 SV=4	2	1.77756e-07	4.07397e-07	0.0343734	0.0578187	0.436321	-1.19654
PTPRA	P18433	sp|P18433|PTPRA_HUMAN Receptor-type tyrosine-protein phosphatase alpha OS=Homo sapiens OX=9606 GN=PTPRA PE=1 SV=3	2	2.04781e-08	3.06008e-08	0.0035013	0.0147303	0.669199	-0.579492
SIPA1L1	O43166	sp|O43166|SI1L1_HUMAN Signal-induced proliferation-associated 1-like protein 1 OS=Homo sapiens OX=9606 GN=SIPA1L1 PE=1 SV=4	2	2.04781e-08	3.06008e-08	0.0035013	0.0147303	0.669199	-0.579492

## Sheet: DON Vs control
Gene	Accession	Description	Unique peptides	MEAN C	MEAN A	P-VALUE	Q-VALUE	FOLD CHANGE	LOG_FOLDCHANGE
HIST2H3A	Q71DI3	sp|Q71DI3|H32_HUMAN Histone H3.2 OS=Homo sapiens OX=9606 GN=HIST2H3A PE=1 SV=3	1	0.0886882	0.07178	0.00126188	0.00281192	1.23556	0.305161
HSPE1	P61604	sp|P61604|CH10_HUMAN 10 kDa heat shock protein, mitochondrial OS=Homo sapiens OX=9606 GN=HSPE1 PE=1 SV=2	11	0.00701931	0.00998628	2.7063e-05	0.000379289	0.702896	-0.508618
KRT18	P05783	sp|P05783|K1C18_HUMAN Keratin, type I cytoskeletal 18 OS=Homo sapiens OX=9606 GN=KRT18 PE=1 SV=2	23	0.00856128	0.00343884	2.81823e-08	9.73398e-06	2.48958	1.3159
SLC2A3	P11169	sp|P11169|GTR3_HUMAN Solute carrier family 2, facilitated glucose transporter member 3 OS=Homo sapiens OX=9606 GN=SLC2A3 PE=1 SV=1;sp|Q8TDB8|GTR14_HUMAN Solute carrier family 2, facilitated glucose transporter member 14 OS=Homo sapiens OX=9606 GN=SLC2A14 P	11	0.00392937	0.0051075	0.0393499	0.0285916	0.769334	-0.378318
H3F3A	P84243	sp|P84243|H33_HUMAN Histone H3.3 OS=Homo sapiens OX=9606 GN=H3F3A PE=1 SV=2	1	0.0095072	0.00274902	0.00266283	0.00449002	3.4584	1.7901
H2AFV	Q71UI9	sp|Q71UI9|H2AV_HUMAN Histone H2A.V OS=Homo sapiens OX=9606 GN=H2AFV PE=1 SV=3;sp|P0C0S5|H2AZ_HUMAN Histone H2A.Z OS=Homo sapiens OX=9606 GN=H2AFZ PE=1 SV=2	3	0.00577536	0.00312305	2.68607e-05	0.000378045	1.84927	0.886956
MDH2	P40926	sp|P40926|MDHM_HUMAN Malate dehydrogenase, mitochondrial OS=Homo sapiens OX=9606 GN=MDH2 PE=1 SV=3	19	0.00341291	0.00507196	3.46628e-05	0.000424675	0.672898	-0.571541
LGALS3	P17931	sp|P17931|LEG3_HUMAN Galectin-3 OS=Homo sapiens OX=9606 GN=LGALS3 PE=1 SV=5	12	0.00441628	0.00283736	0.000915386	0.00229089	1.55648	0.638284
CKB	P12277	sp|P12277|KCRB_HUMAN Creatine kinase B-type OS=Homo sapiens OX=9606 GN=CKB PE=1 SV=1	22	0.00424646	0.00321807	0.000827721	0.00214355	1.31957	0.400066
GAPDH	P04406	sp|P04406|G3P_HUMAN Glyceraldehyde-3-phosphate dehydrogenase OS=Homo sapiens OX=9606 GN=GAPDH PE=1 SV=3	18	0.00366407	0.00272963	0.0017977	0.00347882	1.34233	0.424741
RPLP1	P05386	sp|P05386|RLA1_HUMAN 60S acidic ribosomal protein P1 OS=Homo sapiens OX=9606 GN=RPLP1 PE=1 SV=1	3	0.0036114	0.00295391	0.00456627	0.00638663	1.22258	0.289929
PDIA3	P30101	sp|P30101|PDIA3_HUMAN Protein disulfide-isomerase A3 OS=Homo sapiens OX=9606 GN=PDIA3 PE=1 SV=4	30	0.00255205	0.00319644	1.16361e-05	0.000255618	0.798403	-0.32481
PDIA6	Q15084	sp|Q15084|PDIA6_HUMAN Protein disulfide-isomerase A6 OS=Homo sapiens OX=9606 GN=PDIA6 PE=1 SV=1	17	0.00230451	0.00305741	0.00175022	0.00342607	0.753747	-0.407848
ETFA	P13804	sp|P13804|ETFA_HUMAN Electron transfer flavoprotein subunit alpha, mitochondrial OS=Homo sapiens OX=9606 GN=ETFA PE=1 SV=1	18	0.0021276	0.0029633	0.00109702	0.00257904	0.717982	-0.477979
HIST1H3A	P68431	sp|P68431|H31_HUMAN Histone H3.1 OS=Homo sapiens OX=9606 GN=HIST1H3A PE=1 SV=2;sp|Q16695|H31T_HUMAN Histone H3.1t OS=Homo sapiens OX=9606 GN=HIST3H3 PE=1 SV=3	1	0.00409539	0.00280099	0.00296449	0.00481357	1.46212	0.548066
ANXA4	P09525	sp|P09525|ANXA4_HUMAN Annexin A4 OS=Homo sapiens OX=9606 GN=ANXA4 PE=1 SV=4	24	0.00293978	0.00218467	0.000563502	0.00172619	1.34564	0.428293
ETFB	P38117	sp|P38117|ETFB_HUMAN Electron transfer flavoprotein subunit beta OS=Homo sapiens OX=9606 GN=ETFB PE=1 SV=3	16	0.0019652	0.00297059	1.64666e-05	0.000298234	0.661554	-0.59607
CISD1	Q9NZ45	sp|Q9NZ45|CISD1_HUMAN CDGSH iron-sulfur domain-containing protein 1 OS=Homo sapiens OX=9606 GN=CISD1 PE=1 SV=1	6	0.00318051	0.00166355	0.0012619	0.00281194	1.91188	0.934995
HMGN2	P05204	sp|P05204|HMGN2_HUMAN Non-histone chromosomal protein HMG-17 OS=Homo sapiens OX=9606 GN=HMGN2 PE=1 SV=3;sp|Q15651|HMGN3_HUMAN High mobility group nucleosome-binding domain-containing protein 3 OS=Homo sapiens OX=9606 GN=HMGN3 PE=1 SV=2	4	0.000944045	0.00372905	0.00374429	0.00563804	0.25316	-1.98188
RPN2	P04844	sp|P04844|RPN2_HUMAN Dolichyl-diphosphooligosaccharide--protein glycosyltransferase subunit 2 OS=Homo sapiens OX=9606 GN=RPN2 PE=1 SV=3	24	0.00255877	0.00186946	0.00615818	0.00770093	1.36872	0.452829
HNRNPA2B1	P22626	sp|P22626|ROA2_HUMAN Heterogeneous nuclear ribonucleoproteins A2/B1 OS=Homo sapiens OX=9606 GN=HNRNPA2B1 PE=1 SV=2	19	0.00176763	0.0023212	4.01334e-05	0.000452016	0.761518	-0.393051
ENO1	P06733	sp|P06733|ENOA_HUMAN Alpha-enolase OS=Homo sapiens OX=9606 GN=ENO1 PE=1 SV=2	18	0.00197353	0.00239311	0.00605366	0.00761071	0.824673	-0.278106
S100A6	P06703	sp|P06703|S10A6_HUMAN Protein S100-A6 OS=Homo sapiens OX=9606 GN=S100A6 PE=1 SV=1	5	0.00189822	0.00241756	0.000504912	0.0016283	0.785181	-0.348904
TUBB4B	P68371	sp|P68371|TBB4B_HUMAN Tubulin beta-4B chain OS=Homo sapiens OX=9606 GN=TUBB4B PE=1 SV=1;sp|P04350|TBB4A_HUMAN Tubulin beta-4A chain OS=Homo sapiens OX=9606 GN=TUBB4A PE=1 SV=2	3	0.00324203	0.00142355	0.000863628	0.00220442	2.27743	1.18741
LRRC59	Q96AG4	sp|Q96AG4|LRC59_HUMAN Leucine-rich repeat-containing protein 59 OS=Homo sapiens OX=9606 GN=LRRC59 PE=1 SV=1	14	0.00171745	0.00224101	0.000494767	0.00161064	0.766373	-0.383881
ATP5PF	P18859	sp|P18859|ATP5J_HUMAN ATP synthase-coupling factor 6, mitochondrial OS=Homo sapiens OX=9606 GN=ATP5PF PE=1 SV=1	6	0.0018113	0.00221973	0.00608195	0.00763523	0.816004	-0.293352
HSPA5	P11021	sp|P11021|BIP_HUMAN Endoplasmic reticulum chaperone BiP OS=Homo sapiens OX=9606 GN=HSPA5 PE=1 SV=2	28	0.00158854	0.00240774	0.0149284	0.0141558	0.659765	-0.599977
PPIA	P62937	sp|P62937|PPIA_HUMAN Peptidyl-prolyl cis-trans isomerase A OS=Homo sapiens OX=9606 GN=PPIA PE=1 SV=2	11	0.00214539	0.00174803	0.00982388	0.0105957	1.22732	0.295507
HADHB	P55084	sp|P55084|ECHB_HUMAN Trifunctional enzyme subunit beta, mitochondrial OS=Homo sapiens OX=9606 GN=HADHB PE=1 SV=3	26	0.00207556	0.00164623	0.00113544	0.00263557	1.2608	0.334336
COX5B	P10606	sp|P10606|COX5B_HUMAN Cytochrome c oxidase subunit 5B, mitochondrial OS=Homo sapiens OX=9606 GN=COX5B PE=1 SV=2	6	0.00160141	0.00210031	0.0024129	0.0042208	0.762462	-0.391262
EEF1A1P5	Q5VTE0	sp|Q5VTE0|EF1A3_HUMAN Putative elongation factor 1-alpha-like 3 OS=Homo sapiens OX=9606 GN=EEF1A1P5 PE=5 SV=1;sp|P68104|EF1A1_HUMAN Elongation factor 1-alpha 1 OS=Homo sapiens OX=9606 GN=EEF1A1 PE=1 SV=1	18	0.00212818	0.00156208	0.00687233	0.00829257	1.3624	0.446155
SLC25A3	Q00325	sp|Q00325|MPCP_HUMAN Phosphate carrier protein, mitochondrial OS=Homo sapiens OX=9606 GN=SLC25A3 PE=1 SV=2	13	0.0015814	0.00199994	0.0031259	0.00499466	0.790722	-0.338757
MARCKS	P29966	sp|P29966|MARCS_HUMAN Myristoylated alanine-rich C-kinase substrate OS=Homo sapiens OX=9606 GN=MARCKS PE=1 SV=4	11	0.00139708	0.00206704	0.00213427	0.0038959	0.675886	-0.565148
GSTA2	P09210	sp|P09210|GSTA2_HUMAN Glutathione S-transferase A2 OS=Homo sapiens OX=9606 GN=GSTA2 PE=1 SV=4;sp|P08263|GSTA1_HUMAN Glutathione S-transferase A1 OS=Homo sapiens OX=9606 GN=GSTA1 PE=1 SV=3;sp|Q16772|GSTA3_HUMAN Glutathione S-transferase A3 OS=Homo sapiens O	12	0.00195292	0.00144799	0.00169264	0.00336044	1.34871	0.43158
FAM162A	Q96A26	sp|Q96A26|F162A_HUMAN Protein FAM162A OS=Homo sapiens OX=9606 GN=FAM162A PE=1 SV=2	6	0.00145008	0.00176898	0.00197608	0.00369852	0.819723	-0.286792
HIGD1A	Q9Y241	sp|Q9Y241|HIG1A_HUMAN HIG1 domain family member 1A, mitochondrial OS=Homo sapiens OX=9606 GN=HIGD1A PE=1 SV=1	5	0.00137851	0.00206948	0.00413566	0.00600827	0.666113	-0.58616
RPL22	P35268	sp|P35268|RL22_HUMAN 60S ribosomal protein L22 OS=Homo sapiens OX=9606 GN=RPL22 PE=1 SV=2	3	0.00195243	0.00135935	0.000301925	0.00122525	1.4363	0.522355
CALR	P27797	sp|P27797|CALR_HUMAN Calreticulin OS=Homo sapiens OX=9606 GN=CALR PE=1 SV=1	18	0.00108539	0.00190534	0.00163308	0.00329068	0.569657	-0.811835
LDHA	P00338	sp|P00338|LDHA_HUMAN L-lactate dehydrogenase A chain OS=Homo sapiens OX=9606 GN=LDHA PE=1 SV=2	21	0.00170149	0.0013318	0.00929375	0.0102065	1.27759	0.35342
HSP90B1	P14625	sp|P14625|ENPL_HUMAN Endoplasmin OS=Homo sapiens OX=9606 GN=HSP90B1 PE=1 SV=1	39	0.00108913	0.00156911	7.31567e-05	0.000578874	0.694103	-0.526778
HMGB1	P09429	sp|P09429|HMGB1_HUMAN High mobility group protein B1 OS=Homo sapiens OX=9606 GN=HMGB1 PE=1 SV=3	8	0.00216782	0.000836179	0.00159405	0.00324395	2.59253	1.37436
HSPA9	P38646	sp|P38646|GRP75_HUMAN Stress-70 protein, mitochondrial OS=Homo sapiens OX=9606 GN=HSPA9 PE=1 SV=2	36	0.00094923	0.00171745	5.45336e-05	0.000516514	0.552698	-0.855436
P4HB	P07237	sp|P07237|PDIA1_HUMAN Protein disulfide-isomerase OS=Homo sapiens OX=9606 GN=P4HB PE=1 SV=3	30	0.00107487	0.00159669	1.08421e-06	9.77329e-05	0.673187	-0.570921
RPS14	P62263	sp|P62263|RS14_HUMAN 40S ribosomal protein S14 OS=Homo sapiens OX=9606 GN=RPS14 PE=1 SV=3	5	0.00164724	0.00111931	0.000119862	0.00076087	1.47165	0.557432
SUCLG1	P53597	sp|P53597|SUCA_HUMAN Succinate--CoA ligase [ADP/GDP-forming] subunit alpha, mitochondrial OS=Homo sapiens OX=9606 GN=SUCLG1 PE=1 SV=4	10	0.00102439	0.00166982	3.63504e-05	0.000433363	0.613471	-0.704934
H2AFY	O75367	sp|O75367|H2AY_HUMAN Core histone macro-H2A.1 OS=Homo sapiens OX=9606 GN=H2AFY PE=1 SV=4	15	0.00139264	0.00105986	0.000170423	0.000910252	1.31398	0.393943
CANX	P27824	sp|P27824|CALX_HUMAN Calnexin OS=Homo sapiens OX=9606 GN=CANX PE=1 SV=2	29	0.00106323	0.00134719	0.00963295	0.0104572	0.789219	-0.341502
LMNB1	P20700	sp|P20700|LMNB1_HUMAN Lamin-B1 OS=Homo sapiens OX=9606 GN=LMNB1 PE=1 SV=2	35	0.00142984	0.00114987	0.000815941	0.00212319	1.24347	0.314377
DHCR7	Q9UBM7	sp|Q9UBM7|DHCR7_HUMAN 7-dehydrocholesterol reductase OS=Homo sapiens OX=9606 GN=DHCR7 PE=1 SV=1	8	0.00100809	0.00147743	0.028402	0.0224834	0.682324	-0.551471
ATP5MF	P56134	sp|P56134|ATPK_HUMAN ATP synthase subunit f, mitochondrial OS=Homo sapiens OX=9606 GN=ATP5MF PE=1 SV=3	4	0.00179304	0.00107009	0.0224772	0.018899	1.6756	0.744681
COX6B1	P14854	sp|P14854|CX6B1_HUMAN Cytochrome c oxidase subunit 6B1 OS=Homo sapiens OX=9606 GN=COX6B1 PE=1 SV=2	8	0.000998977	0.00161498	0.000612351	0.00180421	0.618569	-0.692994
BANF1	O75531	sp|O75531|BAF_HUMAN Barrier-to-autointegration factor OS=Homo sapiens OX=9606 GN=BANF1 PE=1 SV=1	4	0.00128008	0.000886507	0.00443084	0.00627071	1.44396	0.530028
RPL7A	P62424	sp|P62424|RL7A_HUMAN 60S ribosomal protein L7a OS=Homo sapiens OX=9606 GN=RPL7A PE=1 SV=2	15	0.00135712	0.00100456	0.0373675	0.0275349	1.35096	0.433988
ACOT13	Q9NPJ3	sp|Q9NPJ3|ACO13_HUMAN Acyl-coenzyme A thioesterase 13 OS=Homo sapiens OX=9606 GN=ACOT13 PE=1 SV=1	4	0.00101565	0.00127393	5.5501e-06	0.000198153	0.797257	-0.326883
MTCH2	Q9Y6C9	sp|Q9Y6C9|MTCH2_HUMAN Mitochondrial carrier homolog 2 OS=Homo sapiens OX=9606 GN=MTCH2 PE=1 SV=1	11	0.0015696	0.000806988	0.00184532	0.00353054	1.94501	0.959778
SNRPF	P62306	sp|P62306|RUXF_HUMAN Small nuclear ribonucleoprotein F OS=Homo sapiens OX=9606 GN=SNRPF PE=1 SV=1	4	0.00173202	0.000866468	2.65083e-06	0.000144496	1.99894	0.999236
VIL1	P09327	sp|P09327|VILI_HUMAN Villin-1 OS=Homo sapiens OX=9606 GN=VIL1 PE=1 SV=4	36	0.00123519	0.00101646	0.0186999	0.0165112	1.21519	0.281181
MYL6	P60660	sp|P60660|MYL6_HUMAN Myosin light polypeptide 6 OS=Homo sapiens OX=9606 GN=MYL6 PE=1 SV=2	7	0.00141867	0.000974237	0.00028993	0.00120235	1.45619	0.542196
HMGB2	P26583	sp|P26583|HMGB2_HUMAN High mobility group protein B2 OS=Homo sapiens OX=9606 GN=HMGB2 PE=1 SV=2	5	0.00122815	0.000904465	0.00725448	0.00859244	1.35788	0.441355
ACTC1	P68032	sp|P68032|ACTC_HUMAN Actin, alpha cardiac muscle 1 OS=Homo sapiens OX=9606 GN=ACTC1 PE=1 SV=1;sp|P63267|ACTH_HUMAN Actin, gamma-enteric smooth muscle OS=Homo sapiens OX=9606 GN=ACTG2 PE=1 SV=1;sp|P62736|ACTA_HUMAN Actin, aortic smooth muscle OS=Homo sapien	1	0.00171604	0.000650371	0.0495435	0.0338647	2.63856	1.39975
CES1	P23141	sp|P23141|EST1_HUMAN Liver carboxylesterase 1 OS=Homo sapiens OX=9606 GN=CES1 PE=1 SV=2	27	0.00102271	0.00130534	0.000340707	0.00131227	0.783482	-0.352027
SUCLG2	Q96I99	sp|Q96I99|SUCB2_HUMAN Succinate--CoA ligase [GDP-forming] subunit beta, mitochondrial OS=Homo sapiens OX=9606 GN=SUCLG2 PE=1 SV=2	22	0.000767733	0.00132847	4.47146e-05	0.000473873	0.577907	-0.791092
SUB1	P53999	sp|P53999|TCP4_HUMAN Activated RNA polymerase II transcriptional coactivator p15 OS=Homo sapiens OX=9606 GN=SUB1 PE=1 SV=3	6	0.00122578	0.000887101	0.00014171	0.000830605	1.38178	0.466532
CYB5R3	P00387	sp|P00387|NB5R3_HUMAN NADH-cytochrome b5 reductase 3 OS=Homo sapiens OX=9606 GN=CYB5R3 PE=1 SV=3	13	0.00120569	0.000964978	0.00100381	0.00243567	1.24944	0.321284
SLC2A5	P22732	sp|P22732|GTR5_HUMAN Solute carrier family 2, facilitated glucose transporter member 5 OS=Homo sapiens OX=9606 GN=SLC2A5 PE=1 SV=1	10	0.000800833	0.00101808	0.0429865	0.0304573	0.786613	-0.346274
CHCHD2	Q9Y6H1	sp|Q9Y6H1|CHCH2_HUMAN Coiled-coil-helix-coiled-coil-helix domain-containing protein 2 OS=Homo sapiens OX=9606 GN=CHCHD2 PE=1 SV=1;sp|Q5T1J5|CHCH9_HUMAN Putative coiled-coil-helix-coiled-coil-helix domain-containing protein CHCHD2P9, mitochondrial OS=Homo s	5	0.000411926	0.00184114	1.22412e-06	0.000103129	0.223734	-2.16015
SPTAN1	Q13813	sp|Q13813|SPTN1_HUMAN Spectrin alpha chain, non-erythrocytic 1 OS=Homo sapiens OX=9606 GN=SPTAN1 PE=1 SV=3	146	0.00114259	0.000915909	0.000257264	0.00113632	1.24749	0.319033
ATP5EP2	Q5VTU8	sp|Q5VTU8|AT5EL_HUMAN ATP synthase subunit epsilon-like protein, mitochondrial OS=Homo sapiens OX=9606 GN=ATP5EP2 PE=3 SV=1;sp|P56381|ATP5E_HUMAN ATP synthase subunit epsilon, mitochondrial OS=Homo sapiens OX=9606 GN=ATP5F1E PE=1 SV=2	2	0.000816143	0.00136333	0.000287869	0.00119842	0.598638	-0.740243
SFXN1	Q9H9B4	sp|Q9H9B4|SFXN1_HUMAN Sideroflexin-1 OS=Homo sapiens OX=9606 GN=SFXN1 PE=1 SV=4	13	0.00108936	0.000848506	0.0013382	0.00291313	1.28386	0.360488
UQCRC2	P22695	sp|P22695|QCR2_HUMAN Cytochrome b-c1 complex subunit 2, mitochondrial OS=Homo sapiens OX=9606 GN=UQCRC2 PE=1 SV=3	19	0.000826924	0.00111129	0.00187987	0.00357352	0.74411	-0.426412
PRDX3	P30048	sp|P30048|PRDX3_HUMAN Thioredoxin-dependent peroxide reductase, mitochondrial OS=Homo sapiens OX=9606 GN=PRDX3 PE=1 SV=3	11	0.000896192	0.00112834	0.0331786	0.0252085	0.794256	-0.332323
SDHB	P21912	sp|P21912|SDHB_HUMAN Succinate dehydrogenase [ubiquinone] iron-sulfur subunit, mitochondrial OS=Homo sapiens OX=9606 GN=SDHB PE=1 SV=3	13	0.000816223	0.000987153	0.00505722	0.00678502	0.826846	-0.27431
PDIA4	P13667	sp|P13667|PDIA4_HUMAN Protein disulfide-isomerase A4 OS=Homo sapiens OX=9606 GN=PDIA4 PE=1 SV=2	33	0.000787647	0.00110805	0.000185569	0.000956254	0.710843	-0.492397
VAPB	O95292	sp|O95292|VAPB_HUMAN Vesicle-associated membrane protein-associated protein B/C OS=Homo sapiens OX=9606 GN=VAPB PE=1 SV=3	12	0.000832075	0.00104612	0.00194669	0.00366075	0.795393	-0.33026
PRKCSH	P14314	sp|P14314|GLU2B_HUMAN Glucosidase 2 subunit beta OS=Homo sapiens OX=9606 GN=PRKCSH PE=1 SV=2	13	0.000699878	0.00107478	0.000268481	0.00115994	0.651182	-0.618868
RPL13A	P40429	sp|P40429|RL13A_HUMAN 60S ribosomal protein L13a OS=Homo sapiens OX=9606 GN=RPL13A PE=1 SV=2;sp|Q6NVV1|R13P3_HUMAN Putative 60S ribosomal protein L13a protein RPL13AP3 OS=Homo sapiens OX=9606 GN=RPL13AP3 PE=5 SV=1	8	0.00106556	0.000686754	7.57718e-05	0.000586025	1.55158	0.633741
ATP5PB	P24539	sp|P24539|AT5F1_HUMAN ATP synthase F(0) complex subunit B1, mitochondrial OS=Homo sapiens OX=9606 GN=ATP5PB PE=1 SV=2	9	0.000795526	0.00102556	0.005445	0.00707744	0.775702	-0.366426
ACSF2	Q96CM8	sp|Q96CM8|ACSF2_HUMAN Acyl-CoA synthetase family member 2, mitochondrial OS=Homo sapiens OX=9606 GN=ACSF2 PE=1 SV=2	19	0.000693983	0.0011265	1.87897e-05	0.000318108	0.616051	-0.698879
ANXA5	P08758	sp|P08758|ANXA5_HUMAN Annexin A5 OS=Homo sapiens OX=9606 GN=ANXA5 PE=1 SV=2	18	0.00110226	0.000717595	0.000269956	0.00116297	1.53605	0.619228
HMGCS2	P54868	sp|P54868|HMCS2_HUMAN Hydroxymethylglutaryl-CoA synthase, mitochondrial OS=Homo sapiens OX=9606 GN=HMGCS2 PE=1 SV=1	18	0.000650111	0.00103822	1.77652e-05	0.000309054	0.626181	-0.675347
FN1	P02751	sp|P02751|FINC_HUMAN Fibronectin OS=Homo sapiens OX=9606 GN=FN1 PE=1 SV=4	64	0.000296676	0.000580557	3.73688e-05	0.000438383	0.511019	-0.96855
RPS25	P62851	sp|P62851|RS25_HUMAN 40S ribosomal protein S25 OS=Homo sapiens OX=9606 GN=RPS25 PE=1 SV=1	4	0.000960846	0.000685527	0.0011715	0.00268735	1.40162	0.487091
RPL7	P18124	sp|P18124|RL7_HUMAN 60S ribosomal protein L7 OS=Homo sapiens OX=9606 GN=RPL7 PE=1 SV=1	13	0.000964678	0.000722499	0.000536362	0.00168098	1.3352	0.417051
HKDC1	Q2TB90	sp|Q2TB90|HKDC1_HUMAN Putative hexokinase HKDC1 OS=Homo sapiens OX=9606 GN=HKDC1 PE=1 SV=3	42	0.00074204	0.000915636	0.00399201	0.00587544	0.810409	-0.303278
MGST1	P10620	sp|P10620|MGST1_HUMAN Microsomal glutathione S-transferase 1 OS=Homo sapiens OX=9606 GN=MGST1 PE=1 SV=1	5	0.00098356	0.00073517	0.000804954	0.00210403	1.33787	0.419935
OAT	P04181	sp|P04181|OAT_HUMAN Ornithine aminotransferase, mitochondrial OS=Homo sapiens OX=9606 GN=OAT PE=1 SV=1	17	0.00059294	0.00109156	0.000841344	0.00216685	0.543205	-0.880431
NONO	Q15233	sp|Q15233|NONO_HUMAN Non-POU domain-containing octamer-binding protein OS=Homo sapiens OX=9606 GN=NONO PE=1 SV=4	24	0.000903316	0.000728838	0.0113874	0.0117107	1.23939	0.309632
DLD	P09622	sp|P09622|DLDH_HUMAN Dihydrolipoyl dehydrogenase, mitochondrial OS=Homo sapiens OX=9606 GN=DLD PE=1 SV=2	14	0.00076414	0.000995057	0.00010889	0.000721293	0.767936	-0.380942
GSTK1	Q9Y2Q3	sp|Q9Y2Q3|GSTK1_HUMAN Glutathione S-transferase kappa 1 OS=Homo sapiens OX=9606 GN=GSTK1 PE=1 SV=3	11	0.000734007	0.000964383	0.00100348	0.00243515	0.761116	-0.393812
NDUFAF2	Q8N183	sp|Q8N183|NDUF2_HUMAN NADH dehydrogenase [ubiquinone] 1 alpha subcomplex assembly factor 2 OS=Homo sapiens OX=9606 GN=NDUFAF2 PE=1 SV=1	5	0.00075563	0.000991114	0.034987	0.026226	0.762405	-0.39137
HMGA1	P17096	sp|P17096|HMGA1_HUMAN High mobility group protein HMG-I/HMG-Y OS=Homo sapiens OX=9606 GN=HMGA1 PE=1 SV=3	7	0.00107606	0.000618575	0.000503368	0.00162563	1.73957	0.798734
LDHB	P07195	sp|P07195|LDHB_HUMAN L-lactate dehydrogenase B chain OS=Homo sapiens OX=9606 GN=LDHB PE=1 SV=2	14	0.0010147	0.000717443	0.000281799	0.00118668	1.41432	0.500113
RPS8	P62241	sp|P62241|RS8_HUMAN 40S ribosomal protein S8 OS=Homo sapiens OX=9606 GN=RPS8 PE=1 SV=2	7	0.000946126	0.00070095	0.000189387	0.000967343	1.34978	0.432721
ERO1A	Q96HE7	sp|Q96HE7|ERO1A_HUMAN ERO1-like protein alpha OS=Homo sapiens OX=9606 GN=ERO1A PE=1 SV=2	17	0.000636678	0.000920014	0.000481306	0.0015867	0.692031	-0.531092
SLC25A13	Q9UJS0	sp|Q9UJS0|CMC2_HUMAN Calcium-binding mitochondrial carrier protein Aralar2 OS=Homo sapiens OX=9606 GN=SLC25A13 PE=1 SV=2	24	0.000870733	0.000694769	0.00330791	0.00519206	1.25327	0.325697
CTSB	P07858	sp|P07858|CATB_HUMAN Cathepsin B OS=Homo sapiens OX=9606 GN=CTSB PE=1 SV=3	9	0.00061918	0.000943194	0.0276866	0.0220555	0.656472	-0.607195
RPS20	P60866	sp|P60866|RS20_HUMAN 40S ribosomal protein S20 OS=Homo sapiens OX=9606 GN=RPS20 PE=1 SV=1	4	0.00093255	0.000634141	0.000338278	0.00130703	1.47057	0.556379
RPL13	P26373	sp|P26373|RL13_HUMAN 60S ribosomal protein L13 OS=Homo sapiens OX=9606 GN=RPL13 PE=1 SV=4	7	0.00101473	0.000592863	0.000631849	0.00183371	1.71158	0.775329
METTL7B	Q6UX53	sp|Q6UX53|MET7B_HUMAN Methyltransferase-like protein 7B OS=Homo sapiens OX=9606 GN=METTL7B PE=1 SV=2	7	0.000815663	0.000635483	0.00343668	0.00532755	1.28353	0.36012
FUS	P35637	sp|P35637|FUS_HUMAN RNA-binding protein FUS OS=Homo sapiens OX=9606 GN=FUS PE=1 SV=1	6	0.000861264	0.000621006	0.0337953	0.0255536	1.38689	0.471848
APEX1	P27695	sp|P27695|APEX1_HUMAN DNA-(apurinic or apyrimidinic site) lyase OS=Homo sapiens OX=9606 GN=APEX1 PE=1 SV=2	14	0.000832057	0.000623054	0.00116618	0.00267978	1.33545	0.417326
EZR	P15311	sp|P15311|EZRI_HUMAN Ezrin OS=Homo sapiens OX=9606 GN=EZR PE=1 SV=4	19	0.000889078	0.000658226	0.00508948	0.00681006	1.35072	0.433726
ALDH18A1	P54886	sp|P54886|P5CS_HUMAN Delta-1-pyrroline-5-carboxylate synthase OS=Homo sapiens OX=9606 GN=ALDH18A1 PE=1 SV=2	40	0.000496125	0.000882046	1.20274e-05	0.000258345	0.562471	-0.83015
ECI1	P42126	sp|P42126|ECI1_HUMAN Enoyl-CoA delta isomerase 1, mitochondrial OS=Homo sapiens OX=9606 GN=ECI1 PE=1 SV=1	9	0.000551448	0.000851344	0.000376642	0.00138602	0.647739	-0.626516
MIC13	Q5XKP0	sp|Q5XKP0|MIC13_HUMAN MICOS complex subunit MIC13 OS=Homo sapiens OX=9606 GN=MIC13 PE=1 SV=1	4	0.000831511	0.000658452	0.0147986	0.0140684	1.26283	0.336657
RPS6	P62753	sp|P62753|RS6_HUMAN 40S ribosomal protein S6 OS=Homo sapiens OX=9606 GN=RPS6 PE=1 SV=1	4	0.000829951	0.000581644	0.0188016	0.0165702	1.4269	0.512889
BCAP31	P51572	sp|P51572|BAP31_HUMAN B-cell receptor-associated protein 31 OS=Homo sapiens OX=9606 GN=BCAP31 PE=1 SV=3	13	0.000496023	0.00087384	0.000388215	0.00140839	0.567636	-0.816962
HMGA2	P52926	sp|P52926|HMGA2_HUMAN High mobility group protein HMGI-C OS=Homo sapiens OX=9606 GN=HMGA2 PE=1 SV=1	5	0.000551433	0.000869444	0.00116523	0.00267843	0.634235	-0.65691
RPS7	P62081	sp|P62081|RS7_HUMAN 40S ribosomal protein S7 OS=Homo sapiens OX=9606 GN=RPS7 PE=1 SV=1	10	0.00102316	0.000580365	7.57806e-06	0.00022092	1.76296	0.818003
TMEM256	Q8N2U0	sp|Q8N2U0|TM256_HUMAN Transmembrane protein 256 OS=Homo sapiens OX=9606 GN=TMEM256 PE=3 SV=1	3	0.000808457	0.000562015	0.0359861	0.0267808	1.4385	0.524562
PLIN2	Q99541	sp|Q99541|PLIN2_HUMAN Perilipin-2 OS=Homo sapiens OX=9606 GN=PLIN2 PE=1 SV=2	19	0.000828626	0.000586856	0.00451014	0.00633892	1.41197	0.497714
SFPQ	P23246	sp|P23246|SFPQ_HUMAN Splicing factor, proline- and glutamine-rich OS=Homo sapiens OX=9606 GN=SFPQ PE=1 SV=2	22	0.000741523	0.000554843	0.00153031	0.00316563	1.33646	0.418413
RPL23	P62829	sp|P62829|RL23_HUMAN 60S ribosomal protein L23 OS=Homo sapiens OX=9606 GN=RPL23 PE=1 SV=1	5	0.000745389	0.000596108	0.0443815	0.0311672	1.25043	0.322421
SET	Q01105	sp|Q01105|SET_HUMAN Protein SET OS=Homo sapiens OX=9606 GN=SET PE=1 SV=3;sp|P0DME0|SETLP_HUMAN Protein SETSIP OS=Homo sapiens OX=9606 GN=SETSIP PE=1 SV=1	6	0.000751672	0.000577983	0.0121263	0.0122049	1.30051	0.379078
RPL8	P62917	sp|P62917|RL8_HUMAN 60S ribosomal protein L8 OS=Homo sapiens OX=9606 GN=RPL8 PE=1 SV=2	6	0.000653466	0.000539733	0.0114741	0.0117699	1.21072	0.275865
RAB11B	Q15907	sp|Q15907|RB11B_HUMAN Ras-related protein Rab-11B OS=Homo sapiens OX=9606 GN=RAB11B PE=1 SV=4	2	0.00061664	0.000786005	0.00890166	0.00990939	0.784525	-0.350109
RPL23A	P62750	sp|P62750|RL23A_HUMAN 60S ribosomal protein L23a OS=Homo sapiens OX=9606 GN=RPL23A PE=1 SV=1	6	0.000755964	0.000491141	0.00407361	0.00595132	1.5392	0.62218
HNRNPH1	P31943	sp|P31943|HNRH1_HUMAN Heterogeneous nuclear ribonucleoprotein H OS=Homo sapiens OX=9606 GN=HNRNPH1 PE=1 SV=4	6	0.000686014	0.000525689	0.00634446	0.00785936	1.30498	0.384028
RPS9	P46781	sp|P46781|RS9_HUMAN 40S ribosomal protein S9 OS=Homo sapiens OX=9606 GN=RPS9 PE=1 SV=3	10	0.000725198	0.000565503	0.000959975	0.00236502	1.28239	0.358839
S100A1	P23297	sp|P23297|S10A1_HUMAN Protein S100-A1 OS=Homo sapiens OX=9606 GN=S100A1 PE=1 SV=2	3	0.00106561	0.000315157	1.78984e-05	0.000310116	3.38121	1.75754
TFRC	P02786	sp|P02786|TFR1_HUMAN Transferrin receptor protein 1 OS=Homo sapiens OX=9606 GN=TFRC PE=1 SV=2	29	0.000427975	0.000721653	0.00711562	0.00848476	0.593048	-0.753779
PFN1	P07737	sp|P07737|PROF1_HUMAN Profilin-1 OS=Homo sapiens OX=9606 GN=PFN1 PE=1 SV=2	7	0.000828474	0.000623165	2.71997e-05	0.000380123	1.32946	0.410843
ACAA2	P42765	sp|P42765|THIM_HUMAN 3-ketoacyl-CoA thiolase, mitochondrial OS=Homo sapiens OX=9606 GN=ACAA2 PE=1 SV=2	17	0.000581388	0.000713106	0.000407262	0.00144386	0.81529	-0.294615
HNRNPA1	P09651	sp|P09651|ROA1_HUMAN Heterogeneous nuclear ribonucleoprotein A1 OS=Homo sapiens OX=9606 GN=HNRNPA1 PE=1 SV=5;sp|Q32P51|RA1L2_HUMAN Heterogeneous nuclear ribonucleoprotein A1-like 2 OS=Homo sapiens OX=9606 GN=HNRNPA1L2 PE=2 SV=2	13	0.000782751	0.000568884	0.00260864	0.00443331	1.37594	0.46042
HNRNPL	P14866	sp|P14866|HNRPL_HUMAN Heterogeneous nuclear ribonucleoprotein L OS=Homo sapiens OX=9606 GN=HNRNPL PE=1 SV=2	18	0.000520386	0.000634031	0.00763701	0.00890429	0.820759	-0.28497
ALDH2	P05091	sp|P05091|ALDH2_HUMAN Aldehyde dehydrogenase, mitochondrial OS=Homo sapiens OX=9606 GN=ALDH2 PE=1 SV=2	20	0.000472716	0.000803807	6.84813e-05	0.000565231	0.588096	-0.765876
RPS3	P23396	sp|P23396|RS3_HUMAN 40S ribosomal protein S3 OS=Homo sapiens OX=9606 GN=RPS3 PE=1 SV=2	17	0.000717384	0.000562633	0.000358538	0.0013497	1.27505	0.350551
RPL27	P61353	sp|P61353|RL27_HUMAN 60S ribosomal protein L27 OS=Homo sapiens OX=9606 GN=RPL27 PE=1 SV=2	4	0.000815779	0.000507904	4.55865e-06	0.000182968	1.60617	0.683622
TOMM6	Q96B49	sp|Q96B49|TOM6_HUMAN Mitochondrial import receptor subunit TOM6 homolog OS=Homo sapiens OX=9606 GN=TOMM6 PE=1 SV=1	2	0.000529633	0.00104049	7.71979e-05	0.00058979	0.509021	-0.974203
ACO2	Q99798	sp|Q99798|ACON_HUMAN Aconitate hydratase, mitochondrial OS=Homo sapiens OX=9606 GN=ACO2 PE=1 SV=2	30	0.000485054	0.000718342	1.28634e-05	0.000263784	0.675242	-0.566524
XRCC6	P12956	sp|P12956|XRCC6_HUMAN X-ray repair cross-complementing protein 6 OS=Homo sapiens OX=9606 GN=XRCC6 PE=1 SV=2	29	0.000738679	0.000521364	0.000684326	0.00190888	1.41682	0.502659
COX5A	P20674	sp|P20674|COX5A_HUMAN Cytochrome c oxidase subunit 5A, mitochondrial OS=Homo sapiens OX=9606 GN=COX5A PE=1 SV=2	7	0.000724129	0.000505801	0.00107393	0.00254437	1.43165	0.517676
HIBADH	P31937	sp|P31937|3HIDH_HUMAN 3-hydroxyisobutyrate dehydrogenase, mitochondrial OS=Homo sapiens OX=9606 GN=HIBADH PE=1 SV=2	13	0.000526115	0.000732672	0.00161279	0.0032665	0.718077	-0.477789
CS	O75390	sp|O75390|CISY_HUMAN Citrate synthase, mitochondrial OS=Homo sapiens OX=9606 GN=CS PE=1 SV=2	13	0.000527224	0.000648134	0.0020837	0.00383387	0.813449	-0.297877
RPS13	P62277	sp|P62277|RS13_HUMAN 40S ribosomal protein S13 OS=Homo sapiens OX=9606 GN=RPS13 PE=1 SV=2	8	0.000772674	0.000481641	0.00016463	0.000893123	1.60425	0.681901
GOT2	P00505	sp|P00505|AATM_HUMAN Aspartate aminotransferase, mitochondrial OS=Homo sapiens OX=9606 GN=GOT2 PE=1 SV=3	21	0.000427436	0.000711497	5.48438e-06	0.000197242	0.600757	-0.735147
CDH17	Q12864	sp|Q12864|CAD17_HUMAN Cadherin-17 OS=Homo sapiens OX=9606 GN=CDH17 PE=2 SV=3	28	0.000513571	0.000648025	0.000391714	0.00141503	0.792517	-0.335485
HNRNPH3	P31942	sp|P31942|HNRH3_HUMAN Heterogeneous nuclear ribonucleoprotein H3 OS=Homo sapiens OX=9606 GN=HNRNPH3 PE=1 SV=2	8	0.000607583	0.000471401	0.000311174	0.0012463	1.28889	0.366126
CLDN4	O14493	sp|O14493|CLD4_HUMAN Claudin-4 OS=Homo sapiens OX=9606 GN=CLDN4 PE=1 SV=1	1	0.000410876	0.000694608	0.00152007	0.00315281	0.591523	-0.757494
CAT	P04040	sp|P04040|CATA_HUMAN Catalase OS=Homo sapiens OX=9606 GN=CAT PE=1 SV=3	22	0.000504766	0.000640483	0.0122939	0.012314	0.788101	-0.343548
SLC9A3R1	O14745	sp|O14745|NHRF1_HUMAN Na(+)/H(+) exchange regulatory cofactor NHE-RF1 OS=Homo sapiens OX=9606 GN=SLC9A3R1 PE=1 SV=4	20	0.000526982	0.000640189	0.0199913	0.0172929	0.823165	-0.280746
EPCAM	P16422	sp|P16422|EPCAM_HUMAN Epithelial cell adhesion molecule OS=Homo sapiens OX=9606 GN=EPCAM PE=1 SV=2	9	0.000329033	0.000743447	0.000216123	0.00103985	0.442577	-1.176
RPL36	Q9Y3U8	sp|Q9Y3U8|RL36_HUMAN 60S ribosomal protein L36 OS=Homo sapiens OX=9606 GN=RPL36 PE=1 SV=3	3	0.000427045	0.000547243	0.00494581	0.00669749	0.780357	-0.357793
RAB7A	P51149	sp|P51149|RAB7A_HUMAN Ras-related protein Rab-7a OS=Homo sapiens OX=9606 GN=RAB7A PE=1 SV=1	13	0.000469121	0.000578949	0.00106333	0.00252826	0.810298	-0.303476
ERP29	P30040	sp|P30040|ERP29_HUMAN Endoplasmic reticulum resident protein 29 OS=Homo sapiens OX=9606 GN=ERP29 PE=1 SV=4	11	0.000498188	0.000648576	0.00699934	0.00839348	0.768126	-0.380586
ARL6IP5	O75915	sp|O75915|PRAF3_HUMAN PRA1 family protein 3 OS=Homo sapiens OX=9606 GN=ARL6IP5 PE=1 SV=1	4	0.000728173	0.000492854	0.0051052	0.00682222	1.47746	0.563121
GDI2	P50395	sp|P50395|GDIB_HUMAN Rab GDP dissociation inhibitor beta OS=Homo sapiens OX=9606 GN=GDI2 PE=1 SV=2	15	0.000687986	0.000534015	0.014302	0.0137303	1.28833	0.365498
SOD2	P04179	sp|P04179|SODM_HUMAN Superoxide dismutase [Mn], mitochondrial OS=Homo sapiens OX=9606 GN=SOD2 PE=1 SV=3	7	0.000417793	0.000681582	0.00281354	0.00464317	0.612976	-0.706097
DECR1	Q16698	sp|Q16698|DECR_HUMAN 2,4-dienoyl-CoA reductase, mitochondrial OS=Homo sapiens OX=9606 GN=DECR1 PE=1 SV=1	17	0.000539258	0.000669848	0.00404557	0.00592537	0.805044	-0.31286
RAB1B	Q9H0U4	sp|Q9H0U4|RAB1B_HUMAN Ras-related protein Rab-1B OS=Homo sapiens OX=9606 GN=RAB1B PE=1 SV=1	3	0.000615091	0.000442822	0.00236059	0.00416188	1.38903	0.474073
RPL29	P47914	sp|P47914|RL29_HUMAN 60S ribosomal protein L29 OS=Homo sapiens OX=9606 GN=RPL29 PE=1 SV=2	2	0.000653347	0.000477049	0.00169428	0.00336233	1.36956	0.453711
CDHR5	Q9HBB8	sp|Q9HBB8|CDHR5_HUMAN Cadherin-related family member 5 OS=Homo sapiens OX=9606 GN=CDHR5 PE=1 SV=3	12	0.000364763	0.000631851	0.000894759	0.0022558	0.577293	-0.792625
GPRC5A	Q8NFJ5	sp|Q8NFJ5|RAI3_HUMAN Retinoic acid-induced protein 3 OS=Homo sapiens OX=9606 GN=GPRC5A PE=1 SV=2	4	0.000394613	0.000504301	0.0169817	0.0154796	0.782496	-0.353844
ACTN4	O43707	sp|O43707|ACTN4_HUMAN Alpha-actinin-4 OS=Homo sapiens OX=9606 GN=ACTN4 PE=1 SV=2	36	0.000578437	0.000462035	0.00115096	0.002658	1.25193	0.324158
RPL10	P27635	sp|P27635|RL10_HUMAN 60S ribosomal protein L10 OS=Homo sapiens OX=9606 GN=RPL10 PE=1 SV=4	7	0.000610763	0.000475434	0.000539153	0.00168551	1.28464	0.361367
DLST	P36957	sp|P36957|ODO2_HUMAN Dihydrolipoyllysine-residue succinyltransferase component of 2-oxoglutarate dehydrogenase complex, mitochondrial OS=Homo sapiens OX=9606 GN=DLST PE=1 SV=4	14	0.000419504	0.000603458	0.000244239	0.00110753	0.695167	-0.524568
ECH1	Q13011	sp|Q13011|ECH1_HUMAN Delta(3,5)-Delta(2,4)-dienoyl-CoA isomerase, mitochondrial OS=Homo sapiens OX=9606 GN=ECH1 PE=1 SV=2	11	0.00036649	0.000643678	0.000155838	0.000870273	0.569368	-0.812567
FH	P07954	sp|P07954|FUMH_HUMAN Fumarate hydratase, mitochondrial OS=Homo sapiens OX=9606 GN=FH PE=1 SV=3	17	0.000380711	0.00070702	0.000255891	0.00113336	0.538473	-0.893055
RPL10A	P62906	sp|P62906|RL10A_HUMAN 60S ribosomal protein L10a OS=Homo sapiens OX=9606 GN=RPL10A PE=1 SV=2	8	0.000590412	0.000422	0.0236038	0.0196053	1.39908	0.484477
CYCS	P99999	sp|P99999|CYC_HUMAN Cytochrome c OS=Homo sapiens OX=9606 GN=CYCS PE=1 SV=2	5	0.000764031	0.000403073	0.000691024	0.00191806	1.89552	0.922592
PGAM1	P18669	sp|P18669|PGAM1_HUMAN Phosphoglycerate mutase 1 OS=Homo sapiens OX=9606 GN=PGAM1 PE=1 SV=2	9	0.000607762	0.000434403	0.00336379	0.00525126	1.39908	0.484474
PDHA1	P08559	sp|P08559|ODPA_HUMAN Pyruvate dehydrogenase E1 component subunit alpha, somatic form, mitochondrial OS=Homo sapiens OX=9606 GN=PDHA1 PE=1 SV=3	20	0.000414021	0.000548326	0.000565363	0.00172928	0.755064	-0.405329
ROMO1	P60602	sp|P60602|ROMO1_HUMAN Reactive oxygen species modulator 1 OS=Homo sapiens OX=9606 GN=ROMO1 PE=1 SV=1	2	0.000364027	0.000631901	9.10759e-05	0.000649146	0.576082	-0.795654
NDUFA4	O00483	sp|O00483|NDUA4_HUMAN Cytochrome c oxidase subunit NDUFA4 OS=Homo sapiens OX=9606 GN=NDUFA4 PE=1 SV=1	4	0.000339144	0.000648207	0.00424832	0.00611006	0.523202	-0.934559
EIF6	P56537	sp|P56537|IF6_HUMAN Eukaryotic translation initiation factor 6 OS=Homo sapiens OX=9606 GN=EIF6 PE=1 SV=1	5	0.000581238	0.000386337	0.0146133	0.0139431	1.50448	0.589268
SRSF3	P84103	sp|P84103|SRSF3_HUMAN Serine/arginine-rich splicing factor 3 OS=Homo sapiens OX=9606 GN=SRSF3 PE=1 SV=1	7	0.000460176	0.000586172	0.0127585	0.0126357	0.785052	-0.34914
NDRG1	Q92597	sp|Q92597|NDRG1_HUMAN Protein NDRG1 OS=Homo sapiens OX=9606 GN=NDRG1 PE=1 SV=1	9	0.000554396	0.000390666	0.00165081	0.00331158	1.41911	0.504983
ILF2	Q12905	sp|Q12905|ILF2_HUMAN Interleukin enhancer-binding factor 2 OS=Homo sapiens OX=9606 GN=ILF2 PE=1 SV=2	13	0.000451423	0.000356434	0.00514889	0.00685583	1.2665	0.340846
HNRNPU	Q00839	sp|Q00839|HNRPU_HUMAN Heterogeneous nuclear ribonucleoprotein U OS=Homo sapiens OX=9606 GN=HNRNPU PE=1 SV=6	25	0.00061161	0.000385379	0.000649721	0.00185998	1.58703	0.666333
ALDH7A1	P49419	sp|P49419|AL7A1_HUMAN Alpha-aminoadipic semialdehyde dehydrogenase OS=Homo sapiens OX=9606 GN=ALDH7A1 PE=1 SV=5	18	0.000375153	0.000520178	7.37474e-05	0.000580518	0.721201	-0.471527
TMED2	Q15363	sp|Q15363|TMED2_HUMAN Transmembrane emp24 domain-containing protein 2 OS=Homo sapiens OX=9606 GN=TMED2 PE=1 SV=1	8	0.000538698	0.000444365	0.0145856	0.0139243	1.21229	0.277729
TMED10	P49755	sp|P49755|TMEDA_HUMAN Transmembrane emp24 domain-containing protein 10 OS=Homo sapiens OX=9606 GN=TMED10 PE=1 SV=2	7	0.000536021	0.000440948	0.00165443	0.00331584	1.21561	0.281682
ANXA3	P12429	sp|P12429|ANXA3_HUMAN Annexin A3 OS=Homo sapiens OX=9606 GN=ANXA3 PE=1 SV=3	14	0.000572959	0.000392406	1.15183e-05	0.000254772	1.46012	0.546085
RPS19	P39019	sp|P39019|RS19_HUMAN 40S ribosomal protein S19 OS=Homo sapiens OX=9606 GN=RPS19 PE=1 SV=2	10	0.000495359	0.000387207	0.0324707	0.0248186	1.27931	0.355369
XRCC5	P13010	sp|P13010|XRCC5_HUMAN X-ray repair cross-complementing protein 5 OS=Homo sapiens OX=9606 GN=XRCC5 PE=1 SV=3	24	0.000577669	0.000377228	0.0133265	0.0130465	1.53135	0.614805
TFAM	Q00059	sp|Q00059|TFAM_HUMAN Transcription factor A, mitochondrial OS=Homo sapiens OX=9606 GN=TFAM PE=1 SV=1	11	0.000556461	0.000400646	0.0118326	0.012011	1.38891	0.473954
UQCRH	P07919	sp|P07919|QCR6_HUMAN Cytochrome b-c1 complex subunit 6, mitochondrial OS=Homo sapiens OX=9606 GN=UQCRH PE=1 SV=2	4	0.00041093	0.000628237	0.0122267	0.0122704	0.654101	-0.612415
RAB10	P61026	sp|P61026|RAB10_HUMAN Ras-related protein Rab-10 OS=Homo sapiens OX=9606 GN=RAB10 PE=1 SV=1	9	0.000502763	0.000415827	0.0117992	0.0119888	1.20907	0.273894
HACD3	Q9P035	sp|Q9P035|HACD3_HUMAN Very-long-chain (3R)-3-hydroxyacyl-CoA dehydratase 3 OS=Homo sapiens OX=9606 GN=HACD3 PE=1 SV=2	7	0.000548591	0.000403255	0.000290645	0.0012037	1.36041	0.44404
SCP2	P22307	sp|P22307|NLTP_HUMAN Non-specific lipid-transfer protein OS=Homo sapiens OX=9606 GN=SCP2 PE=1 SV=2	20	0.000369395	0.000550851	0.0058956	0.00747433	0.670589	-0.576499
F11R	Q9Y624	sp|Q9Y624|JAM1_HUMAN Junctional adhesion molecule A OS=Homo sapiens OX=9606 GN=F11R PE=1 SV=1	12	0.000344583	0.000592347	0.00473834	0.00653006	0.581726	-0.781588
B2M	P61769	sp|P61769|B2MG_HUMAN Beta-2-microglobulin OS=Homo sapiens OX=9606 GN=B2M PE=1 SV=1	3	0.000242537	0.000671542	1.30353e-05	0.000264842	0.361164	-1.46927
RPS12	P25398	sp|P25398|RS12_HUMAN 40S ribosomal protein S12 OS=Homo sapiens OX=9606 GN=RPS12 PE=1 SV=3	4	0.000632284	0.000275882	0.000729234	0.00197767	2.29186	1.19652
GANAB	Q14697	sp|Q14697|GANAB_HUMAN Neutral alpha-glucosidase AB OS=Homo sapiens OX=9606 GN=GANAB PE=1 SV=3	35	0.0003823	0.000496878	0.00451258	0.00634101	0.769404	-0.378186
NOP58	Q9Y2X3	sp|Q9Y2X3|NOP58_HUMAN Nucleolar protein 58 OS=Homo sapiens OX=9606 GN=NOP58 PE=1 SV=1	19	0.000503323	0.000389293	0.000309249	0.00124181	1.29292	0.370629
CHMP4B	Q9H444	sp|Q9H444|CHM4B_HUMAN Charged multivesicular body protein 4b OS=Homo sapiens OX=9606 GN=CHMP4B PE=1 SV=1	6	0.000411156	0.000529623	0.00805438	0.00924548	0.776318	-0.36528
REEP5	Q00765	sp|Q00765|REEP5_HUMAN Receptor expression-enhancing protein 5 OS=Homo sapiens OX=9606 GN=REEP5 PE=1 SV=3	4	0.000372411	0.000536167	0.00212476	0.00388431	0.694581	-0.525786
RPS15A	P62244	sp|P62244|RS15A_HUMAN 40S ribosomal protein S15a OS=Homo sapiens OX=9606 GN=RPS15A PE=1 SV=2	5	0.000464597	0.000370219	0.00240637	0.0042135	1.25492	0.327599
DLAT	P10515	sp|P10515|ODP2_HUMAN Dihydrolipoyllysine-residue acetyltransferase component of pyruvate dehydrogenase complex, mitochondrial OS=Homo sapiens OX=9606 GN=DLAT PE=1 SV=3	12	0.00035318	0.000451454	0.000544385	0.00169395	0.782316	-0.354176
RRBP1	Q9P2E9	sp|Q9P2E9|RRBP1_HUMAN Ribosome-binding protein 1 OS=Homo sapiens OX=9606 GN=RRBP1 PE=1 SV=5	44	0.000304388	0.000543485	7.88694e-06	0.000223674	0.560067	-0.83633
EIF5A	P63241	sp|P63241|IF5A1_HUMAN Eukaryotic translation initiation factor 5A-1 OS=Homo sapiens OX=9606 GN=EIF5A PE=1 SV=2;sp|Q6IS14|IF5AL_HUMAN Eukaryotic translation initiation factor 5A-1-like OS=Homo sapiens OX=9606 GN=EIF5AL1 PE=2 SV=2	11	0.000615328	0.000300543	0.0026172	0.00444232	2.04739	1.03378
MPDU1	O75352	sp|O75352|MPU1_HUMAN Mannose-P-dolichol utilization defect 1 protein OS=Homo sapiens OX=9606 GN=MPDU1 PE=1 SV=2	3	0.000472778	0.000353536	0.000614548	0.00180758	1.33728	0.419305
RPS11	P62280	sp|P62280|RS11_HUMAN 40S ribosomal protein S11 OS=Homo sapiens OX=9606 GN=RPS11 PE=1 SV=3	11	0.000501565	0.000330171	0.00312661	0.00499545	1.51911	0.603223
UQCR10	Q9UDW1	sp|Q9UDW1|QCR9_HUMAN Cytochrome b-c1 complex subunit 9 OS=Homo sapiens OX=9606 GN=UQCR10 PE=1 SV=3	2	0.000470794	0.000290617	0.00040905	0.00144711	1.61998	0.695978
RPL17	P18621	sp|P18621|RL17_HUMAN 60S ribosomal protein L17 OS=Homo sapiens OX=9606 GN=RPL17 PE=1 SV=3	5	0.000386172	0.000519178	0.00184396	0.00352908	0.743814	-0.426987
TMEM14C	Q9P0S9	sp|Q9P0S9|TM14C_HUMAN Transmembrane protein 14C OS=Homo sapiens OX=9606 GN=TMEM14C PE=1 SV=1	3	0.000894241	0.000181835	0.000106369	0.00071171	4.91787	2.29803
APOA4	P06727	sp|P06727|APOA4_HUMAN Apolipoprotein A-IV OS=Homo sapiens OX=9606 GN=APOA4 PE=1 SV=3	17	2.1812e-05	0.00067582	0.000502027	0.00162331	0.0322749	-4.95344
SEC61A1	P61619	sp|P61619|S61A1_HUMAN Protein transport protein Sec61 subunit alpha isoform 1 OS=Homo sapiens OX=9606 GN=SEC61A1 PE=1 SV=2;sp|Q9H9S3|S61A2_HUMAN Protein transport protein Sec61 subunit alpha isoform 2 OS=Homo sapiens OX=9606 GN=SEC61A2 PE=2 SV=3	9	0.000284977	0.000431145	0.00859108	0.00966899	0.660975	-0.597332
RPL24	P83731	sp|P83731|RL24_HUMAN 60S ribosomal protein L24 OS=Homo sapiens OX=9606 GN=RPL24 PE=1 SV=1	7	0.000577916	0.000241957	0.00375057	0.00564419	2.38851	1.25611
AIFM1	O95831	sp|O95831|AIFM1_HUMAN Apoptosis-inducing factor 1, mitochondrial OS=Homo sapiens OX=9606 GN=AIFM1 PE=1 SV=1	18	0.000333469	0.000457621	0.000878895	0.00222977	0.728702	-0.456599
RPL5	P46777	sp|P46777|RL5_HUMAN 60S ribosomal protein L5 OS=Homo sapiens OX=9606 GN=RPL5 PE=1 SV=3	9	0.000388761	0.000283408	0.0169233	0.0154434	1.37173	0.456
TSPAN8	P19075	sp|P19075|TSN8_HUMAN Tetraspanin-8 OS=Homo sapiens OX=9606 GN=TSPAN8 PE=1 SV=1	1	0.000256058	0.000488396	0.000999307	0.00242851	0.524283	-0.931583
RPS28	P62857	sp|P62857|RS28_HUMAN 40S ribosomal protein S28 OS=Homo sapiens OX=9606 GN=RPS28 PE=1 SV=1	3	0.000521666	0.000282738	0.00114108	0.00264376	1.84505	0.88366
ETHE1	O95571	sp|O95571|ETHE1_HUMAN Persulfide dioxygenase ETHE1, mitochondrial OS=Homo sapiens OX=9606 GN=ETHE1 PE=1 SV=2	9	0.0002431	0.000477471	7.45981e-05	0.000582856	0.509141	-0.973863
MATR3	P43243	sp|P43243|MATR3_HUMAN Matrin-3 OS=Homo sapiens OX=9606 GN=MATR3 PE=1 SV=2	28	0.000436046	0.000279849	0.0031267	0.00499555	1.55815	0.63983
MINOS1	Q5TGZ0	sp|Q5TGZ0|MIC10_HUMAN MICOS complex subunit MIC10 OS=Homo sapiens OX=9606 GN=MINOS1 PE=1 SV=1	2	0.000399898	0.000499059	0.0159771	0.0148449	0.801303	-0.319581
HMGN1	P05114	sp|P05114|HMGN1_HUMAN Non-histone chromosomal protein HMG-14 OS=Homo sapiens OX=9606 GN=HMGN1 PE=1 SV=3	7	0.000341071	0.000496292	0.0394568	0.0286477	0.687238	-0.541118
SRP14	P37108	sp|P37108|SRP14_HUMAN Signal recognition particle 14 kDa protein OS=Homo sapiens OX=9606 GN=SRP14 PE=1 SV=2	6	0.00024121	0.000555145	0.00490652	0.00666623	0.434499	-1.20258
U2AF1L5	P0DN76	sp|P0DN76|U2AF5_HUMAN Splicing factor U2AF 35 kDa subunit-like protein OS=Homo sapiens OX=9606 GN=U2AF1L5 PE=1 SV=1;sp|Q01081|U2AF1_HUMAN Splicing factor U2AF 35 kDa subunit OS=Homo sapiens OX=9606 GN=U2AF1 PE=1 SV=3;sp|Q8WU68|U2AF4_HUMAN Splicing factor U	6	0.000424649	0.000275098	0.0166695	0.015285	1.54363	0.626325
TKT	P29401	sp|P29401|TKT_HUMAN Transketolase OS=Homo sapiens OX=9606 GN=TKT PE=1 SV=3	18	0.000430713	0.000303399	0.000761778	0.0020294	1.41963	0.505511
KHDRBS1	Q07666	sp|Q07666|KHDR1_HUMAN KH domain-containing, RNA-binding, signal transduction-associated protein 1 OS=Homo sapiens OX=9606 GN=KHDRBS1 PE=1 SV=1	5	0.00046452	0.000267333	0.00863954	0.00970643	1.73761	0.797102
SEC61B	P60468	sp|P60468|SC61B_HUMAN Protein transport protein Sec61 subunit beta OS=Homo sapiens OX=9606 GN=SEC61B PE=1 SV=2	3	0.000311316	0.000390737	0.0019044	0.00360576	0.796741	-0.327816
PSAP	P07602	sp|P07602|SAP_HUMAN Prosaposin OS=Homo sapiens OX=9606 GN=PSAP PE=1 SV=2	14	0.000173977	0.000502022	1.74117e-06	0.000119237	0.346553	-1.52885
ALDH6A1	Q02252	sp|Q02252|MMSA_HUMAN Methylmalonate-semialdehyde dehydrogenase [acylating], mitochondrial OS=Homo sapiens OX=9606 GN=ALDH6A1 PE=1 SV=2	17	0.0002702	0.00040849	0.00354522	0.00543918	0.661462	-0.59627
RPS2	P15880	sp|P15880|RS2_HUMAN 40S ribosomal protein S2 OS=Homo sapiens OX=9606 GN=RPS2 PE=1 SV=2	7	0.000413235	0.00025434	0.00223122	0.0040121	1.62473	0.700203
SHMT2	P34897	sp|P34897|GLYM_HUMAN Serine hydroxymethyltransferase, mitochondrial OS=Homo sapiens OX=9606 GN=SHMT2 PE=1 SV=3	18	0.000275798	0.000375086	3.81615e-05	0.000442181	0.735293	-0.443609
CDH1	P12830	sp|P12830|CADH1_HUMAN Cadherin-1 OS=Homo sapiens OX=9606 GN=CDH1 PE=1 SV=3	16	0.000258014	0.000386487	0.00016828	0.000903977	0.667588	-0.582971
SLC25A20	O43772	sp|O43772|MCAT_HUMAN Mitochondrial carnitine/acylcarnitine carrier protein OS=Homo sapiens OX=9606 GN=SLC25A20 PE=1 SV=1	10	0.000270008	0.000363841	0.00370898	0.00560331	0.742104	-0.430307
CD59	P13987	sp|P13987|CD59_HUMAN CD59 glycoprotein OS=Homo sapiens OX=9606 GN=CD59 PE=1 SV=1	3	0.000315841	0.000392686	4.39078e-05	0.000470213	0.804308	-0.314181
AHCY	P23526	sp|P23526|SAHH_HUMAN Adenosylhomocysteinase OS=Homo sapiens OX=9606 GN=AHCY PE=1 SV=4	13	0.000365826	0.000267611	0.0107916	0.0112964	1.36701	0.451023
FAU	P62861	sp|P62861|RS30_HUMAN 40S ribosomal protein S30 OS=Homo sapiens OX=9606 GN=FAU PE=1 SV=1	1	0.000486182	8.20741e-05	0.00853483	0.00962538	5.92369	2.5665
SLC25A24	Q6NUK1	sp|Q6NUK1|SCMC1_HUMAN Calcium-binding mitochondrial carrier protein SCaMC-1 OS=Homo sapiens OX=9606 GN=SLC25A24 PE=1 SV=2	19	0.000289169	0.000372607	0.0198347	0.0171913	0.776068	-0.365744
ERP44	Q9BS26	sp|Q9BS26|ERP44_HUMAN Endoplasmic reticulum resident protein 44 OS=Homo sapiens OX=9606 GN=ERP44 PE=1 SV=1	11	0.000267962	0.000382073	3.57784e-06	0.000166121	0.701339	-0.511817
GPA33	Q99795	sp|Q99795|GPA33_HUMAN Cell surface A33 antigen OS=Homo sapiens OX=9606 GN=GPA33 PE=1 SV=1	10	0.000309162	0.000384955	0.0328653	0.0250365	0.803112	-0.316327
NDUFS1	P28331	sp|P28331|NDUS1_HUMAN NADH-ubiquinone oxidoreductase 75 kDa subunit, mitochondrial OS=Homo sapiens OX=9606 GN=NDUFS1 PE=1 SV=3	27	0.00026035	0.000365296	0.00028744	0.0011976	0.71271	-0.488613
RPL9	P32969	sp|P32969|RL9_HUMAN 60S ribosomal protein L9 OS=Homo sapiens OX=9606 GN=RPL9 PE=1 SV=1	7	0.000337956	0.000250104	0.00370198	0.0055964	1.35126	0.434309
P4HA1	P13674	sp|P13674|P4HA1_HUMAN Prolyl 4-hydroxylase subunit alpha-1 OS=Homo sapiens OX=9606 GN=P4HA1 PE=1 SV=2	15	0.000267957	0.000460953	0.000353164	0.0013386	0.581311	-0.782618
RPL34	P49207	sp|P49207|RL34_HUMAN 60S ribosomal protein L34 OS=Homo sapiens OX=9606 GN=RPL34 PE=1 SV=3	5	0.000266204	0.000442567	0.0068589	0.00828183	0.601502	-0.73336
EEF2	P13639	sp|P13639|EF2_HUMAN Elongation factor 2 OS=Homo sapiens OX=9606 GN=EEF2 PE=1 SV=4	28	0.000360538	0.000270512	0.000256029	0.00113366	1.3328	0.414461
REEP6	Q96HR9	sp|Q96HR9|REEP6_HUMAN Receptor expression-enhancing protein 6 OS=Homo sapiens OX=9606 GN=REEP6 PE=1 SV=2	4	0.000478248	0.0001766	0.000252358	0.00112566	2.70808	1.43727
AK4	P27144	sp|P27144|KAD4_HUMAN Adenylate kinase 4, mitochondrial OS=Homo sapiens OX=9606 GN=AK4 PE=1 SV=1	11	0.000269339	0.00035306	0.00112761	0.00262417	0.762869	-0.390492
RSL1D1	O76021	sp|O76021|RL1D1_HUMAN Ribosomal L1 domain-containing protein 1 OS=Homo sapiens OX=9606 GN=RSL1D1 PE=1 SV=3	15	0.000391705	0.000239493	0.00597043	0.00753873	1.63556	0.709787
TMEM205	Q6UW68	sp|Q6UW68|TM205_HUMAN Transmembrane protein 205 OS=Homo sapiens OX=9606 GN=TMEM205 PE=1 SV=1	3	0.000411593	0.000232453	0.00937053	0.0102638	1.77065	0.824276
RACK1	P63244	sp|P63244|RACK1_HUMAN Receptor of activated protein C kinase 1 OS=Homo sapiens OX=9606 GN=RACK1 PE=1 SV=3	18	0.000376374	0.000253974	0.00139806	0.00299459	1.48194	0.567488
DBI	P07108	sp|P07108|ACBP_HUMAN Acyl-CoA-binding protein OS=Homo sapiens OX=9606 GN=DBI PE=1 SV=2	4	0.000368415	0.000299708	0.023813	0.0197346	1.22924	0.297772
APMAP	Q9HDC9	sp|Q9HDC9|APMAP_HUMAN Adipocyte plasma membrane-associated protein OS=Homo sapiens OX=9606 GN=APMAP PE=1 SV=2	13	0.000380897	0.000207377	0.00133746	0.00291218	1.83673	0.877142
CYP27A1	Q02318	sp|Q02318|CP27A_HUMAN Sterol 26-hydroxylase, mitochondrial OS=Homo sapiens OX=9606 GN=CYP27A1 PE=1 SV=1	16	0.000216526	0.00039576	0.000202757	0.00100468	0.547116	-0.870082
CLTA	P09496	sp|P09496|CLCA_HUMAN Clathrin light chain A OS=Homo sapiens OX=9606 GN=CLTA PE=1 SV=1	2	0.000133495	0.000391132	2.28057e-05	0.000350693	0.341305	-1.55087
VTN	P04004	sp|P04004|VTNC_HUMAN Vitronectin OS=Homo sapiens OX=9606 GN=VTN PE=1 SV=1	9	0.000238916	0.000291304	0.0040677	0.00594586	0.82016	-0.286022
SLC37A4	O43826	sp|O43826|G6PT1_HUMAN Glucose-6-phosphate exchanger SLC37A4 OS=Homo sapiens OX=9606 GN=SLC37A4 PE=1 SV=1	6	0.000254631	0.000384116	0.0179613	0.0160758	0.662902	-0.593132
HIST2H2AB	Q8IUE6	sp|Q8IUE6|H2A2B_HUMAN Histone H2A type 2-B OS=Homo sapiens OX=9606 GN=HIST2H2AB PE=1 SV=3	1	0.000624051	0.000132242	0.00015015	0.000854763	4.71903	2.23849
RPS16	P62249	sp|P62249|RS16_HUMAN 40S ribosomal protein S16 OS=Homo sapiens OX=9606 GN=RPS16 PE=1 SV=2	8	0.000368676	0.000222874	0.0448016	0.0313784	1.65419	0.726129
SCCPDH	Q8NBX0	sp|Q8NBX0|SCPDL_HUMAN Saccharopine dehydrogenase-like oxidoreductase OS=Homo sapiens OX=9606 GN=SCCPDH PE=1 SV=1	11	0.000356552	0.000238415	0.0291403	0.0229195	1.49551	0.580638
ACBD5	Q5T8D3	sp|Q5T8D3|ACBD5_HUMAN Acyl-CoA-binding domain-containing protein 5 OS=Homo sapiens OX=9606 GN=ACBD5 PE=1 SV=1	14	0.00017593	0.000276895	0.00866076	0.00972277	0.635368	-0.654336
STARD10	Q9Y365	sp|Q9Y365|STA10_HUMAN START domain-containing protein 10 OS=Homo sapiens OX=9606 GN=STARD10 PE=1 SV=2	9	0.000382562	0.000255682	0.00185631	0.00354231	1.49624	0.581343
LMAN2	Q12907	sp|Q12907|LMAN2_HUMAN Vesicular integral-membrane protein VIP36 OS=Homo sapiens OX=9606 GN=LMAN2 PE=1 SV=1	10	0.000282425	0.000225994	0.0426244	0.0302738	1.2497	0.321583
RPS15	P62841	sp|P62841|RS15_HUMAN 40S ribosomal protein S15 OS=Homo sapiens OX=9606 GN=RPS15 PE=1 SV=2	4	0.000325077	0.000228853	0.00367809	0.00557274	1.42047	0.506364
NDUFS3	O75489	sp|O75489|NDUS3_HUMAN NADH dehydrogenase [ubiquinone] iron-sulfur protein 3, mitochondrial OS=Homo sapiens OX=9606 GN=NDUFS3 PE=1 SV=1	7	0.000237841	0.000287356	0.0280887	0.0222967	0.827686	-0.272844
SURF4	O15260	sp|O15260|SURF4_HUMAN Surfeit locus protein 4 OS=Homo sapiens OX=9606 GN=SURF4 PE=1 SV=3	6	0.000452361	0.000175324	5.39759e-05	0.000514265	2.58015	1.36745
CD9	P21926	sp|P21926|CD9_HUMAN CD9 antigen OS=Homo sapiens OX=9606 GN=CD9 PE=1 SV=4	3	0.000113086	0.000372294	0.00753435	0.00881872	0.303755	-1.71902
ACADM	P11310	sp|P11310|ACADM_HUMAN Medium-chain specific acyl-CoA dehydrogenase, mitochondrial OS=Homo sapiens OX=9606 GN=ACADM PE=1 SV=1	13	0.000211188	0.000361777	0.000621174	0.00181767	0.583752	-0.776573
CYP2S1	Q96SQ9	sp|Q96SQ9|CP2S1_HUMAN Cytochrome P450 2S1 OS=Homo sapiens OX=9606 GN=CYP2S1 PE=1 SV=2	11	0.000237666	0.000310516	0.00253778	0.00435779	0.765391	-0.385731
ORMDL1	Q9P0S3	sp|Q9P0S3|ORML1_HUMAN ORM1-like protein 1 OS=Homo sapiens OX=9606 GN=ORMDL1 PE=1 SV=1;sp|Q53FV1|ORML2_HUMAN ORM1-like protein 2 OS=Homo sapiens OX=9606 GN=ORMDL2 PE=1 SV=2	1	0.000101959	0.000589244	0.00937642	0.0102681	0.173033	-2.53088
H1FX	Q92522	sp|Q92522|H1X_HUMAN Histone H1x OS=Homo sapiens OX=9606 GN=H1FX PE=1 SV=1	8	0.000232952	0.000354488	0.000294506	0.00121096	0.657151	-0.605704
MARC2	Q969Z3	sp|Q969Z3|MARC2_HUMAN Mitochondrial amidoxime reducing component 2 OS=Homo sapiens OX=9606 GN=MARC2 PE=1 SV=1	11	0.00022841	0.000332004	0.0146249	0.0139509	0.687972	-0.539578
MARCKSL1	P49006	sp|P49006|MRP_HUMAN MARCKS-related protein OS=Homo sapiens OX=9606 GN=MARCKSL1 PE=1 SV=2	2	0.000263283	0.000346395	0.00390362	0.00579197	0.760066	-0.395803
SNAP23	O00161	sp|O00161|SNP23_HUMAN Synaptosomal-associated protein 23 OS=Homo sapiens OX=9606 GN=SNAP23 PE=1 SV=1	9	0.000239628	0.000294796	0.0333656	0.0253107	0.812861	-0.298919
PRDX2	P32119	sp|P32119|PRDX2_HUMAN Peroxiredoxin-2 OS=Homo sapiens OX=9606 GN=PRDX2 PE=1 SV=5	4	0.000345898	0.000218545	0.000275726	0.00117466	1.58273	0.662415
YBX1	P67809	sp|P67809|YBOX1_HUMAN Nuclease-sensitive element-binding protein 1 OS=Homo sapiens OX=9606 GN=YBX1 PE=1 SV=3	5	0.000310494	0.000217169	0.000159021	0.000878701	1.42974	0.515748
AGMAT	Q9BSE5	sp|Q9BSE5|SPEB_HUMAN Agmatinase, mitochondrial OS=Homo sapiens OX=9606 GN=AGMAT PE=1 SV=2	8	0.000228092	0.00032566	0.00543653	0.00707125	0.7004	-0.513749
CD99	P14209	sp|P14209|CD99_HUMAN CD99 antigen OS=Homo sapiens OX=9606 GN=CD99 PE=1 SV=1	1	0.000168661	0.00036802	0.000384653	0.00140157	0.458293	-1.12566
RPL35	P42766	sp|P42766|RL35_HUMAN 60S ribosomal protein L35 OS=Homo sapiens OX=9606 GN=RPL35 PE=1 SV=2	4	0.00042604	0.000159899	0.0261686	0.021151	2.66443	1.41382
SPCS1	Q9Y6A9	sp|Q9Y6A9|SPCS1_HUMAN Signal peptidase complex subunit 1 OS=Homo sapiens OX=9606 GN=SPCS1 PE=1 SV=4	3	0.000362649	0.00022417	0.00522198	0.00691153	1.61774	0.69398
FBL	P22087	sp|P22087|FBRL_HUMAN rRNA 2-O-methyltransferase fibrillarin OS=Homo sapiens OX=9606 GN=FBL PE=1 SV=2	9	0.00019006	0.00027812	0.0219256	0.0185468	0.683375	-0.54925
APOE	P02649	sp|P02649|APOE_HUMAN Apolipoprotein E OS=Homo sapiens OX=9606 GN=APOE PE=1 SV=1	15	7.96063e-05	0.000392257	2.59422e-08	9.73398e-06	0.202944	-2.30084
PLEC	Q15149	sp|Q15149|PLEC_HUMAN Plectin OS=Homo sapiens OX=9606 GN=PLEC PE=1 SV=3	184	0.000308576	0.00023413	1.91431e-06	0.000123474	1.31797	0.398317
DYNLL2	Q96FJ2	sp|Q96FJ2|DYL2_HUMAN Dynein light chain 2, cytoplasmic OS=Homo sapiens OX=9606 GN=DYNLL2 PE=1 SV=1	2	0.000313406	0.000195403	0.0130607	0.0128554	1.6039	0.681585
FIS1	Q9Y3D6	sp|Q9Y3D6|FIS1_HUMAN Mitochondrial fission 1 protein OS=Homo sapiens OX=9606 GN=FIS1 PE=1 SV=2	4	0.000342441	0.000226085	0.0434166	0.0306775	1.51465	0.598988
CTSA	P10619	sp|P10619|PPGB_HUMAN Lysosomal protective protein OS=Homo sapiens OX=9606 GN=CTSA PE=1 SV=2	6	0.0001819	0.000372902	3.97717e-05	0.000450215	0.487794	-1.03566
GLS	O94925	sp|O94925|GLSK_HUMAN Glutaminase kidney isoform, mitochondrial OS=Homo sapiens OX=9606 GN=GLS PE=1 SV=1	17	0.000215841	0.00031115	0.00357624	0.00547065	0.693688	-0.527641
HMGCL	P35914	sp|P35914|HMGCL_HUMAN Hydroxymethylglutaryl-CoA lyase, mitochondrial OS=Homo sapiens OX=9606 GN=HMGCL PE=1 SV=2	8	0.000209972	0.000338247	0.00097506	0.00238958	0.620766	-0.687879
HYOU1	Q9Y4L1	sp|Q9Y4L1|HYOU1_HUMAN Hypoxia up-regulated protein 1 OS=Homo sapiens OX=9606 GN=HYOU1 PE=1 SV=1	32	0.000228622	0.000291901	0.000726387	0.00197327	0.783219	-0.352512
HNRNPUL2	Q1KMD3	sp|Q1KMD3|HNRL2_HUMAN Heterogeneous nuclear ribonucleoprotein U-like protein 2 OS=Homo sapiens OX=9606 GN=HNRNPUL2 PE=1 SV=1	20	0.000195367	0.000256667	0.000281266	0.00118564	0.761168	-0.393713
ALPI	P09923	sp|P09923|PPBI_HUMAN Intestinal-type alkaline phosphatase OS=Homo sapiens OX=9606 GN=ALPI PE=1 SV=2	11	0.000216577	0.000291033	0.000393729	0.00141883	0.744165	-0.426306
CMC1	Q7Z7K0	sp|Q7Z7K0|COXM1_HUMAN COX assembly mitochondrial protein homolog OS=Homo sapiens OX=9606 GN=CMC1 PE=1 SV=1	3	0.000278175	0.000339649	0.00422638	0.0060904	0.819005	-0.288055
NDUFA3	O95167	sp|O95167|NDUA3_HUMAN NADH dehydrogenase [ubiquinone] 1 alpha subcomplex subunit 3 OS=Homo sapiens OX=9606 GN=NDUFA3 PE=1 SV=1	3	0.000186629	0.000248621	0.0424666	0.0301945	0.750655	-0.413777
CLDN1	O95832	sp|O95832|CLD1_HUMAN Claudin-1 OS=Homo sapiens OX=9606 GN=CLDN1 PE=1 SV=1	3	0.000214637	0.000304355	4.65832e-05	0.000482065	0.705218	-0.503858
NACA	Q13765	sp|Q13765|NACA_HUMAN Nascent polypeptide-associated complex subunit alpha OS=Homo sapiens OX=9606 GN=NACA PE=1 SV=1;sp|E9PAV3|NACAM_HUMAN Nascent polypeptide-associated complex subunit alpha, muscle-specific form OS=Homo sapiens OX=9606 GN=NACA PE=1 SV=1	4	0.000309257	0.00021763	0.00150689	0.00313621	1.42102	0.506927
SLC11A2	P49281	sp|P49281|NRAM2_HUMAN Natural resistance-associated macrophage protein 2 OS=Homo sapiens OX=9606 GN=SLC11A2 PE=1 SV=2	4	0.000215779	0.000299073	0.00372214	0.00561628	0.721493	-0.470942
DHRS7B	Q6IAN0	sp|Q6IAN0|DRS7B_HUMAN Dehydrogenase/reductase SDR family member 7B OS=Homo sapiens OX=9606 GN=DHRS7B PE=1 SV=2	7	0.000272666	0.00020576	0.00277941	0.00460906	1.32516	0.406171
TMPO	P42166	sp|P42166|LAP2A_HUMAN Lamina-associated polypeptide 2, isoform alpha OS=Homo sapiens OX=9606 GN=TMPO PE=1 SV=2	9	0.000306101	0.000206498	0.0262391	0.0211923	1.48234	0.567881
ACTR3	P61158	sp|P61158|ARP3_HUMAN Actin-related protein 3 OS=Homo sapiens OX=9606 GN=ACTR3 PE=1 SV=3	16	0.000292084	0.000241973	0.000100308	0.000687852	1.20709	0.271536
GNG5	P63218	sp|P63218|GBG5_HUMAN Guanine nucleotide-binding protein G(I)/G(S)/G(O) subunit gamma-5 OS=Homo sapiens OX=9606 GN=GNG5 PE=1 SV=3	3	5.02974e-05	0.00053069	0.000347454	0.00132663	0.0947774	-3.39931
LRPPRC	P42704	sp|P42704|LPPRC_HUMAN Leucine-rich PPR motif-containing protein, mitochondrial OS=Homo sapiens OX=9606 GN=LRPPRC PE=1 SV=3	50	0.000184466	0.000285172	5.87608e-05	0.000532732	0.646858	-0.628479
RPL3	P39023	sp|P39023|RL3_HUMAN 60S ribosomal protein L3 OS=Homo sapiens OX=9606 GN=RPL3 PE=1 SV=2	13	0.000244293	0.000185398	0.010675	0.0112136	1.31767	0.397989
CISD2	Q8N5K1	sp|Q8N5K1|CISD2_HUMAN CDGSH iron-sulfur domain-containing protein 2 OS=Homo sapiens OX=9606 GN=CISD2 PE=1 SV=1	7	0.000275359	0.000193305	0.00124173	0.00278477	1.42448	0.510434
PPIF	P30405	sp|P30405|PPIF_HUMAN Peptidyl-prolyl cis-trans isomerase F, mitochondrial OS=Homo sapiens OX=9606 GN=PPIF PE=1 SV=1	7	0.000174443	0.000272338	0.0148388	0.0140955	0.640537	-0.642646
TM4SF1	P30408	sp|P30408|T4S1_HUMAN Transmembrane 4 L6 family member 1 OS=Homo sapiens OX=9606 GN=TM4SF1 PE=1 SV=1	1	6.2173e-05	0.000360935	0.000259879	0.00114192	0.172255	-2.53738
SLC35A4	L0R6Q1	sp|L0R6Q1|S35U4_HUMAN SLC35A4 upstream open reading frame protein OS=Homo sapiens OX=9606 GN=SLC35A4 PE=3 SV=1	4	0.000220405	0.00027952	0.0423841	0.030153	0.788511	-0.342797
NDUFA2	O43678	sp|O43678|NDUA2_HUMAN NADH dehydrogenase [ubiquinone] 1 alpha subcomplex subunit 2 OS=Homo sapiens OX=9606 GN=NDUFA2 PE=1 SV=3	3	0.000161996	0.000285858	0.00985803	0.0106203	0.566701	-0.81934
MIF	P14174	sp|P14174|MIF_HUMAN Macrophage migration inhibitory factor OS=Homo sapiens OX=9606 GN=MIF PE=1 SV=4	2	0.000342554	0.000165513	0.00357211	0.00546648	2.06964	1.04938
ILVBL	A1L0T0	sp|A1L0T0|ILVBL_HUMAN Acetolactate synthase-like protein OS=Homo sapiens OX=9606 GN=ILVBL PE=1 SV=2	16	0.000297271	0.000176285	0.00489114	0.00665394	1.68631	0.75387
HSPA6	P17066	sp|P17066|HSP76_HUMAN Heat shock 70 kDa protein 6 OS=Homo sapiens OX=9606 GN=HSPA6 PE=1 SV=2	1	0.000201134	0.000261843	0.00305487	0.00491569	0.768147	-0.380546
RPS23	P62266	sp|P62266|RS23_HUMAN 40S ribosomal protein S23 OS=Homo sapiens OX=9606 GN=RPS23 PE=1 SV=3	3	0.000212235	0.00029983	0.00215355	0.00391929	0.707851	-0.498482
TMEM33	P57088	sp|P57088|TMM33_HUMAN Transmembrane protein 33 OS=Homo sapiens OX=9606 GN=TMEM33 PE=1 SV=2	6	0.000152462	0.000205986	0.00122615	0.00276354	0.74016	-0.434092
ACOT1	Q86TX2	sp|Q86TX2|ACOT1_HUMAN Acyl-coenzyme A thioesterase 1 OS=Homo sapiens OX=9606 GN=ACOT1 PE=1 SV=1;sp|P49753|ACOT2_HUMAN Acyl-coenzyme A thioesterase 2, mitochondrial OS=Homo sapiens OX=9606 GN=ACOT2 PE=1 SV=6	12	0.000190257	0.000265245	0.00115018	0.00265689	0.717287	-0.479377
CD63	P08962	sp|P08962|CD63_HUMAN CD63 antigen OS=Homo sapiens OX=9606 GN=CD63 PE=1 SV=2	2	0.000107632	0.000348154	2.23952e-05	0.000347639	0.309149	-1.69362
PDCD10	Q9BUL8	sp|Q9BUL8|PDC10_HUMAN Programmed cell death protein 10 OS=Homo sapiens OX=9606 GN=PDCD10 PE=1 SV=1	2	3.59091e-05	5.31101e-05	0.00060606	0.0017945	0.676125	-0.564637
GLG1	Q92896	sp|Q92896|GSLG1_HUMAN Golgi apparatus protein 1 OS=Homo sapiens OX=9606 GN=GLG1 PE=1 SV=2	35	0.000181141	0.000273542	0.000426744	0.00148309	0.662208	-0.594645
ALYREF	Q86V81	sp|Q86V81|THOC4_HUMAN THO complex subunit 4 OS=Homo sapiens OX=9606 GN=ALYREF PE=1 SV=3	9	0.000315232	0.000138251	0.000156555	0.000872187	2.28015	1.18913
IVD	P26440	sp|P26440|IVD_HUMAN Isovaleryl-CoA dehydrogenase, mitochondrial OS=Homo sapiens OX=9606 GN=IVD PE=1 SV=2	8	0.000177622	0.00025881	0.00130982	0.00287605	0.686304	-0.543081
TSPO	P30536	sp|P30536|TSPO_HUMAN Translocator protein OS=Homo sapiens OX=9606 GN=TSPO PE=1 SV=3	3	0.000284172	0.000201634	0.0118938	0.0120517	1.40934	0.495025
TARDBP	Q13148	sp|Q13148|TADBP_HUMAN TAR DNA-binding protein 43 OS=Homo sapiens OX=9606 GN=TARDBP PE=1 SV=1	8	0.000177528	0.000229389	0.0419151	0.0299159	0.773919	-0.369746
SUCLA2	Q9P2R7	sp|Q9P2R7|SUCB1_HUMAN Succinate--CoA ligase [ADP-forming] subunit beta, mitochondrial OS=Homo sapiens OX=9606 GN=SUCLA2 PE=1 SV=3	12	0.000153188	0.000285006	0.00109941	0.00258261	0.53749	-0.89569
TRAP1	Q12931	sp|Q12931|TRAP1_HUMAN Heat shock protein 75 kDa, mitochondrial OS=Homo sapiens OX=9606 GN=TRAP1 PE=1 SV=3	16	0.000142726	0.000264003	3.56048e-05	0.000429583	0.540623	-0.887306
COPZ1	P61923	sp|P61923|COPZ1_HUMAN Coatomer subunit zeta-1 OS=Homo sapiens OX=9606 GN=COPZ1 PE=1 SV=1	3	0.000253571	0.000189201	0.0359328	0.0267514	1.34022	0.422474
ALDH5A1	P51649	sp|P51649|SSDH_HUMAN Succinate-semialdehyde dehydrogenase, mitochondrial OS=Homo sapiens OX=9606 GN=ALDH5A1 PE=1 SV=2	16	0.000170049	0.000263828	0.0295018	0.0231309	0.644543	-0.633652
ALDH1A1	P00352	sp|P00352|AL1A1_HUMAN Retinal dehydrogenase 1 OS=Homo sapiens OX=9606 GN=ALDH1A1 PE=1 SV=2	19	0.000246175	0.000178846	0.0189269	0.0166426	1.37647	0.46097
PSPC1	Q8WXF1	sp|Q8WXF1|PSPC1_HUMAN Paraspeckle component 1 OS=Homo sapiens OX=9606 GN=PSPC1 PE=1 SV=1	11	0.000247147	0.000165427	0.000226256	0.00106517	1.49399	0.579175
CEACAM5	P06731	sp|P06731|CEAM5_HUMAN Carcinoembryonic antigen-related cell adhesion molecule 5 OS=Homo sapiens OX=9606 GN=CEACAM5 PE=1 SV=3	4	0.000126866	0.000255029	2.87603e-05	0.000390104	0.497458	-1.00735
PICALM	Q13492	sp|Q13492|PICAL_HUMAN Phosphatidylinositol-binding clathrin assembly protein OS=Homo sapiens OX=9606 GN=PICALM PE=1 SV=2	11	0.000240639	0.000178517	0.0292648	0.0229924	1.34799	0.430808
PARP1	P09874	sp|P09874|PARP1_HUMAN Poly [ADP-ribose] polymerase 1 OS=Homo sapiens OX=9606 GN=PARP1 PE=1 SV=4	29	0.000235042	0.000164261	0.00693682	0.00834396	1.4309	0.516926
ACAD11	Q709F0	sp|Q709F0|ACD11_HUMAN Acyl-CoA dehydrogenase family member 11 OS=Homo sapiens OX=9606 GN=ACAD11 PE=1 SV=3	22	0.000228307	0.000175402	0.00425252	0.00611382	1.30162	0.380311
NDUFB6	O95139	sp|O95139|NDUB6_HUMAN NADH dehydrogenase [ubiquinone] 1 beta subcomplex subunit 6 OS=Homo sapiens OX=9606 GN=NDUFB6 PE=1 SV=3	2	0.000149548	0.000244065	0.00226566	0.00405256	0.61274	-0.706654
TMBIM1	Q969X1	sp|Q969X1|LFG3_HUMAN Protein lifeguard 3 OS=Homo sapiens OX=9606 GN=TMBIM1 PE=1 SV=2	3	0.000126146	0.000217567	0.000540417	0.00168756	0.579803	-0.786365
IDH2	P48735	sp|P48735|IDHP_HUMAN Isocitrate dehydrogenase [NADP], mitochondrial OS=Homo sapiens OX=9606 GN=IDH2 PE=1 SV=2	14	0.000140817	0.000227013	0.0166577	0.0152775	0.620303	-0.688954
RAB14	P61106	sp|P61106|RAB14_HUMAN Ras-related protein Rab-14 OS=Homo sapiens OX=9606 GN=RAB14 PE=1 SV=4	8	0.000182008	0.000232323	0.00136758	0.00295344	0.783426	-0.352132
CPT1A	P50416	sp|P50416|CPT1A_HUMAN Carnitine O-palmitoyltransferase 1, liver isoform OS=Homo sapiens OX=9606 GN=CPT1A PE=1 SV=2	19	0.000151073	0.00018208	9.49995e-05	0.000665963	0.829706	-0.269327
CCT7	Q99832	sp|Q99832|TCPH_HUMAN T-complex protein 1 subunit eta OS=Homo sapiens OX=9606 GN=CCT7 PE=1 SV=2	21	0.000217541	0.000158375	0.00614367	0.00768846	1.37358	0.45794
MCU	Q8NE86	sp|Q8NE86|MCU_HUMAN Calcium uniporter protein, mitochondrial OS=Homo sapiens OX=9606 GN=MCU PE=1 SV=1	9	0.000191668	0.000136697	0.00545061	0.00708154	1.40214	0.487629
PGAM5	Q96HS1	sp|Q96HS1|PGAM5_HUMAN Serine/threonine-protein phosphatase PGAM5, mitochondrial OS=Homo sapiens OX=9606 GN=PGAM5 PE=1 SV=2	9	0.000199046	0.000161444	8.00201e-06	0.000224662	1.23292	0.302074
ASPH	Q12797	sp|Q12797|ASPH_HUMAN Aspartyl/asparaginyl beta-hydroxylase OS=Homo sapiens OX=9606 GN=ASPH PE=1 SV=3	14	0.00015303	0.000202976	0.0118365	0.0120136	0.75393	-0.407497
SLC27A2	O14975	sp|O14975|S27A2_HUMAN Very long-chain acyl-CoA synthetase OS=Homo sapiens OX=9606 GN=SLC27A2 PE=1 SV=2	15	0.000222803	0.00014817	0.00108786	0.00256535	1.5037	0.588516
LASP1	Q14847	sp|Q14847|LASP1_HUMAN LIM and SH3 domain protein 1 OS=Homo sapiens OX=9606 GN=LASP1 PE=1 SV=2	8	0.000149405	0.000214121	0.0223432	0.0188138	0.69776	-0.519198
CPNE1	Q99829	sp|Q99829|CPNE1_HUMAN Copine-1 OS=Homo sapiens OX=9606 GN=CPNE1 PE=1 SV=1	11	0.00024031	0.000144686	0.000163426	0.000890073	1.66091	0.731975
H2AFX	P16104	sp|P16104|H2AX_HUMAN Histone H2AX OS=Homo sapiens OX=9606 GN=H2AFX PE=1 SV=2	2	3.59129e-05	0.000438806	0.000541327	0.00168903	0.0818424	-3.61101
LAMTOR4	Q0VGL1	sp|Q0VGL1|LTOR4_HUMAN Ragulator complex protein LAMTOR4 OS=Homo sapiens OX=9606 GN=LAMTOR4 PE=1 SV=1	2	0.000159622	0.000201675	0.000531908	0.0016737	0.791482	-0.337372
NDUFA11	Q86Y39	sp|Q86Y39|NDUAB_HUMAN NADH dehydrogenase [ubiquinone] 1 alpha subcomplex subunit 11 OS=Homo sapiens OX=9606 GN=NDUFA11 PE=1 SV=3	4	0.000223827	0.000162124	0.0264683	0.0213262	1.3806	0.465292
SNRPD1	P62314	sp|P62314|SMD1_HUMAN Small nuclear ribonucleoprotein Sm D1 OS=Homo sapiens OX=9606 GN=SNRPD1 PE=1 SV=1	2	0.000404258	7.07677e-05	0.000431951	0.00149346	5.71247	2.51411
HEPH	Q9BQS7	sp|Q9BQS7|HEPH_HUMAN Hephaestin OS=Homo sapiens OX=9606 GN=HEPH PE=1 SV=3	17	0.000134296	0.000224947	3.74635e-05	0.000438842	0.597014	-0.744162
PFKP	Q01813	sp|Q01813|PFKAP_HUMAN ATP-dependent 6-phosphofructokinase, platelet type OS=Homo sapiens OX=9606 GN=PFKP PE=1 SV=2	15	0.000201571	0.000142117	0.0223679	0.0188296	1.41835	0.504212
OSTC	Q9NRP0	sp|Q9NRP0|OSTC_HUMAN Oligosaccharyltransferase complex subunit OSTC OS=Homo sapiens OX=9606 GN=OSTC PE=1 SV=1	2	0.000199723	0.000114732	0.0018072	0.00348924	1.74078	0.799731
TXNDC5	Q8NBS9	sp|Q8NBS9|TXND5_HUMAN Thioredoxin domain-containing protein 5 OS=Homo sapiens OX=9606 GN=TXNDC5 PE=1 SV=2	11	0.000132512	0.000222008	0.00593448	0.00750786	0.59688	-0.744488
CNPY2	Q9Y2B0	sp|Q9Y2B0|CNPY2_HUMAN Protein canopy homolog 2 OS=Homo sapiens OX=9606 GN=CNPY2 PE=1 SV=1	7	0.000132889	0.000212795	0.00479184	0.0065738	0.624495	-0.679238
CYP51A1	Q16850	sp|Q16850|CP51A_HUMAN Lanosterol 14-alpha demethylase OS=Homo sapiens OX=9606 GN=CYP51A1 PE=1 SV=3	12	0.000131118	0.000208453	0.00155311	0.00319395	0.629007	-0.668852
NUCB1	Q02818	sp|Q02818|NUCB1_HUMAN Nucleobindin-1 OS=Homo sapiens OX=9606 GN=NUCB1 PE=1 SV=4	14	0.00010792	0.000228921	6.55202e-05	0.000555965	0.471426	-1.0849
ATP5IF1	Q9UII2	sp|Q9UII2|ATIF1_HUMAN ATPase inhibitor, mitochondrial OS=Homo sapiens OX=9606 GN=ATP5IF1 PE=1 SV=1	2	0.000129387	0.000536043	0.00376677	0.00566004	0.241375	-2.05065
AGPAT1	Q99943	sp|Q99943|PLCA_HUMAN 1-acyl-sn-glycerol-3-phosphate acyltransferase alpha OS=Homo sapiens OX=9606 GN=AGPAT1 PE=1 SV=2	4	0.00019459	0.000158149	0.00522695	0.00691529	1.23042	0.299156
NDUFB3	O43676	sp|O43676|NDUB3_HUMAN NADH dehydrogenase [ubiquinone] 1 beta subcomplex subunit 3 OS=Homo sapiens OX=9606 GN=NDUFB3 PE=1 SV=3	2	0.00016392	0.000202351	0.00442106	0.00626223	0.810078	-0.303867
TCP1	P17987	sp|P17987|TCPA_HUMAN T-complex protein 1 subunit alpha OS=Homo sapiens OX=9606 GN=TCP1 PE=1 SV=1	21	0.00021515	0.00015154	0.00116676	0.00268062	1.41976	0.505645
BSG	P35613	sp|P35613|BASI_HUMAN Basigin OS=Homo sapiens OX=9606 GN=BSG PE=1 SV=2	8	0.000159236	0.000227653	0.00216408	0.003932	0.699467	-0.515673
ANP32A	P39687	sp|P39687|AN32A_HUMAN Acidic leucine-rich nuclear phosphoprotein 32 family member A OS=Homo sapiens OX=9606 GN=ANP32A PE=1 SV=1	3	0.000112519	0.000153764	0.000658451	0.00187256	0.73176	-0.450557
KHSRP	Q92945	sp|Q92945|FUBP2_HUMAN Far upstream element-binding protein 2 OS=Homo sapiens OX=9606 GN=KHSRP PE=1 SV=4	19	0.000149638	0.00018582	0.0262088	0.0211746	0.805285	-0.312429
NME1	P15531	sp|P15531|NDKA_HUMAN Nucleoside diphosphate kinase A OS=Homo sapiens OX=9606 GN=NME1 PE=1 SV=1	2	0.000197024	0.0001457	0.0206651	0.0177258	1.35226	0.435368
CRAT	P43155	sp|P43155|CACP_HUMAN Carnitine O-acetyltransferase OS=Homo sapiens OX=9606 GN=CRAT PE=1 SV=5	17	0.000116698	0.000185074	0.00109508	0.00257614	0.630549	-0.66532
FLOT1	O75955	sp|O75955|FLOT1_HUMAN Flotillin-1 OS=Homo sapiens OX=9606 GN=FLOT1 PE=1 SV=3	17	0.000201606	0.000151826	0.00154969	0.00318971	1.32787	0.409119
STX3	Q13277	sp|Q13277|STX3_HUMAN Syntaxin-3 OS=Homo sapiens OX=9606 GN=STX3 PE=1 SV=3	6	0.000128094	0.00020328	0.000936425	0.00232616	0.630135	-0.666266
PLIN3	O60664	sp|O60664|PLIN3_HUMAN Perilipin-3 OS=Homo sapiens OX=9606 GN=PLIN3 PE=1 SV=3	12	0.000211368	0.000100532	0.0024285	0.00423819	2.1025	1.07211
ABHD10	Q9NUJ1	sp|Q9NUJ1|ABHDA_HUMAN Mycophenolic acid acyl-glucuronide esterase, mitochondrial OS=Homo sapiens OX=9606 GN=ABHD10 PE=1 SV=1	8	0.000125018	0.000204264	5.37321e-05	0.000513273	0.612044	-0.708293
SND1	Q7KZF4	sp|Q7KZF4|SND1_HUMAN Staphylococcal nuclease domain-containing protein 1 OS=Homo sapiens OX=9606 GN=SND1 PE=1 SV=1	24	0.000153292	0.000184912	0.0129606	0.0127829	0.829004	-0.270549
SFN	P31947	sp|P31947|1433S_HUMAN 14-3-3 protein sigma OS=Homo sapiens OX=9606 GN=SFN PE=1 SV=1	2	0.000137098	0.000199991	0.0322498	0.0246959	0.685521	-0.544728
FKBP3	Q00688	sp|Q00688|FKBP3_HUMAN Peptidyl-prolyl cis-trans isomerase FKBP3 OS=Homo sapiens OX=9606 GN=FKBP3 PE=1 SV=1	4	0.000203252	0.00014761	0.0258991	0.0209925	1.37695	0.461478
UGDH	O60701	sp|O60701|UGDH_HUMAN UDP-glucose 6-dehydrogenase OS=Homo sapiens OX=9606 GN=UGDH PE=1 SV=1	18	0.000186629	0.000143371	0.0168171	0.0153773	1.30172	0.380415
DEK	P35659	sp|P35659|DEK_HUMAN Protein DEK OS=Homo sapiens OX=9606 GN=DEK PE=1 SV=1	9	0.000181935	0.000138941	0.00178977	0.0034701	1.30944	0.388954
GATD3A	P0DPI2	sp|P0DPI2|GAL3A_HUMAN Glutamine amidotransferase-like class 1 domain-containing protein 3A, mitochondrial OS=Homo sapiens OX=9606 GN=GATD3A PE=1 SV=1;sp|A0A0B4J2D5|GAL3B_HUMAN Glutamine amidotransferase-like class 1 domain-containing protein 3B, mitochondr	7	0.000102181	0.000200578	0.0301971	0.0235339	0.509435	-0.973029
ESYT1	Q9BSJ8	sp|Q9BSJ8|ESYT1_HUMAN Extended synaptotagmin-1 OS=Homo sapiens OX=9606 GN=ESYT1 PE=1 SV=1	22	0.000171479	0.000138681	0.00462208	0.00643362	1.2365	0.306267
PTMS	P20962	sp|P20962|PTMS_HUMAN Parathymosin OS=Homo sapiens OX=9606 GN=PTMS PE=1 SV=2	1	5.39719e-05	0.000373713	0.000964452	0.00237233	0.144421	-2.79165
LMAN1	P49257	sp|P49257|LMAN1_HUMAN Protein ERGIC-53 OS=Homo sapiens OX=9606 GN=LMAN1 PE=1 SV=2	7	0.000112545	0.000151913	0.013172	0.0129357	0.740853	-0.43274
VKORC1	Q9BQB6	sp|Q9BQB6|VKOR1_HUMAN Vitamin K epoxide reductase complex subunit 1 OS=Homo sapiens OX=9606 GN=VKORC1 PE=1 SV=1	2	0.000145891	0.000205008	0.000195541	0.000984811	0.711638	-0.490784
HIBCH	Q6NVY1	sp|Q6NVY1|HIBCH_HUMAN 3-hydroxyisobutyryl-CoA hydrolase, mitochondrial OS=Homo sapiens OX=9606 GN=HIBCH PE=1 SV=2	13	0.000136005	0.00020288	0.00056991	0.00173678	0.67037	-0.576971
SLIRP	Q9GZT3	sp|Q9GZT3|SLIRP_HUMAN SRA stem-loop-interacting RNA-binding protein, mitochondrial OS=Homo sapiens OX=9606 GN=SLIRP PE=1 SV=1	2	0.000142454	0.000177815	0.0293229	0.0230264	0.801132	-0.319889
HTATIP2	Q9BUP3	sp|Q9BUP3|HTAI2_HUMAN Oxidoreductase HTATIP2 OS=Homo sapiens OX=9606 GN=HTATIP2 PE=1 SV=2	10	0.000115584	0.000162901	0.0393026	0.0285667	0.709537	-0.495051
PABPN1	Q86U42	sp|Q86U42|PABP2_HUMAN Polyadenylate-binding protein 2 OS=Homo sapiens OX=9606 GN=PABPN1 PE=1 SV=3	6	0.000131965	0.000180066	0.000120011	0.000761388	0.73287	-0.44837
ERGIC3	Q9Y282	sp|Q9Y282|ERGI3_HUMAN Endoplasmic reticulum-Golgi intermediate compartment protein 3 OS=Homo sapiens OX=9606 GN=ERGIC3 PE=1 SV=1	9	0.000129239	0.000199275	0.0225849	0.0189673	0.648546	-0.624719
ABCB1	P08183	sp|P08183|MDR1_HUMAN Multidrug resistance protein 1 OS=Homo sapiens OX=9606 GN=ABCB1 PE=1 SV=3	28	0.000125271	0.000163236	0.00154929	0.00318923	0.767426	-0.381901
LACTB2	Q53H82	sp|Q53H82|LACB2_HUMAN Endoribonuclease LACTB2 OS=Homo sapiens OX=9606 GN=LACTB2 PE=1 SV=2	9	0.000108809	0.000162087	0.00041697	0.00146333	0.671299	-0.574973
NOP10	Q9NPE3	sp|Q9NPE3|NOP10_HUMAN H/ACA ribonucleoprotein complex subunit 3 OS=Homo sapiens OX=9606 GN=NOP10 PE=1 SV=1	1	0.000129961	0.000171341	0.0462705	0.0321573	0.758496	-0.398787
MAGT1	Q9H0U3	sp|Q9H0U3|MAGT1_HUMAN Magnesium transporter protein 1 OS=Homo sapiens OX=9606 GN=MAGT1 PE=1 SV=1	5	0.000137938	0.000172041	9.07036e-05	0.000647521	0.801774	-0.318732
SLC1A5	Q15758	sp|Q15758|AAAT_HUMAN Neutral amino acid transporter B(0) OS=Homo sapiens OX=9606 GN=SLC1A5 PE=1 SV=2	9	8.23156e-05	0.000206618	0.000271345	0.00116581	0.398396	-1.32773
PDHX	O00330	sp|O00330|ODPX_HUMAN Pyruvate dehydrogenase protein X component, mitochondrial OS=Homo sapiens OX=9606 GN=PDHX PE=1 SV=3	14	0.000109675	0.000184168	0.0109454	0.0114048	0.595516	-0.747788
ARPC4	P59998	sp|P59998|ARPC4_HUMAN Actin-related protein 2/3 complex subunit 4 OS=Homo sapiens OX=9606 GN=ARPC4 PE=1 SV=3	4	0.000165862	0.000101021	0.049187	0.0336815	1.64186	0.715332
APOA1	P02647	sp|P02647|APOA1_HUMAN Apolipoprotein A-I OS=Homo sapiens OX=9606 GN=APOA1 PE=1 SV=1	8	1.30717e-05	0.000220198	2.08775e-06	0.000127252	0.0593635	-4.07428
CALU	O43852	sp|O43852|CALU_HUMAN Calumenin OS=Homo sapiens OX=9606 GN=CALU PE=1 SV=2	8	7.82402e-05	0.000166113	7.19804e-06	0.000217312	0.471006	-1.08618
DDRGK1	Q96HY6	sp|Q96HY6|DDRGK_HUMAN DDRGK domain-containing protein 1 OS=Homo sapiens OX=9606 GN=DDRGK1 PE=1 SV=2	5	0.000173336	0.000121504	0.00218912	0.00396208	1.42659	0.512569
IDH3A	P50213	sp|P50213|IDH3A_HUMAN Isocitrate dehydrogenase [NAD] subunit alpha, mitochondrial OS=Homo sapiens OX=9606 GN=IDH3A PE=1 SV=1	9	0.000126753	0.00015744	0.00518356	0.00688233	0.805088	-0.312781
NFYA	P23511	sp|P23511|NFYA_HUMAN Nuclear transcription factor Y subunit alpha OS=Homo sapiens OX=9606 GN=NFYA PE=1 SV=2	1	0.000157455	0.000117921	0.0124773	0.0124323	1.33526	0.417118
GOLT1B	Q9Y3E0	sp|Q9Y3E0|GOT1B_HUMAN Vesicle transport protein GOT1B OS=Homo sapiens OX=9606 GN=GOLT1B PE=1 SV=1	3	0.000199922	5.01684e-05	0.0073443	0.00866132	3.98503	1.99459
NDUFB10	O96000	sp|O96000|NDUBA_HUMAN NADH dehydrogenase [ubiquinone] 1 beta subcomplex subunit 10 OS=Homo sapiens OX=9606 GN=NDUFB10 PE=1 SV=3	5	0.000105807	0.000169867	9.33862e-05	0.000659115	0.622884	-0.682964
PRSS8	Q16651	sp|Q16651|PRSS8_HUMAN Prostasin OS=Homo sapiens OX=9606 GN=PRSS8 PE=1 SV=1	3	7.44356e-05	0.000183813	0.000445571	0.00152008	0.404953	-1.30417
CCT4	P50991	sp|P50991|TCPD_HUMAN T-complex protein 1 subunit delta OS=Homo sapiens OX=9606 GN=CCT4 PE=1 SV=4	14	0.00015369	0.000114234	0.0384582	0.02812	1.34539	0.428027
ITGB1	P05556	sp|P05556|ITB1_HUMAN Integrin beta-1 OS=Homo sapiens OX=9606 GN=ITGB1 PE=1 SV=2	16	9.77288e-05	0.000203698	0.000426468	0.00148253	0.479773	-1.05958
EPHX1	P07099	sp|P07099|HYEP_HUMAN Epoxide hydrolase 1 OS=Homo sapiens OX=9606 GN=EPHX1 PE=1 SV=1	11	0.000168248	0.000107578	0.000108132	0.000718431	1.56397	0.64521
ARPC2	O15144	sp|O15144|ARPC2_HUMAN Actin-related protein 2/3 complex subunit 2 OS=Homo sapiens OX=9606 GN=ARPC2 PE=1 SV=1	12	0.000163932	0.000116589	0.000210581	0.00102552	1.40606	0.491662
SCAMP2	O15127	sp|O15127|SCAM2_HUMAN Secretory carrier-associated membrane protein 2 OS=Homo sapiens OX=9606 GN=SCAMP2 PE=1 SV=2	2	0.000173942	9.28558e-05	0.0138049	0.0133852	1.87325	0.905544
LAMP1	P11279	sp|P11279|LAMP1_HUMAN Lysosome-associated membrane glycoprotein 1 OS=Homo sapiens OX=9606 GN=LAMP1 PE=1 SV=3	3	8.60375e-05	0.000205646	0.046704	0.0323867	0.418376	-1.25713
CYC1	P08574	sp|P08574|CY1_HUMAN Cytochrome c1, heme protein, mitochondrial OS=Homo sapiens OX=9606 GN=CYC1 PE=1 SV=3	7	0.000188798	9.17723e-05	0.000395422	0.001422	2.05724	1.04071
BRI3BP	Q8WY22	sp|Q8WY22|BRI3B_HUMAN BRI3-binding protein OS=Homo sapiens OX=9606 GN=BRI3BP PE=1 SV=1	3	0.000105099	0.000169045	0.00301099	0.00486635	0.621724	-0.685653
NEU1	Q99519	sp|Q99519|NEUR1_HUMAN Sialidase-1 OS=Homo sapiens OX=9606 GN=NEU1 PE=1 SV=1	6	0.00012241	0.00016421	0.0016047	0.0032568	0.745448	-0.42382
NDUFA7	O95182	sp|O95182|NDUA7_HUMAN NADH dehydrogenase [ubiquinone] 1 alpha subcomplex subunit 7 OS=Homo sapiens OX=9606 GN=NDUFA7 PE=1 SV=3	4	0.000126745	0.000155447	0.0147262	0.0140196	0.815358	-0.294494
ELOVL1	Q9BW60	sp|Q9BW60|ELOV1_HUMAN Elongation of very long chain fatty acids protein 1 OS=Homo sapiens OX=9606 GN=ELOVL1 PE=1 SV=1	2	0.000180092	7.60762e-05	0.017063	0.0155299	2.36726	1.24322
NDUFA12	Q9UI09	sp|Q9UI09|NDUAC_HUMAN NADH dehydrogenase [ubiquinone] 1 alpha subcomplex subunit 12 OS=Homo sapiens OX=9606 GN=NDUFA12 PE=1 SV=1	3	6.88671e-05	0.000112634	0.00505593	0.00678401	0.611423	-0.709758
FARSA	Q9Y285	sp|Q9Y285|SYFA_HUMAN Phenylalanine--tRNA ligase alpha subunit OS=Homo sapiens OX=9606 GN=FARSA PE=1 SV=3	7	0.00014561	0.000118796	0.00259346	0.00441726	1.22571	0.293617
PON2	Q15165	sp|Q15165|PON2_HUMAN Serum paraoxonase/arylesterase 2 OS=Homo sapiens OX=9606 GN=PON2 PE=1 SV=4	10	0.000193457	8.85486e-05	0.00411785	0.00599199	2.18475	1.12747
NDUFB7	P17568	sp|P17568|NDUB7_HUMAN NADH dehydrogenase [ubiquinone] 1 beta subcomplex subunit 7 OS=Homo sapiens OX=9606 GN=NDUFB7 PE=1 SV=4	3	5.89866e-05	0.000181552	0.00493942	0.00669242	0.324902	-1.62193
DARS2	Q6PI48	sp|Q6PI48|SYDM_HUMAN Aspartate--tRNA ligase, mitochondrial OS=Homo sapiens OX=9606 GN=DARS2 PE=1 SV=1	17	0.000108458	0.000157578	0.00111474	0.0026053	0.688283	-0.538927
NDUFS8	O00217	sp|O00217|NDUS8_HUMAN NADH dehydrogenase [ubiquinone] iron-sulfur protein 8, mitochondrial OS=Homo sapiens OX=9606 GN=NDUFS8 PE=1 SV=1	3	8.46995e-05	0.000130713	5.99085e-05	0.000536898	0.64798	-0.62598
RPS27	P42677	sp|P42677|RS27_HUMAN 40S ribosomal protein S27 OS=Homo sapiens OX=9606 GN=RPS27 PE=1 SV=3	1	0.000168896	8.3503e-05	0.0189126	0.0166344	2.02264	1.01624
GLRX5	Q86SX6	sp|Q86SX6|GLRX5_HUMAN Glutaredoxin-related protein 5, mitochondrial OS=Homo sapiens OX=9606 GN=GLRX5 PE=1 SV=2	3	9.57619e-05	0.000149172	0.008384	0.00950756	0.641957	-0.639451
MRPL41	Q8IXM3	sp|Q8IXM3|RM41_HUMAN 39S ribosomal protein L41, mitochondrial OS=Homo sapiens OX=9606 GN=MRPL41 PE=1 SV=1	4	9.8873e-05	0.000158003	0.0199997	0.0172984	0.625766	-0.676304
MESD	Q14696	sp|Q14696|MESD_HUMAN LRP chaperone MESD OS=Homo sapiens OX=9606 GN=MESD PE=1 SV=2	7	0.000103213	0.000133854	0.00493225	0.00668672	0.771089	-0.375031
RDH11	Q8TC12	sp|Q8TC12|RDH11_HUMAN Retinol dehydrogenase 11 OS=Homo sapiens OX=9606 GN=RDH11 PE=1 SV=2	6	0.000136503	0.000112992	0.00100157	0.00243212	1.20808	0.272715
COA6	Q5JTJ3	sp|Q5JTJ3|COA6_HUMAN Cytochrome c oxidase assembly factor 6 homolog OS=Homo sapiens OX=9606 GN=COA6 PE=1 SV=1	4	0.000102243	0.000155511	0.00343283	0.00532354	0.657463	-0.605018
HLA-A	P01892	sp|P01892|1A02_HUMAN HLA class I histocompatibility antigen, A-2 alpha chain OS=Homo sapiens OX=9606 GN=HLA-A PE=1 SV=1;sp|P10316|1A69_HUMAN HLA class I histocompatibility antigen, A-69 alpha chain OS=Homo sapiens OX=9606 GN=HLA-A PE=1 SV=2;sp|P30459|1A74_	2	3.92242e-05	0.000213973	7.77899e-05	0.000591326	0.183313	-2.44762
FBLL1	A6NHQ2	sp|A6NHQ2|FBLL1_HUMAN rRNA/tRNA 2-O-methyltransferase fibrillarin-like protein 1 OS=Homo sapiens OX=9606 GN=FBLL1 PE=3 SV=2	1	0.000141057	0.000116538	0.0263286	0.0212447	1.21039	0.275474
PAG1	Q9NWQ8	sp|Q9NWQ8|PHAG1_HUMAN Phosphoprotein associated with glycosphingolipid-enriched microdomains 1 OS=Homo sapiens OX=9606 GN=PAG1 PE=1 SV=2	10	0.000102053	0.000126968	0.0168956	0.0154262	0.803769	-0.315146
KPNB1	Q14974	sp|Q14974|IMB1_HUMAN Importin subunit beta-1 OS=Homo sapiens OX=9606 GN=KPNB1 PE=1 SV=2	19	0.000162404	8.55697e-05	0.000327076	0.00128246	1.89792	0.924418
ARF6	P62330	sp|P62330|ARF6_HUMAN ADP-ribosylation factor 6 OS=Homo sapiens OX=9606 GN=ARF6 PE=1 SV=2	4	0.000128861	9.38027e-05	0.000482726	0.00158925	1.37374	0.458109
RUVBL1	Q9Y265	sp|Q9Y265|RUVB1_HUMAN RuvB-like 1 OS=Homo sapiens OX=9606 GN=RUVBL1 PE=1 SV=1	11	0.000145634	0.000101336	0.0265237	0.0213585	1.43715	0.523207
RHOC	P08134	sp|P08134|RHOC_HUMAN Rho-related GTP-binding protein RhoC OS=Homo sapiens OX=9606 GN=RHOC PE=1 SV=1	2	0.000198762	8.88549e-05	3.10173e-05	0.000404163	2.23693	1.16152
EEF1B2	P24534	sp|P24534|EF1B_HUMAN Elongation factor 1-beta OS=Homo sapiens OX=9606 GN=EEF1B2 PE=1 SV=3	4	0.000126998	9.36645e-05	0.000931173	0.0023174	1.35588	0.439235
GCSH	P23434	sp|P23434|GCSH_HUMAN Glycine cleavage system H protein, mitochondrial OS=Homo sapiens OX=9606 GN=GCSH PE=1 SV=2	2	9.55217e-05	0.000149267	0.0111932	0.0115773	0.639939	-0.643994
ERG28	Q9UKR5	sp|Q9UKR5|ERG28_HUMAN Probable ergosterol biosynthetic protein 28 OS=Homo sapiens OX=9606 GN=ERG28 PE=1 SV=1	3	0.000165137	0.000106674	0.00123878	0.00278077	1.54805	0.63045
DPM1	O60762	sp|O60762|DPM1_HUMAN Dolichol-phosphate mannosyltransferase subunit 1 OS=Homo sapiens OX=9606 GN=DPM1 PE=1 SV=1	6	0.000153055	9.88946e-05	0.00493928	0.00669231	1.54765	0.630083
ARID3A	Q99856	sp|Q99856|ARI3A_HUMAN AT-rich interactive domain-containing protein 3A OS=Homo sapiens OX=9606 GN=ARID3A PE=1 SV=2	9	0.000135053	0.0001122	0.00509487	0.00681423	1.20369	0.267461
PHYH	O14832	sp|O14832|PAHX_HUMAN Phytanoyl-CoA dioxygenase, peroxisomal OS=Homo sapiens OX=9606 GN=PHYH PE=1 SV=1	8	6.36337e-05	0.000169365	5.86422e-05	0.000532296	0.37572	-1.41227
PABPC1	P11940	sp|P11940|PABP1_HUMAN Polyadenylate-binding protein 1 OS=Homo sapiens OX=9606 GN=PABPC1 PE=1 SV=2	10	0.000130396	9.51906e-05	0.000529677	0.00167003	1.36984	0.454008
SRP9	P49458	sp|P49458|SRP09_HUMAN Signal recognition particle 9 kDa protein OS=Homo sapiens OX=9606 GN=SRP9 PE=1 SV=2	3	5.43186e-06	0.000301151	0.000651575	0.00186267	0.018037	-5.7929
SYNCRIP	O60506	sp|O60506|HNRPQ_HUMAN Heterogeneous nuclear ribonucleoprotein Q OS=Homo sapiens OX=9606 GN=SYNCRIP PE=1 SV=2	9	0.000121274	8.67668e-05	0.0205751	0.0176684	1.3977	0.483051
TPT1	P13693	sp|P13693|TCTP_HUMAN Translationally-controlled tumor protein OS=Homo sapiens OX=9606 GN=TPT1 PE=1 SV=1	3	0.000145077	0.000102194	0.000374265	0.00138134	1.41962	0.50551
APOC3	P02656	sp|P02656|APOC3_HUMAN Apolipoprotein C-III OS=Homo sapiens OX=9606 GN=APOC3 PE=1 SV=1	2	2.20344e-08	0.00039592	0.00892732	0.00992908	5.56536e-05	-14.1332
PYGL	P06737	sp|P06737|PYGL_HUMAN Glycogen phosphorylase, liver form OS=Homo sapiens OX=9606 GN=PYGL PE=1 SV=4	21	0.000129213	0.000102024	0.0132809	0.0130138	1.26649	0.340833
LAMTOR1	Q6IAA8	sp|Q6IAA8|LTOR1_HUMAN Ragulator complex protein LAMTOR1 OS=Homo sapiens OX=9606 GN=LAMTOR1 PE=1 SV=2	6	0.000150792	9.05205e-05	0.0267002	0.021461	1.66583	0.736242
ECHDC3	Q96DC8	sp|Q96DC8|ECHD3_HUMAN Enoyl-CoA hydratase domain-containing protein 3, mitochondrial OS=Homo sapiens OX=9606 GN=ECHDC3 PE=1 SV=2	6	9.10251e-05	0.000139042	0.00442293	0.00626386	0.654659	-0.611183
COX17	Q14061	sp|Q14061|COX17_HUMAN Cytochrome c oxidase copper chaperone OS=Homo sapiens OX=9606 GN=COX17 PE=1 SV=2	2	8.81599e-05	0.000168331	4.56666e-07	6.49163e-05	0.52373	-0.933104
HSD17B8	Q92506	sp|Q92506|DHB8_HUMAN Estradiol 17-beta-dehydrogenase 8 OS=Homo sapiens OX=9606 GN=HSD17B8 PE=1 SV=2	9	6.89976e-05	0.000135405	0.0414322	0.0296702	0.509565	-0.972661
LYPLA1	O75608	sp|O75608|LYPA1_HUMAN Acyl-protein thioesterase 1 OS=Homo sapiens OX=9606 GN=LYPLA1 PE=1 SV=1	4	0.000101656	0.000128472	0.00673867	0.00818502	0.791272	-0.337754
NDUFAF3	Q9BU61	sp|Q9BU61|NDUF3_HUMAN NADH dehydrogenase [ubiquinone] 1 alpha subcomplex assembly factor 3 OS=Homo sapiens OX=9606 GN=NDUFAF3 PE=1 SV=1	4	9.26191e-05	0.000145782	0.0392071	0.0285164	0.635327	-0.654429
NSDHL	Q15738	sp|Q15738|NSDHL_HUMAN Sterol-4-alpha-carboxylate 3-dehydrogenase, decarboxylating OS=Homo sapiens OX=9606 GN=NSDHL PE=1 SV=2	10	8.06721e-05	0.000124372	0.000482461	0.00158878	0.648635	-0.62452
PCBD1	P61457	sp|P61457|PHS_HUMAN Pterin-4-alpha-carbinolamine dehydratase OS=Homo sapiens OX=9606 GN=PCBD1 PE=1 SV=2	3	0.000149793	8.37586e-05	0.0297382	0.0232684	1.78839	0.838665
PHGDH	O43175	sp|O43175|SERA_HUMAN D-3-phosphoglycerate dehydrogenase OS=Homo sapiens OX=9606 GN=PHGDH PE=1 SV=4	9	0.000129507	0.000106338	0.00396107	0.00584638	1.21788	0.284373
TUBB2A	Q13885	sp|Q13885|TBB2A_HUMAN Tubulin beta-2A chain OS=Homo sapiens OX=9606 GN=TUBB2A PE=1 SV=1	1	0.000133545	8.99268e-05	0.00862461	0.00969491	1.48504	0.5705
SPINT1	O43278	sp|O43278|SPIT1_HUMAN Kunitz-type protease inhibitor 1 OS=Homo sapiens OX=9606 GN=SPINT1 PE=1 SV=2	11	6.7456e-05	0.000151321	2.35045e-05	0.000355762	0.44578	-1.1656
MYO1A	Q9UBC5	sp|Q9UBC5|MYO1A_HUMAN Unconventional myosin-Ia OS=Homo sapiens OX=9606 GN=MYO1A PE=1 SV=1	26	9.13187e-05	0.00011755	0.00488081	0.00664566	0.776847	-0.364298
HEXB	P07686	sp|P07686|HEXB_HUMAN Beta-hexosaminidase subunit beta OS=Homo sapiens OX=9606 GN=HEXB PE=1 SV=3	7	8.95352e-05	0.000145803	0.0130948	0.0128801	0.614084	-0.703492
FAHD1	Q6P587	sp|Q6P587|FAHD1_HUMAN Acylpyruvase FAHD1, mitochondrial OS=Homo sapiens OX=9606 GN=FAHD1 PE=1 SV=2	3	7.52814e-05	0.000125972	0.000281499	0.00118609	0.597606	-0.742732
SNRPB2	P08579	sp|P08579|RU2B_HUMAN U2 small nuclear ribonucleoprotein B OS=Homo sapiens OX=9606 GN=SNRPB2 PE=1 SV=1	3	9.0339e-05	0.000121357	0.0156951	0.0146624	0.744406	-0.425839
ALDOC	P09972	sp|P09972|ALDOC_HUMAN Fructose-bisphosphate aldolase C OS=Homo sapiens OX=9606 GN=ALDOC PE=1 SV=2	11	0.000136571	9.7253e-05	0.0329441	0.0250798	1.40428	0.489832
SMU1	Q2TAY7	sp|Q2TAY7|SMU1_HUMAN WD40 repeat-containing protein SMU1 OS=Homo sapiens OX=9606 GN=SMU1 PE=1 SV=2	14	8.35455e-05	0.0001143	0.0113562	0.0116895	0.730933	-0.452189
ATP6V0C	P27449	sp|P27449|VATL_HUMAN V-type proton ATPase 16 kDa proteolipid subunit OS=Homo sapiens OX=9606 GN=ATP6V0C PE=1 SV=1	2	0.000192421	6.45221e-05	0.0025297	0.00434908	2.98225	1.5764
FAF2	Q96CS3	sp|Q96CS3|FAF2_HUMAN FAS-associated factor 2 OS=Homo sapiens OX=9606 GN=FAF2 PE=1 SV=2	10	0.00013182	9.1106e-05	0.0152059	0.0143409	1.44689	0.532956
ABCB6	Q9NP58	sp|Q9NP58|ABCB6_HUMAN ATP-binding cassette sub-family B member 6, mitochondrial OS=Homo sapiens OX=9606 GN=ABCB6 PE=1 SV=1	11	8.32545e-05	0.000137446	0.000852337	0.00218547	0.605726	-0.723262
SCARB1	Q8WTV0	sp|Q8WTV0|SCRB1_HUMAN Scavenger receptor class B member 1 OS=Homo sapiens OX=9606 GN=SCARB1 PE=1 SV=1	4	7.72883e-05	0.000137433	1.1914e-05	0.000257567	0.562369	-0.83041
POF1B	Q8WVV4	sp|Q8WVV4|POF1B_HUMAN Protein POF1B OS=Homo sapiens OX=9606 GN=POF1B PE=1 SV=3	12	0.000127557	7.8946e-05	0.0187415	0.0165353	1.61575	0.6922
BZW1	Q7L1Q6	sp|Q7L1Q6|BZW1_HUMAN Basic leucine zipper and W2 domain-containing protein 1 OS=Homo sapiens OX=9606 GN=BZW1 PE=1 SV=1	8	0.000123002	7.66798e-05	0.00152186	0.00315505	1.60409	0.681759
RNPS1	Q15287	sp|Q15287|RNPS1_HUMAN RNA-binding protein with serine-rich domain 1 OS=Homo sapiens OX=9606 GN=RNPS1 PE=1 SV=1	3	0.000100943	8.25281e-05	0.00510666	0.00682334	1.22313	0.290576
TGOLN2	O43493	sp|O43493|TGON2_HUMAN Trans-Golgi network integral membrane protein 2 OS=Homo sapiens OX=9606 GN=TGOLN2 PE=1 SV=3	8	5.92667e-05	0.000166291	1.26281e-05	0.000262304	0.356405	-1.48841
SIAE	Q9HAT2	sp|Q9HAT2|SIAE_HUMAN Sialate O-acetylesterase OS=Homo sapiens OX=9606 GN=SIAE PE=1 SV=1	9	7.04953e-05	0.000128023	4.70678e-05	0.000484126	0.550645	-0.860806
UBE2L3	P68036	sp|P68036|UB2L3_HUMAN Ubiquitin-conjugating enzyme E2 L3 OS=Homo sapiens OX=9606 GN=UBE2L3 PE=1 SV=1;sp|A0A1B0GUS4|UB2L5_HUMAN Ubiquitin-conjugating enzyme E2 L5 OS=Homo sapiens OX=9606 GN=UBE2L5 PE=2 SV=1	5	0.000153633	7.73518e-05	0.00730992	0.00863503	1.98616	0.989978
MAGOHB	Q96A72	sp|Q96A72|MGN2_HUMAN Protein mago nashi homolog 2 OS=Homo sapiens OX=9606 GN=MAGOHB PE=1 SV=1	1	9.25501e-05	6.63507e-05	0.00627794	0.00780313	1.39486	0.480123
CREB1	P16220	sp|P16220|CREB1_HUMAN Cyclic AMP-responsive element-binding protein 1 OS=Homo sapiens OX=9606 GN=CREB1 PE=1 SV=2;sp|P18846|ATF1_HUMAN Cyclic AMP-dependent transcription factor ATF-1 OS=Homo sapiens OX=9606 GN=ATF1 PE=1 SV=2	4	0.000161746	6.59952e-05	0.000637652	0.00184232	2.45088	1.2933
NADK2	Q4G0N4	sp|Q4G0N4|NAKD2_HUMAN NAD kinase 2, mitochondrial OS=Homo sapiens OX=9606 GN=NADK2 PE=1 SV=2	11	8.32254e-05	0.000113735	0.00411527	0.00598963	0.731748	-0.450582
MPZL2	O60487	sp|O60487|MPZL2_HUMAN Myelin protein zero-like protein 2 OS=Homo sapiens OX=9606 GN=MPZL2 PE=1 SV=1	2	6.01529e-05	0.000128376	6.82202e-06	0.00021348	0.468569	-1.09367
FDXR	P22570	sp|P22570|ADRO_HUMAN NADPH:adrenodoxin oxidoreductase, mitochondrial OS=Homo sapiens OX=9606 GN=FDXR PE=1 SV=3	15	7.66186e-05	0.000121702	0.00917789	0.0101195	0.629556	-0.667593
NAXE	Q8NCW5	sp|Q8NCW5|NNRE_HUMAN NAD(P)H-hydrate epimerase OS=Homo sapiens OX=9606 GN=NAXE PE=1 SV=2	5	6.87305e-05	0.000113214	0.00156064	0.00320322	0.607083	-0.720033
BCAM	P50895	sp|P50895|BCAM_HUMAN Basal cell adhesion molecule OS=Homo sapiens OX=9606 GN=BCAM PE=1 SV=2	15	6.93653e-05	0.000132654	0.00456504	0.00638559	0.522904	-0.935383
SNRPA	P09012	sp|P09012|SNRPA_HUMAN U1 small nuclear ribonucleoprotein A OS=Homo sapiens OX=9606 GN=SNRPA PE=1 SV=3	2	8.25823e-05	0.000123306	0.00077157	0.00204472	0.669735	-0.578338
HNRNPH2	P55795	sp|P55795|HNRH2_HUMAN Heterogeneous nuclear ribonucleoprotein H2 OS=Homo sapiens OX=9606 GN=HNRNPH2 PE=1 SV=1	5	0.000102026	7.31129e-05	0.0346304	0.026026	1.39546	0.480743
MRPS6	P82932	sp|P82932|RT06_HUMAN 28S ribosomal protein S6, mitochondrial OS=Homo sapiens OX=9606 GN=MRPS6 PE=1 SV=3	4	6.18054e-05	0.000131952	0.00117928	0.00269837	0.468394	-1.09421
RIDA	P52758	sp|P52758|RIDA_HUMAN 2-iminobutanoate/2-iminopropanoate deaminase OS=Homo sapiens OX=9606 GN=RIDA PE=1 SV=1	2	7.93668e-05	0.000114919	0.0362033	0.0269004	0.690634	-0.534007
DCD	P81605	sp|P81605|DCD_HUMAN Dermcidin OS=Homo sapiens OX=9606 GN=DCD PE=1 SV=2	2	9.45009e-05	0.000169321	0.0011874	0.00270979	0.558116	-0.841363
CENPV	Q7Z7K6	sp|Q7Z7K6|CENPV_HUMAN Centromere protein V OS=Homo sapiens OX=9606 GN=CENPV PE=1 SV=1	5	0.000131232	8.29107e-05	0.0087664	0.00980499	1.58281	0.662486
ANXA1	P04083	sp|P04083|ANXA1_HUMAN Annexin A1 OS=Homo sapiens OX=9606 GN=ANXA1 PE=1 SV=2	9	0.000110012	8.74813e-05	0.0474616	0.0327853	1.25755	0.330619
PTTG1IP	P53801	sp|P53801|PTTG_HUMAN Pituitary tumor-transforming gene 1 protein-interacting protein OS=Homo sapiens OX=9606 GN=PTTG1IP PE=1 SV=1	1	7.22324e-05	0.000111884	0.0155189	0.0145473	0.645599	-0.631289
CYSTM1	Q9H1C7	sp|Q9H1C7|CYTM1_HUMAN Cysteine-rich and transmembrane domain-containing protein 1 OS=Homo sapiens OX=9606 GN=CYSTM1 PE=1 SV=1	1	7.46536e-05	9.55098e-05	0.0110211	0.0114577	0.781633	-0.355437
DHRS1	Q96LJ7	sp|Q96LJ7|DHRS1_HUMAN Dehydrogenase/reductase SDR family member 1 OS=Homo sapiens OX=9606 GN=DHRS1 PE=1 SV=1	6	8.44102e-05	0.000108409	0.00579717	0.0073888	0.778628	-0.360993
ATL3	Q6DD88	sp|Q6DD88|ATLA3_HUMAN Atlastin-3 OS=Homo sapiens OX=9606 GN=ATL3 PE=1 SV=1	10	0.000111515	7.56001e-05	0.00129619	0.002858	1.47507	0.56078
HMOX2	P30519	sp|P30519|HMOX2_HUMAN Heme oxygenase 2 OS=Homo sapiens OX=9606 GN=HMOX2 PE=1 SV=2	7	8.85966e-05	0.000108222	0.000487372	0.00159756	0.818656	-0.28867
TMEM41B	Q5BJD5	sp|Q5BJD5|TM41B_HUMAN Transmembrane protein 41B OS=Homo sapiens OX=9606 GN=TMEM41B PE=1 SV=1	3	3.25436e-05	0.000141209	0.0246452	0.0202431	0.230464	-2.11739
SLC39A14	Q15043	sp|Q15043|S39AE_HUMAN Zinc transporter ZIP14 OS=Homo sapiens OX=9606 GN=SLC39A14 PE=1 SV=3	3	7.82501e-05	0.000100509	0.00216793	0.00393663	0.77854	-0.361157
MANF	P55145	sp|P55145|MANF_HUMAN Mesencephalic astrocyte-derived neurotrophic factor OS=Homo sapiens OX=9606 GN=MANF PE=1 SV=3	6	9.66505e-05	7.61916e-05	0.0258873	0.0209855	1.26852	0.343146
NOP2	P46087	sp|P46087|NOP2_HUMAN Probable 28S rRNA (cytosine(4447)-C(5))-methyltransferase OS=Homo sapiens OX=9606 GN=NOP2 PE=1 SV=2	13	0.000106606	6.92066e-05	0.00173751	0.00341174	1.54041	0.623313
GNS	P15586	sp|P15586|GNS_HUMAN N-acetylglucosamine-6-sulfatase OS=Homo sapiens OX=9606 GN=GNS PE=1 SV=3	8	5.934e-05	0.000115914	0.000908329	0.00227894	0.511933	-0.965973
PEX11B	O96011	sp|O96011|PX11B_HUMAN Peroxisomal membrane protein 11B OS=Homo sapiens OX=9606 GN=PEX11B PE=1 SV=1	5	7.39242e-05	0.000119987	0.00274108	0.00457036	0.616103	-0.698757
GLDC	P23378	sp|P23378|GCSP_HUMAN Glycine dehydrogenase (decarboxylating), mitochondrial OS=Homo sapiens OX=9606 GN=GLDC PE=1 SV=2	17	7.44238e-05	0.000108398	0.00664216	0.00810647	0.686579	-0.542503
CD55	P08174	sp|P08174|DAF_HUMAN Complement decay-accelerating factor OS=Homo sapiens OX=9606 GN=CD55 PE=1 SV=4	6	7.51187e-05	0.000106776	0.00277735	0.00460699	0.703515	-0.507347
HK2	P52789	sp|P52789|HXK2_HUMAN Hexokinase-2 OS=Homo sapiens OX=9606 GN=HK2 PE=1 SV=2	19	4.24297e-05	0.000106276	7.04927e-05	0.000571242	0.39924	-1.32467
DNAJC19	Q96DA6	sp|Q96DA6|TIM14_HUMAN Mitochondrial import inner membrane translocase subunit TIM14 OS=Homo sapiens OX=9606 GN=DNAJC19 PE=1 SV=3	4	0.000129623	8.15594e-05	0.0389351	0.0283729	1.5893	0.668396
DHCR24	Q15392	sp|Q15392|DHC24_HUMAN Delta(24)-sterol reductase OS=Homo sapiens OX=9606 GN=DHCR24 PE=1 SV=2	3	6.58697e-05	0.000101785	0.00133827	0.00291323	0.647145	-0.62784
SLC25A15	Q9Y619	sp|Q9Y619|ORNT1_HUMAN Mitochondrial ornithine transporter 1 OS=Homo sapiens OX=9606 GN=SLC25A15 PE=1 SV=1	7	0.000105777	7.40641e-05	0.000118784	0.000757131	1.42818	0.51418
UBA1	P22314	sp|P22314|UBA1_HUMAN Ubiquitin-like modifier-activating enzyme 1 OS=Homo sapiens OX=9606 GN=UBA1 PE=1 SV=3	21	0.000101478	8.1487e-05	0.0185928	0.0164488	1.24532	0.316519
DPH5	Q9H2P9	sp|Q9H2P9|DPH5_HUMAN Diphthine methyl ester synthase OS=Homo sapiens OX=9606 GN=DPH5 PE=1 SV=2	1	2.80453e-05	0.000128686	0.00347868	0.00537101	0.217937	-2.19802
SNX2	O60749	sp|O60749|SNX2_HUMAN Sorting nexin-2 OS=Homo sapiens OX=9606 GN=SNX2 PE=1 SV=2	10	0.000111875	7.09934e-05	0.00012407	0.000775188	1.57585	0.656128
COLGALT1	Q8NBJ5	sp|Q8NBJ5|GT251_HUMAN Procollagen galactosyltransferase 1 OS=Homo sapiens OX=9606 GN=COLGALT1 PE=1 SV=1	14	7.0497e-05	0.00010876	0.000200729	0.000999162	0.648189	-0.625513
SLC35B2	Q8TB61	sp|Q8TB61|S35B2_HUMAN Adenosine 3-phospho 5-phosphosulfate transporter 1 OS=Homo sapiens OX=9606 GN=SLC35B2 PE=1 SV=1	6	7.20519e-05	9.54832e-05	0.000144536	0.000838852	0.754603	-0.406211
LMO7	Q8WWI1	sp|Q8WWI1|LMO7_HUMAN LIM domain only protein 7 OS=Homo sapiens OX=9606 GN=LMO7 PE=1 SV=3	32	0.000101763	6.61264e-05	0.0154807	0.0145222	1.53891	0.621912
PIGU	Q9H490	sp|Q9H490|PIGU_HUMAN Phosphatidylinositol glycan anchor biosynthesis class U protein OS=Homo sapiens OX=9606 GN=PIGU PE=1 SV=3	3	0.00010994	6.40332e-05	0.000768801	0.00204041	1.71692	0.779826
ATP6V0D1	P61421	sp|P61421|VA0D1_HUMAN V-type proton ATPase subunit d 1 OS=Homo sapiens OX=9606 GN=ATP6V0D1 PE=1 SV=1	6	6.416e-05	0.000101967	0.0193677	0.0168949	0.629225	-0.668351
ATAD1	Q8NBU5	sp|Q8NBU5|ATAD1_HUMAN ATPase family AAA domain-containing protein 1 OS=Homo sapiens OX=9606 GN=ATAD1 PE=1 SV=1	7	5.48752e-05	8.36351e-05	0.0033531	0.00523999	0.656127	-0.607953
SEC62	Q99442	sp|Q99442|SEC62_HUMAN Translocation protein SEC62 OS=Homo sapiens OX=9606 GN=SEC62 PE=1 SV=1	5	3.0445e-05	0.00013444	0.00951644	0.0103717	0.226457	-2.14269
LRRC1	Q9BTT6	sp|Q9BTT6|LRRC1_HUMAN Leucine-rich repeat-containing protein 1 OS=Homo sapiens OX=9606 GN=LRRC1 PE=1 SV=1	8	0.0001093	6.62467e-05	0.00891396	0.00991883	1.64989	0.722366
TMED1	Q13445	sp|Q13445|TMED1_HUMAN Transmembrane emp24 domain-containing protein 1 OS=Homo sapiens OX=9606 GN=TMED1 PE=1 SV=1	3	7.18219e-05	9.6192e-05	0.000720224	0.00196371	0.746651	-0.421494
SARNP	P82979	sp|P82979|SARNP_HUMAN SAP domain-containing ribonucleoprotein OS=Homo sapiens OX=9606 GN=SARNP PE=1 SV=3	2	9.89129e-05	7.61069e-05	0.00123744	0.00277894	1.29966	0.378132
PNPO	Q9NVS9	sp|Q9NVS9|PNPO_HUMAN Pyridoxine-5-phosphate oxidase OS=Homo sapiens OX=9606 GN=PNPO PE=1 SV=1	7	0.000101075	5.82911e-05	0.0258682	0.0209743	1.73397	0.794076
CAPNS1	P04632	sp|P04632|CPNS1_HUMAN Calpain small subunit 1 OS=Homo sapiens OX=9606 GN=CAPNS1 PE=1 SV=1	6	9.89517e-05	6.6562e-05	0.0056245	0.00723654	1.48661	0.572024
ALDH1B1	P30837	sp|P30837|AL1B1_HUMAN Aldehyde dehydrogenase X, mitochondrial OS=Homo sapiens OX=9606 GN=ALDH1B1 PE=1 SV=3	9	5.87255e-05	8.18333e-05	0.0124443	0.0124111	0.717624	-0.4787
GNPAT	O15228	sp|O15228|GNPAT_HUMAN Dihydroxyacetone phosphate acyltransferase OS=Homo sapiens OX=9606 GN=GNPAT PE=1 SV=1	13	7.17071e-05	9.12422e-05	0.0029543	0.00480195	0.785899	-0.347584
EDF1	O60869	sp|O60869|EDF1_HUMAN Endothelial differentiation-related factor 1 OS=Homo sapiens OX=9606 GN=EDF1 PE=1 SV=1	2	0.00012718	7.33567e-05	6.26875e-05	0.000546601	1.73372	0.793868
SLC25A4	P12235	sp|P12235|ADT1_HUMAN ADP/ATP translocase 1 OS=Homo sapiens OX=9606 GN=SLC25A4 PE=1 SV=4	6	9.45855e-05	3.22253e-05	0.00241935	0.004228	2.93513	1.55342
PIGS	Q96S52	sp|Q96S52|PIGS_HUMAN GPI transamidase component PIG-S OS=Homo sapiens OX=9606 GN=PIGS PE=1 SV=3	8	9.98362e-05	6.81119e-05	0.0152485	0.0143691	1.46577	0.551656
NFS1	Q9Y697	sp|Q9Y697|NFS1_HUMAN Cysteine desulfurase, mitochondrial OS=Homo sapiens OX=9606 GN=NFS1 PE=1 SV=3	9	4.6112e-05	0.000107724	0.000126775	0.000784155	0.428056	-1.22413
DECR2	Q9NUI1	sp|Q9NUI1|DECR2_HUMAN Peroxisomal 2,4-dienoyl-CoA reductase OS=Homo sapiens OX=9606 GN=DECR2 PE=1 SV=1	5	6.50263e-05	0.000108041	0.0140632	0.0135655	0.601865	-0.732489
MRPL11	Q9Y3B7	sp|Q9Y3B7|RM11_HUMAN 39S ribosomal protein L11, mitochondrial OS=Homo sapiens OX=9606 GN=MRPL11 PE=1 SV=1	7	6.92086e-05	9.60691e-05	0.0031091	0.00497609	0.720404	-0.473121
RPS10	P46783	sp|P46783|RS10_HUMAN 40S ribosomal protein S10 OS=Homo sapiens OX=9606 GN=RPS10 PE=1 SV=1;sp|Q9NQ39|RS10L_HUMAN Putative 40S ribosomal protein S10-like OS=Homo sapiens OX=9606 GN=RPS10P5 PE=5 SV=1	5	0.000145232	3.00905e-05	0.00585806	0.00744181	4.8265	2.27098
SEC63	Q9UGP8	sp|Q9UGP8|SEC63_HUMAN Translocation protein SEC63 homolog OS=Homo sapiens OX=9606 GN=SEC63 PE=1 SV=2	17	6.72768e-05	8.25336e-05	0.0480709	0.0331035	0.815144	-0.294874
SPATA20	Q8TB22	sp|Q8TB22|SPT20_HUMAN Spermatogenesis-associated protein 20 OS=Homo sapiens OX=9606 GN=SPATA20 PE=2 SV=3	16	5.42624e-05	9.69923e-05	0.00127823	0.002834	0.559451	-0.837917
FAM3C	Q92520	sp|Q92520|FAM3C_HUMAN Protein FAM3C OS=Homo sapiens OX=9606 GN=FAM3C PE=1 SV=1	6	5.66269e-05	0.000103964	0.0334584	0.0253613	0.544678	-0.876524
FABP5	Q01469	sp|Q01469|FABP5_HUMAN Fatty acid-binding protein 5 OS=Homo sapiens OX=9606 GN=FABP5 PE=1 SV=3	3	9.54828e-05	4.72844e-05	0.000276181	0.00117557	2.01933	1.01388
IDI1	Q13907	sp|Q13907|IDI1_HUMAN Isopentenyl-diphosphate Delta-isomerase 1 OS=Homo sapiens OX=9606 GN=IDI1 PE=1 SV=2	3	5.34996e-05	0.000104572	0.0159774	0.0148452	0.511605	-0.966899
SPRYD4	Q8WW59	sp|Q8WW59|SPRY4_HUMAN SPRY domain-containing protein 4 OS=Homo sapiens OX=9606 GN=SPRYD4 PE=1 SV=2	5	6.38463e-05	9.12611e-05	0.00139707	0.00299326	0.699601	-0.515397
MT-ATP8	P03928	sp|P03928|ATP8_HUMAN ATP synthase protein 8 OS=Homo sapiens OX=9606 GN=MT-ATP8 PE=1 SV=1	1	7.9206e-05	0.00010373	0.0111037	0.0115153	0.763578	-0.389152
PNN	Q9H307	sp|Q9H307|PININ_HUMAN Pinin OS=Homo sapiens OX=9606 GN=PNN PE=1 SV=5	10	8.98468e-05	5.70327e-05	0.0136944	0.0133075	1.57536	0.655678
HLA-C	P30504	sp|P30504|1C04_HUMAN HLA class I histocompatibility antigen, Cw-4 alpha chain OS=Homo sapiens OX=9606 GN=HLA-C PE=1 SV=1;sp|Q29865|1C18_HUMAN HLA class I histocompatibility antigen, Cw-18 alpha chain OS=Homo sapiens OX=9606 GN=HLA-C PE=1 SV=1;sp|P30510|1C1	2	8.52338e-06	0.00014147	0.00234363	0.00414258	0.0602486	-4.05293
PDK1	Q15118	sp|Q15118|PDK1_HUMAN [Pyruvate dehydrogenase (acetyl-transferring)] kinase isozyme 1, mitochondrial OS=Homo sapiens OX=9606 GN=PDK1 PE=1 SV=1	9	5.81617e-05	9.4217e-05	0.00283749	0.00466691	0.617317	-0.695917
GRPEL1	Q9HAV7	sp|Q9HAV7|GRPE1_HUMAN GrpE protein homolog 1, mitochondrial OS=Homo sapiens OX=9606 GN=GRPEL1 PE=1 SV=2	3	6.59497e-05	0.000115206	0.000972353	0.00238519	0.572449	-0.804781
SLCO2B1	O94956	sp|O94956|SO2B1_HUMAN Solute carrier organic anion transporter family member 2B1 OS=Homo sapiens OX=9606 GN=SLCO2B1 PE=1 SV=2	4	4.14005e-05	0.000113598	0.000237974	0.00109313	0.364447	-1.45622
SUMF2	Q8NBJ7	sp|Q8NBJ7|SUMF2_HUMAN Inactive C-alpha-formylglycine-generating enzyme 2 OS=Homo sapiens OX=9606 GN=SUMF2 PE=1 SV=2	5	4.48812e-05	0.000101791	0.0121104	0.0121945	0.440917	-1.18142
ACSS1	Q9NUB1	sp|Q9NUB1|ACS2L_HUMAN Acetyl-coenzyme A synthetase 2-like, mitochondrial OS=Homo sapiens OX=9606 GN=ACSS1 PE=1 SV=2	13	5.46567e-05	8.99918e-05	0.0117469	0.0119538	0.607351	-0.719397
CLINT1	Q14677	sp|Q14677|EPN4_HUMAN Clathrin interactor 1 OS=Homo sapiens OX=9606 GN=CLINT1 PE=1 SV=1	7	7.148e-05	9.08027e-05	0.00840902	0.0095272	0.787201	-0.345196
PTCD3	Q96EY7	sp|Q96EY7|PTCD3_HUMAN Pentatricopeptide repeat domain-containing protein 3, mitochondrial OS=Homo sapiens OX=9606 GN=PTCD3 PE=1 SV=3	9	2.52158e-05	3.91943e-05	0.0142715	0.0137094	0.643355	-0.636314
CTSZ	Q9UBR2	sp|Q9UBR2|CATZ_HUMAN Cathepsin Z OS=Homo sapiens OX=9606 GN=CTSZ PE=1 SV=1	4	7.79869e-05	0.000124619	0.000254274	0.00112985	0.6258	-0.676225
LRPAP1	P30533	sp|P30533|AMRP_HUMAN Alpha-2-macroglobulin receptor-associated protein OS=Homo sapiens OX=9606 GN=LRPAP1 PE=1 SV=1	10	4.93057e-05	9.31017e-05	0.000180625	0.000941599	0.52959	-0.917052
ELOB	Q15370	sp|Q15370|ELOB_HUMAN Elongin-B OS=Homo sapiens OX=9606 GN=ELOB PE=1 SV=1	4	5.71315e-05	8.0789e-05	0.00427444	0.00613337	0.70717	-0.499871
SEPT11	Q9NVA2	sp|Q9NVA2|SEP11_HUMAN Septin-11 OS=Homo sapiens OX=9606 GN=SEPT11 PE=1 SV=3	4	8.20458e-05	6.53183e-05	0.00116399	0.00267666	1.25609	0.328942
COX7A2L	O14548	sp|O14548|COX7R_HUMAN Cytochrome c oxidase subunit 7A-related protein, mitochondrial OS=Homo sapiens OX=9606 GN=COX7A2L PE=1 SV=2	2	5.48977e-05	9.11026e-05	8.37572e-06	0.00022774	0.602592	-0.730747
NDUFA9	Q16795	sp|Q16795|NDUA9_HUMAN NADH dehydrogenase [ubiquinone] 1 alpha subcomplex subunit 9, mitochondrial OS=Homo sapiens OX=9606 GN=NDUFA9 PE=1 SV=2	7	9.39606e-05	6.0217e-05	0.0302083	0.0235403	1.56037	0.641885
OCLN	Q16625	sp|Q16625|OCLN_HUMAN Occludin OS=Homo sapiens OX=9606 GN=OCLN PE=1 SV=1	4	5.59322e-05	8.41581e-05	0.00373011	0.00562412	0.664609	-0.589423
NAP1L4	Q99733	sp|Q99733|NP1L4_HUMAN Nucleosome assembly protein 1-like 4 OS=Homo sapiens OX=9606 GN=NAP1L4 PE=1 SV=1	7	9.99551e-05	6.60913e-05	0.0107646	0.0112773	1.51238	0.59682
DNAJB11	Q9UBS4	sp|Q9UBS4|DJB11_HUMAN DnaJ homolog subfamily B member 11 OS=Homo sapiens OX=9606 GN=DNAJB11 PE=1 SV=1	6	6.24002e-05	8.82609e-05	0.000704667	0.00193926	0.706996	-0.500225
SLC30A1	Q9Y6M5	sp|Q9Y6M5|ZNT1_HUMAN Zinc transporter 1 OS=Homo sapiens OX=9606 GN=SLC30A1 PE=1 SV=3	6	6.84083e-05	8.46158e-05	0.000124165	0.000775506	0.808457	-0.306756
CNBP	P62633	sp|P62633|CNBP_HUMAN Cellular nucleic acid-binding protein OS=Homo sapiens OX=9606 GN=CNBP PE=1 SV=1	4	6.53913e-05	9.0635e-05	0.00783632	0.00906855	0.72148	-0.470969
ANXA6	P08133	sp|P08133|ANXA6_HUMAN Annexin A6 OS=Homo sapiens OX=9606 GN=ANXA6 PE=1 SV=3	18	8.41311e-05	6.10811e-05	0.0203405	0.0175182	1.37737	0.461914
TSPAN13	O95857	sp|O95857|TSN13_HUMAN Tetraspanin-13 OS=Homo sapiens OX=9606 GN=TSPAN13 PE=2 SV=1	3	5.5833e-05	0.000107416	0.0115278	0.0118063	0.519783	-0.94402
MT-ND1	P03886	sp|P03886|NU1M_HUMAN NADH-ubiquinone oxidoreductase chain 1 OS=Homo sapiens OX=9606 GN=MT-ND1 PE=1 SV=1	2	9.24209e-05	5.04914e-05	0.00330646	0.00519051	1.83043	0.87218
SDHD	O14521	sp|O14521|DHSD_HUMAN Succinate dehydrogenase [ubiquinone] cytochrome b small subunit, mitochondrial OS=Homo sapiens OX=9606 GN=SDHD PE=1 SV=1	2	0.000152494	1.46411e-05	0.005723	0.00732375	10.4155	3.38066
NUMA1	Q14980	sp|Q14980|NUMA1_HUMAN Nuclear mitotic apparatus protein 1 OS=Homo sapiens OX=9606 GN=NUMA1 PE=1 SV=2	48	6.65547e-05	8.26223e-05	0.0157555	0.0147017	0.80553	-0.31199
P2RX4	Q99571	sp|Q99571|P2RX4_HUMAN P2X purinoceptor 4 OS=Homo sapiens OX=9606 GN=P2RX4 PE=1 SV=2	8	5.56933e-05	8.78848e-05	2.62686e-05	0.000374343	0.633708	-0.658111
UFL1	O94874	sp|O94874|UFL1_HUMAN E3 UFM1-protein ligase 1 OS=Homo sapiens OX=9606 GN=UFL1 PE=1 SV=2	14	8.47016e-05	5.03591e-05	0.000257713	0.00113729	1.68195	0.750137
RTN1	Q16799	sp|Q16799|RTN1_HUMAN Reticulon-1 OS=Homo sapiens OX=9606 GN=RTN1 PE=1 SV=1	2	5.3062e-05	8.91978e-05	8.33261e-05	0.000614353	0.594881	-0.749328
EIF1AX	P47813	sp|P47813|IF1AX_HUMAN Eukaryotic translation initiation factor 1A, X-chromosomal OS=Homo sapiens OX=9606 GN=EIF1AX PE=1 SV=2;sp|O14602|IF1AY_HUMAN Eukaryotic translation initiation factor 1A, Y-chromosomal OS=Homo sapiens OX=9606 GN=EIF1AY PE=1 SV=4	2	8.51861e-05	1.57505e-05	4.36055e-06	0.000179943	5.40847	2.43522
MRPS27	Q92552	sp|Q92552|RT27_HUMAN 28S ribosomal protein S27, mitochondrial OS=Homo sapiens OX=9606 GN=MRPS27 PE=1 SV=3	9	5.10438e-05	7.59326e-05	3.8576e-05	0.00044413	0.672226	-0.572982
RBM14	Q96PK6	sp|Q96PK6|RBM14_HUMAN RNA-binding protein 14 OS=Homo sapiens OX=9606 GN=RBM14 PE=1 SV=2	7	5.88438e-05	7.2102e-05	0.0296239	0.023202	0.816119	-0.293148
CXADR	P78310	sp|P78310|CXAR_HUMAN Coxsackievirus and adenovirus receptor OS=Homo sapiens OX=9606 GN=CXADR PE=1 SV=1	7	5.16094e-05	7.95915e-05	0.00245946	0.00427247	0.648429	-0.62498
TIMM22	Q9Y584	sp|Q9Y584|TIM22_HUMAN Mitochondrial import inner membrane translocase subunit Tim22 OS=Homo sapiens OX=9606 GN=TIMM22 PE=1 SV=2	1	5.28086e-05	6.88288e-05	0.0191046	0.0167448	0.767245	-0.38224
NCBP2-AS2	Q69YL0	sp|Q69YL0|NCAS2_HUMAN Uncharacterized protein NCBP2-AS2 OS=Homo sapiens OX=9606 GN=NCBP2-AS2 PE=1 SV=1	2	4.29051e-05	8.18277e-05	0.00232627	0.00412273	0.524335	-0.931439
COPB1	P53618	sp|P53618|COPB_HUMAN Coatomer subunit beta OS=Homo sapiens OX=9606 GN=COPB1 PE=1 SV=3	16	7.16816e-05	5.75917e-05	0.0408212	0.0293569	1.24465	0.315743
AGPAT2	O15120	sp|O15120|PLCB_HUMAN 1-acyl-sn-glycerol-3-phosphate acyltransferase beta OS=Homo sapiens OX=9606 GN=AGPAT2 PE=1 SV=1	3	8.17383e-05	5.65338e-05	0.00428738	0.00614488	1.44583	0.5319
MTHFD1	P11586	sp|P11586|C1TC_HUMAN C-1-tetrahydrofolate synthase, cytoplasmic OS=Homo sapiens OX=9606 GN=MTHFD1 PE=1 SV=3	21	8.19916e-05	6.6102e-05	0.0220973	0.018657	1.24038	0.310783
PCCB	P05166	sp|P05166|PCCB_HUMAN Propionyl-CoA carboxylase beta chain, mitochondrial OS=Homo sapiens OX=9606 GN=PCCB PE=1 SV=3	9	5.40788e-05	7.65104e-05	0.0177599	0.015955	0.706816	-0.500593
RPA3	P35244	sp|P35244|RFA3_HUMAN Replication protein A 14 kDa subunit OS=Homo sapiens OX=9606 GN=RPA3 PE=1 SV=1	4	7.39833e-05	3.5437e-05	0.00426095	0.00612135	2.08774	1.06194
ADAM10	O14672	sp|O14672|ADA10_HUMAN Disintegrin and metalloproteinase domain-containing protein 10 OS=Homo sapiens OX=9606 GN=ADAM10 PE=1 SV=1	9	5.81361e-05	7.8108e-05	0.0186343	0.016473	0.744304	-0.426035
YARS2	Q9Y2Z4	sp|Q9Y2Z4|SYYM_HUMAN Tyrosine--tRNA ligase, mitochondrial OS=Homo sapiens OX=9606 GN=YARS2 PE=1 SV=2	7	7.66459e-05	6.27766e-05	0.0347582	0.0260978	1.22093	0.287982
ELMOD2	Q8IZ81	sp|Q8IZ81|ELMD2_HUMAN ELMO domain-containing protein 2 OS=Homo sapiens OX=9606 GN=ELMOD2 PE=1 SV=1	4	0.000113485	2.46152e-05	1.58947e-05	0.000293181	4.61036	2.20488
MICU2	Q8IYU8	sp|Q8IYU8|MICU2_HUMAN Calcium uptake protein 2, mitochondrial OS=Homo sapiens OX=9606 GN=MICU2 PE=1 SV=2	5	5.03094e-05	7.35739e-05	0.00648179	0.00797427	0.683795	-0.548364
TMEM126A	Q9H061	sp|Q9H061|T126A_HUMAN Transmembrane protein 126A OS=Homo sapiens OX=9606 GN=TMEM126A PE=1 SV=1	3	8.59173e-05	6.55122e-05	0.0108779	0.0113573	1.31147	0.391184
SARS2	Q9NP81	sp|Q9NP81|SYSM_HUMAN Serine--tRNA ligase, mitochondrial OS=Homo sapiens OX=9606 GN=SARS2 PE=1 SV=1	8	5.10672e-05	8.72208e-05	0.0104692	0.0110659	0.585494	-0.772274
HACD2	Q6Y1H2	sp|Q6Y1H2|HACD2_HUMAN Very-long-chain (3R)-3-hydroxyacyl-CoA dehydratase 2 OS=Homo sapiens OX=9606 GN=HACD2 PE=1 SV=1	1	3.43759e-05	5.61404e-05	8.19134e-05	0.000608001	0.612321	-0.707639
SF3B6	Q9Y3B4	sp|Q9Y3B4|SF3B6_HUMAN Splicing factor 3B subunit 6 OS=Homo sapiens OX=9606 GN=SF3B6 PE=1 SV=1	3	4.78587e-05	7.99286e-05	1.12639e-05	0.000252906	0.598769	-0.739929
FGG	P02679	sp|P02679|FIBG_HUMAN Fibrinogen gamma chain OS=Homo sapiens OX=9606 GN=FGG PE=1 SV=3	1	1.56225e-05	4.65351e-05	0.00029337	0.00120884	0.335715	-1.57469
CAPZA1	P52907	sp|P52907|CAZA1_HUMAN F-actin-capping protein subunit alpha-1 OS=Homo sapiens OX=9606 GN=CAPZA1 PE=1 SV=3	4	7.18359e-05	4.22869e-05	0.0362432	0.0269223	1.69878	0.764496
CD276	Q5ZPR3	sp|Q5ZPR3|CD276_HUMAN CD276 antigen OS=Homo sapiens OX=9606 GN=CD276 PE=1 SV=1	4	3.25237e-05	8.16936e-05	0.00232937	0.00412629	0.398119	-1.32873
RMDN3	Q96TC7	sp|Q96TC7|RMD3_HUMAN Regulator of microtubule dynamics protein 3 OS=Homo sapiens OX=9606 GN=RMDN3 PE=1 SV=2	10	7.50551e-05	5.17495e-05	0.00117138	0.00268717	1.45035	0.536405
GOLM1	Q8NBJ4	sp|Q8NBJ4|GOLM1_HUMAN Golgi membrane protein 1 OS=Homo sapiens OX=9606 GN=GOLM1 PE=1 SV=1	8	3.06889e-05	9.87156e-05	2.13038e-05	0.000339231	0.310882	-1.68556
RPL21	P46778	sp|P46778|RL21_HUMAN 60S ribosomal protein L21 OS=Homo sapiens OX=9606 GN=RPL21 PE=1 SV=2	4	8.98268e-05	3.77812e-05	4.31336e-05	0.000466628	2.37755	1.24948
TAPBP	O15533	sp|O15533|TPSN_HUMAN Tapasin OS=Homo sapiens OX=9606 GN=TAPBP PE=1 SV=1	3	3.05342e-05	8.36892e-05	4.72743e-05	0.000484997	0.364853	-1.45461
RAB21	Q9UL25	sp|Q9UL25|RAB21_HUMAN Ras-related protein Rab-21 OS=Homo sapiens OX=9606 GN=RAB21 PE=1 SV=3	6	6.44878e-05	0.000108447	0.0194684	0.0169519	0.594649	-0.749889
ARPC5	O15511	sp|O15511|ARPC5_HUMAN Actin-related protein 2/3 complex subunit 5 OS=Homo sapiens OX=9606 GN=ARPC5 PE=1 SV=3	3	9.19813e-05	2.64543e-05	1.17353e-06	0.000101261	3.47699	1.79784
LSR	Q86X29	sp|Q86X29|LSR_HUMAN Lipolysis-stimulated lipoprotein receptor OS=Homo sapiens OX=9606 GN=LSR PE=1 SV=4	9	4.43425e-05	8.30156e-05	0.000686505	0.00191188	0.534146	-0.904695
NDUFB11	Q9NX14	sp|Q9NX14|NDUBB_HUMAN NADH dehydrogenase [ubiquinone] 1 beta subcomplex subunit 11, mitochondrial OS=Homo sapiens OX=9606 GN=NDUFB11 PE=1 SV=1	2	4.55001e-05	5.73181e-05	0.0399156	0.0288877	0.793817	-0.333122
SCO1	O75880	sp|O75880|SCO1_HUMAN Protein SCO1 homolog, mitochondrial OS=Homo sapiens OX=9606 GN=SCO1 PE=1 SV=1	4	2.48393e-05	8.57257e-05	0.000679356	0.00190201	0.289754	-1.7871
PRRC1	Q96M27	sp|Q96M27|PRRC1_HUMAN Protein PRRC1 OS=Homo sapiens OX=9606 GN=PRRC1 PE=1 SV=1	4	7.34934e-05	5.2607e-05	0.000302491	0.00122633	1.39703	0.482359
PDLIM1	O00151	sp|O00151|PDLI1_HUMAN PDZ and LIM domain protein 1 OS=Homo sapiens OX=9606 GN=PDLIM1 PE=1 SV=4	5	8.44466e-05	5.3859e-05	0.00266126	0.00448839	1.56792	0.648851
PEX11G	Q96HA9	sp|Q96HA9|PX11C_HUMAN Peroxisomal membrane protein 11C OS=Homo sapiens OX=9606 GN=PEX11G PE=1 SV=1	3	6.12789e-05	7.63142e-05	0.0350195	0.0262441	0.802982	-0.31656
THOC6	Q86W42	sp|Q86W42|THOC6_HUMAN THO complex subunit 6 homolog OS=Homo sapiens OX=9606 GN=THOC6 PE=1 SV=1	5	4.36919e-05	6.28483e-05	0.000198553	0.000993183	0.695196	-0.524509
CD46	P15529	sp|P15529|MCP_HUMAN Membrane cofactor protein OS=Homo sapiens OX=9606 GN=CD46 PE=1 SV=3	4	4.35879e-05	7.07203e-05	0.0224567	0.018886	0.616342	-0.698197
CLPTM1	O96005	sp|O96005|CLPT1_HUMAN Cleft lip and palate transmembrane protein 1 OS=Homo sapiens OX=9606 GN=CLPTM1 PE=1 SV=1	11	5.08767e-05	7.75404e-05	0.0139071	0.0134567	0.656132	-0.607942
MYDGF	Q969H8	sp|Q969H8|MYDGF_HUMAN Myeloid-derived growth factor OS=Homo sapiens OX=9606 GN=MYDGF PE=1 SV=1	1	5.31737e-05	7.03068e-05	0.0164667	0.0151573	0.75631	-0.40295
SPINT2	O43291	sp|O43291|SPIT2_HUMAN Kunitz-type protease inhibitor 2 OS=Homo sapiens OX=9606 GN=SPINT2 PE=1 SV=2	4	1.96526e-05	0.000106323	7.8385e-05	0.000592854	0.184839	-2.43566
SUPV3L1	Q8IYB8	sp|Q8IYB8|SUV3_HUMAN ATP-dependent RNA helicase SUPV3L1, mitochondrial OS=Homo sapiens OX=9606 GN=SUPV3L1 PE=1 SV=1	8	5.15561e-05	6.63336e-05	0.00183643	0.00352097	0.777226	-0.363595
GALNT3	Q14435	sp|Q14435|GALT3_HUMAN Polypeptide N-acetylgalactosaminyltransferase 3 OS=Homo sapiens OX=9606 GN=GALNT3 PE=1 SV=2	7	4.14674e-05	6.70402e-05	0.00123789	0.00277956	0.618545	-0.693049
FTSJ3	Q8IY81	sp|Q8IY81|SPB1_HUMAN pre-rRNA processing protein FTSJ3 OS=Homo sapiens OX=9606 GN=FTSJ3 PE=1 SV=2	12	4.6526e-05	6.91259e-05	0.000341282	0.0013135	0.673061	-0.57119
CPS1	P31327	sp|P31327|CPSM_HUMAN Carbamoyl-phosphate synthase [ammonia], mitochondrial OS=Homo sapiens OX=9606 GN=CPS1 PE=1 SV=2	28	4.20415e-05	7.10181e-05	0.000149006	0.000851568	0.591983	-0.756373
MT-CO1	P00395	sp|P00395|COX1_HUMAN Cytochrome c oxidase subunit 1 OS=Homo sapiens OX=9606 GN=MT-CO1 PE=1 SV=1	2	0.000147836	3.06008e-08	0.0254542	0.0207289	4831.11	12.2381
PMPCB	O75439	sp|O75439|MPPB_HUMAN Mitochondrial-processing peptidase subunit beta OS=Homo sapiens OX=9606 GN=PMPCB PE=1 SV=2	8	3.25806e-05	9.56737e-05	0.000708878	0.00194592	0.340539	-1.55411
CDIPT	O14735	sp|O14735|CDIPT_HUMAN CDP-diacylglycerol--inositol 3-phosphatidyltransferase OS=Homo sapiens OX=9606 GN=CDIPT PE=1 SV=1	2	6.29737e-05	4.7105e-05	0.0310136	0.024001	1.33688	0.41887
CPD	O75976	sp|O75976|CBPD_HUMAN Carboxypeptidase D OS=Homo sapiens OX=9606 GN=CPD PE=1 SV=2	20	3.54194e-05	7.58576e-05	1.51541e-05	0.000286355	0.46692	-1.09875
ASGR1	P07306	sp|P07306|ASGR1_HUMAN Asialoglycoprotein receptor 1 OS=Homo sapiens OX=9606 GN=ASGR1 PE=1 SV=2	7	4.82939e-05	8.10283e-05	1.23474e-05	0.000260487	0.596013	-0.746585
MAN2A1	Q16706	sp|Q16706|MA2A1_HUMAN Alpha-mannosidase 2 OS=Homo sapiens OX=9606 GN=MAN2A1 PE=1 SV=2	18	4.70313e-05	5.93996e-05	0.0129449	0.0127716	0.791778	-0.336832
NUP155	O75694	sp|O75694|NU155_HUMAN Nuclear pore complex protein Nup155 OS=Homo sapiens OX=9606 GN=NUP155 PE=1 SV=1	16	7.03097e-05	5.42602e-05	0.00731334	0.00863764	1.29579	0.37383
BCAS2	O75934	sp|O75934|SPF27_HUMAN Pre-mRNA-splicing factor SPF27 OS=Homo sapiens OX=9606 GN=BCAS2 PE=1 SV=1	5	8.75263e-05	3.10718e-05	0.00545437	0.00708429	2.8169	1.49411
UGGT1	Q9NYU2	sp|Q9NYU2|UGGG1_HUMAN UDP-glucose:glycoprotein glucosyltransferase 1 OS=Homo sapiens OX=9606 GN=UGGT1 PE=1 SV=3	22	4.44704e-05	6.39176e-05	0.0377371	0.0277342	0.695746	-0.523368
MRPS26	Q9BYN8	sp|Q9BYN8|RT26_HUMAN 28S ribosomal protein S26, mitochondrial OS=Homo sapiens OX=9606 GN=MRPS26 PE=1 SV=1	5	3.76915e-05	5.41471e-05	0.0118286	0.0120084	0.696094	-0.522646
L2HGDH	Q9H9P8	sp|Q9H9P8|L2HDH_HUMAN L-2-hydroxyglutarate dehydrogenase, mitochondrial OS=Homo sapiens OX=9606 GN=L2HGDH PE=1 SV=3	11	6.55691e-05	4.89837e-05	0.00842313	0.00953825	1.33859	0.420714
USP14	P54578	sp|P54578|UBP14_HUMAN Ubiquitin carboxyl-terminal hydrolase 14 OS=Homo sapiens OX=9606 GN=USP14 PE=1 SV=3	10	5.02182e-05	6.16449e-05	0.0415266	0.0297183	0.814636	-0.295773
CRABP1	P29762	sp|P29762|RABP1_HUMAN Cellular retinoic acid-binding protein 1 OS=Homo sapiens OX=9606 GN=CRABP1 PE=1 SV=2	4	8.2937e-05	4.74094e-05	0.00023815	0.00109354	1.74938	0.806844
ALG5	Q9Y673	sp|Q9Y673|ALG5_HUMAN Dolichyl-phosphate beta-glucosyltransferase OS=Homo sapiens OX=9606 GN=ALG5 PE=1 SV=1	4	5.98668e-05	4.92877e-05	0.0246423	0.0202414	1.21464	0.280528
GNL3	Q9BVP2	sp|Q9BVP2|GNL3_HUMAN Guanine nucleotide-binding protein-like 3 OS=Homo sapiens OX=9606 GN=GNL3 PE=1 SV=2	10	7.01707e-05	5.44045e-05	0.00456556	0.00638603	1.2898	0.367145
MRPL21	Q7Z2W9	sp|Q7Z2W9|RM21_HUMAN 39S ribosomal protein L21, mitochondrial OS=Homo sapiens OX=9606 GN=MRPL21 PE=1 SV=2	3	3.52063e-05	7.53582e-05	0.0146085	0.0139398	0.467186	-1.09793
SDHC	Q99643	sp|Q99643|C560_HUMAN Succinate dehydrogenase cytochrome b560 subunit, mitochondrial OS=Homo sapiens OX=9606 GN=SDHC PE=1 SV=1	3	7.6998e-05	2.27776e-05	0.000429908	0.0014894	3.38042	1.7572
PARL	Q9H300	sp|Q9H300|PARL_HUMAN Presenilins-associated rhomboid-like protein, mitochondrial OS=Homo sapiens OX=9606 GN=PARL PE=1 SV=2	1	3.41761e-05	5.01002e-05	0.0294329	0.0230907	0.682156	-0.551827
STX12	Q86Y82	sp|Q86Y82|STX12_HUMAN Syntaxin-12 OS=Homo sapiens OX=9606 GN=STX12 PE=1 SV=1	6	4.67341e-05	7.21202e-05	0.00255937	0.00438096	0.648003	-0.625927
COPG1	Q9Y678	sp|Q9Y678|COPG1_HUMAN Coatomer subunit gamma-1 OS=Homo sapiens OX=9606 GN=COPG1 PE=1 SV=1	15	5.91295e-05	4.11275e-05	6.45677e-05	0.000552873	1.43771	0.523775
SRSF5	Q13243	sp|Q13243|SRSF5_HUMAN Serine/arginine-rich splicing factor 5 OS=Homo sapiens OX=9606 GN=SRSF5 PE=1 SV=1	3	3.22167e-05	5.95161e-05	0.0245677	0.0201961	0.541311	-0.885471
MRPS35	P82673	sp|P82673|RT35_HUMAN 28S ribosomal protein S35, mitochondrial OS=Homo sapiens OX=9606 GN=MRPS35 PE=1 SV=1	6	6.10883e-05	4.33898e-05	0.00980814	0.0105844	1.4079	0.493541
OXA1L	Q15070	sp|Q15070|OXA1L_HUMAN Mitochondrial inner membrane protein OXA1L OS=Homo sapiens OX=9606 GN=OXA1L PE=1 SV=3	4	4.4191e-05	6.65652e-05	0.000544393	0.00169396	0.663875	-0.591016
APOOL	Q6UXV4	sp|Q6UXV4|MIC27_HUMAN MICOS complex subunit MIC27 OS=Homo sapiens OX=9606 GN=APOOL PE=1 SV=1	5	4.23493e-05	6.97509e-05	0.00262971	0.00445546	0.607151	-0.719872
P4HA2	O15460	sp|O15460|P4HA2_HUMAN Prolyl 4-hydroxylase subunit alpha-2 OS=Homo sapiens OX=9606 GN=P4HA2 PE=1 SV=1	11	1.93053e-05	7.95241e-05	6.34524e-05	0.00054918	0.24276	-2.0424
RBX1	P62877	sp|P62877|RBX1_HUMAN E3 ubiquitin-protein ligase RBX1 OS=Homo sapiens OX=9606 GN=RBX1 PE=1 SV=1	1	2.20344e-08	0.000116891	0.00827824	0.00942416	0.000188503	-12.3731
LACTB	P83111	sp|P83111|LACTB_HUMAN Serine beta-lactamase-like protein LACTB, mitochondrial OS=Homo sapiens OX=9606 GN=LACTB PE=1 SV=2	8	3.35221e-05	6.18616e-05	0.00139661	0.00299265	0.541889	-0.883931
SF3A1	Q15459	sp|Q15459|SF3A1_HUMAN Splicing factor 3A subunit 1 OS=Homo sapiens OX=9606 GN=SF3A1 PE=1 SV=1	13	4.49301e-05	6.7963e-05	0.00748536	0.00877764	0.661097	-0.597066
BCKDHB	P21953	sp|P21953|ODBB_HUMAN 2-oxoisovalerate dehydrogenase subunit beta, mitochondrial OS=Homo sapiens OX=9606 GN=BCKDHB PE=1 SV=2	4	5.42079e-05	4.05874e-05	0.0128267	0.0126855	1.33559	0.417472
ABHD11	Q8NFV4	sp|Q8NFV4|ABHDB_HUMAN Protein ABHD11 OS=Homo sapiens OX=9606 GN=ABHD11 PE=1 SV=1	6	3.99127e-05	7.05469e-05	0.00910674	0.0100658	0.565761	-0.821735
RNH1	P13489	sp|P13489|RINI_HUMAN Ribonuclease inhibitor OS=Homo sapiens OX=9606 GN=RNH1 PE=1 SV=2	7	4.25656e-05	5.98797e-05	0.0106043	0.0111631	0.710852	-0.49238
AGR3	Q8TD06	sp|Q8TD06|AGR3_HUMAN Anterior gradient protein 3 OS=Homo sapiens OX=9606 GN=AGR3 PE=1 SV=1	3	4.50532e-05	6.47151e-05	0.000278271	0.00117973	0.696178	-0.522472
NDUFV3	P56181	sp|P56181|NDUV3_HUMAN NADH dehydrogenase [ubiquinone] flavoprotein 3, mitochondrial OS=Homo sapiens OX=9606 GN=NDUFV3 PE=1 SV=2	1	2.12833e-05	6.1374e-05	8.29718e-06	0.000227109	0.34678	-1.52791
DDB1	Q16531	sp|Q16531|DDB1_HUMAN DNA damage-binding protein 1 OS=Homo sapiens OX=9606 GN=DDB1 PE=1 SV=1	17	4.20652e-05	6.619e-05	0.00718326	0.0085374	0.635522	-0.653987
TIMM17B	O60830	sp|O60830|TI17B_HUMAN Mitochondrial import inner membrane translocase subunit Tim17-B OS=Homo sapiens OX=9606 GN=TIMM17B PE=1 SV=1	4	2.67285e-05	7.19652e-05	0.000399421	0.00142946	0.371409	-1.42892
CLPB	Q9H078	sp|Q9H078|CLPB_HUMAN Caseinolytic peptidase B protein homolog OS=Homo sapiens OX=9606 GN=CLPB PE=1 SV=1	9	4.48798e-05	5.82836e-05	0.00640515	0.00791034	0.770024	-0.377025
RAB5A	P20339	sp|P20339|RAB5A_HUMAN Ras-related protein Rab-5A OS=Homo sapiens OX=9606 GN=RAB5A PE=1 SV=2	2	3.69157e-05	6.46441e-05	0.00340554	0.00529509	0.571061	-0.808283
MFN2	O95140	sp|O95140|MFN2_HUMAN Mitofusin-2 OS=Homo sapiens OX=9606 GN=MFN2 PE=1 SV=3	13	4.18353e-05	5.3763e-05	0.00191673	0.00362187	0.778142	-0.361894
COQ8A	Q8NI60	sp|Q8NI60|COQ8A_HUMAN Atypical kinase COQ8A, mitochondrial OS=Homo sapiens OX=9606 GN=COQ8A PE=1 SV=1	7	3.45046e-05	5.52808e-05	0.00806488	0.00925393	0.624169	-0.67999
MRPS14	O60783	sp|O60783|RT14_HUMAN 28S ribosomal protein S14, mitochondrial OS=Homo sapiens OX=9606 GN=MRPS14 PE=1 SV=1	2	3.79748e-05	6.00563e-05	0.00132999	0.00290246	0.632319	-0.661275
RAB8A	P61006	sp|P61006|RAB8A_HUMAN Ras-related protein Rab-8A OS=Homo sapiens OX=9606 GN=RAB8A PE=1 SV=1	3	4.60406e-05	6.16967e-05	0.0158886	0.0147878	0.746242	-0.422284
LAMP2	P13473	sp|P13473|LAMP2_HUMAN Lysosome-associated membrane glycoprotein 2 OS=Homo sapiens OX=9606 GN=LAMP2 PE=1 SV=2	2	4.37752e-05	6.20095e-05	0.000160192	0.000881756	0.705944	-0.502374
PDAP1	Q13442	sp|Q13442|HAP28_HUMAN 28 kDa heat- and acid-stable phosphoprotein OS=Homo sapiens OX=9606 GN=PDAP1 PE=1 SV=1	3	7.24375e-05	5.13943e-05	0.0293287	0.0230298	1.40945	0.49513
MPV17	P39210	sp|P39210|MPV17_HUMAN Protein Mpv17 OS=Homo sapiens OX=9606 GN=MPV17 PE=1 SV=1	2	5.98772e-05	4.96543e-05	0.0487993	0.0334815	1.20588	0.270089
SF3B4	Q15427	sp|Q15427|SF3B4_HUMAN Splicing factor 3B subunit 4 OS=Homo sapiens OX=9606 GN=SF3B4 PE=1 SV=1	3	6.35309e-05	4.54008e-05	0.0159829	0.0148487	1.39933	0.484741
PRPF6	O94906	sp|O94906|PRP6_HUMAN Pre-mRNA-processing factor 6 OS=Homo sapiens OX=9606 GN=PRPF6 PE=1 SV=1	19	4.84712e-05	6.00986e-05	0.0135686	0.0132187	0.806528	-0.310203
ATP6V1B2	P21281	sp|P21281|VATB2_HUMAN V-type proton ATPase subunit B, brain isoform OS=Homo sapiens OX=9606 GN=ATP6V1B2 PE=1 SV=3	7	6.52224e-05	4.48137e-05	0.0126526	0.012558	1.45541	0.541427
PLXNB2	O15031	sp|O15031|PLXB2_HUMAN Plexin-B2 OS=Homo sapiens OX=9606 GN=PLXNB2 PE=1 SV=3	27	4.0107e-05	6.21223e-05	0.000580823	0.00175456	0.645613	-0.631258
PBXIP1	Q96AQ6	sp|Q96AQ6|PBIP1_HUMAN Pre-B-cell leukemia transcription factor-interacting protein 1 OS=Homo sapiens OX=9606 GN=PBXIP1 PE=1 SV=1	12	2.5278e-05	7.86963e-05	0.000283618	0.00119023	0.32121	-1.63841
PFKL	P17858	sp|P17858|PFKAL_HUMAN ATP-dependent 6-phosphofructokinase, liver type OS=Homo sapiens OX=9606 GN=PFKL PE=1 SV=6	9	5.77784e-05	4.64192e-05	0.0194464	0.0169394	1.24471	0.31581
GOLT1A	Q6ZVE7	sp|Q6ZVE7|GOT1A_HUMAN Vesicle transport protein GOT1A OS=Homo sapiens OX=9606 GN=GOLT1A PE=2 SV=1	1	6.33768e-05	4.13406e-05	0.0298713	0.0233457	1.53304	0.616396
NAGA	P17050	sp|P17050|NAGAB_HUMAN Alpha-N-acetylgalactosaminidase OS=Homo sapiens OX=9606 GN=NAGA PE=1 SV=2	5	4.26735e-05	6.20445e-05	4.63713e-05	0.000481155	0.687789	-0.539963
HNRNPUL1	Q9BUJ2	sp|Q9BUJ2|HNRL1_HUMAN Heterogeneous nuclear ribonucleoprotein U-like protein 1 OS=Homo sapiens OX=9606 GN=HNRNPUL1 PE=1 SV=2	8	6.54134e-05	3.99803e-05	0.0380072	0.0278792	1.63614	0.710298
RCN1	Q15293	sp|Q15293|RCN1_HUMAN Reticulocalbin-1 OS=Homo sapiens OX=9606 GN=RCN1 PE=1 SV=1	5	3.97894e-05	6.44802e-05	0.00103043	0.00247754	0.61708	-0.696472
ACSF3	Q4G176	sp|Q4G176|ACSF3_HUMAN Acyl-CoA synthetase family member 3, mitochondrial OS=Homo sapiens OX=9606 GN=ACSF3 PE=1 SV=3	9	2.93697e-05	6.6249e-05	0.000135837	0.000812933	0.443322	-1.17357
LDHD	Q86WU2	sp|Q86WU2|LDHD_HUMAN Probable D-lactate dehydrogenase, mitochondrial OS=Homo sapiens OX=9606 GN=LDHD PE=1 SV=1	8	4.05513e-05	5.92015e-05	0.0331035	0.0251673	0.684971	-0.545886
LY75	O60449	sp|O60449|LY75_HUMAN Lymphocyte antigen 75 OS=Homo sapiens OX=9606 GN=LY75 PE=1 SV=3	18	4.25939e-05	5.28016e-05	0.00417353	0.00604271	0.806678	-0.309935
VKORC1L1	Q8N0U8	sp|Q8N0U8|VKORL_HUMAN Vitamin K epoxide reductase complex subunit 1-like protein 1 OS=Homo sapiens OX=9606 GN=VKORC1L1 PE=1 SV=2	4	6.99903e-05	4.09853e-05	0.0284442	0.0225085	1.70769	0.772049
APLP2	Q06481	sp|Q06481|APLP2_HUMAN Amyloid-like protein 2 OS=Homo sapiens OX=9606 GN=APLP2 PE=1 SV=2	8	7.07034e-06	9.23421e-05	1.03067e-05	0.000245349	0.0765668	-3.70714
LAMC1	P11047	sp|P11047|LAMC1_HUMAN Laminin subunit gamma-1 OS=Homo sapiens OX=9606 GN=LAMC1 PE=1 SV=3	16	3.05516e-05	7.22013e-05	0.0106933	0.0112266	0.423144	-1.24078
SBDS	Q9Y3A5	sp|Q9Y3A5|SBDS_HUMAN Ribosome maturation protein SBDS OS=Homo sapiens OX=9606 GN=SBDS PE=1 SV=4	6	5.75325e-05	4.23165e-05	0.000145079	0.000840417	1.35958	0.443159
CLDN3	O15551	sp|O15551|CLD3_HUMAN Claudin-3 OS=Homo sapiens OX=9606 GN=CLDN3 PE=1 SV=1;sp|O95484|CLD9_HUMAN Claudin-9 OS=Homo sapiens OX=9606 GN=CLDN9 PE=1 SV=1	1	3.19387e-05	6.18437e-05	0.000847974	0.0021781	0.516443	-0.95332
CISD3	P0C7P0	sp|P0C7P0|CISD3_HUMAN CDGSH iron-sulfur domain-containing protein 3, mitochondrial OS=Homo sapiens OX=9606 GN=CISD3 PE=1 SV=1	2	1.82605e-05	4.51517e-05	4.28869e-05	0.00046547	0.404425	-1.30606
CAAP1	Q9H8G2	sp|Q9H8G2|CAAP1_HUMAN Caspase activity and apoptosis inhibitor 1 OS=Homo sapiens OX=9606 GN=CAAP1 PE=1 SV=2	2	2.20344e-08	6.97977e-05	0.0431257	0.0305287	0.00031569	-11.6292
JAGN1	Q8N5M9	sp|Q8N5M9|JAGN1_HUMAN Protein jagunal homolog 1 OS=Homo sapiens OX=9606 GN=JAGN1 PE=1 SV=1	1	5.2944e-05	3.53064e-05	0.0024569	0.00426965	1.49956	0.584539
EML4	Q9HC35	sp|Q9HC35|EMAL4_HUMAN Echinoderm microtubule-associated protein-like 4 OS=Homo sapiens OX=9606 GN=EML4 PE=1 SV=3	14	6.23298e-05	3.67905e-05	0.0121981	0.0122518	1.69418	0.760589
PSME1	Q06323	sp|Q06323|PSME1_HUMAN Proteasome activator complex subunit 1 OS=Homo sapiens OX=9606 GN=PSME1 PE=1 SV=1	4	5.78003e-05	3.90526e-05	0.0380779	0.027917	1.48006	0.56566
GAR1	Q9NY12	sp|Q9NY12|GAR1_HUMAN H/ACA ribonucleoprotein complex subunit 1 OS=Homo sapiens OX=9606 GN=GAR1 PE=1 SV=1	4	3.1396e-05	5.0032e-05	0.0399496	0.0289054	0.627518	-0.672272
PLOD2	O00469	sp|O00469|PLOD2_HUMAN Procollagen-lysine,2-oxoglutarate 5-dioxygenase 2 OS=Homo sapiens OX=9606 GN=PLOD2 PE=1 SV=2	8	2.26943e-05	6.96779e-05	1.34603e-06	0.000107287	0.325703	-1.61837
PEPD	P12955	sp|P12955|PEPD_HUMAN Xaa-Pro dipeptidase OS=Homo sapiens OX=9606 GN=PEPD PE=1 SV=3	5	3.73851e-05	5.76333e-05	0.00154599	0.00318515	0.648673	-0.624437
CHTOP	Q9Y3Y2	sp|Q9Y3Y2|CHTOP_HUMAN Chromatin target of PRMT1 protein OS=Homo sapiens OX=9606 GN=CHTOP PE=1 SV=2	2	9.25962e-05	2.40416e-05	4.61007e-06	0.000183726	3.8515	1.94542
AP1G1	O43747	sp|O43747|AP1G1_HUMAN AP-1 complex subunit gamma-1 OS=Homo sapiens OX=9606 GN=AP1G1 PE=1 SV=5	9	4.24525e-05	5.35587e-05	0.0103723	0.0109958	0.792634	-0.335273
PEX3	P56589	sp|P56589|PEX3_HUMAN Peroxisomal biogenesis factor 3 OS=Homo sapiens OX=9606 GN=PEX3 PE=1 SV=1	3	3.64497e-05	5.26148e-05	0.0127892	0.0126581	0.692766	-0.52956
CD151	P48509	sp|P48509|CD151_HUMAN CD151 antigen OS=Homo sapiens OX=9606 GN=CD151 PE=1 SV=3	3	8.554e-06	0.000118888	0.00506578	0.00679167	0.0719499	-3.79686
ATP12A	P54707	sp|P54707|AT12A_HUMAN Potassium-transporting ATPase alpha chain 2 OS=Homo sapiens OX=9606 GN=ATP12A PE=1 SV=3	1	2.90496e-05	6.05837e-05	0.000553347	0.00170919	0.479496	-1.06041
MRPL50	Q8N5N7	sp|Q8N5N7|RM50_HUMAN 39S ribosomal protein L50, mitochondrial OS=Homo sapiens OX=9606 GN=MRPL50 PE=1 SV=2	3	3.54941e-05	6.0024e-05	0.0246393	0.0202395	0.591331	-0.757961
DPY30	Q9C005	sp|Q9C005|DPY30_HUMAN Protein dpy-30 homolog OS=Homo sapiens OX=9606 GN=DPY30 PE=1 SV=1	2	0.000100804	5.6324e-06	0.000278904	0.00118098	17.8973	4.16167
NLN	Q9BYT8	sp|Q9BYT8|NEUL_HUMAN Neurolysin, mitochondrial OS=Homo sapiens OX=9606 GN=NLN PE=1 SV=1	5	2.01002e-05	3.19507e-05	0.0305004	0.0237082	0.6291	-0.668639
ACOX2	Q99424	sp|Q99424|ACOX2_HUMAN Peroxisomal acyl-coenzyme A oxidase 2 OS=Homo sapiens OX=9606 GN=ACOX2 PE=1 SV=1	11	3.85504e-05	4.83841e-05	0.00248308	0.00429841	0.796757	-0.327788
DNAJB1	P25685	sp|P25685|DNJB1_HUMAN DnaJ homolog subfamily B member 1 OS=Homo sapiens OX=9606 GN=DNAJB1 PE=1 SV=4	5	5.04166e-05	4.1294e-05	0.0164285	0.0151331	1.22092	0.287967
MEP1A	Q16819	sp|Q16819|MEP1A_HUMAN Meprin A subunit alpha OS=Homo sapiens OX=9606 GN=MEP1A PE=1 SV=2	9	2.59315e-06	8.77402e-05	1.23333e-08	9.73398e-06	0.0295549	-5.08046
RRS1	Q15050	sp|Q15050|RRS1_HUMAN Ribosome biogenesis regulatory protein homolog OS=Homo sapiens OX=9606 GN=RRS1 PE=1 SV=2	5	6.20679e-05	2.26028e-05	0.00661666	0.00808559	2.74603	1.45735
PSMB1	P20618	sp|P20618|PSB1_HUMAN Proteasome subunit beta type-1 OS=Homo sapiens OX=9606 GN=PSMB1 PE=1 SV=2	6	6.14039e-05	2.6239e-05	0.0337731	0.0255409	2.34018	1.22662
SDF4	Q9BRK5	sp|Q9BRK5|CAB45_HUMAN 45 kDa calcium-binding protein OS=Homo sapiens OX=9606 GN=SDF4 PE=1 SV=1	4	3.02602e-05	5.43382e-05	0.000169667	0.000908048	0.556886	-0.844546
YIPF6	Q96EC8	sp|Q96EC8|YIPF6_HUMAN Protein YIPF6 OS=Homo sapiens OX=9606 GN=YIPF6 PE=1 SV=2	2	5.5365e-05	4.52036e-07	7.09212e-06	0.00021626	122.479	6.93639
YBX3	P16989	sp|P16989|YBOX3_HUMAN Y-box-binding protein 3 OS=Homo sapiens OX=9606 GN=YBX3 PE=1 SV=4	3	6.0656e-05	2.83487e-05	0.00163363	0.00329133	2.13964	1.09737
USP5	P45974	sp|P45974|UBP5_HUMAN Ubiquitin carboxyl-terminal hydrolase 5 OS=Homo sapiens OX=9606 GN=USP5 PE=1 SV=2	8	4.98086e-05	3.84094e-05	0.0212104	0.0180838	1.29678	0.374935
OXSM	Q9NWU1	sp|Q9NWU1|OXSM_HUMAN 3-oxoacyl-[acyl-carrier-protein] synthase, mitochondrial OS=Homo sapiens OX=9606 GN=OXSM PE=1 SV=1	5	3.6282e-05	5.249e-05	0.0417461	0.0298301	0.691217	-0.53279
SURF6	O75683	sp|O75683|SURF6_HUMAN Surfeit locus protein 6 OS=Homo sapiens OX=9606 GN=SURF6 PE=1 SV=3	4	4.9965e-05	3.6347e-05	0.0193651	0.0168934	1.37467	0.459081
RAB9A	P51151	sp|P51151|RAB9A_HUMAN Ras-related protein Rab-9A OS=Homo sapiens OX=9606 GN=RAB9A PE=1 SV=1	4	4.68824e-05	3.68342e-05	0.0362589	0.0269309	1.2728	0.348004
EPS8L2	Q9H6S3	sp|Q9H6S3|ES8L2_HUMAN Epidermal growth factor receptor kinase substrate 8-like protein 2 OS=Homo sapiens OX=9606 GN=EPS8L2 PE=1 SV=2	10	4.97513e-05	3.36917e-05	0.0226312	0.0189966	1.47666	0.562341
STIM1	Q13586	sp|Q13586|STIM1_HUMAN Stromal interaction molecule 1 OS=Homo sapiens OX=9606 GN=STIM1 PE=1 SV=3	6	3.70317e-05	4.65115e-05	0.00858759	0.0096663	0.796183	-0.328828
PROM1	O43490	sp|O43490|PROM1_HUMAN Prominin-1 OS=Homo sapiens OX=9606 GN=PROM1 PE=1 SV=1	9	4.49356e-05	3.21043e-05	0.000502679	0.00162444	1.39968	0.485094
GLO1	Q04760	sp|Q04760|LGUL_HUMAN Lactoylglutathione lyase OS=Homo sapiens OX=9606 GN=GLO1 PE=1 SV=4	5	6.83596e-05	2.80711e-05	0.000372403	0.00137766	2.43523	1.28406
MCM3	P25205	sp|P25205|MCM3_HUMAN DNA replication licensing factor MCM3 OS=Homo sapiens OX=9606 GN=MCM3 PE=1 SV=3	11	5.0386e-05	4.15392e-05	0.0073729	0.00868314	1.21297	0.278549
COPE	O14579	sp|O14579|COPE_HUMAN Coatomer subunit epsilon OS=Homo sapiens OX=9606 GN=COPE PE=1 SV=3	5	5.08652e-05	3.7034e-05	0.00263039	0.00445617	1.37347	0.457829
RPL14	P50914	sp|P50914|RL14_HUMAN 60S ribosomal protein L14 OS=Homo sapiens OX=9606 GN=RPL14 PE=1 SV=4	3	9.86305e-05	1.25853e-05	1.93417e-05	0.000322971	7.83697	2.9703
AARS	P49588	sp|P49588|SYAC_HUMAN Alanine--tRNA ligase, cytoplasmic OS=Homo sapiens OX=9606 GN=AARS PE=1 SV=2	12	5.34332e-05	3.64801e-05	0.00347746	0.00536976	1.46472	0.550627
SORL1	Q92673	sp|Q92673|SORL_HUMAN Sortilin-related receptor OS=Homo sapiens OX=9606 GN=SORL1 PE=1 SV=2	34	1.95012e-05	6.61184e-05	0.00228733	0.00407779	0.294944	-1.76149
MOB4	Q9Y3A3	sp|Q9Y3A3|PHOCN_HUMAN MOB-like protein phocein OS=Homo sapiens OX=9606 GN=MOB4 PE=1 SV=1	3	5.82777e-05	3.6297e-05	0.0143276	0.013748	1.60558	0.683095
NFU1	Q9UMS0	sp|Q9UMS0|NFU1_HUMAN NFU1 iron-sulfur cluster scaffold homolog, mitochondrial OS=Homo sapiens OX=9606 GN=NFU1 PE=1 SV=2	3	2.78783e-05	5.61434e-05	0.000561722	0.00172323	0.496555	-1.00998
QPCTL	Q9NXS2	sp|Q9NXS2|QPCTL_HUMAN Glutaminyl-peptide cyclotransferase-like protein OS=Homo sapiens OX=9606 GN=QPCTL PE=1 SV=2	3	3.42543e-05	4.47341e-05	0.00195619	0.003673	0.765731	-0.38509
MRPL22	Q9NWU5	sp|Q9NWU5|RM22_HUMAN 39S ribosomal protein L22, mitochondrial OS=Homo sapiens OX=9606 GN=MRPL22 PE=1 SV=1	3	3.38181e-05	5.20639e-05	0.0124822	0.0124355	0.64955	-0.622487
CKMT1A	P12532	sp|P12532|KCRU_HUMAN Creatine kinase U-type, mitochondrial OS=Homo sapiens OX=9606 GN=CKMT1A PE=1 SV=1	4	2.80452e-05	4.12278e-05	0.0179764	0.0160848	0.680249	-0.555866
AKR7A2	O43488	sp|O43488|ARK72_HUMAN Aflatoxin B1 aldehyde reductase member 2 OS=Homo sapiens OX=9606 GN=AKR7A2 PE=1 SV=3	5	3.08113e-05	4.7356e-05	0.00456868	0.00638868	0.65063	-0.620091
MELTF	P08582	sp|P08582|TRFM_HUMAN Melanotransferrin OS=Homo sapiens OX=9606 GN=MELTF PE=1 SV=2	14	3.29936e-05	4.63453e-05	0.018714	0.0165194	0.711908	-0.490237
PITRM1	Q5JRX3	sp|Q5JRX3|PREP_HUMAN Presequence protease, mitochondrial OS=Homo sapiens OX=9606 GN=PITRM1 PE=1 SV=3	15	3.48511e-05	4.80776e-05	0.0184803	0.016383	0.724892	-0.464161
LAMB3	Q13751	sp|Q13751|LAMB3_HUMAN Laminin subunit beta-3 OS=Homo sapiens OX=9606 GN=LAMB3 PE=1 SV=1	21	2.38377e-05	5.9161e-05	0.00241601	0.00422427	0.40293	-1.3114
SPRYD7	Q5W111	sp|Q5W111|SPRY7_HUMAN SPRY domain-containing protein 7 OS=Homo sapiens OX=9606 GN=SPRYD7 PE=1 SV=2	4	2.69922e-05	5.44039e-05	0.0159699	0.0148403	0.496143	-1.01117
SAR1B	Q9Y6B6	sp|Q9Y6B6|SAR1B_HUMAN GTP-binding protein SAR1b OS=Homo sapiens OX=9606 GN=SAR1B PE=1 SV=1	2	2.07551e-05	3.37111e-05	0.00113977	0.00264185	0.615676	-0.699757
ERAP1	Q9NZ08	sp|Q9NZ08|ERAP1_HUMAN Endoplasmic reticulum aminopeptidase 1 OS=Homo sapiens OX=9606 GN=ERAP1 PE=1 SV=3	11	3.23301e-05	4.95652e-05	0.000534189	0.00167744	0.652274	-0.616451
SYPL1	Q16563	sp|Q16563|SYPL1_HUMAN Synaptophysin-like protein 1 OS=Homo sapiens OX=9606 GN=SYPL1 PE=1 SV=1	2	4.87385e-05	3.48531e-05	0.000338403	0.0013073	1.3984	0.483773
CLPP	Q16740	sp|Q16740|CLPP_HUMAN ATP-dependent Clp protease proteolytic subunit, mitochondrial OS=Homo sapiens OX=9606 GN=CLPP PE=1 SV=1	5	2.77455e-05	4.85165e-05	0.00210379	0.00385863	0.571877	-0.806224
CAPN5	O15484	sp|O15484|CAN5_HUMAN Calpain-5 OS=Homo sapiens OX=9606 GN=CAPN5 PE=1 SV=2	8	3.90642e-05	5.21394e-05	0.017108	0.0155577	0.749225	-0.41653
KTN1	Q86UP2	sp|Q86UP2|KTN1_HUMAN Kinectin OS=Homo sapiens OX=9606 GN=KTN1 PE=1 SV=1	21	4.88566e-05	3.49662e-05	0.000149149	0.00085197	1.39725	0.482594
RLN1	P04808	sp|P04808|REL1_HUMAN Prorelaxin H1 OS=Homo sapiens OX=9606 GN=RLN1 PE=2 SV=1;sp|P04090|REL2_HUMAN Prorelaxin H2 OS=Homo sapiens OX=9606 GN=RLN2 PE=1 SV=1	1	2.17611e-05	3.66367e-05	0.000405071	0.00143986	0.59397	-0.751539
DMAC2	Q9NW81	sp|Q9NW81|DMAC2_HUMAN Distal membrane-arm assembly complex protein 2 OS=Homo sapiens OX=9606 GN=DMAC2 PE=1 SV=3	1	2.20344e-08	1.24472e-05	0.00591824	0.00749387	0.00177024	-9.14184
CDX2	Q99626	sp|Q99626|CDX2_HUMAN Homeobox protein CDX-2 OS=Homo sapiens OX=9606 GN=CDX2 PE=1 SV=3;sp|P47902|CDX1_HUMAN Homeobox protein CDX-1 OS=Homo sapiens OX=9606 GN=CDX1 PE=1 SV=2;sp|O14627|CDX4_HUMAN Homeobox protein CDX-4 OS=Homo sapiens OX=9606 GN=CDX4 PE=1 SV=	2	2.21871e-05	4.81216e-05	0.00628704	0.00781084	0.461063	-1.11697
NGDN	Q8NEJ9	sp|Q8NEJ9|NGDN_HUMAN Neuroguidin OS=Homo sapiens OX=9606 GN=NGDN PE=1 SV=1	3	4.96617e-05	3.09028e-05	0.00443521	0.00627449	1.60703	0.684396
STBD1	O95210	sp|O95210|STBD1_HUMAN Starch-binding domain-containing protein 1 OS=Homo sapiens OX=9606 GN=STBD1 PE=1 SV=1	6	4.47065e-05	3.10299e-05	3.27294e-05	0.000414112	1.44075	0.526823
BCS1L	Q9Y276	sp|Q9Y276|BCS1_HUMAN Mitochondrial chaperone BCS1 OS=Homo sapiens OX=9606 GN=BCS1L PE=1 SV=1	8	4.37631e-05	2.61819e-05	0.0428247	0.0303743	1.67151	0.741148
SNRPA1	P09661	sp|P09661|RU2A_HUMAN U2 small nuclear ribonucleoprotein A OS=Homo sapiens OX=9606 GN=SNRPA1 PE=1 SV=2	5	4.30765e-05	3.10534e-05	0.00450317	0.00633296	1.38717	0.472147
BOP1	Q14137	sp|Q14137|BOP1_HUMAN Ribosome biogenesis protein BOP1 OS=Homo sapiens OX=9606 GN=BOP1 PE=1 SV=2	8	4.91398e-05	3.3642e-05	0.0170898	0.0155465	1.46067	0.54663
MRPL24	Q96A35	sp|Q96A35|RM24_HUMAN 39S ribosomal protein L24, mitochondrial OS=Homo sapiens OX=9606 GN=MRPL24 PE=1 SV=1	2	3.13168e-05	4.53634e-05	0.000235079	0.00108635	0.690356	-0.534588
MAIP1	Q8WWC4	sp|Q8WWC4|MAIP1_HUMAN m-AAA protease-interacting protein 1, mitochondrial OS=Homo sapiens OX=9606 GN=MAIP1 PE=1 SV=1	5	3.39391e-05	4.31495e-05	0.0145163	0.0138771	0.786547	-0.346395
NPTN	Q9Y639	sp|Q9Y639|NPTN_HUMAN Neuroplastin OS=Homo sapiens OX=9606 GN=NPTN PE=1 SV=2	6	2.14059e-05	5.40564e-05	4.22001e-06	0.000177693	0.395992	-1.33646
NUCKS1	Q9H1E3	sp|Q9H1E3|NUCKS_HUMAN Nuclear ubiquitous casein and cyclin-dependent kinase substrate 1 OS=Homo sapiens OX=9606 GN=NUCKS1 PE=1 SV=1	4	7.34753e-05	1.8933e-05	0.00140976	0.00301021	3.88081	1.95636
TRMT10C	Q7L0Y3	sp|Q7L0Y3|TM10C_HUMAN tRNA methyltransferase 10 homolog C OS=Homo sapiens OX=9606 GN=TRMT10C PE=1 SV=2	6	2.74229e-05	4.12161e-05	6.15684e-07	7.33699e-05	0.665345	-0.587825
COX20	Q5RI15	sp|Q5RI15|COX20_HUMAN Cytochrome c oxidase assembly protein COX20, mitochondrial OS=Homo sapiens OX=9606 GN=COX20 PE=1 SV=2	1	5.38419e-05	2.2151e-05	5.33545e-05	0.000511728	2.43068	1.28136
DBN1	Q16643	sp|Q16643|DREB_HUMAN Drebrin OS=Homo sapiens OX=9606 GN=DBN1 PE=1 SV=4	5	4.61539e-05	3.30591e-05	2.64527e-05	0.000375504	1.3961	0.481405
PDXK	O00764	sp|O00764|PDXK_HUMAN Pyridoxal kinase OS=Homo sapiens OX=9606 GN=PDXK PE=1 SV=1	3	6.52559e-05	1.54461e-05	0.0239938	0.0198458	4.22475	2.07887
ARHGAP1	Q07960	sp|Q07960|RHG01_HUMAN Rho GTPase-activating protein 1 OS=Homo sapiens OX=9606 GN=ARHGAP1 PE=1 SV=1	8	4.86891e-05	3.73964e-05	0.0206563	0.0177202	1.30197	0.380697
LCP1	P13796	sp|P13796|PLSL_HUMAN Plastin-2 OS=Homo sapiens OX=9606 GN=LCP1 PE=1 SV=6	9	4.91715e-05	3.47471e-05	0.000597471	0.00178108	1.41512	0.500929
PAFAH1B1	P43034	sp|P43034|LIS1_HUMAN Platelet-activating factor acetylhydrolase IB subunit alpha OS=Homo sapiens OX=9606 GN=PAFAH1B1 PE=1 SV=2	5	4.48521e-05	2.72414e-05	0.000219306	0.00104792	1.64647	0.719376
PC	P11498	sp|P11498|PYC_HUMAN Pyruvate carboxylase, mitochondrial OS=Homo sapiens OX=9606 GN=PC PE=1 SV=2	16	2.75505e-05	4.3535e-05	0.00148387	0.00310692	0.632836	-0.660095
CGN	Q9P2M7	sp|Q9P2M7|CING_HUMAN Cingulin OS=Homo sapiens OX=9606 GN=CGN PE=1 SV=2	20	3.10339e-05	4.24027e-05	0.00224253	0.00402544	0.731887	-0.450308
TSPAN6	O43657	sp|O43657|TSN6_HUMAN Tetraspanin-6 OS=Homo sapiens OX=9606 GN=TSPAN6 PE=1 SV=1	3	2.03972e-05	4.51949e-05	0.000686917	0.00191244	0.451316	-1.14779
BST2	Q10589	sp|Q10589|BST2_HUMAN Bone marrow stromal antigen 2 OS=Homo sapiens OX=9606 GN=BST2 PE=1 SV=1	2	2.44083e-05	4.81657e-05	0.000946564	0.00234297	0.506756	-0.980636
ABHD14B	Q96IU4	sp|Q96IU4|ABHEB_HUMAN Protein ABHD14B OS=Homo sapiens OX=9606 GN=ABHD14B PE=1 SV=1	3	3.78076e-05	5.06691e-05	0.00985314	0.0106168	0.746167	-0.42243
TMEM141	Q96I45	sp|Q96I45|TM141_HUMAN Transmembrane protein 141 OS=Homo sapiens OX=9606 GN=TMEM141 PE=1 SV=1	1	2.8476e-05	7.99438e-05	0.0264895	0.0213386	0.356201	-1.48924
CPOX	P36551	sp|P36551|HEM6_HUMAN Oxygen-dependent coproporphyrinogen-III oxidase, mitochondrial OS=Homo sapiens OX=9606 GN=CPOX PE=1 SV=3	5	2.28117e-05	3.6171e-05	0.0397487	0.0288006	0.630662	-0.66506
SNX27	Q96L92	sp|Q96L92|SNX27_HUMAN Sorting nexin-27 OS=Homo sapiens OX=9606 GN=SNX27 PE=1 SV=2	8	2.84759e-05	3.9116e-05	0.000459616	0.00154681	0.727987	-0.458016
SERF2	P84101	sp|P84101|SERF2_HUMAN Small EDRK-rich factor 2 OS=Homo sapiens OX=9606 GN=SERF2 PE=1 SV=1	1	1.32679e-05	8.30791e-05	0.00653182	0.00801574	0.159702	-2.64655
NMT1	P30419	sp|P30419|NMT1_HUMAN Glycylpeptide N-tetradecanoyltransferase 1 OS=Homo sapiens OX=9606 GN=NMT1 PE=1 SV=2	6	5.0924e-05	2.75167e-05	7.3305e-05	0.000579289	1.85066	0.888038
GUSB	P08236	sp|P08236|BGLR_HUMAN Beta-glucuronidase OS=Homo sapiens OX=9606 GN=GUSB PE=1 SV=2	6	2.81751e-05	4.68793e-05	0.0190575	0.0167178	0.601013	-0.734531
CIB1	Q99828	sp|Q99828|CIB1_HUMAN Calcium and integrin-binding protein 1 OS=Homo sapiens OX=9606 GN=CIB1 PE=1 SV=4	3	2.92242e-05	3.96337e-05	0.00144371	0.00305499	0.737358	-0.439563
ITM2B	Q9Y287	sp|Q9Y287|ITM2B_HUMAN Integral membrane protein 2B OS=Homo sapiens OX=9606 GN=ITM2B PE=1 SV=1	3	5.72644e-06	6.31975e-05	9.98088e-05	0.000685836	0.0906118	-3.46416
CMPK1	P30085	sp|P30085|KCY_HUMAN UMP-CMP kinase OS=Homo sapiens OX=9606 GN=CMPK1 PE=1 SV=3	3	4.95168e-05	2.81714e-05	0.000394377	0.00142004	1.7577	0.813687
GMFB	P60983	sp|P60983|GMFB_HUMAN Glia maturation factor beta OS=Homo sapiens OX=9606 GN=GMFB PE=1 SV=2	2	4.21648e-05	3.33746e-05	0.00737699	0.00868625	1.26338	0.337288
MAPK1	P28482	sp|P28482|MK01_HUMAN Mitogen-activated protein kinase 1 OS=Homo sapiens OX=9606 GN=MAPK1 PE=1 SV=3	5	4.78411e-05	3.06153e-05	0.00207686	0.00382541	1.56265	0.643995
F13A1	P00488	sp|P00488|F13A_HUMAN Coagulation factor XIII A chain OS=Homo sapiens OX=9606 GN=F13A1 PE=1 SV=4	4	5.54882e-06	2.26801e-05	4.07903e-06	0.00017534	0.244656	-2.03117
PEX14	O75381	sp|O75381|PEX14_HUMAN Peroxisomal membrane protein PEX14 OS=Homo sapiens OX=9606 GN=PEX14 PE=1 SV=1	4	4.61513e-05	2.71596e-05	0.000396279	0.00142361	1.69926	0.76491
MRPS2	Q9Y399	sp|Q9Y399|RT02_HUMAN 28S ribosomal protein S2, mitochondrial OS=Homo sapiens OX=9606 GN=MRPS2 PE=1 SV=1	5	1.89306e-05	4.83876e-05	0.00109712	0.0025792	0.391228	-1.35392
ERGIC2	Q96RQ1	sp|Q96RQ1|ERGI2_HUMAN Endoplasmic reticulum-Golgi intermediate compartment protein 2 OS=Homo sapiens OX=9606 GN=ERGIC2 PE=1 SV=2	5	5.08409e-05	1.61102e-05	0.0266058	0.0214062	3.15581	1.65801
RCN2	Q14257	sp|Q14257|RCN2_HUMAN Reticulocalbin-2 OS=Homo sapiens OX=9606 GN=RCN2 PE=1 SV=1	4	2.65868e-05	3.81381e-05	0.00020359	0.00100693	0.697119	-0.520522
HEXA	P06865	sp|P06865|HEXA_HUMAN Beta-hexosaminidase subunit alpha OS=Homo sapiens OX=9606 GN=HEXA PE=1 SV=2	7	2.77762e-05	4.26529e-05	0.000179344	0.000937745	0.651214	-0.618797
ARFGAP1	Q8N6T3	sp|Q8N6T3|ARFG1_HUMAN ADP-ribosylation factor GTPase-activating protein 1 OS=Homo sapiens OX=9606 GN=ARFGAP1 PE=1 SV=2	4	3.75023e-05	2.82089e-05	0.000297532	0.00121683	1.32945	0.410828
TCEA1	P23193	sp|P23193|TCEA1_HUMAN Transcription elongation factor A protein 1 OS=Homo sapiens OX=9606 GN=TCEA1 PE=1 SV=2	4	3.73149e-05	3.04595e-05	0.0415696	0.0297403	1.22506	0.292857
IGF2R	P11717	sp|P11717|MPRI_HUMAN Cation-independent mannose-6-phosphate receptor OS=Homo sapiens OX=9606 GN=IGF2R PE=1 SV=3	26	2.29624e-05	4.41003e-05	1.76015e-05	0.000307737	0.520687	-0.941511
SDC4	P31431	sp|P31431|SDC4_HUMAN Syndecan-4 OS=Homo sapiens OX=9606 GN=SDC4 PE=1 SV=2	3	9.88825e-06	7.45523e-05	2.02362e-06	0.000125905	0.132635	-2.91447
PTBP3	O95758	sp|O95758|PTBP3_HUMAN Polypyrimidine tract-binding protein 3 OS=Homo sapiens OX=9606 GN=PTBP3 PE=1 SV=2	5	1.78402e-05	4.16901e-05	0.00574236	0.00734078	0.427924	-1.22457
SMDT1	Q9H4I9	sp|Q9H4I9|EMRE_HUMAN Essential MCU regulator, mitochondrial OS=Homo sapiens OX=9606 GN=SMDT1 PE=1 SV=1	1	6.00668e-05	1.85914e-05	0.000155197	0.000868554	3.2309	1.69194
EMC7	Q9NPA0	sp|Q9NPA0|EMC7_HUMAN ER membrane protein complex subunit 7 OS=Homo sapiens OX=9606 GN=EMC7 PE=1 SV=1	3	5.06306e-05	1.7664e-05	1.41566e-05	0.000276615	2.86632	1.5192
NME2	P22392	sp|P22392|NDKB_HUMAN Nucleoside diphosphate kinase B OS=Homo sapiens OX=9606 GN=NME2 PE=1 SV=1;sp|O60361|NDK8_HUMAN Putative nucleoside diphosphate kinase OS=Homo sapiens OX=9606 GN=NME2P1 PE=5 SV=1	2	4.95543e-05	2.58591e-05	0.00165212	0.00331312	1.91632	0.938337
CAND1	Q86VP6	sp|Q86VP6|CAND1_HUMAN Cullin-associated NEDD8-dissociated protein 1 OS=Homo sapiens OX=9606 GN=CAND1 PE=1 SV=2	16	3.67626e-05	2.8469e-05	0.0327211	0.024957	1.29132	0.368851
SPTLC1	O15269	sp|O15269|SPTC1_HUMAN Serine palmitoyltransferase 1 OS=Homo sapiens OX=9606 GN=SPTLC1 PE=1 SV=1	8	1.61321e-05	4.79085e-05	0.0399851	0.0289239	0.336728	-1.57035
ICAM1	P05362	sp|P05362|ICAM1_HUMAN Intercellular adhesion molecule 1 OS=Homo sapiens OX=9606 GN=ICAM1 PE=1 SV=2	7	2.23066e-05	3.95452e-05	0.000781654	0.00206281	0.564077	-0.826035
SNX9	Q9Y5X1	sp|Q9Y5X1|SNX9_HUMAN Sorting nexin-9 OS=Homo sapiens OX=9606 GN=SNX9 PE=1 SV=1	6	3.9985e-05	1.43118e-05	0.000282338	0.00118773	2.79385	1.48226
ISCU	Q9H1K1	sp|Q9H1K1|ISCU_HUMAN Iron-sulfur cluster assembly enzyme ISCU, mitochondrial OS=Homo sapiens OX=9606 GN=ISCU PE=1 SV=2	3	1.5625e-05	4.49874e-05	0.0175273	0.0158144	0.34732	-1.52566
SDR39U1	Q9NRG7	sp|Q9NRG7|D39U1_HUMAN Epimerase family protein SDR39U1 OS=Homo sapiens OX=9606 GN=SDR39U1 PE=1 SV=2	2	4.28992e-05	2.2991e-05	0.0124824	0.0124356	1.86591	0.89988
STX17	P56962	sp|P56962|STX17_HUMAN Syntaxin-17 OS=Homo sapiens OX=9606 GN=STX17 PE=1 SV=2	3	3.95963e-05	2.6886e-05	0.0048529	0.00662323	1.47275	0.558511
MRPL9	Q9BYD2	sp|Q9BYD2|RM09_HUMAN 39S ribosomal protein L9, mitochondrial OS=Homo sapiens OX=9606 GN=MRPL9 PE=1 SV=2	3	2.59227e-05	3.75506e-05	0.000608543	0.00179834	0.69034	-0.53462
NENF	Q9UMX5	sp|Q9UMX5|NENF_HUMAN Neudesin OS=Homo sapiens OX=9606 GN=NENF PE=1 SV=1	5	2.28056e-05	3.24905e-05	0.00349405	0.00538684	0.701918	-0.510626
TRA2A	Q13595	sp|Q13595|TRA2A_HUMAN Transformer-2 protein homolog alpha OS=Homo sapiens OX=9606 GN=TRA2A PE=1 SV=1	3	4.46041e-05	2.35443e-05	0.0353381	0.0264219	1.89448	0.921801
SYNE3	Q6ZMZ3	sp|Q6ZMZ3|SYNE3_HUMAN Nesprin-3 OS=Homo sapiens OX=9606 GN=SYNE3 PE=1 SV=2	2	8.22929e-06	4.30584e-05	0.00876318	0.00980249	0.191119	-2.38745
PMPCA	Q10713	sp|Q10713|MPPA_HUMAN Mitochondrial-processing peptidase subunit alpha OS=Homo sapiens OX=9606 GN=PMPCA PE=1 SV=2	6	2.12287e-05	3.89987e-05	0.00754148	0.00882468	0.544344	-0.877408
PGM1	P36871	sp|P36871|PGM1_HUMAN Phosphoglucomutase-1 OS=Homo sapiens OX=9606 GN=PGM1 PE=1 SV=3	11	3.52935e-05	2.77764e-05	0.0170989	0.0155521	1.27063	0.345542
GOSR1	O95249	sp|O95249|GOSR1_HUMAN Golgi SNAP receptor complex member 1 OS=Homo sapiens OX=9606 GN=GOSR1 PE=1 SV=1	3	3.47973e-05	2.83483e-05	0.00475963	0.00654751	1.22749	0.29571
CERS2	Q96G23	sp|Q96G23|CERS2_HUMAN Ceramide synthase 2 OS=Homo sapiens OX=9606 GN=CERS2 PE=1 SV=1	2	3.84425e-05	2.36219e-05	0.000105585	0.00070869	1.62741	0.702578
PSMC6	P62333	sp|P62333|PRS10_HUMAN 26S proteasome regulatory subunit 10B OS=Homo sapiens OX=9606 GN=PSMC6 PE=1 SV=1	5	3.63858e-05	2.85467e-05	0.030691	0.0238172	1.27461	0.350052
EGFR	P00533	sp|P00533|EGFR_HUMAN Epidermal growth factor receptor OS=Homo sapiens OX=9606 GN=EGFR PE=1 SV=2	9	1.84608e-05	3.44239e-05	0.028627	0.0226169	0.53628	-0.898943
BCL2L13	Q9BXK5	sp|Q9BXK5|B2L13_HUMAN Bcl-2-like protein 13 OS=Homo sapiens OX=9606 GN=BCL2L13 PE=1 SV=1	2	2.64964e-05	4.35672e-05	0.0216474	0.0183676	0.608172	-0.717449
GPC3	P51654	sp|P51654|GPC3_HUMAN Glypican-3 OS=Homo sapiens OX=9606 GN=GPC3 PE=1 SV=1	3	8.39572e-07	3.90261e-05	2.86329e-06	0.000150091	0.0215131	-5.53864
MT-ND4	P03905	sp|P03905|NU4M_HUMAN NADH-ubiquinone oxidoreductase chain 4 OS=Homo sapiens OX=9606 GN=MT-ND4 PE=1 SV=1	3	4.48059e-05	4.28973e-06	0.00071579	0.00195679	10.4449	3.38473
LETMD1	Q6P1Q0	sp|Q6P1Q0|LTMD1_HUMAN LETM1 domain-containing protein 1 OS=Homo sapiens OX=9606 GN=LETMD1 PE=1 SV=1	3	2.37079e-05	3.3859e-05	0.00500949	0.00674772	0.700195	-0.514171
EIF4H	Q15056	sp|Q15056|IF4H_HUMAN Eukaryotic translation initiation factor 4H OS=Homo sapiens OX=9606 GN=EIF4H PE=1 SV=5	1	6.13237e-05	1.84035e-05	0.00203369	0.00377155	3.33218	1.73647
SNX6	Q9UNH7	sp|Q9UNH7|SNX6_HUMAN Sorting nexin-6 OS=Homo sapiens OX=9606 GN=SNX6 PE=1 SV=1	6	3.75162e-05	2.83534e-05	0.00520998	0.00690243	1.32316	0.403992
ABCC2	Q92887	sp|Q92887|MRP2_HUMAN Canalicular multispecific organic anion transporter 1 OS=Homo sapiens OX=9606 GN=ABCC2 PE=1 SV=3	13	2.19393e-05	3.89795e-05	0.0124551	0.0124181	0.562842	-0.829199
LEPROT	O15243	sp|O15243|OBRG_HUMAN Leptin receptor gene-related protein OS=Homo sapiens OX=9606 GN=LEPROT PE=1 SV=1	1	2.69292e-05	3.94807e-05	0.0117892	0.0119821	0.682085	-0.551976
MARC1	Q5VT66	sp|Q5VT66|MARC1_HUMAN Mitochondrial amidoxime-reducing component 1 OS=Homo sapiens OX=9606 GN=MARC1 PE=1 SV=1	4	4.57452e-05	2.48942e-05	0.00167045	0.00333464	1.83758	0.877809
ALDH3B1	P43353	sp|P43353|AL3B1_HUMAN Aldehyde dehydrogenase family 3 member B1 OS=Homo sapiens OX=9606 GN=ALDH3B1 PE=1 SV=1;sp|P48448|AL3B2_HUMAN Aldehyde dehydrogenase family 3 member B2 OS=Homo sapiens OX=9606 GN=ALDH3B2 PE=2 SV=3	5	2.80263e-05	3.68041e-05	0.0310798	0.0240386	0.761498	-0.393087
LGALS3BP	Q08380	sp|Q08380|LG3BP_HUMAN Galectin-3-binding protein OS=Homo sapiens OX=9606 GN=LGALS3BP PE=1 SV=1	4	1.67757e-05	4.82522e-05	8.40185e-05	0.000617436	0.347666	-1.52422
LRRC57	Q8N9N7	sp|Q8N9N7|LRC57_HUMAN Leucine-rich repeat-containing protein 57 OS=Homo sapiens OX=9606 GN=LRRC57 PE=1 SV=1	4	2.27225e-05	3.20525e-05	0.000113901	0.00073979	0.708913	-0.496319
MPZL1	O95297	sp|O95297|MPZL1_HUMAN Myelin protein zero-like protein 1 OS=Homo sapiens OX=9606 GN=MPZL1 PE=1 SV=1	2	1.75045e-05	3.19542e-05	0.0143821	0.0137853	0.547799	-0.86828
CDK1	P06493	sp|P06493|CDK1_HUMAN Cyclin-dependent kinase 1 OS=Homo sapiens OX=9606 GN=CDK1 PE=1 SV=3	4	2.44372e-05	3.18382e-05	0.00956063	0.0104042	0.767542	-0.381683
NIPA1	Q7RTP0	sp|Q7RTP0|NIPA1_HUMAN Magnesium transporter NIPA1 OS=Homo sapiens OX=9606 GN=NIPA1 PE=1 SV=1	3	3.9719e-05	1.88559e-05	0.00571918	0.00732039	2.10645	1.07482
DYNC1I2	Q13409	sp|Q13409|DC1I2_HUMAN Cytoplasmic dynein 1 intermediate chain 2 OS=Homo sapiens OX=9606 GN=DYNC1I2 PE=1 SV=3	5	2.07303e-05	3.58751e-05	0.0187883	0.0165625	0.577846	-0.791242
GOLIM4	O00461	sp|O00461|GOLI4_HUMAN Golgi integral membrane protein 4 OS=Homo sapiens OX=9606 GN=GOLIM4 PE=1 SV=1	7	1.75563e-05	4.00438e-05	0.00178473	0.00346453	0.438428	-1.18959
CHORDC1	Q9UHD1	sp|Q9UHD1|CHRD1_HUMAN Cysteine and histidine-rich domain-containing protein 1 OS=Homo sapiens OX=9606 GN=CHORDC1 PE=1 SV=2	3	3.53904e-05	2.67498e-05	0.00220003	0.0039751	1.32301	0.403828
AUH	Q13825	sp|Q13825|AUHM_HUMAN Methylglutaconyl-CoA hydratase, mitochondrial OS=Homo sapiens OX=9606 GN=AUH PE=1 SV=1	3	2.32395e-05	3.32169e-05	0.0208235	0.0178303	0.699628	-0.515341
GALE	Q14376	sp|Q14376|GALE_HUMAN UDP-glucose 4-epimerase OS=Homo sapiens OX=9606 GN=GALE PE=1 SV=2	2	2.44618e-05	3.14042e-05	0.00419396	0.0060612	0.778934	-0.360427
LRRC40	Q9H9A6	sp|Q9H9A6|LRC40_HUMAN Leucine-rich repeat-containing protein 40 OS=Homo sapiens OX=9606 GN=LRRC40 PE=1 SV=1	2	7.83266e-05	1.29867e-05	0.0436402	0.0307915	6.03129	2.59247
ADH4	P08319	sp|P08319|ADH4_HUMAN Alcohol dehydrogenase 4 OS=Homo sapiens OX=9606 GN=ADH4 PE=1 SV=5	5	4.15282e-05	2.73595e-05	2.494e-05	0.000365691	1.51787	0.602052
MRPL45	Q9BRJ2	sp|Q9BRJ2|RM45_HUMAN 39S ribosomal protein L45, mitochondrial OS=Homo sapiens OX=9606 GN=MRPL45 PE=1 SV=2	4	2.77621e-05	3.58425e-05	0.00886624	0.00988214	0.774557	-0.368557
STXBP3	O00186	sp|O00186|STXB3_HUMAN Syntaxin-binding protein 3 OS=Homo sapiens OX=9606 GN=STXBP3 PE=1 SV=2	8	3.27105e-05	2.72393e-05	0.00565137	0.00726042	1.20085	0.264062
F2	P00734	sp|P00734|THRB_HUMAN Prothrombin OS=Homo sapiens OX=9606 GN=F2 PE=1 SV=2	3	1.74352e-05	3.23911e-05	0.0217838	0.0184556	0.538273	-0.893591
SEL1L	Q9UBV2	sp|Q9UBV2|SE1L1_HUMAN Protein sel-1 homolog 1 OS=Homo sapiens OX=9606 GN=SEL1L PE=1 SV=3	8	2.0093e-05	3.63198e-05	0.0062776	0.00780284	0.553225	-0.854061
EEF1E1	O43324	sp|O43324|MCA3_HUMAN Eukaryotic translation elongation factor 1 epsilon-1 OS=Homo sapiens OX=9606 GN=EEF1E1 PE=1 SV=1	3	3.46904e-05	1.5367e-06	0.0403473	0.0291121	22.5746	4.49663
PNP	P00491	sp|P00491|PNPH_HUMAN Purine nucleoside phosphorylase OS=Homo sapiens OX=9606 GN=PNP PE=1 SV=2	6	2.51016e-05	3.13019e-05	0.0188557	0.0166015	0.801918	-0.318473
C8orf82	Q6P1X6	sp|Q6P1X6|CH082_HUMAN UPF0598 protein C8orf82 OS=Homo sapiens OX=9606 GN=C8orf82 PE=1 SV=2	3	2.37246e-05	3.33846e-05	0.00527306	0.00695007	0.710645	-0.492799
VRK1	Q99986	sp|Q99986|VRK1_HUMAN Serine/threonine-protein kinase VRK1 OS=Homo sapiens OX=9606 GN=VRK1 PE=1 SV=1	4	2.46437e-05	3.02084e-05	0.001802	0.00348354	0.815789	-0.293732
ACP2	P11117	sp|P11117|PPAL_HUMAN Lysosomal acid phosphatase OS=Homo sapiens OX=9606 GN=ACP2 PE=1 SV=3	4	2.0117e-05	3.17139e-05	0.000689138	0.00191548	0.634326	-0.656704
UGT2A3	Q6UWM9	sp|Q6UWM9|UD2A3_HUMAN UDP-glucuronosyltransferase 2A3 OS=Homo sapiens OX=9606 GN=UGT2A3 PE=2 SV=2	5	1.75631e-05	4.12122e-05	0.00153776	0.00317492	0.426163	-1.23052
WDR18	Q9BV38	sp|Q9BV38|WDR18_HUMAN WD repeat-containing protein 18 OS=Homo sapiens OX=9606 GN=WDR18 PE=1 SV=2	3	2.97882e-05	2.4811e-05	0.0097285	0.0105267	1.20061	0.263762
PON3	Q15166	sp|Q15166|PON3_HUMAN Serum paraoxonase/lactonase 3 OS=Homo sapiens OX=9606 GN=PON3 PE=1 SV=3	7	3.41715e-05	2.17266e-05	0.00910612	0.0100653	1.5728	0.653333
HDAC1	Q13547	sp|Q13547|HDAC1_HUMAN Histone deacetylase 1 OS=Homo sapiens OX=9606 GN=HDAC1 PE=1 SV=1	3	2.81992e-05	1.75574e-05	0.0321884	0.0246617	1.60611	0.683573
TXNDC12	O95881	sp|O95881|TXD12_HUMAN Thioredoxin domain-containing protein 12 OS=Homo sapiens OX=9606 GN=TXNDC12 PE=1 SV=1	2	1.84536e-05	3.64217e-05	2.70527e-05	0.000379225	0.506665	-0.980897
TMEM30B	Q3MIR4	sp|Q3MIR4|CC50B_HUMAN Cell cycle control protein 50B OS=Homo sapiens OX=9606 GN=TMEM30B PE=1 SV=1	3	2.12937e-05	3.03637e-05	0.0283253	0.0224378	0.701289	-0.511919
RHOT1	Q8IXI2	sp|Q8IXI2|MIRO1_HUMAN Mitochondrial Rho GTPase 1 OS=Homo sapiens OX=9606 GN=RHOT1 PE=1 SV=2	8	1.73366e-05	3.39134e-05	0.000101677	0.000693344	0.511201	-0.968037
DHTKD1	Q96HY7	sp|Q96HY7|DHTK1_HUMAN Probable 2-oxoglutarate dehydrogenase E1 component DHKTD1, mitochondrial OS=Homo sapiens OX=9606 GN=DHTKD1 PE=1 SV=2	7	1.1803e-05	3.871e-05	0.000157417	0.000874476	0.304909	-1.71355
PDPR	Q8NCN5	sp|Q8NCN5|PDPR_HUMAN Pyruvate dehydrogenase phosphatase regulatory subunit, mitochondrial OS=Homo sapiens OX=9606 GN=PDPR PE=1 SV=2	8	1.7897e-05	3.5467e-05	0.0166888	0.0152971	0.504609	-0.986761
DPF2	Q92785	sp|Q92785|REQU_HUMAN Zinc finger protein ubi-d4 OS=Homo sapiens OX=9606 GN=DPF2 PE=1 SV=2	6	3.55273e-05	2.19014e-05	0.0278892	0.0221772	1.62215	0.697904
FOXRED1	Q96CU9	sp|Q96CU9|FXRD1_HUMAN FAD-dependent oxidoreductase domain-containing protein 1 OS=Homo sapiens OX=9606 GN=FOXRED1 PE=1 SV=2	4	2.43631e-05	3.37863e-05	0.039396	0.0286158	0.721094	-0.47174
TXNL1	O43396	sp|O43396|TXNL1_HUMAN Thioredoxin-like protein 1 OS=Homo sapiens OX=9606 GN=TXNL1 PE=1 SV=3	2	4.86938e-05	1.96021e-05	0.00723144	0.00857468	2.48411	1.31273
IGF2	P01344	sp|P01344|IGF2_HUMAN Insulin-like growth factor II OS=Homo sapiens OX=9606 GN=IGF2 PE=1 SV=1	3	2.20344e-08	5.12664e-05	0.00203132	0.00376857	0.000429802	-11.184
CTCF	P49711	sp|P49711|CTCF_HUMAN Transcriptional repressor CTCF OS=Homo sapiens OX=9606 GN=CTCF PE=1 SV=1	7	3.73975e-05	1.52836e-05	0.00328181	0.00516418	2.44689	1.29095
PRKACB	P22694	sp|P22694|KAPCB_HUMAN cAMP-dependent protein kinase catalytic subunit beta OS=Homo sapiens OX=9606 GN=PRKACB PE=1 SV=2;sp|P17612|KAPCA_HUMAN cAMP-dependent protein kinase catalytic subunit alpha OS=Homo sapiens OX=9606 GN=PRKACA PE=1 SV=2	3	1.38848e-05	3.03788e-05	0.000106034	0.000710423	0.457057	-1.12956
CLPX	O76031	sp|O76031|CLPX_HUMAN ATP-dependent Clp protease ATP-binding subunit clpX-like, mitochondrial OS=Homo sapiens OX=9606 GN=CLPX PE=1 SV=2	10	1.50437e-05	3.67259e-05	6.7237e-05	0.0005614	0.409622	-1.28763
GLOD4	Q9HC38	sp|Q9HC38|GLOD4_HUMAN Glyoxalase domain-containing protein 4 OS=Homo sapiens OX=9606 GN=GLOD4 PE=1 SV=1	3	1.89773e-05	3.38695e-05	7.51747e-05	0.000584421	0.560308	-0.835709
GBA	P04062	sp|P04062|GLCM_HUMAN Glucosylceramidase OS=Homo sapiens OX=9606 GN=GBA PE=1 SV=3	5	2.08698e-05	3.02296e-05	0.00566447	0.00727205	0.690375	-0.534548
NUDT19	A8MXV4	sp|A8MXV4|NUD19_HUMAN Nucleoside diphosphate-linked moiety X motif 19 OS=Homo sapiens OX=9606 GN=NUDT19 PE=1 SV=1	4	1.06261e-05	3.91093e-05	0.000175461	0.000925921	0.271703	-1.8799
SMARCA1	P28370	sp|P28370|SMCA1_HUMAN Probable global transcription activator SNF2L1 OS=Homo sapiens OX=9606 GN=SMARCA1 PE=1 SV=2	11	2.04274e-05	3.3602e-05	0.0289956	0.0228344	0.607923	-0.71804
CACYBP	Q9HB71	sp|Q9HB71|CYBP_HUMAN Calcyclin-binding protein OS=Homo sapiens OX=9606 GN=CACYBP PE=1 SV=2	2	2.40417e-05	2.97526e-05	0.0164276	0.0151326	0.808055	-0.307475
MICU1	Q9BPX6	sp|Q9BPX6|MICU1_HUMAN Calcium uptake protein 1, mitochondrial OS=Homo sapiens OX=9606 GN=MICU1 PE=1 SV=1	4	1.59439e-05	3.21452e-05	0.0191031	0.0167439	0.495996	-1.0116
AP1M1	Q9BXS5	sp|Q9BXS5|AP1M1_HUMAN AP-1 complex subunit mu-1 OS=Homo sapiens OX=9606 GN=AP1M1 PE=1 SV=3;sp|Q9Y6Q5|AP1M2_HUMAN AP-1 complex subunit mu-2 OS=Homo sapiens OX=9606 GN=AP1M2 PE=1 SV=4	5	3.0891e-05	1.8491e-05	0.00595726	0.00752743	1.67059	0.740359
TKFC	Q3LXA3	sp|Q3LXA3|TKFC_HUMAN Triokinase/FMN cyclase OS=Homo sapiens OX=9606 GN=TKFC PE=1 SV=2	7	3.02588e-05	2.40387e-05	0.0065502	0.00803092	1.25875	0.331996
FMO5	P49326	sp|P49326|FMO5_HUMAN Dimethylaniline monooxygenase [N-oxide-forming] 5 OS=Homo sapiens OX=9606 GN=FMO5 PE=1 SV=2	8	2.05675e-05	3.6564e-05	7.06645e-05	0.000571745	0.562507	-0.830057
PSMD12	O00232	sp|O00232|PSD12_HUMAN 26S proteasome non-ATPase regulatory subunit 12 OS=Homo sapiens OX=9606 GN=PSMD12 PE=1 SV=3	4	2.95852e-05	1.70067e-05	0.000863109	0.00220355	1.73962	0.798772
FUBP3	Q96I24	sp|Q96I24|FUBP3_HUMAN Far upstream element-binding protein 3 OS=Homo sapiens OX=9606 GN=FUBP3 PE=1 SV=2	7	1.8677e-05	3.13418e-05	0.000155832	0.000870259	0.595914	-0.746824
EIF4G2	P78344	sp|P78344|IF4G2_HUMAN Eukaryotic translation initiation factor 4 gamma 2 OS=Homo sapiens OX=9606 GN=EIF4G2 PE=1 SV=1	9	3.21352e-05	1.93551e-05	0.000867432	0.00221077	1.6603	0.731445
LEMD2	Q8NC56	sp|Q8NC56|LEMD2_HUMAN LEM domain-containing protein 2 OS=Homo sapiens OX=9606 GN=LEMD2 PE=1 SV=1	6	2.89688e-05	2.06936e-05	0.0117521	0.0119573	1.39989	0.485317
LNPEP	Q9UIQ6	sp|Q9UIQ6|LCAP_HUMAN Leucyl-cystinyl aminopeptidase OS=Homo sapiens OX=9606 GN=LNPEP PE=1 SV=3	11	1.90141e-05	2.58308e-05	0.00545777	0.00708676	0.736101	-0.442024
POLR2E	P19388	sp|P19388|RPAB1_HUMAN DNA-directed RNA polymerases I, II, and III subunit RPABC1 OS=Homo sapiens OX=9606 GN=POLR2E PE=1 SV=4	3	1.07129e-05	2.42003e-05	0.000210085	0.00102422	0.442676	-1.17568
AIG1	Q9NVV5	sp|Q9NVV5|AIG1_HUMAN Androgen-induced gene 1 protein OS=Homo sapiens OX=9606 GN=AIG1 PE=1 SV=2	1	3.15754e-05	1.93372e-05	0.00237617	0.00417953	1.63288	0.707423
PSMD5	Q16401	sp|Q16401|PSMD5_HUMAN 26S proteasome non-ATPase regulatory subunit 5 OS=Homo sapiens OX=9606 GN=PSMD5 PE=1 SV=3	5	1.64729e-05	2.36196e-05	0.0382513	0.0280097	0.697425	-0.519889
GPAT3	Q53EU6	sp|Q53EU6|GPAT3_HUMAN Glycerol-3-phosphate acyltransferase 3 OS=Homo sapiens OX=9606 GN=GPAT3 PE=1 SV=2	5	2.72406e-05	1.60944e-05	0.0236779	0.0196512	1.69255	0.759201
CSTF2	P33240	sp|P33240|CSTF2_HUMAN Cleavage stimulation factor subunit 2 OS=Homo sapiens OX=9606 GN=CSTF2 PE=1 SV=1	2	1.97183e-05	2.53744e-05	0.000343418	0.00131807	0.777093	-0.363841
YAP1	P46937	sp|P46937|YAP1_HUMAN Transcriptional coactivator YAP1 OS=Homo sapiens OX=9606 GN=YAP1 PE=1 SV=2	3	1.89285e-05	4.50033e-05	0.0338906	0.0256078	0.420601	-1.24947
QARS	P47897	sp|P47897|SYQ_HUMAN Glutamine--tRNA ligase OS=Homo sapiens OX=9606 GN=QARS PE=1 SV=1	9	2.67952e-05	2.00457e-05	0.000147815	0.000848217	1.3367	0.418678
HAVCR1	Q96D42	sp|Q96D42|HAVR1_HUMAN Hepatitis A virus cellular receptor 1 OS=Homo sapiens OX=9606 GN=HAVCR1 PE=1 SV=2	3	4.50319e-07	5.35379e-05	0.0490142	0.0335924	0.00841121	-6.89347
SH3BGRL	O75368	sp|O75368|SH3L1_HUMAN SH3 domain-binding glutamic acid-rich-like protein OS=Homo sapiens OX=9606 GN=SH3BGRL PE=1 SV=1	2	3.12967e-05	2.31062e-05	0.00986128	0.0106227	1.35447	0.437731
BAG2	O95816	sp|O95816|BAG2_HUMAN BAG family molecular chaperone regulator 2 OS=Homo sapiens OX=9606 GN=BAG2 PE=1 SV=1	2	2.7792e-05	2.04708e-05	0.000123659	0.000773809	1.35764	0.441104
TCOF1	Q13428	sp|Q13428|TCOF_HUMAN Treacle protein OS=Homo sapiens OX=9606 GN=TCOF1 PE=1 SV=3	16	2.91455e-05	1.78884e-05	0.0094904	0.0103525	1.6293	0.70425
PCCA	P05165	sp|P05165|PCCA_HUMAN Propionyl-CoA carboxylase alpha chain, mitochondrial OS=Homo sapiens OX=9606 GN=PCCA PE=1 SV=4	6	1.78929e-05	2.48607e-05	0.0159792	0.0148463	0.719729	-0.474475
PBLD	P30039	sp|P30039|PBLD_HUMAN Phenazine biosynthesis-like domain-containing protein OS=Homo sapiens OX=9606 GN=PBLD PE=1 SV=2	2	1.33927e-05	2.52569e-05	3.13692e-05	0.000406257	0.530258	-0.915233
PPOX	P50336	sp|P50336|PPOX_HUMAN Protoporphyrinogen oxidase OS=Homo sapiens OX=9606 GN=PPOX PE=1 SV=1	6	2.87692e-05	1.31885e-05	0.000387114	0.00140629	2.1814	1.12525
ABCB10	Q9NRK6	sp|Q9NRK6|ABCBA_HUMAN ATP-binding cassette sub-family B member 10, mitochondrial OS=Homo sapiens OX=9606 GN=ABCB10 PE=1 SV=2	11	2.33115e-05	1.70719e-05	0.0109175	0.0113852	1.36548	0.449413
EDC4	Q6P2E9	sp|Q6P2E9|EDC4_HUMAN Enhancer of mRNA-decapping protein 4 OS=Homo sapiens OX=9606 GN=EDC4 PE=1 SV=1	9	3.92815e-05	8.04198e-06	0.000115165	0.000744341	4.88456	2.28823
NCSTN	Q92542	sp|Q92542|NICA_HUMAN Nicastrin OS=Homo sapiens OX=9606 GN=NCSTN PE=1 SV=2	4	2.88847e-05	1.49875e-05	0.000188059	0.000963506	1.92726	0.946549
SLC44A1	Q8WWI5	sp|Q8WWI5|CTL1_HUMAN Choline transporter-like protein 1 OS=Homo sapiens OX=9606 GN=SLC44A1 PE=1 SV=1	3	1.74785e-05	2.80977e-05	0.00267646	0.00450414	0.622062	-0.68487
FUT8	Q9BYC5	sp|Q9BYC5|FUT8_HUMAN Alpha-(1,6)-fucosyltransferase OS=Homo sapiens OX=9606 GN=FUT8 PE=1 SV=2	6	1.67865e-05	2.588e-05	2.77561e-05	0.000383471	0.64863	-0.624533
BCL2L1	Q07817	sp|Q07817|B2CL1_HUMAN Bcl-2-like protein 1 OS=Homo sapiens OX=9606 GN=BCL2L1 PE=1 SV=1	2	4.93275e-05	1.47957e-05	8.65305e-06	0.000229901	3.33391	1.73721
CBLB	Q13191	sp|Q13191|CBLB_HUMAN E3 ubiquitin-protein ligase CBL-B OS=Homo sapiens OX=9606 GN=CBLB PE=1 SV=2	2	1.74723e-05	2.73556e-05	0.00248528	0.00430082	0.638711	-0.646765
THNSL1	Q8IYQ7	sp|Q8IYQ7|THNS1_HUMAN Threonine synthase-like 1 OS=Homo sapiens OX=9606 GN=THNSL1 PE=1 SV=2	6	1.74322e-05	2.79703e-05	0.00705281	0.00843558	0.623238	-0.682145
MTFP1	Q9UDX5	sp|Q9UDX5|MTFP1_HUMAN Mitochondrial fission process protein 1 OS=Homo sapiens OX=9606 GN=MTFP1 PE=1 SV=1	2	2.71442e-05	1.7621e-05	0.000835055	0.00215613	1.54044	0.623346
ITGA6	P23229	sp|P23229|ITA6_HUMAN Integrin alpha-6 OS=Homo sapiens OX=9606 GN=ITGA6 PE=1 SV=5	14	1.89847e-05	2.61522e-05	0.0194229	0.0169261	0.725933	-0.462092
NDUFS4	O43181	sp|O43181|NDUS4_HUMAN NADH dehydrogenase [ubiquinone] iron-sulfur protein 4, mitochondrial OS=Homo sapiens OX=9606 GN=NDUFS4 PE=1 SV=1	3	1.98593e-05	1.36403e-05	0.0268036	0.0215209	1.45593	0.541943
ABCB7	O75027	sp|O75027|ABCB7_HUMAN ATP-binding cassette sub-family B member 7, mitochondrial OS=Homo sapiens OX=9606 GN=ABCB7 PE=1 SV=2	9	2.0326e-05	2.47529e-05	0.00964062	0.0104628	0.821156	-0.284272
EPB41L1	Q9H4G0	sp|Q9H4G0|E41L1_HUMAN Band 4.1-like protein 1 OS=Homo sapiens OX=9606 GN=EPB41L1 PE=1 SV=2	7	1.84946e-05	2.53673e-05	0.000769604	0.00204166	0.729071	-0.455868
EPS8L3	Q8TE67	sp|Q8TE67|ES8L3_HUMAN Epidermal growth factor receptor kinase substrate 8-like protein 3 OS=Homo sapiens OX=9606 GN=EPS8L3 PE=1 SV=2	6	1.82817e-05	2.41268e-05	0.014416	0.0138086	0.757734	-0.400237
BCLAF1	Q9NYF8	sp|Q9NYF8|BCLF1_HUMAN Bcl-2-associated transcription factor 1 OS=Homo sapiens OX=9606 GN=BCLAF1 PE=1 SV=2	4	2.07837e-05	2.80185e-05	0.000509796	0.00163668	0.741786	-0.430924
PSMD6	Q15008	sp|Q15008|PSMD6_HUMAN 26S proteasome non-ATPase regulatory subunit 6 OS=Homo sapiens OX=9606 GN=PSMD6 PE=1 SV=1	5	1.52122e-05	2.11879e-05	0.0293506	0.0230426	0.717966	-0.478013
NECTIN2	Q92692	sp|Q92692|NECT2_HUMAN Nectin-2 OS=Homo sapiens OX=9606 GN=NECTIN2 PE=1 SV=1	5	1.94304e-05	2.46881e-05	0.0454139	0.031701	0.787034	-0.345503
SIRT5	Q9NXA8	sp|Q9NXA8|SIR5_HUMAN NAD-dependent protein deacylase sirtuin-5, mitochondrial OS=Homo sapiens OX=9606 GN=SIRT5 PE=1 SV=2	3	1.57881e-05	2.86117e-05	0.0177078	0.0159236	0.551805	-0.85777
NDFIP1	Q9BT67	sp|Q9BT67|NFIP1_HUMAN NEDD4 family-interacting protein 1 OS=Homo sapiens OX=9606 GN=NDFIP1 PE=1 SV=1	3	9.3623e-06	2.59563e-05	0.0388983	0.0283535	0.360694	-1.47115
MCM7	P33993	sp|P33993|MCM7_HUMAN DNA replication licensing factor MCM7 OS=Homo sapiens OX=9606 GN=MCM7 PE=1 SV=4	6	2.37397e-05	1.91803e-05	0.0401873	0.0290291	1.23772	0.307681
GPX1	P07203	sp|P07203|GPX1_HUMAN Glutathione peroxidase 1 OS=Homo sapiens OX=9606 GN=GPX1 PE=1 SV=4	3	4.98193e-06	2.96081e-05	0.0127077	0.0125985	0.168263	-2.57121
GRN	P28799	sp|P28799|GRN_HUMAN Granulins OS=Homo sapiens OX=9606 GN=GRN PE=1 SV=2	6	1.00319e-05	3.77702e-05	9.09663e-06	0.000234386	0.265604	-1.91265
DHRSX	Q8N5I4	sp|Q8N5I4|DHRSX_HUMAN Dehydrogenase/reductase SDR family member on chromosome X OS=Homo sapiens OX=9606 GN=DHRSX PE=1 SV=2	2	2.24188e-05	1.80287e-05	0.0153341	0.0144257	1.24351	0.314416
EIF3A	Q14152	sp|Q14152|EIF3A_HUMAN Eukaryotic translation initiation factor 3 subunit A OS=Homo sapiens OX=9606 GN=EIF3A PE=1 SV=1	13	2.39712e-05	1.59634e-05	0.0244045	0.020097	1.50163	0.586533
TPD52L1	Q16890	sp|Q16890|TPD53_HUMAN Tumor protein D53 OS=Homo sapiens OX=9606 GN=TPD52L1 PE=1 SV=1	1	3.07926e-05	1.65385e-05	0.00057968	0.00175271	1.86187	0.896751
LSM4	Q9Y4Z0	sp|Q9Y4Z0|LSM4_HUMAN U6 snRNA-associated Sm-like protein LSm4 OS=Homo sapiens OX=9606 GN=LSM4 PE=1 SV=1	2	9.68971e-06	1.32508e-05	0.00470292	0.00650088	0.731253	-0.451557
GPRC5C	Q9NQ84	sp|Q9NQ84|GPC5C_HUMAN G-protein coupled receptor family C group 5 member C OS=Homo sapiens OX=9606 GN=GPRC5C PE=1 SV=2	3	1.66456e-05	2.25701e-05	0.020772	0.0177963	0.737507	-0.43927
FAM57A	Q8TBR7	sp|Q8TBR7|FA57A_HUMAN Protein FAM57A OS=Homo sapiens OX=9606 GN=FAM57A PE=1 SV=2	2	2.02323e-05	2.53835e-05	0.00507218	0.00679665	0.797065	-0.327232
LYAR	Q9NX58	sp|Q9NX58|LYAR_HUMAN Cell growth-regulating nucleolar protein OS=Homo sapiens OX=9606 GN=LYAR PE=1 SV=2	2	2.06672e-05	1.64196e-05	0.0418215	0.0298684	1.2587	0.331931
AARS2	Q5JTZ9	sp|Q5JTZ9|SYAM_HUMAN Alanine--tRNA ligase, mitochondrial OS=Homo sapiens OX=9606 GN=AARS2 PE=1 SV=1	8	1.67058e-05	2.22007e-05	0.0263613	0.0212638	0.752489	-0.410258
PELP1	Q8IZL8	sp|Q8IZL8|PELP1_HUMAN Proline-, glutamic acid- and leucine-rich protein 1 OS=Homo sapiens OX=9606 GN=PELP1 PE=1 SV=2	8	2.67847e-05	1.28222e-05	0.001815	0.00349775	2.08893	1.06276
PARD6B	Q9BYG5	sp|Q9BYG5|PAR6B_HUMAN Partitioning defective 6 homolog beta OS=Homo sapiens OX=9606 GN=PARD6B PE=1 SV=1	2	2.44206e-05	1.81194e-05	0.00101532	0.00245388	1.34776	0.430567
DCTN2	Q13561	sp|Q13561|DCTN2_HUMAN Dynactin subunit 2 OS=Homo sapiens OX=9606 GN=DCTN2 PE=1 SV=4	6	1.88855e-05	2.42701e-05	0.0135182	0.013183	0.778139	-0.3619
ALG1	Q9BT22	sp|Q9BT22|ALG1_HUMAN Chitobiosyldiphosphodolichol beta-mannosyltransferase OS=Homo sapiens OX=9606 GN=ALG1 PE=1 SV=2	3	1.81852e-05	3.18584e-05	5.97005e-05	0.00053615	0.570811	-0.808914
ITGA5	P08648	sp|P08648|ITA5_HUMAN Integrin alpha-5 OS=Homo sapiens OX=9606 GN=ITGA5 PE=1 SV=2	6	1.37373e-05	2.54298e-05	0.0043277	0.00618056	0.540203	-0.888426
PI4K2A	Q9BTU6	sp|Q9BTU6|P4K2A_HUMAN Phosphatidylinositol 4-kinase type 2-alpha OS=Homo sapiens OX=9606 GN=PI4K2A PE=1 SV=1	8	1.20133e-05	2.27853e-05	0.0152088	0.0143428	0.527237	-0.923476
KPNA3	O00505	sp|O00505|IMA4_HUMAN Importin subunit alpha-4 OS=Homo sapiens OX=9606 GN=KPNA3 PE=1 SV=2	2	1.41663e-05	1.91641e-05	0.00113505	0.002635	0.739209	-0.435946
PSMC3	P17980	sp|P17980|PRS6A_HUMAN 26S proteasome regulatory subunit 6A OS=Homo sapiens OX=9606 GN=PSMC3 PE=1 SV=3	7	2.18178e-05	1.49359e-05	0.00143174	0.00303929	1.46076	0.546717
MMP14	P50281	sp|P50281|MMP14_HUMAN Matrix metalloproteinase-14 OS=Homo sapiens OX=9606 GN=MMP14 PE=1 SV=3	4	7.43251e-06	3.3873e-05	0.000158088	0.000876248	0.219423	-2.18822
PFDN5	Q99471	sp|Q99471|PFD5_HUMAN Prefoldin subunit 5 OS=Homo sapiens OX=9606 GN=PFDN5 PE=1 SV=2	2	2.65756e-05	1.37488e-05	0.0379804	0.0278648	1.93294	0.950794
NUP153	P49790	sp|P49790|NU153_HUMAN Nuclear pore complex protein Nup153 OS=Homo sapiens OX=9606 GN=NUP153 PE=1 SV=2	3	1.04108e-06	3.81114e-05	1.97738e-07	4.09785e-05	0.0273167	-5.19407
MLYCD	O95822	sp|O95822|DCMC_HUMAN Malonyl-CoA decarboxylase, mitochondrial OS=Homo sapiens OX=9606 GN=MLYCD PE=1 SV=3	5	1.32018e-05	2.42037e-05	0.00292347	0.00476661	0.545444	-0.874496
CTBP1	Q13363	sp|Q13363|CTBP1_HUMAN C-terminal-binding protein 1 OS=Homo sapiens OX=9606 GN=CTBP1 PE=1 SV=2;sp|P56545|CTBP2_HUMAN C-terminal-binding protein 2 OS=Homo sapiens OX=9606 GN=CTBP2 PE=1 SV=1	4	1.42585e-05	2.72132e-05	0.015794	0.0147266	0.523957	-0.932481
SART1	O43290	sp|O43290|SNUT1_HUMAN U4/U6.U5 tri-snRNP-associated protein 1 OS=Homo sapiens OX=9606 GN=SART1 PE=1 SV=1	7	2.56898e-05	1.5804e-05	0.000145159	0.000840647	1.62552	0.700903
ABCF1	Q8NE71	sp|Q8NE71|ABCF1_HUMAN ATP-binding cassette sub-family F member 1 OS=Homo sapiens OX=9606 GN=ABCF1 PE=1 SV=2	6	2.28971e-05	1.62243e-05	0.000257302	0.0011364	1.41128	0.497007
PITPNB	P48739	sp|P48739|PIPNB_HUMAN Phosphatidylinositol transfer protein beta isoform OS=Homo sapiens OX=9606 GN=PITPNB PE=1 SV=2	2	2.21997e-05	1.76661e-05	0.045939	0.0319812	1.25662	0.329553
TOP2A	P11388	sp|P11388|TOP2A_HUMAN DNA topoisomerase 2-alpha OS=Homo sapiens OX=9606 GN=TOP2A PE=1 SV=3	11	1.22265e-05	2.01872e-05	0.00139879	0.00299557	0.605657	-0.723427
CHST13	Q8NET6	sp|Q8NET6|CHSTD_HUMAN Carbohydrate sulfotransferase 13 OS=Homo sapiens OX=9606 GN=CHST13 PE=1 SV=1	4	1.37265e-05	2.51657e-05	0.0102825	0.0109304	0.545443	-0.874501
FCGRT	P55899	sp|P55899|FCGRN_HUMAN IgG receptor FcRn large subunit p51 OS=Homo sapiens OX=9606 GN=FCGRT PE=1 SV=1	3	1.03146e-05	2.3738e-05	0.0461245	0.0320798	0.434517	-1.20252
MRPL20	Q9BYC9	sp|Q9BYC9|RM20_HUMAN 39S ribosomal protein L20, mitochondrial OS=Homo sapiens OX=9606 GN=MRPL20 PE=1 SV=1	2	8.11687e-06	3.60838e-05	0.00303037	0.0048882	0.224945	-2.15235
PNO1	Q9NRX1	sp|Q9NRX1|PNO1_HUMAN RNA-binding protein PNO1 OS=Homo sapiens OX=9606 GN=PNO1 PE=1 SV=1	3	2.4197e-05	1.74177e-05	0.000693543	0.00192149	1.38922	0.474274
GOLGA7	Q7Z5G4	sp|Q7Z5G4|GOGA7_HUMAN Golgin subfamily A member 7 OS=Homo sapiens OX=9606 GN=GOLGA7 PE=1 SV=2	2	6.94403e-06	2.61635e-05	0.000248467	0.00111705	0.265409	-1.91371
HSPG2	P98160	sp|P98160|PGBM_HUMAN Basement membrane-specific heparan sulfate proteoglycan core protein OS=Homo sapiens OX=9606 GN=HSPG2 PE=1 SV=4	26	1.51687e-05	1.97556e-05	0.0146	0.0139341	0.767818	-0.381164
SERINC1	Q9NRX5	sp|Q9NRX5|SERC1_HUMAN Serine incorporator 1 OS=Homo sapiens OX=9606 GN=SERINC1 PE=1 SV=1	3	2.81176e-06	3.14612e-05	6.48736e-05	0.000553872	0.0893723	-3.48403
CAPRIN1	Q14444	sp|Q14444|CAPR1_HUMAN Caprin-1 OS=Homo sapiens OX=9606 GN=CAPRIN1 PE=1 SV=2	2	1.54997e-05	1.94831e-05	0.0051998	0.0068947	0.795547	-0.329981
WLS	Q5T9L3	sp|Q5T9L3|WLS_HUMAN Protein wntless homolog OS=Homo sapiens OX=9606 GN=WLS PE=1 SV=2	4	1.37018e-05	2.11465e-05	0.00975476	0.0105458	0.647945	-0.626058
GM2A	P17900	sp|P17900|SAP3_HUMAN Ganglioside GM2 activator OS=Homo sapiens OX=9606 GN=GM2A PE=1 SV=4	1	1.31706e-05	2.82856e-05	0.000110962	0.000729031	0.465627	-1.10275
EIF3B	P55884	sp|P55884|EIF3B_HUMAN Eukaryotic translation initiation factor 3 subunit B OS=Homo sapiens OX=9606 GN=EIF3B PE=1 SV=3	8	2.11823e-05	1.70669e-05	0.0434992	0.0307197	1.24114	0.311663
KDM1A	O60341	sp|O60341|KDM1A_HUMAN Lysine-specific histone demethylase 1A OS=Homo sapiens OX=9606 GN=KDM1A PE=1 SV=2	4	1.38028e-05	1.94744e-05	0.046481	0.0322689	0.708767	-0.496617
C2orf72	A6NCS6	sp|A6NCS6|CB072_HUMAN Uncharacterized protein C2orf72 OS=Homo sapiens OX=9606 GN=C2orf72 PE=1 SV=2	4	9.2782e-06	3.93475e-05	0.000188578	0.000965008	0.235802	-2.08435
D2HGDH	Q8N465	sp|Q8N465|D2HDH_HUMAN D-2-hydroxyglutarate dehydrogenase, mitochondrial OS=Homo sapiens OX=9606 GN=D2HGDH PE=1 SV=3	4	9.93724e-06	2.41415e-05	0.00289762	0.00473682	0.411624	-1.2806
MORF4L1	Q9UBU8	sp|Q9UBU8|MO4L1_HUMAN Mortality factor 4-like protein 1 OS=Homo sapiens OX=9606 GN=MORF4L1 PE=1 SV=2	2	1.52091e-05	1.99912e-05	0.0013208	0.00289047	0.760793	-0.394424
PTP4A2	Q12974	sp|Q12974|TP4A2_HUMAN Protein tyrosine phosphatase type IVA 2 OS=Homo sapiens OX=9606 GN=PTP4A2 PE=1 SV=1	1	1.32007e-05	1.93851e-05	0.000864918	0.00220657	0.680969	-0.55434
SEC11A	P67812	sp|P67812|SC11A_HUMAN Signal peptidase complex catalytic subunit SEC11A OS=Homo sapiens OX=9606 GN=SEC11A PE=1 SV=1	3	2.19291e-05	8.80427e-06	0.00693429	0.00834196	2.49073	1.31657
FAM177A1	Q8N128	sp|Q8N128|F177A_HUMAN Protein FAM177A1 OS=Homo sapiens OX=9606 GN=FAM177A1 PE=1 SV=1	3	1.18722e-05	2.512e-05	0.0040379	0.00591825	0.472621	-1.08124
MDK	P21741	sp|P21741|MK_HUMAN Midkine OS=Homo sapiens OX=9606 GN=MDK PE=1 SV=1	1	2.20344e-08	3.41672e-05	0.0117255	0.0119395	0.000644899	-10.5986
CARS2	Q9HA77	sp|Q9HA77|SYCM_HUMAN Probable cysteine--tRNA ligase, mitochondrial OS=Homo sapiens OX=9606 GN=CARS2 PE=1 SV=1	3	1.49693e-05	1.81163e-05	0.0005728	0.00174152	0.826288	-0.275284
NANS	Q9NR45	sp|Q9NR45|SIAS_HUMAN Sialic acid synthase OS=Homo sapiens OX=9606 GN=NANS PE=1 SV=2	3	2.45677e-05	1.38979e-05	0.0074263	0.00872793	1.76773	0.821898
CDKN2AIPNL	Q96HQ2	sp|Q96HQ2|C2AIL_HUMAN CDKN2AIP N-terminal-like protein OS=Homo sapiens OX=9606 GN=CDKN2AIPNL PE=1 SV=1	1	2.60217e-05	1.50475e-05	0.000796467	0.0020891	1.7293	0.790189
WDR82	Q6UXN9	sp|Q6UXN9|WDR82_HUMAN WD repeat-containing protein 82 OS=Homo sapiens OX=9606 GN=WDR82 PE=1 SV=1	3	1.17516e-05	1.95781e-05	0.0457215	0.0318653	0.600241	-0.736387
CST3	P01034	sp|P01034|CYTC_HUMAN Cystatin-C OS=Homo sapiens OX=9606 GN=CST3 PE=1 SV=1	1	4.42017e-06	2.77169e-05	0.000534766	0.00167838	0.159475	-2.64859
POFUT1	Q9H488	sp|Q9H488|OFUT1_HUMAN GDP-fucose protein O-fucosyltransferase 1 OS=Homo sapiens OX=9606 GN=POFUT1 PE=1 SV=1	3	8.46896e-06	3.07433e-05	0.00582926	0.00741678	0.275474	-1.86001
GCN1	Q92616	sp|Q92616|GCN1_HUMAN eIF-2-alpha kinase activator GCN1 OS=Homo sapiens OX=9606 GN=GCN1 PE=1 SV=6	28	1.87747e-05	1.48367e-05	0.025862	0.0209706	1.26542	0.339618
TBRG4	Q969Z0	sp|Q969Z0|FAKD4_HUMAN FAST kinase domain-containing protein 4 OS=Homo sapiens OX=9606 GN=TBRG4 PE=1 SV=1	2	1.34254e-05	1.99358e-05	0.0230598	0.0192665	0.673434	-0.570393
NXF1	Q9UBU9	sp|Q9UBU9|NXF1_HUMAN Nuclear RNA export factor 1 OS=Homo sapiens OX=9606 GN=NXF1 PE=1 SV=1	5	2.65881e-05	1.42792e-05	0.0228147	0.0191124	1.86201	0.896864
TFB2M	Q9H5Q4	sp|Q9H5Q4|TFB2M_HUMAN Dimethyladenosine transferase 2, mitochondrial OS=Homo sapiens OX=9606 GN=TFB2M PE=1 SV=1	4	6.32507e-06	1.37718e-05	0.0167144	0.0153131	0.459279	-1.12256
TMTC3	Q6ZXV5	sp|Q6ZXV5|TMTC3_HUMAN Transmembrane and TPR repeat-containing protein 3 OS=Homo sapiens OX=9606 GN=TMTC3 PE=1 SV=2	5	1.44282e-05	1.77621e-05	0.0122911	0.0123122	0.8123	-0.299916
DLG1	Q12959	sp|Q12959|DLG1_HUMAN Disks large homolog 1 OS=Homo sapiens OX=9606 GN=DLG1 PE=1 SV=2	5	1.2834e-05	2.38818e-05	0.020986	0.017937	0.537396	-0.895943
SYF2	O95926	sp|O95926|SYF2_HUMAN Pre-mRNA-splicing factor SYF2 OS=Homo sapiens OX=9606 GN=SYF2 PE=1 SV=1	1	2.71953e-05	1.04087e-05	0.0428262	0.0303751	2.61275	1.38557
SIRT3	Q9NTG7	sp|Q9NTG7|SIR3_HUMAN NAD-dependent protein deacetylase sirtuin-3, mitochondrial OS=Homo sapiens OX=9606 GN=SIRT3 PE=1 SV=2	2	9.36114e-06	2.16352e-05	0.031248	0.0241339	0.432681	-1.20862
AIMP1	Q12904	sp|Q12904|AIMP1_HUMAN Aminoacyl tRNA synthase complex-interacting multifunctional protein 1 OS=Homo sapiens OX=9606 GN=AIMP1 PE=1 SV=2	4	2.2813e-05	1.26069e-05	0.00301616	0.00487219	1.80956	0.855637
POLG	P54098	sp|P54098|DPOG1_HUMAN DNA polymerase subunit gamma-1 OS=Homo sapiens OX=9606 GN=POLG PE=1 SV=1	4	1.05661e-05	1.37357e-05	0.00145721	0.00307257	0.769241	-0.378492
SAE1	Q9UBE0	sp|Q9UBE0|SAE1_HUMAN SUMO-activating enzyme subunit 1 OS=Homo sapiens OX=9606 GN=SAE1 PE=1 SV=1	4	1.92574e-05	1.24714e-05	0.0163803	0.0151026	1.54413	0.626793
CSTA	P01040	sp|P01040|CYTA_HUMAN Cystatin-A OS=Homo sapiens OX=9606 GN=CSTA PE=1 SV=1	2	1.14549e-06	6.27309e-06	0.0353745	0.0264421	0.182604	-2.45321
TEX264	Q9Y6I9	sp|Q9Y6I9|TX264_HUMAN Testis-expressed protein 264 OS=Homo sapiens OX=9606 GN=TEX264 PE=1 SV=1	2	1.75412e-05	8.67781e-06	7.95066e-05	0.00059698	2.02138	1.01534
RBBP7	Q16576	sp|Q16576|RBBP7_HUMAN Histone-binding protein RBBP7 OS=Homo sapiens OX=9606 GN=RBBP7 PE=1 SV=1	2	2.21563e-05	6.37422e-06	0.0144863	0.0138566	3.47592	1.7974
PDCD6	O75340	sp|O75340|PDCD6_HUMAN Programmed cell death protein 6 OS=Homo sapiens OX=9606 GN=PDCD6 PE=1 SV=1	5	2.5842e-05	1.1719e-05	0.000375248	0.00138328	2.20514	1.14087
ARGLU1	Q9NWB6	sp|Q9NWB6|ARGL1_HUMAN Arginine and glutamate-rich protein 1 OS=Homo sapiens OX=9606 GN=ARGLU1 PE=1 SV=1	2	9.1149e-06	2.63679e-05	0.00181661	0.0034995	0.345682	-1.53248
ACO1	P21399	sp|P21399|ACOC_HUMAN Cytoplasmic aconitate hydratase OS=Homo sapiens OX=9606 GN=ACO1 PE=1 SV=3	7	2.25267e-05	1.30981e-05	0.0143592	0.0137697	1.71984	0.782275
SH3GL1	Q99961	sp|Q99961|SH3G1_HUMAN Endophilin-A2 OS=Homo sapiens OX=9606 GN=SH3GL1 PE=1 SV=1	3	1.76832e-05	9.05254e-06	3.54815e-05	0.000428949	1.9534	0.965986
UBE2I	P63279	sp|P63279|UBC9_HUMAN SUMO-conjugating enzyme UBC9 OS=Homo sapiens OX=9606 GN=UBE2I PE=1 SV=1	2	2.91258e-05	1.22887e-05	0.0188963	0.016625	2.37014	1.24497
LAMA5	O15230	sp|O15230|LAMA5_HUMAN Laminin subunit alpha-5 OS=Homo sapiens OX=9606 GN=LAMA5 PE=1 SV=8	25	1.36567e-05	1.98624e-05	0.00262618	0.00445176	0.687566	-0.540431
CCNYL1	Q8N7R7	sp|Q8N7R7|CCYL1_HUMAN Cyclin-Y-like protein 1 OS=Homo sapiens OX=9606 GN=CCNYL1 PE=1 SV=2	2	1.29383e-05	1.79758e-05	0.00485248	0.0066229	0.719758	-0.474415
TARS2	Q9BW92	sp|Q9BW92|SYTM_HUMAN Threonine--tRNA ligase, mitochondrial OS=Homo sapiens OX=9606 GN=TARS2 PE=1 SV=1	7	1.07745e-05	2.28146e-05	0.00348105	0.00537346	0.472266	-1.08233
KMT2C	Q8NEZ4	sp|Q8NEZ4|KMT2C_HUMAN Histone-lysine N-methyltransferase 2C OS=Homo sapiens OX=9606 GN=KMT2C PE=1 SV=3	2	7.50783e-06	2.01639e-05	1.12075e-05	0.000252485	0.37234	-1.42531
MRPL44	Q9H9J2	sp|Q9H9J2|RM44_HUMAN 39S ribosomal protein L44, mitochondrial OS=Homo sapiens OX=9606 GN=MRPL44 PE=1 SV=1	5	8.524e-06	1.60217e-05	0.000246314	0.00111222	0.532028	-0.910427
LAMB1	P07942	sp|P07942|LAMB1_HUMAN Laminin subunit beta-1 OS=Homo sapiens OX=9606 GN=LAMB1 PE=1 SV=2	11	1.06173e-05	2.14747e-05	0.00258023	0.00440322	0.494412	-1.01621
MRPS30	Q9NP92	sp|Q9NP92|RT30_HUMAN 39S ribosomal protein S30, mitochondrial OS=Homo sapiens OX=9606 GN=MRPS30 PE=1 SV=2	2	1.32445e-05	1.71928e-05	0.00626072	0.00778851	0.770354	-0.376406
EHD4	Q9H223	sp|Q9H223|EHD4_HUMAN EH domain-containing protein 4 OS=Homo sapiens OX=9606 GN=EHD4 PE=1 SV=1	4	2.18669e-05	1.33442e-05	0.00067632	0.00189779	1.63869	0.71254
RAB13	P51153	sp|P51153|RAB13_HUMAN Ras-related protein Rab-13 OS=Homo sapiens OX=9606 GN=RAB13 PE=1 SV=1	1	1.74584e-05	1.40835e-05	0.0173976	0.0157354	1.23964	0.309917
NOC3L	Q8WTT2	sp|Q8WTT2|NOC3L_HUMAN Nucleolar complex protein 3 homolog OS=Homo sapiens OX=9606 GN=NOC3L PE=1 SV=1	4	9.66242e-06	1.35439e-05	0.000638199	0.00184313	0.713415	-0.487186
LARS2	Q15031	sp|Q15031|SYLM_HUMAN Probable leucine--tRNA ligase, mitochondrial OS=Homo sapiens OX=9606 GN=LARS2 PE=1 SV=2	8	1.18392e-05	2.20377e-05	0.00508872	0.00680947	0.537224	-0.896404
ACIN1	Q9UKV3	sp|Q9UKV3|ACINU_HUMAN Apoptotic chromatin condensation inducer in the nucleus OS=Homo sapiens OX=9606 GN=ACIN1 PE=1 SV=2	8	1.63683e-05	1.32857e-05	0.0394969	0.0286687	1.23202	0.301021
DBT	P11182	sp|P11182|ODB2_HUMAN Lipoamide acyltransferase component of branched-chain alpha-keto acid dehydrogenase complex, mitochondrial OS=Homo sapiens OX=9606 GN=DBT PE=1 SV=3	4	1.58511e-06	1.44909e-05	0.0124448	0.0124114	0.109386	-3.1925
SLC3A1	Q07837	sp|Q07837|SLC31_HUMAN Neutral and basic amino acid transport protein rBAT OS=Homo sapiens OX=9606 GN=SLC3A1 PE=1 SV=2	5	1.43734e-05	1.90642e-05	0.00327527	0.00515718	0.753945	-0.407469
NUP160	Q12769	sp|Q12769|NU160_HUMAN Nuclear pore complex protein Nup160 OS=Homo sapiens OX=9606 GN=NUP160 PE=1 SV=3	8	1.88777e-05	1.36354e-05	0.00195227	0.00366794	1.38447	0.469329
AKAP1	Q92667	sp|Q92667|AKAP1_HUMAN A-kinase anchor protein 1, mitochondrial OS=Homo sapiens OX=9606 GN=AKAP1 PE=1 SV=1	5	1.47033e-05	2.03067e-05	0.00610882	0.00765844	0.724062	-0.465814
MRPS34	P82930	sp|P82930|RT34_HUMAN 28S ribosomal protein S34, mitochondrial OS=Homo sapiens OX=9606 GN=MRPS34 PE=1 SV=2	3	9.71495e-06	1.57222e-05	7.39403e-05	0.000581051	0.617911	-0.694528
DDAH2	O95865	sp|O95865|DDAH2_HUMAN N(G),N(G)-dimethylarginine dimethylaminohydrolase 2 OS=Homo sapiens OX=9606 GN=DDAH2 PE=1 SV=1	3	2.01502e-05	1.54937e-05	0.0177301	0.015937	1.30055	0.379117
GUCY2C	P25092	sp|P25092|GUC2C_HUMAN Heat-stable enterotoxin receptor OS=Homo sapiens OX=9606 GN=GUCY2C PE=1 SV=2	7	9.57238e-06	2.04597e-05	0.0119017	0.0120569	0.467865	-1.09584
OSBP	P22059	sp|P22059|OSBP1_HUMAN Oxysterol-binding protein 1 OS=Homo sapiens OX=9606 GN=OSBP PE=1 SV=1	8	1.64042e-05	1.24482e-05	0.010792	0.0112967	1.3178	0.398135
EXOSC7	Q15024	sp|Q15024|EXOS7_HUMAN Exosome complex component RRP42 OS=Homo sapiens OX=9606 GN=EXOSC7 PE=1 SV=3	2	3.48944e-05	7.03334e-06	0.00923456	0.0101622	4.96128	2.31071
ATP9A	O75110	sp|O75110|ATP9A_HUMAN Probable phospholipid-transporting ATPase IIA OS=Homo sapiens OX=9606 GN=ATP9A PE=1 SV=3	4	1.27706e-05	1.74629e-05	0.0279785	0.0222308	0.731297	-0.451471
TTR	P02766	sp|P02766|TTHY_HUMAN Transthyretin OS=Homo sapiens OX=9606 GN=TTR PE=1 SV=1	1	2.63177e-06	2.52238e-05	0.00132027	0.00288977	0.104337	-3.26068
APOA2	P02652	sp|P02652|APOA2_HUMAN Apolipoprotein A-II OS=Homo sapiens OX=9606 GN=APOA2 PE=1 SV=1	1	2.20344e-08	5.00558e-05	0.0118756	0.0120396	0.000440197	-11.1496
IPO5	O00410	sp|O00410|IPO5_HUMAN Importin-5 OS=Homo sapiens OX=9606 GN=IPO5 PE=1 SV=4	7	1.54473e-05	1.12364e-05	0.00806023	0.00925019	1.37475	0.459169
SYT7	O43581	sp|O43581|SYT7_HUMAN Synaptotagmin-7 OS=Homo sapiens OX=9606 GN=SYT7 PE=1 SV=3	2	1.00901e-05	1.78192e-05	0.00408155	0.00595864	0.566246	-0.8205
MFSD10	Q14728	sp|Q14728|MFS10_HUMAN Major facilitator superfamily domain-containing protein 10 OS=Homo sapiens OX=9606 GN=MFSD10 PE=1 SV=1	2	2.03677e-05	8.54536e-06	0.0182321	0.0162368	2.38348	1.25307
IMPAD1	Q9NX62	sp|Q9NX62|IMPA3_HUMAN Inositol monophosphatase 3 OS=Homo sapiens OX=9606 GN=IMPAD1 PE=1 SV=1	2	5.66991e-06	2.11166e-05	0.0153953	0.014466	0.268505	-1.89698
WDR43	Q15061	sp|Q15061|WDR43_HUMAN WD repeat-containing protein 43 OS=Homo sapiens OX=9606 GN=WDR43 PE=1 SV=3	3	1.12849e-05	1.69259e-05	0.0276337	0.0220236	0.666727	-0.584832
MRPS18A	Q9NVS2	sp|Q9NVS2|RT18A_HUMAN 39S ribosomal protein S18a, mitochondrial OS=Homo sapiens OX=9606 GN=MRPS18A PE=1 SV=1	2	1.14875e-05	1.8898e-05	0.00463217	0.00644207	0.607865	-0.718178
FKBP10	Q96AY3	sp|Q96AY3|FKB10_HUMAN Peptidyl-prolyl cis-trans isomerase FKBP10 OS=Homo sapiens OX=9606 GN=FKBP10 PE=1 SV=1	5	7.26356e-06	2.01277e-05	0.00700607	0.00839879	0.360874	-1.47043
PYGB	P11216	sp|P11216|PYGB_HUMAN Glycogen phosphorylase, brain form OS=Homo sapiens OX=9606 GN=PYGB PE=1 SV=5	6	1.61583e-05	7.84642e-06	0.0308584	0.0239127	2.05932	1.04217
DTYMK	P23919	sp|P23919|KTHY_HUMAN Thymidylate kinase OS=Homo sapiens OX=9606 GN=DTYMK PE=1 SV=4	3	1.80316e-05	1.10682e-05	0.000335762	0.00130158	1.62914	0.704113
CAPN2	P17655	sp|P17655|CAN2_HUMAN Calpain-2 catalytic subunit OS=Homo sapiens OX=9606 GN=CAPN2 PE=1 SV=6	7	1.76211e-05	1.32179e-05	0.0235242	0.019556	1.33312	0.414812
CTSH	P09668	sp|P09668|CATH_HUMAN Pro-cathepsin H OS=Homo sapiens OX=9606 GN=CTSH PE=1 SV=4	3	2.94575e-06	2.1962e-05	0.000278162	0.00117951	0.13413	-2.8983
TACO1	Q9BSH4	sp|Q9BSH4|TACO1_HUMAN Translational activator of cytochrome c oxidase 1 OS=Homo sapiens OX=9606 GN=TACO1 PE=1 SV=1	3	1.79012e-05	9.34062e-06	0.023151	0.0193235	1.91649	0.938463
PEX16	Q9Y5Y5	sp|Q9Y5Y5|PEX16_HUMAN Peroxisomal membrane protein PEX16 OS=Homo sapiens OX=9606 GN=PEX16 PE=1 SV=2	2	7.96493e-06	1.24297e-05	0.0350205	0.0262447	0.6408	-0.642054
APOM	O95445	sp|O95445|APOM_HUMAN Apolipoprotein M OS=Homo sapiens OX=9606 GN=APOM PE=1 SV=2	2	3.69152e-06	2.19654e-05	1.49579e-05	0.00028449	0.168061	-2.57294
HEBP2	Q9Y5Z4	sp|Q9Y5Z4|HEBP2_HUMAN Heme-binding protein 2 OS=Homo sapiens OX=9606 GN=HEBP2 PE=1 SV=1	2	1.38221e-05	1.09836e-05	0.00681044	0.00824295	1.25842	0.331619
CHMP6	Q96FZ7	sp|Q96FZ7|CHMP6_HUMAN Charged multivesicular body protein 6 OS=Homo sapiens OX=9606 GN=CHMP6 PE=1 SV=3	2	2.49917e-05	2.27861e-06	0.00171861	0.00339026	10.968	3.45523
AMHR2	Q16671	sp|Q16671|AMHR2_HUMAN Anti-Muellerian hormone type-2 receptor OS=Homo sapiens OX=9606 GN=AMHR2 PE=1 SV=1	1	3.04851e-05	5.65591e-06	4.89666e-05	0.000492804	5.38995	2.43027
RAI14	Q9P0K7	sp|Q9P0K7|RAI14_HUMAN Ankycorbin OS=Homo sapiens OX=9606 GN=RAI14 PE=1 SV=2	3	1.45949e-05	7.91537e-06	0.0423445	0.030133	1.84386	0.88273
AGT	P01019	sp|P01019|ANGT_HUMAN Angiotensinogen OS=Homo sapiens OX=9606 GN=AGT PE=1 SV=1	4	2.20344e-08	2.22214e-05	0.0119655	0.0120992	0.000991586	-9.97797
UGT2A1	Q9Y4X1	sp|Q9Y4X1|UD2A1_HUMAN UDP-glucuronosyltransferase 2A1 OS=Homo sapiens OX=9606 GN=UGT2A1 PE=1 SV=2	1	8.01506e-06	1.62813e-05	0.00266107	0.00448819	0.492286	-1.02243
LCT	P09848	sp|P09848|LPH_HUMAN Lactase-phlorizin hydrolase OS=Homo sapiens OX=9606 GN=LCT PE=1 SV=3	12	8.90973e-06	1.64216e-05	0.00767873	0.00893887	0.542562	-0.882141
AGPAT5	Q9NUQ2	sp|Q9NUQ2|PLCE_HUMAN 1-acyl-sn-glycerol-3-phosphate acyltransferase epsilon OS=Homo sapiens OX=9606 GN=AGPAT5 PE=1 SV=3	3	1.69559e-05	1.0511e-05	0.00272192	0.00455085	1.61316	0.689886
MLF2	Q15773	sp|Q15773|MLF2_HUMAN Myeloid leukemia factor 2 OS=Homo sapiens OX=9606 GN=MLF2 PE=1 SV=1	2	6.28535e-06	1.41742e-05	0.0409361	0.029416	0.443437	-1.1732
DPEP1	P16444	sp|P16444|DPEP1_HUMAN Dipeptidase 1 OS=Homo sapiens OX=9606 GN=DPEP1 PE=1 SV=3	3	2.07626e-05	8.90059e-06	0.00692936	0.00833803	2.33272	1.22201
PRPF3	O43395	sp|O43395|PRPF3_HUMAN U4/U6 small nuclear ribonucleoprotein Prp3 OS=Homo sapiens OX=9606 GN=PRPF3 PE=1 SV=2	2	2.25292e-05	6.11588e-06	0.00722255	0.00856781	3.68372	1.88117
PDCD4	Q53EL6	sp|Q53EL6|PDCD4_HUMAN Programmed cell death protein 4 OS=Homo sapiens OX=9606 GN=PDCD4 PE=1 SV=2	5	4.7252e-06	1.99659e-05	0.000125921	0.000781344	0.236664	-2.07909
CAD	P27708	sp|P27708|PYR1_HUMAN CAD protein OS=Homo sapiens OX=9606 GN=CAD PE=1 SV=3	10	1.47324e-05	1.12286e-05	0.0121939	0.012249	1.31204	0.39181
ATPAF2	Q8N5M1	sp|Q8N5M1|ATPF2_HUMAN ATP synthase mitochondrial F1 complex assembly factor 2 OS=Homo sapiens OX=9606 GN=ATPAF2 PE=1 SV=1	2	8.63089e-06	1.80859e-05	0.000646681	0.00185557	0.477216	-1.06729
PRPF4B	Q13523	sp|Q13523|PRP4B_HUMAN Serine/threonine-protein kinase PRP4 homolog OS=Homo sapiens OX=9606 GN=PRPF4B PE=1 SV=3	4	1.6682e-05	9.37612e-06	0.00641989	0.00792267	1.7792	0.831232
SLC35E1	Q96K37	sp|Q96K37|S35E1_HUMAN Solute carrier family 35 member E1 OS=Homo sapiens OX=9606 GN=SLC35E1 PE=1 SV=2	2	1.06438e-05	4.20732e-06	0.0441911	0.031071	2.52982	1.33904
PPP1CA	P62136	sp|P62136|PP1A_HUMAN Serine/threonine-protein phosphatase PP1-alpha catalytic subunit OS=Homo sapiens OX=9606 GN=PPP1CA PE=1 SV=1	2	1.67964e-05	9.17955e-06	0.000470677	0.00156736	1.82977	0.871659
USP10	Q14694	sp|Q14694|UBP10_HUMAN Ubiquitin carboxyl-terminal hydrolase 10 OS=Homo sapiens OX=9606 GN=USP10 PE=1 SV=2	5	7.77421e-06	4.63643e-06	0.0172255	0.01563	1.67677	0.745681
STX6	O43752	sp|O43752|STX6_HUMAN Syntaxin-6 OS=Homo sapiens OX=9606 GN=STX6 PE=1 SV=1	4	2.2735e-06	2.01877e-05	0.00593177	0.00750553	0.112618	-3.15049
ARMCX3	Q9UH62	sp|Q9UH62|ARMX3_HUMAN Armadillo repeat-containing X-linked protein 3 OS=Homo sapiens OX=9606 GN=ARMCX3 PE=1 SV=1	4	8.77078e-06	1.43363e-05	0.0172992	0.0156752	0.611787	-0.708899
NARS2	Q96I59	sp|Q96I59|SYNM_HUMAN Probable asparagine--tRNA ligase, mitochondrial OS=Homo sapiens OX=9606 GN=NARS2 PE=1 SV=3	2	8.15251e-06	1.57938e-05	5.79907e-05	0.000529882	0.516184	-0.954043
GALNT6	Q8NCL4	sp|Q8NCL4|GALT6_HUMAN Polypeptide N-acetylgalactosaminyltransferase 6 OS=Homo sapiens OX=9606 GN=GALNT6 PE=2 SV=2	4	9.14512e-06	1.71415e-05	0.00398258	0.0058666	0.533509	-0.906415
SMPDL3B	Q92485	sp|Q92485|ASM3B_HUMAN Acid sphingomyelinase-like phosphodiesterase 3b OS=Homo sapiens OX=9606 GN=SMPDL3B PE=1 SV=2	1	9.67684e-06	1.77959e-05	0.0146244	0.0139506	0.543767	-0.87894
RTN3	O95197	sp|O95197|RTN3_HUMAN Reticulon-3 OS=Homo sapiens OX=9606 GN=RTN3 PE=1 SV=2	1	9.73839e-06	7.20401e-06	0.00556487	0.00718329	1.3518	0.434884
ZW10	O43264	sp|O43264|ZW10_HUMAN Centromere/kinetochore protein zw10 homolog OS=Homo sapiens OX=9606 GN=ZW10 PE=1 SV=3	5	1.89757e-05	2.30143e-06	0.00782703	0.00906095	8.24515	3.04355
MGLL	Q99685	sp|Q99685|MGLL_HUMAN Monoglyceride lipase OS=Homo sapiens OX=9606 GN=MGLL PE=1 SV=2	2	1.80483e-05	9.63167e-06	0.00208013	0.00382946	1.87385	0.906005
PLA2G12B	Q9BX93	sp|Q9BX93|PG12B_HUMAN Group XIIB secretory phospholipase A2-like protein OS=Homo sapiens OX=9606 GN=PLA2G12B PE=1 SV=2	2	2.89346e-05	4.79303e-06	0.0150415	0.0142314	6.0368	2.59378
NUP58	Q9BVL2	sp|Q9BVL2|NUP58_HUMAN Nucleoporin p58/p45 OS=Homo sapiens OX=9606 GN=NUP58 PE=1 SV=1	2	1.37187e-05	1.94276e-05	0.0100476	0.0107577	0.706146	-0.501962
SDCBP	O00560	sp|O00560|SDCB1_HUMAN Syntenin-1 OS=Homo sapiens OX=9606 GN=SDCBP PE=1 SV=1	3	6.04833e-06	2.02829e-05	0.0185434	0.0164199	0.298198	-1.74566
GTPBP6	O43824	sp|O43824|GTPB6_HUMAN Putative GTP-binding protein 6 OS=Homo sapiens OX=9606 GN=GTPBP6 PE=2 SV=4	4	4.71867e-06	1.75258e-05	0.0107268	0.0112504	0.269241	-1.89303
CALML4	Q96GE6	sp|Q96GE6|CALL4_HUMAN Calmodulin-like protein 4 OS=Homo sapiens OX=9606 GN=CALML4 PE=2 SV=3	1	9.11186e-06	1.54625e-05	0.011783	0.011978	0.589289	-0.762952
RCOR1	Q9UKL0	sp|Q9UKL0|RCOR1_HUMAN REST corepressor 1 OS=Homo sapiens OX=9606 GN=RCOR1 PE=1 SV=2	4	9.01623e-06	1.55363e-05	0.000272551	0.00116826	0.580332	-0.78505
MYO1E	Q12965	sp|Q12965|MYO1E_HUMAN Unconventional myosin-Ie OS=Homo sapiens OX=9606 GN=MYO1E PE=1 SV=2;sp|O00160|MYO1F_HUMAN Unconventional myosin-If OS=Homo sapiens OX=9606 GN=MYO1F PE=1 SV=3	6	8.58281e-06	1.35529e-05	0.00122063	0.00275596	0.633282	-0.659081
OS9	Q13438	sp|Q13438|OS9_HUMAN Protein OS-9 OS=Homo sapiens OX=9606 GN=OS9 PE=1 SV=1	5	3.11607e-06	1.57027e-05	0.000629681	0.00183048	0.198441	-2.33322
PLOD1	Q02809	sp|Q02809|PLOD1_HUMAN Procollagen-lysine,2-oxoglutarate 5-dioxygenase 1 OS=Homo sapiens OX=9606 GN=PLOD1 PE=1 SV=2	5	5.71053e-06	1.90678e-05	0.000526071	0.00166407	0.299486	-1.73944
ITGB6	P18564	sp|P18564|ITB6_HUMAN Integrin beta-6 OS=Homo sapiens OX=9606 GN=ITGB6 PE=1 SV=2	1	1.68867e-05	2.07889e-05	0.0331652	0.0252012	0.812292	-0.29993
ZC3H18	Q86VM9	sp|Q86VM9|ZCH18_HUMAN Zinc finger CCCH domain-containing protein 18 OS=Homo sapiens OX=9606 GN=ZC3H18 PE=1 SV=2	5	8.57593e-06	1.37477e-05	0.0365993	0.0271174	0.623809	-0.680824
MOB1A	Q9H8S9	sp|Q9H8S9|MOB1A_HUMAN MOB kinase activator 1A OS=Homo sapiens OX=9606 GN=MOB1A PE=1 SV=4;sp|Q7L9L4|MOB1B_HUMAN MOB kinase activator 1B OS=Homo sapiens OX=9606 GN=MOB1B PE=1 SV=3	1	1.30028e-05	9.55605e-06	0.0176495	0.0158884	1.36069	0.444339
ALG3	Q92685	sp|Q92685|ALG3_HUMAN Dol-P-Man:Man(5)GlcNAc(2)-PP-Dol alpha-1,3-mannosyltransferase OS=Homo sapiens OX=9606 GN=ALG3 PE=1 SV=1	2	1.00507e-05	1.45196e-05	0.00496104	0.00670955	0.692212	-0.530714
NEDD8	Q15843	sp|Q15843|NEDD8_HUMAN NEDD8 OS=Homo sapiens OX=9606 GN=NEDD8 PE=1 SV=1	1	2.9359e-05	3.69977e-06	0.0121219	0.012202	7.93536	2.9883
SAFB2	Q14151	sp|Q14151|SAFB2_HUMAN Scaffold attachment factor B2 OS=Homo sapiens OX=9606 GN=SAFB2 PE=1 SV=1	5	1.52034e-05	9.26175e-06	0.00825544	0.0094061	1.64153	0.715038
LCLAT1	Q6UWP7	sp|Q6UWP7|LCLT1_HUMAN Lysocardiolipin acyltransferase 1 OS=Homo sapiens OX=9606 GN=LCLAT1 PE=1 SV=1	3	1.54107e-05	8.53488e-06	0.043909	0.0309281	1.80562	0.852494
SYMPK	Q92797	sp|Q92797|SYMPK_HUMAN Symplekin OS=Homo sapiens OX=9606 GN=SYMPK PE=1 SV=2	5	8.761e-06	1.52898e-05	0.000130591	0.000796504	0.572996	-0.803403
GOLGA2	Q08379	sp|Q08379|GOGA2_HUMAN Golgin subfamily A member 2 OS=Homo sapiens OX=9606 GN=GOLGA2 PE=1 SV=3	5	9.84809e-06	1.35404e-05	0.0090954	0.0100572	0.727311	-0.459357
MAFF	Q9ULX9	sp|Q9ULX9|MAFF_HUMAN Transcription factor MafF OS=Homo sapiens OX=9606 GN=MAFF PE=1 SV=2;sp|O60675|MAFK_HUMAN Transcription factor MafK OS=Homo sapiens OX=9606 GN=MAFK PE=1 SV=1;sp|O15525|MAFG_HUMAN Transcription factor MafG OS=Homo sapiens OX=9606 GN=MAFG	2	2.09585e-05	3.64737e-06	0.00609032	0.00764246	5.74619	2.52261
NDUFAF1	Q9Y375	sp|Q9Y375|CIA30_HUMAN Complex I intermediate-associated protein 30, mitochondrial OS=Homo sapiens OX=9606 GN=NDUFAF1 PE=1 SV=2	2	9.72182e-06	1.21879e-05	0.00271133	0.00454002	0.797662	-0.32615
MTREX	P42285	sp|P42285|MTREX_HUMAN Exosome RNA helicase MTR4 OS=Homo sapiens OX=9606 GN=MTREX PE=1 SV=3	6	8.6482e-06	1.123e-05	0.0495675	0.0338771	0.770101	-0.376881
PLBD2	Q8NHP8	sp|Q8NHP8|PLBL2_HUMAN Putative phospholipase B-like 2 OS=Homo sapiens OX=9606 GN=PLBD2 PE=1 SV=2	2	8.64408e-06	1.30627e-05	0.000359507	0.00135169	0.661738	-0.595669
MPG	P29372	sp|P29372|3MG_HUMAN DNA-3-methyladenine glycosylase OS=Homo sapiens OX=9606 GN=MPG PE=1 SV=3	2	6.2648e-07	1.8179e-05	0.00279785	0.00462754	0.0344618	-4.85886
DGLUCY	Q7Z3D6	sp|Q7Z3D6|GLUCM_HUMAN D-glutamate cyclase, mitochondrial OS=Homo sapiens OX=9606 GN=DGLUCY PE=1 SV=2	4	7.4735e-06	1.36706e-05	0.00268444	0.00451239	0.546683	-0.871223
DAZAP1	Q96EP5	sp|Q96EP5|DAZP1_HUMAN DAZ-associated protein 1 OS=Homo sapiens OX=9606 GN=DAZAP1 PE=1 SV=1	2	2.10012e-05	5.36262e-06	0.00209737	0.00385073	3.91623	1.96946
GMPS	P49915	sp|P49915|GUAA_HUMAN GMP synthase [glutamine-hydrolyzing] OS=Homo sapiens OX=9606 GN=GMPS PE=1 SV=1	3	1.30138e-05	9.55209e-06	0.0309978	0.023992	1.3624	0.446155
GHDC	Q8N2G8	sp|Q8N2G8|GHDC_HUMAN GH3 domain-containing protein OS=Homo sapiens OX=9606 GN=GHDC PE=1 SV=2	6	1.75036e-05	3.95717e-06	0.00447255	0.00630671	4.42326	2.14511
ECM1	Q16610	sp|Q16610|ECM1_HUMAN Extracellular matrix protein 1 OS=Homo sapiens OX=9606 GN=ECM1 PE=1 SV=2	2	3.66378e-07	6.48887e-06	7.44528e-05	0.000582459	0.0564625	-4.14656
TMCC1	O94876	sp|O94876|TMCC1_HUMAN Transmembrane and coiled-coil domains protein 1 OS=Homo sapiens OX=9606 GN=TMCC1 PE=1 SV=3	2	9.70723e-06	1.3474e-05	0.00060488	0.00179267	0.720442	-0.473045
GLYR1	Q49A26	sp|Q49A26|GLYR1_HUMAN Putative oxidoreductase GLYR1 OS=Homo sapiens OX=9606 GN=GLYR1 PE=1 SV=4	3	6.8414e-06	1.04696e-05	0.0370595	0.0273681	0.653457	-0.613836
SH3TC1	Q8TE82	sp|Q8TE82|S3TC1_HUMAN SH3 domain and tetratricopeptide repeat-containing protein 1 OS=Homo sapiens OX=9606 GN=SH3TC1 PE=1 SV=3	3	1.24874e-05	6.87025e-06	0.0116744	0.0119052	1.81761	0.862044
MAPK13	O15264	sp|O15264|MK13_HUMAN Mitogen-activated protein kinase 13 OS=Homo sapiens OX=9606 GN=MAPK13 PE=1 SV=1	3	1.29213e-05	7.63312e-06	0.0175727	0.0158419	1.69279	0.759403
EXOSC6	Q5RKV6	sp|Q5RKV6|EXOS6_HUMAN Exosome complex component MTR3 OS=Homo sapiens OX=9606 GN=EXOSC6 PE=1 SV=1	1	1.78308e-05	3.06008e-08	0.000409353	0.00144766	582.69	9.18659
C7orf50	Q9BRJ6	sp|Q9BRJ6|CG050_HUMAN Uncharacterized protein C7orf50 OS=Homo sapiens OX=9606 GN=C7orf50 PE=1 SV=1	1	1.26843e-05	8.01766e-06	0.00142929	0.00303606	1.58204	0.661788
CNN2	Q99439	sp|Q99439|CNN2_HUMAN Calponin-2 OS=Homo sapiens OX=9606 GN=CNN2 PE=1 SV=4	2	1.63e-06	9.59559e-06	0.00075322	0.00201588	0.169869	-2.5575
ACE2	Q9BYF1	sp|Q9BYF1|ACE2_HUMAN Angiotensin-converting enzyme 2 OS=Homo sapiens OX=9606 GN=ACE2 PE=1 SV=2	3	8.36029e-06	1.27604e-05	0.00320456	0.00508084	0.655176	-0.610045
MSH2	P43246	sp|P43246|MSH2_HUMAN DNA mismatch repair protein Msh2 OS=Homo sapiens OX=9606 GN=MSH2 PE=1 SV=1	7	1.52005e-05	9.87182e-06	0.00455904	0.00638051	1.53979	0.622735
SDCBP2	Q9H190	sp|Q9H190|SDCB2_HUMAN Syntenin-2 OS=Homo sapiens OX=9606 GN=SDCBP2 PE=1 SV=2	1	1.60906e-05	3.06008e-08	0.00685699	0.0082803	525.821	9.03843
HAGH	Q16775	sp|Q16775|GLO2_HUMAN Hydroxyacylglutathione hydrolase, mitochondrial OS=Homo sapiens OX=9606 GN=HAGH PE=1 SV=2	2	1.00485e-05	1.35325e-05	0.00370197	0.00559639	0.742544	-0.429452
COL18A1	P39060	sp|P39060|COIA1_HUMAN Collagen alpha-1(XVIII) chain OS=Homo sapiens OX=9606 GN=COL18A1 PE=1 SV=5	5	8.60995e-06	1.15517e-05	0.00421375	0.00607904	0.745343	-0.424023
RAB6D	Q53S08	sp|Q53S08|RAB6D_HUMAN Ras-related protein Rab-6D OS=Homo sapiens OX=9606 GN=RAB6D PE=2 SV=1;sp|Q9H0N0|RAB6C_HUMAN Ras-related protein Rab-6C OS=Homo sapiens OX=9606 GN=RAB6C PE=1 SV=2	1	2.20344e-08	3.06008e-08	0.00542946	0.00706608	0.72006	-0.473812
DDX54	Q8TDD1	sp|Q8TDD1|DDX54_HUMAN ATP-dependent RNA helicase DDX54 OS=Homo sapiens OX=9606 GN=DDX54 PE=1 SV=2	9	9.66651e-06	6.98577e-06	0.0440358	0.0309924	1.38374	0.468575
BAIAP2	Q9UQB8	sp|Q9UQB8|BAIP2_HUMAN Brain-specific angiogenesis inhibitor 1-associated protein 2 OS=Homo sapiens OX=9606 GN=BAIAP2 PE=1 SV=1	5	7.20477e-06	1.06951e-05	0.00495058	0.00670127	0.673651	-0.569926
SERBP1	Q8NC51	sp|Q8NC51|PAIRB_HUMAN Plasminogen activator inhibitor 1 RNA-binding protein OS=Homo sapiens OX=9606 GN=SERBP1 PE=1 SV=2	3	1.55399e-06	1.45998e-05	0.0453091	0.0316449	0.10644	-3.23189
PTPRJ	Q12913	sp|Q12913|PTPRJ_HUMAN Receptor-type tyrosine-protein phosphatase eta OS=Homo sapiens OX=9606 GN=PTPRJ PE=1 SV=3	7	8.27333e-06	1.21474e-05	0.0243821	0.0200833	0.681081	-0.554102
HLA-G	P17693	sp|P17693|HLAG_HUMAN HLA class I histocompatibility antigen, alpha chain G OS=Homo sapiens OX=9606 GN=HLA-G PE=1 SV=1	1	2.20344e-08	1.75389e-05	0.00133695	0.00291151	0.00125632	-9.63658
CPNE8	Q86YQ8	sp|Q86YQ8|CPNE8_HUMAN Copine-8 OS=Homo sapiens OX=9606 GN=CPNE8 PE=1 SV=2;sp|Q8IYJ1|CPNE9_HUMAN Copine-9 OS=Homo sapiens OX=9606 GN=CPNE9 PE=1 SV=3;sp|Q9HCH3|CPNE5_HUMAN Copine-5 OS=Homo sapiens OX=9606 GN=CPNE5 PE=1 SV=2	3	3.04307e-06	1.08445e-05	0.0381816	0.0279725	0.28061	-1.83336
NMNAT1	Q9HAN9	sp|Q9HAN9|NMNA1_HUMAN Nicotinamide/nicotinic acid mononucleotide adenylyltransferase 1 OS=Homo sapiens OX=9606 GN=NMNAT1 PE=1 SV=1	2	1.60551e-05	6.09371e-06	0.0278525	0.0221552	2.6347	1.39764
PES1	O00541	sp|O00541|PESC_HUMAN Pescadillo homolog OS=Homo sapiens OX=9606 GN=PES1 PE=1 SV=1	6	1.10356e-05	7.79184e-06	0.0105891	0.0111521	1.4163	0.502124
LMF2	Q9BU23	sp|Q9BU23|LMF2_HUMAN Lipase maturation factor 2 OS=Homo sapiens OX=9606 GN=LMF2 PE=1 SV=2	3	5.73168e-06	1.60623e-05	0.0296722	0.0232301	0.356841	-1.48665
DNAJC2	Q99543	sp|Q99543|DNJC2_HUMAN DnaJ homolog subfamily C member 2 OS=Homo sapiens OX=9606 GN=DNAJC2 PE=1 SV=4	2	1.19587e-05	3.83284e-06	0.0357476	0.0266491	3.12006	1.64157
TOMM40L	Q969M1	sp|Q969M1|TM40L_HUMAN Mitochondrial import receptor subunit TOM40B OS=Homo sapiens OX=9606 GN=TOMM40L PE=1 SV=1	1	6.85322e-06	1.39213e-05	0.00367038	0.00556508	0.492284	-1.02244
ANKS4B	Q8N8V4	sp|Q8N8V4|ANS4B_HUMAN Ankyrin repeat and SAM domain-containing protein 4B OS=Homo sapiens OX=9606 GN=ANKS4B PE=1 SV=2	2	1.05324e-05	4.23711e-06	0.000274561	0.00117232	2.48576	1.31369
MRGBP	Q9NV56	sp|Q9NV56|MRGBP_HUMAN MRG/MORF4L-binding protein OS=Homo sapiens OX=9606 GN=MRGBP PE=1 SV=1	1	1.71377e-05	4.48788e-06	0.00814134	0.00931525	3.81867	1.93307
BAIAP2L1	Q9UHR4	sp|Q9UHR4|BI2L1_HUMAN Brain-specific angiogenesis inhibitor 1-associated protein 2-like protein 1 OS=Homo sapiens OX=9606 GN=BAIAP2L1 PE=1 SV=2	4	1.17682e-05	9.08389e-06	0.0105413	0.0111179	1.29551	0.373515
PLOD3	O60568	sp|O60568|PLOD3_HUMAN Procollagen-lysine,2-oxoglutarate 5-dioxygenase 3 OS=Homo sapiens OX=9606 GN=PLOD3 PE=1 SV=1	5	7.94973e-06	1.21594e-05	0.000767107	0.00203776	0.653793	-0.613094
CROCC	Q5TZA2	sp|Q5TZA2|CROCC_HUMAN Rootletin OS=Homo sapiens OX=9606 GN=CROCC PE=1 SV=1	2	1.19325e-05	7.67527e-06	0.0187723	0.0165533	1.55467	0.636607
MPRIP	Q6WCQ1	sp|Q6WCQ1|MPRIP_HUMAN Myosin phosphatase Rho-interacting protein OS=Homo sapiens OX=9606 GN=MPRIP PE=1 SV=3	7	1.30814e-05	5.8198e-06	6.95361e-05	0.000568411	2.24774	1.16847
MGAT1	P26572	sp|P26572|MGAT1_HUMAN Alpha-1,3-mannosyl-glycoprotein 2-beta-N-acetylglucosaminyltransferase OS=Homo sapiens OX=9606 GN=MGAT1 PE=1 SV=2	2	5.62972e-06	1.4409e-05	7.20483e-06	0.000217379	0.39071	-1.35583
AGRN	O00468	sp|O00468|AGRIN_HUMAN Agrin OS=Homo sapiens OX=9606 GN=AGRN PE=1 SV=6	11	7.12077e-06	1.19422e-05	0.000251168	0.00112304	0.596271	-0.745959
TMEM56	Q96MV1	sp|Q96MV1|TMM56_HUMAN Transmembrane protein 56 OS=Homo sapiens OX=9606 GN=TMEM56 PE=1 SV=1	2	1.03629e-05	8.47086e-06	0.00721507	0.00856203	1.22336	0.29085
STX18	Q9P2W9	sp|Q9P2W9|STX18_HUMAN Syntaxin-18 OS=Homo sapiens OX=9606 GN=STX18 PE=1 SV=1	3	1.15553e-05	5.94305e-06	0.000726011	0.00197269	1.94433	0.959276
SLC25A40	Q8TBP6	sp|Q8TBP6|S2540_HUMAN Solute carrier family 25 member 40 OS=Homo sapiens OX=9606 GN=SLC25A40 PE=1 SV=1	2	4.65731e-06	2.05432e-05	6.18892e-05	0.000543868	0.226708	-2.14109
RAB11FIP1	Q6WKZ4	sp|Q6WKZ4|RFIP1_HUMAN Rab11 family-interacting protein 1 OS=Homo sapiens OX=9606 GN=RAB11FIP1 PE=1 SV=3	3	4.76775e-06	1.08117e-05	0.00181737	0.00350033	0.440979	-1.18122
RPP30	P78346	sp|P78346|RPP30_HUMAN Ribonuclease P protein subunit p30 OS=Homo sapiens OX=9606 GN=RPP30 PE=1 SV=1	1	1.02211e-05	7.34931e-06	0.00514127	0.00684999	1.39075	0.475865
YME1L1	Q96TA2	sp|Q96TA2|YMEL1_HUMAN ATP-dependent zinc metalloprotease YME1L1 OS=Homo sapiens OX=9606 GN=YME1L1 PE=1 SV=2	4	3.92471e-06	1.42681e-05	0.0342875	0.0258327	0.275069	-1.86213
ANO10	Q9NW15	sp|Q9NW15|ANO10_HUMAN Anoctamin-10 OS=Homo sapiens OX=9606 GN=ANO10 PE=1 SV=2	3	1.16396e-05	7.48959e-06	0.00369472	0.00558922	1.5541	0.636077
COQ6	Q9Y2Z9	sp|Q9Y2Z9|COQ6_HUMAN Ubiquinone biosynthesis monooxygenase COQ6, mitochondrial OS=Homo sapiens OX=9606 GN=COQ6 PE=1 SV=2	3	3.24835e-06	9.94732e-06	0.0224528	0.0188835	0.326556	-1.6146
MXRA7	P84157	sp|P84157|MXRA7_HUMAN Matrix-remodeling-associated protein 7 OS=Homo sapiens OX=9606 GN=MXRA7 PE=1 SV=1	2	2.20344e-08	1.6302e-05	0.0224226	0.0188643	0.00135164	-9.53108
UGT8	Q16880	sp|Q16880|CGT_HUMAN 2-hydroxyacylsphingosine 1-beta-galactosyltransferase OS=Homo sapiens OX=9606 GN=UGT8 PE=2 SV=2	3	3.64047e-06	1.30429e-05	0.00136716	0.00295287	0.279115	-1.84107
AP3D1	O14617	sp|O14617|AP3D1_HUMAN AP-3 complex subunit delta-1 OS=Homo sapiens OX=9606 GN=AP3D1 PE=1 SV=1	4	1.31558e-05	6.50631e-06	1.8007e-05	0.000310976	2.02201	1.01579
PLD3	Q8IV08	sp|Q8IV08|PLD3_HUMAN Phospholipase D3 OS=Homo sapiens OX=9606 GN=PLD3 PE=1 SV=1	2	4.0201e-06	1.26289e-05	0.00034785	0.00132747	0.318325	-1.65143
PSMD4	P55036	sp|P55036|PSMD4_HUMAN 26S proteasome non-ATPase regulatory subunit 4 OS=Homo sapiens OX=9606 GN=PSMD4 PE=1 SV=1;sp|A2A3N6|PIPSL_HUMAN Putative PIP5K1A and PSMD4-like protein OS=Homo sapiens OX=9606 GN=PIPSL PE=5 SV=1	2	7.19301e-06	1.0386e-05	0.0203858	0.0175472	0.692566	-0.529977
WBP11	Q9Y2W2	sp|Q9Y2W2|WBP11_HUMAN WW domain-binding protein 11 OS=Homo sapiens OX=9606 GN=WBP11 PE=1 SV=1	3	1.36891e-05	7.11042e-06	0.000659291	0.00187376	1.92522	0.945021
RRP8	O43159	sp|O43159|RRP8_HUMAN Ribosomal RNA-processing protein 8 OS=Homo sapiens OX=9606 GN=RRP8 PE=1 SV=2	3	1.33914e-05	6.98836e-06	0.00466559	0.00646994	1.91624	0.938276
ATP6AP1	Q15904	sp|Q15904|VAS1_HUMAN V-type proton ATPase subunit S1 OS=Homo sapiens OX=9606 GN=ATP6AP1 PE=1 SV=2	2	4.96721e-06	7.9722e-06	0.00348648	0.00537905	0.623067	-0.682542
KPNA2	P52292	sp|P52292|IMA1_HUMAN Importin subunit alpha-1 OS=Homo sapiens OX=9606 GN=KPNA2 PE=1 SV=1	5	5.80015e-06	7.66131e-06	0.0324354	0.024799	0.75707	-0.401502
ST14	Q9Y5Y6	sp|Q9Y5Y6|ST14_HUMAN Suppressor of tumorigenicity 14 protein OS=Homo sapiens OX=9606 GN=ST14 PE=1 SV=2	3	5.17303e-06	1.55525e-05	0.000766838	0.00203734	0.332617	-1.58807
PRSS23	O95084	sp|O95084|PRS23_HUMAN Serine protease 23 OS=Homo sapiens OX=9606 GN=PRSS23 PE=1 SV=1	1	7.77206e-06	1.0657e-05	0.0167687	0.0153471	0.72929	-0.455435
FKBP9	O95302	sp|O95302|FKBP9_HUMAN Peptidyl-prolyl cis-trans isomerase FKBP9 OS=Homo sapiens OX=9606 GN=FKBP9 PE=1 SV=2	3	3.6925e-06	1.18074e-05	0.0474266	0.0327669	0.312726	-1.67703
LAMC2	Q13753	sp|Q13753|LAMC2_HUMAN Laminin subunit gamma-2 OS=Homo sapiens OX=9606 GN=LAMC2 PE=1 SV=2	7	4.0203e-06	1.60268e-05	0.00119903	0.00272606	0.250849	-1.99511
CADM1	Q9BY67	sp|Q9BY67|CADM1_HUMAN Cell adhesion molecule 1 OS=Homo sapiens OX=9606 GN=CADM1 PE=1 SV=2	2	4.82856e-06	1.42857e-05	0.000218522	0.00104594	0.337999	-1.56491
XPO1	O14980	sp|O14980|XPO1_HUMAN Exportin-1 OS=Homo sapiens OX=9606 GN=XPO1 PE=1 SV=1	5	9.63883e-06	6.66683e-06	0.0002552	0.00113186	1.44579	0.531856
PSMD14	O00487	sp|O00487|PSDE_HUMAN 26S proteasome non-ATPase regulatory subunit 14 OS=Homo sapiens OX=9606 GN=PSMD14 PE=1 SV=1	1	9.26966e-06	7.21208e-06	0.00503891	0.00677074	1.2853	0.362101
PRMT1	Q99873	sp|Q99873|ANM1_HUMAN Protein arginine N-methyltransferase 1 OS=Homo sapiens OX=9606 GN=PRMT1 PE=1 SV=3	2	5.65299e-06	1.03148e-05	0.000483768	0.00159112	0.548044	-0.867636
ERBIN	Q96RT1	sp|Q96RT1|ERBIN_HUMAN Erbin OS=Homo sapiens OX=9606 GN=ERBIN PE=1 SV=2	6	5.5417e-06	1.24509e-05	0.000293989	0.00120999	0.445084	-1.16785
MMAB	Q96EY8	sp|Q96EY8|MMAB_HUMAN Cob(I)yrinic acid a,c-diamide adenosyltransferase, mitochondrial OS=Homo sapiens OX=9606 GN=MMAB PE=1 SV=1	1	4.85519e-06	1.32497e-05	0.0283459	0.02245	0.366438	-1.44836
ERBB2	P04626	sp|P04626|ERBB2_HUMAN Receptor tyrosine-protein kinase erbB-2 OS=Homo sapiens OX=9606 GN=ERBB2 PE=1 SV=1	6	5.2707e-06	1.24032e-05	4.27051e-05	0.000464612	0.424948	-1.23464
KAT7	O95251	sp|O95251|KAT7_HUMAN Histone acetyltransferase KAT7 OS=Homo sapiens OX=9606 GN=KAT7 PE=1 SV=1	2	1.11971e-05	7.1752e-06	0.00223487	0.00401641	1.56052	0.642028
LRP1	Q07954	sp|Q07954|LRP1_HUMAN Prolow-density lipoprotein receptor-related protein 1 OS=Homo sapiens OX=9606 GN=LRP1 PE=1 SV=2	27	6.018e-07	1.70917e-05	4.34303e-06	0.000179668	0.0352102	-4.82786
SLC26A6	Q9BXS9	sp|Q9BXS9|S26A6_HUMAN Solute carrier family 26 member 6 OS=Homo sapiens OX=9606 GN=SLC26A6 PE=1 SV=1	3	2.76218e-06	1.32057e-05	0.0121391	0.0122133	0.209166	-2.25728
EXOSC8	Q96B26	sp|Q96B26|EXOS8_HUMAN Exosome complex component RRP43 OS=Homo sapiens OX=9606 GN=EXOSC8 PE=1 SV=1	1	1.44072e-05	4.05284e-06	0.0182848	0.0162679	3.55485	1.82979
HEXIM1	O94992	sp|O94992|HEXI1_HUMAN Protein HEXIM1 OS=Homo sapiens OX=9606 GN=HEXIM1 PE=1 SV=1;sp|Q96MH2|HEXI2_HUMAN Protein HEXIM2 OS=Homo sapiens OX=9606 GN=HEXIM2 PE=1 SV=1	2	1.22167e-05	5.46207e-06	0.00053967	0.00168635	2.23664	1.16133
SPATS2L	Q9NUQ6	sp|Q9NUQ6|SPS2L_HUMAN SPATS2-like protein OS=Homo sapiens OX=9606 GN=SPATS2L PE=1 SV=2	2	9.11241e-06	6.4871e-06	0.0125133	0.0124554	1.4047	0.49026
FKBP4	Q02790	sp|Q02790|FKBP4_HUMAN Peptidyl-prolyl cis-trans isomerase FKBP4 OS=Homo sapiens OX=9606 GN=FKBP4 PE=1 SV=3	4	4.35679e-06	8.30661e-06	0.0244261	0.0201101	0.524497	-0.930994
APOB	P04114	sp|P04114|APOB_HUMAN Apolipoprotein B-100 OS=Homo sapiens OX=9606 GN=APOB PE=1 SV=2	22	1.17281e-06	1.34501e-05	3.84309e-05	0.000443451	0.0871973	-3.51957
FGB	P02675	sp|P02675|FIBB_HUMAN Fibrinogen beta chain OS=Homo sapiens OX=9606 GN=FGB PE=1 SV=2	2	7.10354e-06	1.04576e-05	0.00650113	0.00799032	0.679268	-0.557947
FIP1L1	Q6UN15	sp|Q6UN15|FIP1_HUMAN Pre-mRNA 3-end-processing factor FIP1 OS=Homo sapiens OX=9606 GN=FIP1L1 PE=1 SV=1	2	9.00373e-06	5.29338e-06	0.00381362	0.00570558	1.70094	0.766333
NOL6	Q9H6R4	sp|Q9H6R4|NOL6_HUMAN Nucleolar protein 6 OS=Homo sapiens OX=9606 GN=NOL6 PE=1 SV=2	4	1.09187e-05	4.33888e-06	6.54777e-05	0.000555828	2.51649	1.33141
TMEM92	Q6UXU6	sp|Q6UXU6|TMM92_HUMAN Transmembrane protein 92 OS=Homo sapiens OX=9606 GN=TMEM92 PE=2 SV=1	1	5.02437e-06	9.04881e-06	0.000664695	0.00188146	0.555252	-0.848786
CUL1	Q13616	sp|Q13616|CUL1_HUMAN Cullin-1 OS=Homo sapiens OX=9606 GN=CUL1 PE=1 SV=2	4	8.29299e-06	6.70478e-06	0.0189956	0.0166822	1.23688	0.306702
AHSG	P02765	sp|P02765|FETUA_HUMAN Alpha-2-HS-glycoprotein OS=Homo sapiens OX=9606 GN=AHSG PE=1 SV=2	3	1.03486e-06	1.82646e-05	9.55736e-05	0.000668377	0.0566595	-4.14154
DIAPH1	O60610	sp|O60610|DIAP1_HUMAN Protein diaphanous homolog 1 OS=Homo sapiens OX=9606 GN=DIAPH1 PE=1 SV=2	6	1.03678e-05	6.28506e-06	0.0105378	0.0111153	1.64959	0.722108
MRE11	P49959	sp|P49959|MRE11_HUMAN Double-strand break repair protein MRE11 OS=Homo sapiens OX=9606 GN=MRE11 PE=1 SV=3	4	8.54024e-06	5.63016e-06	0.0249339	0.0204174	1.51687	0.601101
RAP1A	P62834	sp|P62834|RAP1A_HUMAN Ras-related protein Rap-1A OS=Homo sapiens OX=9606 GN=RAP1A PE=1 SV=1	1	4.95729e-06	7.10077e-06	0.00270344	0.00453194	0.698134	-0.518424
DSC2	Q02487	sp|Q02487|DSC2_HUMAN Desmocollin-2 OS=Homo sapiens OX=9606 GN=DSC2 PE=1 SV=1	3	5.19961e-06	9.74243e-06	0.0227915	0.0190978	0.533707	-0.905879
CYP1A1	P04798	sp|P04798|CP1A1_HUMAN Cytochrome P450 1A1 OS=Homo sapiens OX=9606 GN=CYP1A1 PE=1 SV=1	6	2.20344e-08	7.10339e-06	0.0428335	0.0303787	0.00310196	-8.33261
PARS2	Q7L3T8	sp|Q7L3T8|SYPM_HUMAN Probable proline--tRNA ligase, mitochondrial OS=Homo sapiens OX=9606 GN=PARS2 PE=1 SV=1	3	9.7439e-06	7.41957e-06	0.0323183	0.024734	1.31327	0.393164
OSBPL3	Q9H4L5	sp|Q9H4L5|OSBL3_HUMAN Oxysterol-binding protein-related protein 3 OS=Homo sapiens OX=9606 GN=OSBPL3 PE=1 SV=1	5	9.45749e-06	7.41075e-06	0.0153199	0.0144163	1.27619	0.351839
METTL17	Q9H7H0	sp|Q9H7H0|MET17_HUMAN Methyltransferase-like protein 17, mitochondrial OS=Homo sapiens OX=9606 GN=METTL17 PE=1 SV=1	3	4.35322e-06	1.04036e-05	0.0341481	0.0257538	0.418433	-1.25693
SLC44A2	Q8IWA5	sp|Q8IWA5|CTL2_HUMAN Choline transporter-like protein 2 OS=Homo sapiens OX=9606 GN=SLC44A2 PE=1 SV=3	2	6.83921e-06	9.92877e-06	0.000135506	0.000811915	0.688827	-0.537785
ALG10	Q5BKT4	sp|Q5BKT4|AG10A_HUMAN Dol-P-Glc:Glc(2)Man(9)GlcNAc(2)-PP-Dol alpha-1,2-glucosyltransferase OS=Homo sapiens OX=9606 GN=ALG10 PE=2 SV=1;sp|Q5I7T1|AG10B_HUMAN Putative Dol-P-Glc:Glc(2)Man(9)GlcNAc(2)-PP-Dol alpha-1,2-glucosyltransferase OS=Homo sapiens OX=960	2	5.16275e-06	1.00056e-05	0.0419829	0.0299502	0.515986	-0.954596
FAM234A	Q9H0X4	sp|Q9H0X4|F234A_HUMAN Protein FAM234A OS=Homo sapiens OX=9606 GN=FAM234A PE=1 SV=1	1	5.8058e-06	8.70736e-06	0.00525096	0.00693343	0.666769	-0.584741
BMS1	Q14692	sp|Q14692|BMS1_HUMAN Ribosome biogenesis protein BMS1 homolog OS=Homo sapiens OX=9606 GN=BMS1 PE=1 SV=1	3	1.70103e-05	3.90603e-06	1.97295e-07	4.09295e-05	4.35489	2.12264
TMEM143	Q96AN5	sp|Q96AN5|TM143_HUMAN Transmembrane protein 143 OS=Homo sapiens OX=9606 GN=TMEM143 PE=2 SV=1	2	1.02581e-05	5.29095e-06	0.0079003	0.00912076	1.93879	0.95516
PSMD8	P48556	sp|P48556|PSMD8_HUMAN 26S proteasome non-ATPase regulatory subunit 8 OS=Homo sapiens OX=9606 GN=PSMD8 PE=1 SV=2	3	9.25484e-06	5.46892e-06	0.00805205	0.0092436	1.69226	0.758953
ABHD3	Q8WU67	sp|Q8WU67|ABHD3_HUMAN Phospholipase ABHD3 OS=Homo sapiens OX=9606 GN=ABHD3 PE=1 SV=2	1	6.26554e-06	9.56779e-06	0.00680669	0.00823993	0.654857	-0.610748
AIP	O00170	sp|O00170|AIP_HUMAN AH receptor-interacting protein OS=Homo sapiens OX=9606 GN=AIP PE=1 SV=2	2	1.0351e-05	5.29084e-06	6.25749e-05	0.000546218	1.95641	0.968207
AFP	P02771	sp|P02771|FETA_HUMAN Alpha-fetoprotein OS=Homo sapiens OX=9606 GN=AFP PE=1 SV=1	3	1.62395e-06	1.37366e-05	3.66281e-07	5.84788e-05	0.118221	-3.08044
KPNA1	P52294	sp|P52294|IMA5_HUMAN Importin subunit alpha-5 OS=Homo sapiens OX=9606 GN=KPNA1 PE=1 SV=3	2	1.57869e-06	7.65654e-06	0.0200904	0.0173571	0.206188	-2.27796
MRPL10	Q7Z7H8	sp|Q7Z7H8|RM10_HUMAN 39S ribosomal protein L10, mitochondrial OS=Homo sapiens OX=9606 GN=MRPL10 PE=1 SV=3	2	1.04124e-05	1.80579e-06	0.00670857	0.0081606	5.76609	2.52759
RPS6KA3	P51812	sp|P51812|KS6A3_HUMAN Ribosomal protein S6 kinase alpha-3 OS=Homo sapiens OX=9606 GN=RPS6KA3 PE=1 SV=1	3	8.63124e-06	6.60743e-06	0.0120682	0.0121668	1.30629	0.38548
SIN3A	Q96ST3	sp|Q96ST3|SIN3A_HUMAN Paired amphipathic helix protein Sin3a OS=Homo sapiens OX=9606 GN=SIN3A PE=1 SV=2	5	5.24863e-06	7.67412e-06	0.0386847	0.0282403	0.683938	-0.548062
AKAP6	Q13023	sp|Q13023|AKAP6_HUMAN A-kinase anchor protein 6 OS=Homo sapiens OX=9606 GN=AKAP6 PE=1 SV=3	2	8.68377e-06	8.80017e-07	0.000886148	0.00224171	9.86773	3.30272
DAB2	P98082	sp|P98082|DAB2_HUMAN Disabled homolog 2 OS=Homo sapiens OX=9606 GN=DAB2 PE=1 SV=3	2	5.88343e-06	7.75691e-06	0.0467439	0.0324078	0.758475	-0.398826
PDLIM5	Q96HC4	sp|Q96HC4|PDLI5_HUMAN PDZ and LIM domain protein 5 OS=Homo sapiens OX=9606 GN=PDLIM5 PE=1 SV=5	4	1.00315e-05	5.60248e-06	0.0290114	0.0228437	1.79055	0.840402
IFNGR1	P15260	sp|P15260|INGR1_HUMAN Interferon gamma receptor 1 OS=Homo sapiens OX=9606 GN=IFNGR1 PE=1 SV=1	2	1.5564e-06	1.10566e-05	0.0054245	0.00706244	0.140767	-2.82861
COQ3	Q9NZJ6	sp|Q9NZJ6|COQ3_HUMAN Ubiquinone biosynthesis O-methyltransferase, mitochondrial OS=Homo sapiens OX=9606 GN=COQ3 PE=1 SV=3	1	5.8501e-06	7.66383e-06	0.0187367	0.0165325	0.763338	-0.389606
ADCY6	O43306	sp|O43306|ADCY6_HUMAN Adenylate cyclase type 6 OS=Homo sapiens OX=9606 GN=ADCY6 PE=1 SV=2	3	4.80875e-06	7.69502e-06	0.0244086	0.0200995	0.624917	-0.678264
PDP1	Q9P0J1	sp|Q9P0J1|PDP1_HUMAN [Pyruvate dehydrogenase [acetyl-transferring]]-phosphatase 1, mitochondrial OS=Homo sapiens OX=9606 GN=PDP1 PE=1 SV=3	2	5.63044e-06	7.83401e-06	0.00306654	0.00492874	0.718718	-0.476502
CAB39	Q9Y376	sp|Q9Y376|CAB39_HUMAN Calcium-binding protein 39 OS=Homo sapiens OX=9606 GN=CAB39 PE=1 SV=1	2	5.76717e-06	1.00262e-05	0.00424424	0.00610641	0.575207	-0.797846
ITGB4	P16144	sp|P16144|ITB4_HUMAN Integrin beta-4 OS=Homo sapiens OX=9606 GN=ITGB4 PE=1 SV=5	7	4.6909e-06	7.41186e-06	0.00355335	0.00544744	0.63289	-0.659973
YIPF3	Q9GZM5	sp|Q9GZM5|YIPF3_HUMAN Protein YIPF3 OS=Homo sapiens OX=9606 GN=YIPF3 PE=1 SV=1	2	4.137e-06	8.65984e-06	0.0246992	0.0202758	0.477722	-1.06576
USH1C	Q9Y6N9	sp|Q9Y6N9|USH1C_HUMAN Harmonin OS=Homo sapiens OX=9606 GN=USH1C PE=1 SV=3	3	7.04676e-06	9.4609e-06	0.00322416	0.00510211	0.74483	-0.425017
APOL2	Q9BQE5	sp|Q9BQE5|APOL2_HUMAN Apolipoprotein L2 OS=Homo sapiens OX=9606 GN=APOL2 PE=1 SV=1	4	5.56749e-06	1.18003e-05	0.0189155	0.0166361	0.47181	-1.08372
GLYCTK	Q8IVS8	sp|Q8IVS8|GLCTK_HUMAN Glycerate kinase OS=Homo sapiens OX=9606 GN=GLYCTK PE=1 SV=1	2	2.20344e-08	1.00657e-05	0.000523278	0.00165943	0.00218905	-8.83548
PRR14L	Q5THK1	sp|Q5THK1|PR14L_HUMAN Protein PRR14L OS=Homo sapiens OX=9606 GN=PRR14L PE=1 SV=1	2	7.81418e-06	5.56577e-06	0.000625729	0.00182455	1.40397	0.489513
POLR2B	P30876	sp|P30876|RPB2_HUMAN DNA-directed RNA polymerase II subunit RPB2 OS=Homo sapiens OX=9606 GN=POLR2B PE=1 SV=1	4	3.4637e-06	5.78428e-06	0.00653426	0.00801775	0.598814	-0.739821
WDR11	Q9BZH6	sp|Q9BZH6|WDR11_HUMAN WD repeat-containing protein 11 OS=Homo sapiens OX=9606 GN=WDR11 PE=1 SV=1	3	4.48755e-06	7.13757e-06	0.00164939	0.00330992	0.628722	-0.669507
SERPINA1	P01009	sp|P01009|A1AT_HUMAN Alpha-1-antitrypsin OS=Homo sapiens OX=9606 GN=SERPINA1 PE=1 SV=3	3	3.30532e-06	7.1764e-06	0.00191838	0.00362402	0.460581	-1.11847
MRPS23	Q9Y3D9	sp|Q9Y3D9|RT23_HUMAN 28S ribosomal protein S23, mitochondrial OS=Homo sapiens OX=9606 GN=MRPS23 PE=1 SV=2	2	7.78371e-06	1.04791e-05	0.0158144	0.0147398	0.742781	-0.42899
MRPL55	Q7Z7F7	sp|Q7Z7F7|RM55_HUMAN 39S ribosomal protein L55, mitochondrial OS=Homo sapiens OX=9606 GN=MRPL55 PE=1 SV=1	2	6.2183e-06	5.04004e-06	0.0109822	0.0114306	1.23378	0.303084
TMPRSS4	Q9NRS4	sp|Q9NRS4|TMPS4_HUMAN Transmembrane protease serine 4 OS=Homo sapiens OX=9606 GN=TMPRSS4 PE=1 SV=2	2	9.72578e-07	1.06945e-05	0.00453311	0.0063585	0.0909419	-3.45891
ST6GAL1	P15907	sp|P15907|SIAT1_HUMAN Beta-galactoside alpha-2,6-sialyltransferase 1 OS=Homo sapiens OX=9606 GN=ST6GAL1 PE=1 SV=1	3	2.75527e-06	1.14187e-05	0.00166527	0.00332858	0.241295	-2.05113
UPB1	Q9UBR1	sp|Q9UBR1|BUP1_HUMAN Beta-ureidopropionase OS=Homo sapiens OX=9606 GN=UPB1 PE=1 SV=1	2	6.95068e-06	3.06008e-08	0.000364945	0.00136274	227.14	7.82744
VPS25	Q9BRG1	sp|Q9BRG1|VPS25_HUMAN Vacuolar protein-sorting-associated protein 25 OS=Homo sapiens OX=9606 GN=VPS25 PE=1 SV=1	2	1.40749e-06	1.13319e-05	0.00338803	0.00527675	0.124205	-3.0092
RPF2	Q9H7B2	sp|Q9H7B2|RPF2_HUMAN Ribosome production factor 2 homolog OS=Homo sapiens OX=9606 GN=RPF2 PE=1 SV=2	2	1.56201e-05	3.06008e-08	0.000255393	0.00113228	510.446	8.99561
AKAP2	Q9Y2D5	sp|Q9Y2D5|AKAP2_HUMAN A-kinase anchor protein 2 OS=Homo sapiens OX=9606 GN=AKAP2 PE=1 SV=3	4	7.25322e-06	4.66016e-06	0.00852143	0.00961497	1.55643	0.638243
SLC29A1	Q99808	sp|Q99808|S29A1_HUMAN Equilibrative nucleoside transporter 1 OS=Homo sapiens OX=9606 GN=SLC29A1 PE=1 SV=3	2	5.79463e-07	1.62351e-05	0.000101747	0.000693625	0.0356919	-4.80826
ATP6AP2	O75787	sp|O75787|RENR_HUMAN Renin receptor OS=Homo sapiens OX=9606 GN=ATP6AP2 PE=1 SV=2	2	2.01941e-06	9.31845e-06	0.00453422	0.00635944	0.216711	-2.20616
MUT	P22033	sp|P22033|MUTA_HUMAN Methylmalonyl-CoA mutase, mitochondrial OS=Homo sapiens OX=9606 GN=MUT PE=1 SV=4	4	4.59374e-06	7.42904e-06	0.000361481	0.00135572	0.618349	-0.693507
ITM2C	Q9NQX7	sp|Q9NQX7|ITM2C_HUMAN Integral membrane protein 2C OS=Homo sapiens OX=9606 GN=ITM2C PE=1 SV=1	2	1.9466e-06	1.1206e-05	0.00071765	0.0019597	0.17371	-2.52524
VPS51	Q9UID3	sp|Q9UID3|VPS51_HUMAN Vacuolar protein sorting-associated protein 51 homolog OS=Homo sapiens OX=9606 GN=VPS51 PE=1 SV=2	3	7.49744e-06	3.87342e-06	0.00730505	0.00863129	1.93561	0.952791
AATF	Q9NY61	sp|Q9NY61|AATF_HUMAN Protein AATF OS=Homo sapiens OX=9606 GN=AATF PE=1 SV=1	3	8.2515e-06	3.47377e-06	0.0474558	0.0327822	2.37538	1.24816
GTF3C4	Q9UKN8	sp|Q9UKN8|TF3C4_HUMAN General transcription factor 3C polypeptide 4 OS=Homo sapiens OX=9606 GN=GTF3C4 PE=1 SV=2	5	3.53014e-06	6.27451e-06	0.0206552	0.0177195	0.562616	-0.829778
TIMMDC1	Q9NPL8	sp|Q9NPL8|TIDC1_HUMAN Complex I assembly factor TIMMDC1, mitochondrial OS=Homo sapiens OX=9606 GN=TIMMDC1 PE=1 SV=2	1	2.22316e-06	7.41586e-06	0.0102438	0.0109022	0.299785	-1.738
MTHFD1L	Q6UB35	sp|Q6UB35|C1TM_HUMAN Monofunctional C1-tetrahydrofolate synthase, mitochondrial OS=Homo sapiens OX=9606 GN=MTHFD1L PE=1 SV=1	6	3.70756e-06	6.03878e-06	0.0359865	0.0267811	0.613959	-0.703785
EXOSC3	Q9NQT5	sp|Q9NQT5|EXOS3_HUMAN Exosome complex component RRP40 OS=Homo sapiens OX=9606 GN=EXOSC3 PE=1 SV=3	1	1.0502e-05	3.06008e-08	0.000406444	0.00144237	343.195	8.42288
CDK5RAP1	Q96SZ6	sp|Q96SZ6|CK5P1_HUMAN CDK5 regulatory subunit-associated protein 1 OS=Homo sapiens OX=9606 GN=CDK5RAP1 PE=1 SV=2	3	2.74354e-06	8.69653e-06	0.00181801	0.00350103	0.315475	-1.6644
SLC38A10	Q9HBR0	sp|Q9HBR0|S38AA_HUMAN Putative sodium-coupled neutral amino acid transporter 10 OS=Homo sapiens OX=9606 GN=SLC38A10 PE=1 SV=2	7	1.68784e-06	9.02943e-06	0.000178789	0.000936069	0.186927	-2.41946
SHROOM3	Q8TF72	sp|Q8TF72|SHRM3_HUMAN Protein Shroom3 OS=Homo sapiens OX=9606 GN=SHROOM3 PE=1 SV=2	1	1.04664e-06	1.0355e-05	0.00177288	0.0034514	0.101076	-3.30649
DNAJC13	O75165	sp|O75165|DJC13_HUMAN DnaJ homolog subfamily C member 13 OS=Homo sapiens OX=9606 GN=DNAJC13 PE=1 SV=5	10	6.61891e-06	4.94543e-06	0.0228451	0.0191315	1.33839	0.420499
POLR2A	P24928	sp|P24928|RPB1_HUMAN DNA-directed RNA polymerase II subunit RPB1 OS=Homo sapiens OX=9606 GN=POLR2A PE=1 SV=2	10	3.16942e-06	7.41121e-06	0.0199808	0.0172861	0.427653	-1.22549
LLGL1	Q15334	sp|Q15334|L2GL1_HUMAN Lethal(2) giant larvae protein homolog 1 OS=Homo sapiens OX=9606 GN=LLGL1 PE=1 SV=3	4	4.1874e-06	6.36536e-06	0.00349673	0.00538959	0.657843	-0.604186
FUCA2	Q9BTY2	sp|Q9BTY2|FUCO2_HUMAN Plasma alpha-L-fucosidase OS=Homo sapiens OX=9606 GN=FUCA2 PE=1 SV=2	2	3.82917e-06	5.89209e-06	0.00104537	0.00250071	0.649883	-0.621749
INSR	P06213	sp|P06213|INSR_HUMAN Insulin receptor OS=Homo sapiens OX=9606 GN=INSR PE=1 SV=4	4	4.31671e-06	6.29992e-06	0.000672011	0.00189177	0.685201	-0.5454
CTSS	P25774	sp|P25774|CATS_HUMAN Cathepsin S OS=Homo sapiens OX=9606 GN=CTSS PE=1 SV=3	2	4.64596e-07	9.999e-06	3.6659e-05	0.000434901	0.0464642	-4.42774
NPNT	Q6UXI9	sp|Q6UXI9|NPNT_HUMAN Nephronectin OS=Homo sapiens OX=9606 GN=NPNT PE=2 SV=3	2	3.6123e-06	7.78734e-06	0.000357297	0.00134715	0.463868	-1.10821
MFGE8	Q08431	sp|Q08431|MFGM_HUMAN Lactadherin OS=Homo sapiens OX=9606 GN=MFGE8 PE=1 SV=3	2	2.54815e-06	6.28663e-06	0.0101351	0.0108223	0.405328	-1.30284
ACAD10	Q6JQN1	sp|Q6JQN1|ACD10_HUMAN Acyl-CoA dehydrogenase family member 10 OS=Homo sapiens OX=9606 GN=ACAD10 PE=1 SV=1	4	2.41359e-06	4.86646e-06	0.00954243	0.0103908	0.495964	-1.01169
NPC1	O15118	sp|O15118|NPC1_HUMAN NPC intracellular cholesterol transporter 1 OS=Homo sapiens OX=9606 GN=NPC1 PE=1 SV=2	2	3.29465e-06	6.35825e-06	0.0311523	0.0240797	0.51817	-0.948504
TOM1	O60784	sp|O60784|TOM1_HUMAN Target of Myb protein 1 OS=Homo sapiens OX=9606 GN=TOM1 PE=1 SV=2	2	7.77745e-06	5.0571e-06	0.0276631	0.0220413	1.53793	0.620986
FAM49B	Q9NUQ9	sp|Q9NUQ9|FA49B_HUMAN Protein FAM49B OS=Homo sapiens OX=9606 GN=FAM49B PE=1 SV=1	2	6.32327e-06	3.90281e-06	0.00477685	0.00656158	1.62018	0.696157
MYO15B	Q96JP2	sp|Q96JP2|MY15B_HUMAN Unconventional myosin-XVB OS=Homo sapiens OX=9606 GN=MYO15B PE=1 SV=3	6	5.13111e-06	4.14974e-06	0.011589	0.0118477	1.23649	0.306251
PLEKHA7	Q6IQ23	sp|Q6IQ23|PKHA7_HUMAN Pleckstrin homology domain-containing family A member 7 OS=Homo sapiens OX=9606 GN=PLEKHA7 PE=1 SV=2	4	7.77087e-06	3.85747e-06	0.00790977	0.00912847	2.0145	1.01042
EPPK1	P58107	sp|P58107|EPIPL_HUMAN Epiplakin OS=Homo sapiens OX=9606 GN=EPPK1 PE=1 SV=3	21	7.39013e-06	2.65343e-06	0.00256203	0.00438381	2.78513	1.47774
TNFRSF10B	O14763	sp|O14763|TR10B_HUMAN Tumor necrosis factor receptor superfamily member 10B OS=Homo sapiens OX=9606 GN=TNFRSF10B PE=1 SV=2	1	3.9133e-06	6.32225e-06	0.0130884	0.0128755	0.618972	-0.692054
BCKDK	O14874	sp|O14874|BCKD_HUMAN [3-methyl-2-oxobutanoate dehydrogenase [lipoamide]] kinase, mitochondrial OS=Homo sapiens OX=9606 GN=BCKDK PE=1 SV=2	2	2.20344e-08	8.81484e-06	0.0323868	0.024772	0.0024997	-8.64403
LEMD3	Q9Y2U8	sp|Q9Y2U8|MAN1_HUMAN Inner nuclear membrane protein Man1 OS=Homo sapiens OX=9606 GN=LEMD3 PE=1 SV=2	5	4.10431e-06	6.54493e-06	0.000163566	0.000890428	0.627098	-0.673238
FBLN1	P23142	sp|P23142|FBLN1_HUMAN Fibulin-1 OS=Homo sapiens OX=9606 GN=FBLN1 PE=1 SV=4	2	2.20344e-08	8.501e-06	0.00306715	0.00492942	0.00259198	-8.59173
COX6A1	P12074	sp|P12074|CX6A1_HUMAN Cytochrome c oxidase subunit 6A1, mitochondrial OS=Homo sapiens OX=9606 GN=COX6A1 PE=1 SV=4	1	1.19697e-05	3.06008e-08	0.00690921	0.00832201	391.156	8.6116
TMEM209	Q96SK2	sp|Q96SK2|TM209_HUMAN Transmembrane protein 209 OS=Homo sapiens OX=9606 GN=TMEM209 PE=1 SV=2	2	2.20056e-06	4.31813e-06	0.00960859	0.0104394	0.509609	-0.972536
RGPD4	Q7Z3J3	sp|Q7Z3J3|RGPD4_HUMAN RanBP2-like and GRIP domain-containing protein 4 OS=Homo sapiens OX=9606 GN=RGPD4 PE=2 SV=3;sp|A6NKT7|RGPD3_HUMAN RanBP2-like and GRIP domain-containing protein 3 OS=Homo sapiens OX=9606 GN=RGPD3 PE=3 SV=2;sp|Q99666|RGPD5_HUMAN RANBP2	1	5.21936e-06	4.33141e-06	0.0144169	0.0138092	1.205	0.269036
DDX24	Q9GZR7	sp|Q9GZR7|DDX24_HUMAN ATP-dependent RNA helicase DDX24 OS=Homo sapiens OX=9606 GN=DDX24 PE=1 SV=1	2	5.18748e-06	3.66502e-06	0.0247807	0.0203251	1.41541	0.501215
NRM	Q8IXM6	sp|Q8IXM6|NRM_HUMAN Nurim OS=Homo sapiens OX=9606 GN=NRM PE=1 SV=1	3	1.10415e-05	1.54303e-06	0.0307621	0.0238578	7.15571	2.8391
CUL2	Q13617	sp|Q13617|CUL2_HUMAN Cullin-2 OS=Homo sapiens OX=9606 GN=CUL2 PE=1 SV=2	3	2.71344e-06	4.76887e-06	0.0486195	0.0333884	0.568989	-0.813527
MET	P08581	sp|P08581|MET_HUMAN Hepatocyte growth factor receptor OS=Homo sapiens OX=9606 GN=MET PE=1 SV=4	2	2.73015e-06	6.39297e-06	0.0152844	0.0143929	0.427055	-1.22751
APP	P05067	sp|P05067|A4_HUMAN Amyloid-beta A4 protein OS=Homo sapiens OX=9606 GN=APP PE=1 SV=3	3	2.20344e-08	5.81127e-06	0.00124465	0.00278872	0.00379167	-8.04295
L1RE1	Q9UN81	sp|Q9UN81|LORF1_HUMAN LINE-1 retrotransposable element ORF1 protein OS=Homo sapiens OX=9606 GN=L1RE1 PE=1 SV=1	2	5.11813e-06	7.28595e-06	0.0377093	0.0277192	0.702466	-0.509501
DNAJC10	Q8IXB1	sp|Q8IXB1|DJC10_HUMAN DnaJ homolog subfamily C member 10 OS=Homo sapiens OX=9606 GN=DNAJC10 PE=1 SV=2	3	1.81076e-06	1.11836e-05	6.50168e-07	7.48547e-05	0.161913	-2.62671
GART	P22102	sp|P22102|PUR2_HUMAN Trifunctional purine biosynthetic protein adenosine-3 OS=Homo sapiens OX=9606 GN=GART PE=1 SV=1	2	5.00245e-06	3.04672e-06	0.00282596	0.0046555	1.64191	0.715377
ADNP	Q9H2P0	sp|Q9H2P0|ADNP_HUMAN Activity-dependent neuroprotector homeobox protein OS=Homo sapiens OX=9606 GN=ADNP PE=1 SV=1	4	3.09341e-06	5.81256e-06	0.00233782	0.00413595	0.532194	-0.909976
MAN2B1	O00754	sp|O00754|MA2B1_HUMAN Lysosomal alpha-mannosidase OS=Homo sapiens OX=9606 GN=MAN2B1 PE=1 SV=3	4	2.66721e-06	4.88175e-06	0.00599093	0.00755629	0.546364	-0.872067
NAGLU	P54802	sp|P54802|ANAG_HUMAN Alpha-N-acetylglucosaminidase OS=Homo sapiens OX=9606 GN=NAGLU PE=1 SV=2	3	3.28003e-06	4.67359e-06	0.040868	0.029381	0.701822	-0.510823
SCYL1	Q96KG9	sp|Q96KG9|SCYL1_HUMAN N-terminal kinase-like protein OS=Homo sapiens OX=9606 GN=SCYL1 PE=1 SV=1	3	3.27711e-06	4.32544e-06	0.00797287	0.00917968	0.757637	-0.400422
ALDH16A1	Q8IZ83	sp|Q8IZ83|A16A1_HUMAN Aldehyde dehydrogenase family 16 member A1 OS=Homo sapiens OX=9606 GN=ALDH16A1 PE=1 SV=2	2	2.10531e-06	4.5168e-06	0.0205314	0.0176405	0.466106	-1.10127
ARFIP2	P53365	sp|P53365|ARFP2_HUMAN Arfaptin-2 OS=Homo sapiens OX=9606 GN=ARFIP2 PE=1 SV=1	1	4.85282e-06	3.43948e-06	0.00993676	0.0106768	1.41092	0.496631
DPYSL3	Q14195	sp|Q14195|DPYL3_HUMAN Dihydropyrimidinase-related protein 3 OS=Homo sapiens OX=9606 GN=DPYSL3 PE=1 SV=1	2	7.52997e-06	2.8865e-06	0.00550729	0.00713153	2.60869	1.38332
SDSL	Q96GA7	sp|Q96GA7|SDSL_HUMAN Serine dehydratase-like OS=Homo sapiens OX=9606 GN=SDSL PE=1 SV=1	1	4.61163e-06	3.23784e-06	0.0242087	0.0199775	1.42429	0.510244
TIA1	P31483	sp|P31483|TIA1_HUMAN Nucleolysin TIA-1 isoform p40 OS=Homo sapiens OX=9606 GN=TIA1 PE=1 SV=3	2	7.93802e-06	2.12811e-06	0.00584023	0.00742632	3.73009	1.89921
SEMA4G	Q9NTN9	sp|Q9NTN9|SEM4G_HUMAN Semaphorin-4G OS=Homo sapiens OX=9606 GN=SEMA4G PE=1 SV=1	2	3.449e-06	7.0659e-06	0.0330606	0.0251438	0.488119	-1.03469
TAOK3	Q9H2K8	sp|Q9H2K8|TAOK3_HUMAN Serine/threonine-protein kinase TAO3 OS=Homo sapiens OX=9606 GN=TAOK3 PE=1 SV=2;sp|Q7L7X3|TAOK1_HUMAN Serine/threonine-protein kinase TAO1 OS=Homo sapiens OX=9606 GN=TAOK1 PE=1 SV=1;sp|Q9UL54|TAOK2_HUMAN Serine/threonine-protein kinas	2	5.04636e-06	3.05902e-06	0.0455327	0.0317645	1.64967	0.722173
MIPEP	Q99797	sp|Q99797|MIPEP_HUMAN Mitochondrial intermediate peptidase OS=Homo sapiens OX=9606 GN=MIPEP PE=1 SV=2	3	1.79205e-06	6.65989e-06	0.00774069	0.00899005	0.269082	-1.89388
TRIM27	P14373	sp|P14373|TRI27_HUMAN Zinc finger protein RFP OS=Homo sapiens OX=9606 GN=TRIM27 PE=1 SV=1	2	5.56666e-06	1.21299e-06	0.00240054	0.00420697	4.58921	2.19825
CPSF3	Q9UKF6	sp|Q9UKF6|CPSF3_HUMAN Cleavage and polyadenylation specificity factor subunit 3 OS=Homo sapiens OX=9606 GN=CPSF3 PE=1 SV=1	2	2.49157e-06	4.24422e-06	0.00344014	0.00533114	0.587049	-0.768448
ABLIM1	O14639	sp|O14639|ABLM1_HUMAN Actin-binding LIM protein 1 OS=Homo sapiens OX=9606 GN=ABLIM1 PE=1 SV=3	2	5.16283e-06	2.76605e-06	0.00766862	0.00893051	1.8665	0.900333
DCAF13	Q9NV06	sp|Q9NV06|DCA13_HUMAN DDB1- and CUL4-associated factor 13 OS=Homo sapiens OX=9606 GN=DCAF13 PE=1 SV=2	1	6.88785e-06	2.4251e-06	0.0425938	0.0302585	2.84023	1.50601
UPF1	Q92900	sp|Q92900|RENT1_HUMAN Regulator of nonsense transcripts 1 OS=Homo sapiens OX=9606 GN=UPF1 PE=1 SV=2	4	1.78634e-06	4.07921e-06	0.0260951	0.0211079	0.437912	-1.19129
PCDH11Y	Q9BZA8	sp|Q9BZA8|PC11Y_HUMAN Protocadherin-11 Y-linked OS=Homo sapiens OX=9606 GN=PCDH11Y PE=1 SV=1;sp|Q9BZA7|PC11X_HUMAN Protocadherin-11 X-linked OS=Homo sapiens OX=9606 GN=PCDH11X PE=2 SV=1	1	1.66876e-06	3.12697e-06	0.00307352	0.00493654	0.533667	-0.905989
RBM15	Q96T37	sp|Q96T37|RBM15_HUMAN RNA-binding protein 15 OS=Homo sapiens OX=9606 GN=RBM15 PE=1 SV=2	3	4.59623e-06	2.99373e-06	0.0273304	0.0218404	1.53529	0.618508
SCPEP1	Q9HB40	sp|Q9HB40|RISC_HUMAN Retinoid-inducible serine carboxypeptidase OS=Homo sapiens OX=9606 GN=SCPEP1 PE=1 SV=1	2	1.11881e-06	5.13863e-06	0.0256418	0.0208404	0.217724	-2.19943
GTF2F1	P35269	sp|P35269|T2FA_HUMAN General transcription factor IIF subunit 1 OS=Homo sapiens OX=9606 GN=GTF2F1 PE=1 SV=2	1	4.58008e-06	3.4524e-06	0.0120484	0.0121538	1.32664	0.407775
RACGAP1	Q9H0H5	sp|Q9H0H5|RGAP1_HUMAN Rac GTPase-activating protein 1 OS=Homo sapiens OX=9606 GN=RACGAP1 PE=1 SV=1	2	2.93469e-06	4.48664e-06	0.00557322	0.00719077	0.654096	-0.612426
PTK7	Q13308	sp|Q13308|PTK7_HUMAN Inactive tyrosine-protein kinase 7 OS=Homo sapiens OX=9606 GN=PTK7 PE=1 SV=2	3	1.69157e-06	4.68535e-06	0.0328694	0.0250387	0.361033	-1.4698
POFUT2	Q9Y2G5	sp|Q9Y2G5|OFUT2_HUMAN GDP-fucose protein O-fucosyltransferase 2 OS=Homo sapiens OX=9606 GN=POFUT2 PE=1 SV=3	1	2.20344e-08	5.21819e-06	0.00706092	0.00844195	0.00422261	-7.88765
TXNRD2	Q9NNW7	sp|Q9NNW7|TRXR2_HUMAN Thioredoxin reductase 2, mitochondrial OS=Homo sapiens OX=9606 GN=TXNRD2 PE=1 SV=3	1	2.18137e-06	4.8452e-06	0.00049603	0.00161286	0.450212	-1.15132
NEDD4	P46934	sp|P46934|NEDD4_HUMAN E3 ubiquitin-protein ligase NEDD4 OS=Homo sapiens OX=9606 GN=NEDD4 PE=1 SV=4;sp|Q96PU5|NED4L_HUMAN E3 ubiquitin-protein ligase NEDD4-like OS=Homo sapiens OX=9606 GN=NEDD4L PE=1 SV=2	2	4.47802e-06	3.06594e-06	0.0116917	0.0119168	1.46057	0.546532
ASNA1	O43681	sp|O43681|ASNA_HUMAN ATPase ASNA1 OS=Homo sapiens OX=9606 GN=ASNA1 PE=1 SV=2	2	7.75659e-06	3.06008e-08	0.00233191	0.00412919	253.476	7.98571
TACSTD2	P09758	sp|P09758|TACD2_HUMAN Tumor-associated calcium signal transducer 2 OS=Homo sapiens OX=9606 GN=TACSTD2 PE=1 SV=3	1	2.02737e-06	3.86969e-06	0.00155617	0.00319772	0.523911	-0.932605
APOBEC3B	Q9UH17	sp|Q9UH17|ABC3B_HUMAN DNA dC->dU-editing enzyme APOBEC-3B OS=Homo sapiens OX=9606 GN=APOBEC3B PE=1 SV=1;sp|Q96AK3|ABC3D_HUMAN DNA dC->dU-editing enzyme APOBEC-3D OS=Homo sapiens OX=9606 GN=APOBEC3D PE=1 SV=1	1	2.20344e-08	3.06008e-08	0.00542946	0.00706608	0.72006	-0.473812
SLC39A4	Q6P5W5	sp|Q6P5W5|S39A4_HUMAN Zinc transporter ZIP4 OS=Homo sapiens OX=9606 GN=SLC39A4 PE=1 SV=4	1	5.08422e-07	5.82306e-06	0.00042658	0.00148276	0.0873119	-3.51768
HSPA14	Q0VDF9	sp|Q0VDF9|HSP7E_HUMAN Heat shock 70 kDa protein 14 OS=Homo sapiens OX=9606 GN=HSPA14 PE=1 SV=1	3	6.67529e-06	9.4953e-07	0.0236198	0.0196152	7.0301	2.81354
GTF3C3	Q9Y5Q9	sp|Q9Y5Q9|TF3C3_HUMAN General transcription factor 3C polypeptide 3 OS=Homo sapiens OX=9606 GN=GTF3C3 PE=1 SV=1	2	4.09722e-06	2.83219e-06	0.0105875	0.011151	1.44666	0.532725
SLC6A4	P31645	sp|P31645|SC6A4_HUMAN Sodium-dependent serotonin transporter OS=Homo sapiens OX=9606 GN=SLC6A4 PE=1 SV=1	2	7.24406e-06	3.14723e-06	5.70702e-05	0.000526415	2.30173	1.20272
DNTTIP1	Q9H147	sp|Q9H147|TDIF1_HUMAN Deoxynucleotidyltransferase terminal-interacting protein 1 OS=Homo sapiens OX=9606 GN=DNTTIP1 PE=1 SV=2	2	4.92439e-06	1.60064e-06	0.0418322	0.0298738	3.07652	1.6213
DNMT1	P26358	sp|P26358|DNMT1_HUMAN DNA (cytosine-5)-methyltransferase 1 OS=Homo sapiens OX=9606 GN=DNMT1 PE=1 SV=2	6	2.76768e-06	3.47799e-06	0.00730545	0.0086316	0.795771	-0.329575
SLC38A3	Q99624	sp|Q99624|S38A3_HUMAN Sodium-coupled neutral amino acid transporter 3 OS=Homo sapiens OX=9606 GN=SLC38A3 PE=1 SV=1	2	2.20344e-08	5.86545e-06	0.0027949	0.00462458	0.00375665	-8.05634
AMN	Q9BXJ7	sp|Q9BXJ7|AMNLS_HUMAN Protein amnionless OS=Homo sapiens OX=9606 GN=AMN PE=1 SV=2	2	2.20344e-08	6.85336e-06	0.00487382	0.00664006	0.00321512	-8.28091
DIS3	Q9Y2L1	sp|Q9Y2L1|RRP44_HUMAN Exosome complex exonuclease RRP44 OS=Homo sapiens OX=9606 GN=DIS3 PE=1 SV=2	4	2.4457e-06	4.42901e-06	3.35121e-05	0.000418471	0.5522	-0.856738
CARS	P49589	sp|P49589|SYCC_HUMAN Cysteine--tRNA ligase, cytoplasmic OS=Homo sapiens OX=9606 GN=CARS PE=1 SV=3	2	3.21407e-06	1.99931e-06	0.0268387	0.0215412	1.60759	0.684896
HLTF	Q14527	sp|Q14527|HLTF_HUMAN Helicase-like transcription factor OS=Homo sapiens OX=9606 GN=HLTF PE=1 SV=2	2	2.37954e-06	4.53118e-06	0.00211702	0.00387484	0.525148	-0.929205
AFF4	Q9UHB7	sp|Q9UHB7|AFF4_HUMAN AF4/FMR2 family member 4 OS=Homo sapiens OX=9606 GN=AFF4 PE=1 SV=1	2	5.9525e-07	3.633e-06	0.00431095	0.00616577	0.163845	-2.60959
FNDC3B	Q53EP0	sp|Q53EP0|FND3B_HUMAN Fibronectin type III domain-containing protein 3B OS=Homo sapiens OX=9606 GN=FNDC3B PE=1 SV=2	1	1.6246e-06	3.29612e-06	0.00987784	0.0106346	0.492883	-1.02068
SLC12A4	Q9UP95	sp|Q9UP95|S12A4_HUMAN Solute carrier family 12 member 4 OS=Homo sapiens OX=9606 GN=SLC12A4 PE=1 SV=2;sp|Q9UHW9|S12A6_HUMAN Solute carrier family 12 member 6 OS=Homo sapiens OX=9606 GN=SLC12A6 PE=1 SV=2	3	1.30465e-06	3.27876e-06	0.0474771	0.0327934	0.397909	-1.32949
ZFP91	Q96JP5	sp|Q96JP5|ZFP91_HUMAN E3 ubiquitin-protein ligase ZFP91 OS=Homo sapiens OX=9606 GN=ZFP91 PE=1 SV=1	1	5.88241e-06	3.06008e-08	0.0276721	0.0220468	192.23	7.58669
UBAC2	Q8NBM4	sp|Q8NBM4|UBAC2_HUMAN Ubiquitin-associated domain-containing protein 2 OS=Homo sapiens OX=9606 GN=UBAC2 PE=1 SV=1	1	6.88912e-06	3.06008e-08	0.00165003	0.00331068	225.129	7.81461
HERPUD1	Q15011	sp|Q15011|HERP1_HUMAN Homocysteine-responsive endoplasmic reticulum-resident ubiquitin-like domain member 1 protein OS=Homo sapiens OX=9606 GN=HERPUD1 PE=1 SV=1	1	2.20344e-08	6.04788e-06	0.00224491	0.00402824	0.00364333	-8.10053
B4GAT1	O43505	sp|O43505|B4GA1_HUMAN Beta-1,4-glucuronyltransferase 1 OS=Homo sapiens OX=9606 GN=B4GAT1 PE=1 SV=1	1	3.02489e-06	3.06008e-08	0.0217624	0.0184418	98.8501	6.62717
ERBB3	P21860	sp|P21860|ERBB3_HUMAN Receptor tyrosine-protein kinase erbB-3 OS=Homo sapiens OX=9606 GN=ERBB3 PE=1 SV=1	2	8.63736e-07	4.95951e-06	2.32409e-05	0.000353869	0.174158	-2.52154
SELENBP1	Q13228	sp|Q13228|SBP1_HUMAN Methanethiol oxidase OS=Homo sapiens OX=9606 GN=SELENBP1 PE=1 SV=2	2	2.99496e-06	1.91008e-06	0.00689605	0.00831152	1.56798	0.648909
RELA	Q04206	sp|Q04206|TF65_HUMAN Transcription factor p65 OS=Homo sapiens OX=9606 GN=RELA PE=1 SV=2	2	3.94739e-06	2.68472e-06	0.013811	0.0133895	1.47032	0.556126
TERF2	Q15554	sp|Q15554|TERF2_HUMAN Telomeric repeat-binding factor 2 OS=Homo sapiens OX=9606 GN=TERF2 PE=1 SV=3	2	2.37973e-06	1.89188e-06	0.0189868	0.0166772	1.25787	0.330981
PLA2G15	Q8NCC3	sp|Q8NCC3|PAG15_HUMAN Group XV phospholipase A2 OS=Homo sapiens OX=9606 GN=PLA2G15 PE=1 SV=2	2	1.43264e-06	2.75975e-06	0.00258967	0.00441324	0.519119	-0.945862
ZNF579	Q8NAF0	sp|Q8NAF0|ZN579_HUMAN Zinc finger protein 579 OS=Homo sapiens OX=9606 GN=ZNF579 PE=1 SV=2	1	3.88108e-06	3.06008e-08	0.000303407	0.00122807	126.829	6.98674
COG3	Q96JB2	sp|Q96JB2|COG3_HUMAN Conserved oligomeric Golgi complex subunit 3 OS=Homo sapiens OX=9606 GN=COG3 PE=1 SV=3	1	3.43481e-06	1.54239e-06	0.000890997	0.00224965	2.22693	1.15506
ECE1	P42892	sp|P42892|ECE1_HUMAN Endothelin-converting enzyme 1 OS=Homo sapiens OX=9606 GN=ECE1 PE=1 SV=2	2	2.48861e-07	5.01704e-06	0.00249538	0.00431184	0.0496031	-4.33342
GSPT1	P15170	sp|P15170|ERF3A_HUMAN Eukaryotic peptide chain release factor GTP-binding subunit ERF3A OS=Homo sapiens OX=9606 GN=GSPT1 PE=1 SV=1;sp|Q8IYD1|ERF3B_HUMAN Eukaryotic peptide chain release factor GTP-binding subunit ERF3B OS=Homo sapiens OX=9606 GN=GSPT2 PE=1	1	2.20344e-08	5.37018e-06	0.00130081	0.00286413	0.0041031	-7.92907
ATG9A	Q7Z3C6	sp|Q7Z3C6|ATG9A_HUMAN Autophagy-related protein 9A OS=Homo sapiens OX=9606 GN=ATG9A PE=1 SV=3	2	1.40383e-06	3.34907e-06	9.81864e-05	0.00067922	0.41917	-1.25439
MOCS3	O95396	sp|O95396|MOCS3_HUMAN Adenylyltransferase and sulfurtransferase MOCS3 OS=Homo sapiens OX=9606 GN=MOCS3 PE=1 SV=1	2	1.65927e-06	2.44928e-06	0.0371063	0.0273935	0.67745	-0.561813
IL2RG	P31785	sp|P31785|IL2RG_HUMAN Cytokine receptor common subunit gamma OS=Homo sapiens OX=9606 GN=IL2RG PE=1 SV=1	1	2.20344e-08	4.03197e-06	0.000535243	0.00167916	0.00546493	-7.51558
METTL15	A6NJ78	sp|A6NJ78|MET15_HUMAN Probable methyltransferase-like protein 15 OS=Homo sapiens OX=9606 GN=METTL15 PE=1 SV=1	1	7.06293e-07	3.33229e-06	0.0244504	0.0201249	0.211954	-2.23817
EIF2AK2	P19525	sp|P19525|E2AK2_HUMAN Interferon-induced, double-stranded RNA-activated protein kinase OS=Homo sapiens OX=9606 GN=EIF2AK2 PE=1 SV=2	2	3.29692e-06	4.37805e-07	0.00433762	0.00618931	7.53056	2.91276
ERCC3	P19447	sp|P19447|ERCC3_HUMAN General transcription and DNA repair factor IIH helicase subunit XPB OS=Homo sapiens OX=9606 GN=ERCC3 PE=1 SV=1	2	1.83341e-06	3.00193e-06	0.00476017	0.00654796	0.610742	-0.711364
EPS15L1	Q9UBC2	sp|Q9UBC2|EP15R_HUMAN Epidermal growth factor receptor substrate 15-like 1 OS=Homo sapiens OX=9606 GN=EPS15L1 PE=1 SV=1	2	2.92064e-06	1.22967e-06	0.000341474	0.00131391	2.37513	1.24801
YLPM1	P49750	sp|P49750|YLPM1_HUMAN YLP motif-containing protein 1 OS=Homo sapiens OX=9606 GN=YLPM1 PE=1 SV=4	1	2.44589e-06	1.40351e-06	0.00824193	0.00939538	1.74269	0.801318
TXNRD1	Q16881	sp|Q16881|TRXR1_HUMAN Thioredoxin reductase 1, cytoplasmic OS=Homo sapiens OX=9606 GN=TXNRD1 PE=1 SV=3	1	2.30506e-06	7.40189e-07	0.0232384	0.0193781	3.11415	1.63884
ALG8	Q9BVK2	sp|Q9BVK2|ALG8_HUMAN Probable dolichyl pyrophosphate Glc1Man9GlcNAc2 alpha-1,3-glucosyltransferase OS=Homo sapiens OX=9606 GN=ALG8 PE=1 SV=2	1	5.7097e-06	7.57594e-07	0.000880803	0.00223292	7.53662	2.91392
DSC1	Q08554	sp|Q08554|DSC1_HUMAN Desmocollin-1 OS=Homo sapiens OX=9606 GN=DSC1 PE=1 SV=2	2	2.20344e-08	3.06008e-08	0.00542946	0.00706608	0.72006	-0.473812
EIF2B4	Q9UI10	sp|Q9UI10|EI2BD_HUMAN Translation initiation factor eIF-2B subunit delta OS=Homo sapiens OX=9606 GN=EIF2B4 PE=1 SV=2	1	2.28066e-06	1.75305e-06	0.0481927	0.0331669	1.30097	0.379586
COL6A1	P12109	sp|P12109|CO6A1_HUMAN Collagen alpha-1(VI) chain OS=Homo sapiens OX=9606 GN=COL6A1 PE=1 SV=3	2	2.20344e-08	2.79085e-06	0.00157449	0.00322019	0.00789524	-6.9848
LDLR	P01130	sp|P01130|LDLR_HUMAN Low-density lipoprotein receptor OS=Homo sapiens OX=9606 GN=LDLR PE=1 SV=1	2	1.00212e-06	2.8227e-06	0.0246065	0.0202197	0.355021	-1.49402
ZC3H14	Q6PJT7	sp|Q6PJT7|ZC3HE_HUMAN Zinc finger CCCH domain-containing protein 14 OS=Homo sapiens OX=9606 GN=ZC3H14 PE=1 SV=1	2	1.06813e-06	2.60718e-06	0.0247052	0.0202794	0.409688	-1.2874
KIF23	Q02241	sp|Q02241|KIF23_HUMAN Kinesin-like protein KIF23 OS=Homo sapiens OX=9606 GN=KIF23 PE=1 SV=3	3	1.32443e-06	2.60474e-06	0.0192949	0.0168535	0.508468	-0.975771
DIMT1	Q9UNQ2	sp|Q9UNQ2|DIM1_HUMAN Probable dimethyladenosine transferase OS=Homo sapiens OX=9606 GN=DIMT1 PE=1 SV=1	2	2.27715e-06	5.52136e-07	0.0403682	0.0291229	4.12426	2.04413
BID	P55957	sp|P55957|BID_HUMAN BH3-interacting domain death agonist OS=Homo sapiens OX=9606 GN=BID PE=1 SV=1	1	4.60612e-06	3.25673e-07	0.00219204	0.00396556	14.1434	3.82206
XAB2	Q9HCS7	sp|Q9HCS7|SYF1_HUMAN Pre-mRNA-splicing factor SYF1 OS=Homo sapiens OX=9606 GN=XAB2 PE=1 SV=2	2	1.09714e-06	1.43361e-06	0.0187885	0.0165626	0.7653	-0.385902
ATRN	O75882	sp|O75882|ATRN_HUMAN Attractin OS=Homo sapiens OX=9606 GN=ATRN PE=1 SV=2	2	7.37022e-07	2.33326e-06	0.00197075	0.00369171	0.315877	-1.66257
WTAP	Q15007	sp|Q15007|FL2D_HUMAN Pre-mRNA-splicing regulator WTAP OS=Homo sapiens OX=9606 GN=WTAP PE=1 SV=2	1	2.7535e-06	4.25908e-07	0.00448033	0.00631339	6.46502	2.69265
ARFGEF2	Q9Y6D5	sp|Q9Y6D5|BIG2_HUMAN Brefeldin A-inhibited guanine nucleotide-exchange protein 2 OS=Homo sapiens OX=9606 GN=ARFGEF2 PE=1 SV=3	2	1.9223e-06	9.82141e-07	0.000558723	0.00171823	1.95726	0.968835
TAF2	Q6P1X5	sp|Q6P1X5|TAF2_HUMAN Transcription initiation factor TFIID subunit 2 OS=Homo sapiens OX=9606 GN=TAF2 PE=1 SV=3	3	3.37327e-06	8.73449e-07	0.00811315	0.00929268	3.86201	1.94935
SNAP29	O95721	sp|O95721|SNP29_HUMAN Synaptosomal-associated protein 29 OS=Homo sapiens OX=9606 GN=SNAP29 PE=1 SV=1	1	2.20344e-08	3.06008e-08	0.00542946	0.00706608	0.72006	-0.473812
ERC1	Q8IUD2	sp|Q8IUD2|RB6I2_HUMAN ELKS/Rab6-interacting/CAST family member 1 OS=Homo sapiens OX=9606 GN=ERC1 PE=1 SV=1	2	2.06289e-06	1.25853e-06	0.0400669	0.0289665	1.63913	0.712927
LAMB2	P55268	sp|P55268|LAMB2_HUMAN Laminin subunit beta-2 OS=Homo sapiens OX=9606 GN=LAMB2 PE=1 SV=2	5	9.52734e-07	2.20524e-06	0.00126155	0.00281148	0.432032	-1.21079
MMP15	P51511	sp|P51511|MMP15_HUMAN Matrix metalloproteinase-15 OS=Homo sapiens OX=9606 GN=MMP15 PE=1 SV=1	1	2.20344e-08	2.65472e-06	0.00295811	0.0048063	0.00830008	-6.91266
SH3YL1	Q96HL8	sp|Q96HL8|SH3Y1_HUMAN SH3 domain-containing YSC84-like protein 1 OS=Homo sapiens OX=9606 GN=SH3YL1 PE=1 SV=1	2	4.52452e-06	3.06008e-08	0.00199822	0.00372675	147.856	7.20805
SVIL	O95425	sp|O95425|SVIL_HUMAN Supervillin OS=Homo sapiens OX=9606 GN=SVIL PE=1 SV=2	3	1.027e-06	1.26466e-06	0.037573	0.0276459	0.812079	-0.300307
ABCF3	Q9NUQ8	sp|Q9NUQ8|ABCF3_HUMAN ATP-binding cassette sub-family F member 3 OS=Homo sapiens OX=9606 GN=ABCF3 PE=1 SV=2	2	2.61559e-06	1.37595e-07	7.62766e-05	0.000587368	19.0094	4.24864
PIGO	Q8TEQ8	sp|Q8TEQ8|PIGO_HUMAN GPI ethanolamine phosphate transferase 3 OS=Homo sapiens OX=9606 GN=PIGO PE=1 SV=3	2	1.77499e-06	8.05734e-07	0.000673736	0.00189419	2.20294	1.13943
HMGCS1	Q01581	sp|Q01581|HMCS1_HUMAN Hydroxymethylglutaryl-CoA synthase, cytoplasmic OS=Homo sapiens OX=9606 GN=HMGCS1 PE=1 SV=2	2	2.20344e-08	2.89333e-06	0.00374512	0.00563886	0.00761559	-7.03683
DHX16	O60231	sp|O60231|DHX16_HUMAN Pre-mRNA-splicing factor ATP-dependent RNA helicase DHX16 OS=Homo sapiens OX=9606 GN=DHX16 PE=1 SV=2	2	1.78365e-06	2.56087e-07	0.00368229	0.0055769	6.96504	2.80013
PTPRK	Q15262	sp|Q15262|PTPRK_HUMAN Receptor-type tyrosine-protein phosphatase kappa OS=Homo sapiens OX=9606 GN=PTPRK PE=1 SV=2	1	2.20344e-08	2.24315e-06	0.00177706	0.00345604	0.009823	-6.66962
PPME1	Q9Y570	sp|Q9Y570|PPME1_HUMAN Protein phosphatase methylesterase 1 OS=Homo sapiens OX=9606 GN=PPME1 PE=1 SV=3	2	2.20344e-08	3.06008e-08	0.00542946	0.00706608	0.72006	-0.473812
CDH16	O75309	sp|O75309|CAD16_HUMAN Cadherin-16 OS=Homo sapiens OX=9606 GN=CDH16 PE=2 SV=1	2	2.20344e-08	1.7455e-06	0.0495871	0.0338871	0.0126236	-6.30774
TTC19	Q6DKK2	sp|Q6DKK2|TTC19_HUMAN Tetratricopeptide repeat protein 19, mitochondrial OS=Homo sapiens OX=9606 GN=TTC19 PE=1 SV=4	2	2.20344e-08	3.32539e-06	0.00316074	0.005033	0.00662612	-7.23762
BAZ2A	Q9UIF9	sp|Q9UIF9|BAZ2A_HUMAN Bromodomain adjacent to zinc finger domain protein 2A OS=Homo sapiens OX=9606 GN=BAZ2A PE=1 SV=4	1	2.20344e-08	1.30325e-06	0.00112072	0.00261409	0.0169073	-5.88621
ADGRG6	Q86SQ4	sp|Q86SQ4|AGRG6_HUMAN Adhesion G-protein coupled receptor G6 OS=Homo sapiens OX=9606 GN=ADGRG6 PE=1 SV=3	2	8.03231e-07	1.07006e-06	0.031481	0.0242655	0.750644	-0.413799
EP300	Q09472	sp|Q09472|EP300_HUMAN Histone acetyltransferase p300 OS=Homo sapiens OX=9606 GN=EP300 PE=1 SV=2;sp|Q92793|CBP_HUMAN CREB-binding protein OS=Homo sapiens OX=9606 GN=CREBBP PE=1 SV=3	3	1.90531e-07	2.16054e-06	0.000492867	0.0016073	0.0881868	-3.50329
PPFIBP2	Q8ND30	sp|Q8ND30|LIPB2_HUMAN Liprin-beta-2 OS=Homo sapiens OX=9606 GN=PPFIBP2 PE=1 SV=3;sp|Q86W92|LIPB1_HUMAN Liprin-beta-1 OS=Homo sapiens OX=9606 GN=PPFIBP1 PE=1 SV=2	1	2.36178e-06	1.50757e-07	0.000465236	0.00155731	15.6661	3.96957
CLUH	O75153	sp|O75153|CLU_HUMAN Clustered mitochondria protein homolog OS=Homo sapiens OX=9606 GN=CLUH PE=1 SV=2	2	1.05051e-06	6.92779e-07	0.0342788	0.0258278	1.51637	0.600621
TGFBI	Q15582	sp|Q15582|BGH3_HUMAN Transforming growth factor-beta-induced protein ig-h3 OS=Homo sapiens OX=9606 GN=TGFBI PE=1 SV=1	2	2.20344e-08	3.06008e-08	0.00542946	0.00706608	0.72006	-0.473812
PPP6R3	Q5H9R7	sp|Q5H9R7|PP6R3_HUMAN Serine/threonine-protein phosphatase 6 regulatory subunit 3 OS=Homo sapiens OX=9606 GN=PPP6R3 PE=1 SV=2	1	2.47175e-06	3.06008e-08	0.0163564	0.0150874	80.7741	6.33582
PTPRF	P10586	sp|P10586|PTPRF_HUMAN Receptor-type tyrosine-protein phosphatase F OS=Homo sapiens OX=9606 GN=PTPRF PE=1 SV=2	3	6.94707e-08	8.94383e-07	0.0264661	0.0213249	0.0776744	-3.68642
CUBN	O60494	sp|O60494|CUBN_HUMAN Cubilin OS=Homo sapiens OX=9606 GN=CUBN PE=1 SV=5	2	2.20344e-08	1.34479e-06	0.00242255	0.00423157	0.0163851	-5.93148
CBLC	Q9ULV8	sp|Q9ULV8|CBLC_HUMAN E3 ubiquitin-protein ligase CBL-C OS=Homo sapiens OX=9606 GN=CBLC PE=1 SV=3	1	9.94263e-07	5.40315e-07	0.0192731	0.0168411	1.84015	0.879827
MDC1	Q14676	sp|Q14676|MDC1_HUMAN Mediator of DNA damage checkpoint protein 1 OS=Homo sapiens OX=9606 GN=MDC1 PE=1 SV=3	3	1.24561e-06	3.03906e-07	0.0090025	0.00998657	4.09866	2.03515
SPTBN4	Q9H254	sp|Q9H254|SPTN4_HUMAN Spectrin beta chain, non-erythrocytic 4 OS=Homo sapiens OX=9606 GN=SPTBN4 PE=1 SV=2	2	1.38858e-07	6.49674e-07	0.0459995	0.0320134	0.213734	-2.22611
GTF3C1	Q12789	sp|Q12789|TF3C1_HUMAN General transcription factor 3C polypeptide 1 OS=Homo sapiens OX=9606 GN=GTF3C1 PE=1 SV=4	3	2.62878e-07	7.54287e-07	0.0416258	0.0297689	0.348512	-1.52072
SYNE1	Q8NF91	sp|Q8NF91|SYNE1_HUMAN Nesprin-1 OS=Homo sapiens OX=9606 GN=SYNE1 PE=1 SV=4	2	2.17845e-07	6.29737e-07	5.95039e-06	0.000203422	0.34593	-1.53145
TTN	Q8WZ42	sp|Q8WZ42|TITIN_HUMAN Titin OS=Homo sapiens OX=9606 GN=TTN PE=1 SV=4	5	3.39143e-07	1.73253e-07	0.037815	0.027776	1.9575	0.969013
TRRAP	Q9Y4A5	sp|Q9Y4A5|TRRAP_HUMAN Transformation/transcription domain-associated protein OS=Homo sapiens OX=9606 GN=TRRAP PE=1 SV=3	3	2.20344e-08	1.05402e-07	0.0142688	0.0137075	0.209052	-2.25807
DST	Q03001	sp|Q03001|DYST_HUMAN Dystonin OS=Homo sapiens OX=9606 GN=DST PE=1 SV=4	2	2.20344e-08	4.07397e-07	0.0328388	0.0250219	0.0540859	-4.2086
PTPRA	P18433	sp|P18433|PTPRA_HUMAN Receptor-type tyrosine-protein phosphatase alpha OS=Homo sapiens OX=9606 GN=PTPRA PE=1 SV=3	2	2.20344e-08	3.06008e-08	0.00542946	0.00706608	0.72006	-0.473812
ZMYM3	Q14202	sp|Q14202|ZMYM3_HUMAN Zinc finger MYM-type protein 3 OS=Homo sapiens OX=9606 GN=ZMYM3 PE=1 SV=2	2	2.20344e-08	3.06008e-08	0.00542946	0.00706608	0.72006	-0.473812

## Sheet: KAM+DON Vs control
Gene	Accession	Description	Unique peptides	MEAN D	MEAN A	P-VALUE	Q-VALUE	FOLD CHANGE	LOG_FOLDCHANGE
HIST2H2AC	Q16777	sp|Q16777|H2A2C_HUMAN Histone H2A type 2-C OS=Homo sapiens OX=9606 GN=HIST2H2AC PE=1 SV=4;sp|Q6FI13|H2A2A_HUMAN Histone H2A type 2-A OS=Homo sapiens OX=9606 GN=HIST2H2AA3 PE=1 SV=3	1	0.0701471	0.0542162	0.00215189	0.00473833	1.29384	0.371658
HSPE1	P61604	sp|P61604|CH10_HUMAN 10 kDa heat shock protein, mitochondrial OS=Homo sapiens OX=9606 GN=HSPE1 PE=1 SV=2	11	0.00670644	0.00998628	0.0370216	0.0323516	0.671566	-0.574399
RPS27A	P62979	sp|P62979|RS27A_HUMAN Ubiquitin-40S ribosomal protein S27a OS=Homo sapiens OX=9606 GN=RPS27A PE=1 SV=2;sp|P62987|RL40_HUMAN Ubiquitin-60S ribosomal protein L40 OS=Homo sapiens OX=9606 GN=UBA52 PE=1 SV=2;sp|P0CG47|UBB_HUMAN Polyubiquitin-B OS=Homo sapiens O	6	0.0053343	0.00662347	0.00119042	0.0034057	0.805363	-0.312289
KRT18	P05783	sp|P05783|K1C18_HUMAN Keratin, type I cytoskeletal 18 OS=Homo sapiens OX=9606 GN=KRT18 PE=1 SV=2	23	0.0046442	0.00343884	0.00126965	0.00352035	1.35051	0.433507
AGR2	O95994	sp|O95994|AGR2_HUMAN Anterior gradient protein 2 homolog OS=Homo sapiens OX=9606 GN=AGR2 PE=1 SV=1	6	0.00377787	0.00553182	1.20835e-05	0.000334721	0.682934	-0.550181
H3F3A	P84243	sp|P84243|H33_HUMAN Histone H3.3 OS=Homo sapiens OX=9606 GN=H3F3A PE=1 SV=2	1	0.00773371	0.00274902	0.00647148	0.00978222	2.81326	1.49224
H2AFV	Q71UI9	sp|Q71UI9|H2AV_HUMAN Histone H2A.V OS=Homo sapiens OX=9606 GN=H2AFV PE=1 SV=3;sp|P0C0S5|H2AZ_HUMAN Histone H2A.Z OS=Homo sapiens OX=9606 GN=H2AFZ PE=1 SV=2	3	0.00575461	0.00312305	1.58915e-05	0.000381476	1.84263	0.881763
MDH2	P40926	sp|P40926|MDHM_HUMAN Malate dehydrogenase, mitochondrial OS=Homo sapiens OX=9606 GN=MDH2 PE=1 SV=3	19	0.00407933	0.00507196	0.000430669	0.00191594	0.804291	-0.31421
LGALS3	P17931	sp|P17931|LEG3_HUMAN Galectin-3 OS=Homo sapiens OX=9606 GN=LGALS3 PE=1 SV=5	12	0.00378545	0.00283736	0.00092073	0.00296377	1.33414	0.415915
RPLP1	P05386	sp|P05386|RLA1_HUMAN 60S acidic ribosomal protein P1 OS=Homo sapiens OX=9606 GN=RPLP1 PE=1 SV=1	3	0.00364568	0.00295391	0.00974819	0.013197	1.23419	0.303562
PDIA3	P30101	sp|P30101|PDIA3_HUMAN Protein disulfide-isomerase A3 OS=Homo sapiens OX=9606 GN=PDIA3 PE=1 SV=4	30	0.00218388	0.00319644	0.000130151	0.000991669	0.683223	-0.549572
PDIA6	Q15084	sp|Q15084|PDIA6_HUMAN Protein disulfide-isomerase A6 OS=Homo sapiens OX=9606 GN=PDIA6 PE=1 SV=1	17	0.00249191	0.00305741	0.0051422	0.00837019	0.815038	-0.295061
ETFB	P38117	sp|P38117|ETFB_HUMAN Electron transfer flavoprotein subunit beta OS=Homo sapiens OX=9606 GN=ETFB PE=1 SV=3	16	0.00215634	0.00297059	0.0186261	0.0199098	0.725896	-0.462165
ATP5ME	P56385	sp|P56385|ATP5I_HUMAN ATP synthase subunit e, mitochondrial OS=Homo sapiens OX=9606 GN=ATP5ME PE=1 SV=2	3	0.00283718	0.00235274	0.000308601	0.00160362	1.20591	0.270119
HMGN2	P05204	sp|P05204|HMGN2_HUMAN Non-histone chromosomal protein HMG-17 OS=Homo sapiens OX=9606 GN=HMGN2 PE=1 SV=3;sp|Q15651|HMGN3_HUMAN High mobility group nucleosome-binding domain-containing protein 3 OS=Homo sapiens OX=9606 GN=HMGN3 PE=1 SV=2	4	0.00153457	0.00372905	0.00669962	0.0100342	0.411519	-1.28097
RPN2	P04844	sp|P04844|RPN2_HUMAN Dolichyl-diphosphooligosaccharide--protein glycosyltransferase subunit 2 OS=Homo sapiens OX=9606 GN=RPN2 PE=1 SV=3	24	0.00275552	0.00186946	0.00116229	0.00336323	1.47397	0.559705
ENO1	P06733	sp|P06733|ENOA_HUMAN Alpha-enolase OS=Homo sapiens OX=9606 GN=ENO1 PE=1 SV=2	18	0.00186531	0.00239311	0.00305594	0.00595439	0.779452	-0.359468
S100A6	P06703	sp|P06703|S10A6_HUMAN Protein S100-A6 OS=Homo sapiens OX=9606 GN=S100A6 PE=1 SV=1	5	0.0018209	0.00241756	0.00159929	0.00397391	0.753196	-0.408903
TUBB4B	P68371	sp|P68371|TBB4B_HUMAN Tubulin beta-4B chain OS=Homo sapiens OX=9606 GN=TUBB4B PE=1 SV=1;sp|P04350|TBB4A_HUMAN Tubulin beta-4A chain OS=Homo sapiens OX=9606 GN=TUBB4A PE=1 SV=2	3	0.00238429	0.00142355	0.0268923	0.025784	1.67489	0.744067
HSPA5	P11021	sp|P11021|BIP_HUMAN Endoplasmic reticulum chaperone BiP OS=Homo sapiens OX=9606 GN=HSPA5 PE=1 SV=2	28	0.00163985	0.00240774	0.00172893	0.00415352	0.681077	-0.554111
TPI1	P60174	sp|P60174|TPIS_HUMAN Triosephosphate isomerase OS=Homo sapiens OX=9606 GN=TPI1 PE=1 SV=3	19	0.00152012	0.00191029	0.033625	0.0301519	0.795753	-0.329607
PPIB	P23284	sp|P23284|PPIB_HUMAN Peptidyl-prolyl cis-trans isomerase B OS=Homo sapiens OX=9606 GN=PPIB PE=1 SV=2	13	0.00141699	0.00185302	0.0196336	0.0205211	0.764695	-0.387043
S100A10	P60903	sp|P60903|S10AA_HUMAN Protein S100-A10 OS=Homo sapiens OX=9606 GN=S100A10 PE=1 SV=2	4	0.00189839	0.0011603	0.00146555	0.00377562	1.63612	0.71028
MARCKS	P29966	sp|P29966|MARCS_HUMAN Myristoylated alanine-rich C-kinase substrate OS=Homo sapiens OX=9606 GN=MARCKS PE=1 SV=4	11	0.00167549	0.00206704	0.0157391	0.01802	0.810577	-0.302979
GSTA2	P09210	sp|P09210|GSTA2_HUMAN Glutathione S-transferase A2 OS=Homo sapiens OX=9606 GN=GSTA2 PE=1 SV=4;sp|P08263|GSTA1_HUMAN Glutathione S-transferase A1 OS=Homo sapiens OX=9606 GN=GSTA1 PE=1 SV=3;sp|Q16772|GSTA3_HUMAN Glutathione S-transferase A3 OS=Homo sapiens O	12	0.00118358	0.00144799	0.00692403	0.0102817	0.817398	-0.29089
CTSD	P07339	sp|P07339|CATD_HUMAN Cathepsin D OS=Homo sapiens OX=9606 GN=CTSD PE=1 SV=1	14	0.00144092	0.00193645	0.000426816	0.00190619	0.744104	-0.426423
PGRMC1	O00264	sp|O00264|PGRC1_HUMAN Membrane-associated progesterone receptor component 1 OS=Homo sapiens OX=9606 GN=PGRMC1 PE=1 SV=3	9	0.00200559	0.001614	0.0107391	0.0141127	1.24263	0.313393
RPL22	P35268	sp|P35268|RL22_HUMAN 60S ribosomal protein L22 OS=Homo sapiens OX=9606 GN=RPL22 PE=1 SV=2	3	0.00180233	0.00135935	0.0112649	0.0145771	1.32588	0.406947
CALR	P27797	sp|P27797|CALR_HUMAN Calreticulin OS=Homo sapiens OX=9606 GN=CALR PE=1 SV=1	18	0.00090689	0.00190534	0.000743284	0.0026262	0.475973	-1.07105
FABP1	P07148	sp|P07148|FABPL_HUMAN Fatty acid-binding protein, liver OS=Homo sapiens OX=9606 GN=FABP1 PE=1 SV=1	6	0.00103838	0.00146958	1.8764e-05	0.000409245	0.706581	-0.501074
RPLP0	P05388	sp|P05388|RLA0_HUMAN 60S acidic ribosomal protein P0 OS=Homo sapiens OX=9606 GN=RPLP0 PE=1 SV=1;sp|Q8NHW5|RLA0L_HUMAN 60S acidic ribosomal protein P0-like OS=Homo sapiens OX=9606 GN=RPLP0P6 PE=5 SV=1	10	0.00174927	0.00129079	0.000194912	0.00126651	1.3552	0.438503
HSP90B1	P14625	sp|P14625|ENPL_HUMAN Endoplasmin OS=Homo sapiens OX=9606 GN=HSP90B1 PE=1 SV=1	39	0.00110681	0.00156911	3.71911e-05	0.000523923	0.705374	-0.50354
HMGB1	P09429	sp|P09429|HMGB1_HUMAN High mobility group protein B1 OS=Homo sapiens OX=9606 GN=HMGB1 PE=1 SV=3	8	0.00119521	0.000836179	0.011248	0.0145624	1.42937	0.515379
HSPA9	P38646	sp|P38646|GRP75_HUMAN Stress-70 protein, mitochondrial OS=Homo sapiens OX=9606 GN=HSPA9 PE=1 SV=2	36	0.00121838	0.00171745	0.000182987	0.00122135	0.709413	-0.495303
P4HB	P07237	sp|P07237|PDIA1_HUMAN Protein disulfide-isomerase OS=Homo sapiens OX=9606 GN=P4HB PE=1 SV=3	30	0.000999035	0.00159669	2.97311e-07	6.65907e-05	0.625692	-0.676475
RPS14	P62263	sp|P62263|RS14_HUMAN 40S ribosomal protein S14 OS=Homo sapiens OX=9606 GN=RPS14 PE=1 SV=3	5	0.00136331	0.00111931	0.000593396	0.00228508	1.21799	0.284499
SUCLG1	P53597	sp|P53597|SUCA_HUMAN Succinate--CoA ligase [ADP/GDP-forming] subunit alpha, mitochondrial OS=Homo sapiens OX=9606 GN=SUCLG1 PE=1 SV=4	10	0.00114575	0.00166982	0.000334769	0.0016643	0.686154	-0.543396
H2AFY	O75367	sp|O75367|H2AY_HUMAN Core histone macro-H2A.1 OS=Homo sapiens OX=9606 GN=H2AFY PE=1 SV=4	15	0.00138573	0.00105986	2.06624e-05	0.000426139	1.30746	0.386769
PTMA	P06454	sp|P06454|PTMA_HUMAN Prothymosin alpha OS=Homo sapiens OX=9606 GN=PTMA PE=1 SV=2	4	0.00102696	0.00188714	0.000466141	0.00200226	0.544189	-0.877822
LMNB1	P20700	sp|P20700|LMNB1_HUMAN Lamin-B1 OS=Homo sapiens OX=9606 GN=LMNB1 PE=1 SV=2	35	0.00148125	0.00114987	0.000898117	0.00292412	1.28818	0.365339
COX6C	P09669	sp|P09669|COX6C_HUMAN Cytochrome c oxidase subunit 6C OS=Homo sapiens OX=9606 GN=COX6C PE=1 SV=2	7	0.00102193	0.00130392	0.013259	0.0162162	0.783733	-0.351567
ACAA1	P09110	sp|P09110|THIK_HUMAN 3-ketoacyl-CoA thiolase, peroxisomal OS=Homo sapiens OX=9606 GN=ACAA1 PE=1 SV=2	18	0.00128554	0.00104484	0.0470474	0.0384444	1.23037	0.299094
ATP5MF	P56134	sp|P56134|ATPK_HUMAN ATP synthase subunit f, mitochondrial OS=Homo sapiens OX=9606 GN=ATP5MF PE=1 SV=3	4	0.00156247	0.00107009	0.0133083	0.0162545	1.46014	0.546102
COX6B1	P14854	sp|P14854|CX6B1_HUMAN Cytochrome c oxidase subunit 6B1 OS=Homo sapiens OX=9606 GN=COX6B1 PE=1 SV=2	8	0.00106363	0.00161498	0.000895891	0.00292017	0.658602	-0.60252
BANF1	O75531	sp|O75531|BAF_HUMAN Barrier-to-autointegration factor OS=Homo sapiens OX=9606 GN=BANF1 PE=1 SV=1	4	0.00142714	0.000886507	4.06877e-05	0.0005404	1.60985	0.686925
MTCH2	Q9Y6C9	sp|Q9Y6C9|MTCH2_HUMAN Mitochondrial carrier homolog 2 OS=Homo sapiens OX=9606 GN=MTCH2 PE=1 SV=1	11	0.00127057	0.000806988	0.00259249	0.00533303	1.57446	0.654854
MAL2	Q969L2	sp|Q969L2|MAL2_HUMAN Protein MAL2 OS=Homo sapiens OX=9606 GN=MAL2 PE=1 SV=1	2	0.00136268	0.00102739	0.019632	0.0205201	1.32635	0.407463
MYL6	P60660	sp|P60660|MYL6_HUMAN Myosin light polypeptide 6 OS=Homo sapiens OX=9606 GN=MYL6 PE=1 SV=2	7	0.00119871	0.000974237	0.00935644	0.0128196	1.2304	0.299132
ACTC1	P68032	sp|P68032|ACTC_HUMAN Actin, alpha cardiac muscle 1 OS=Homo sapiens OX=9606 GN=ACTC1 PE=1 SV=1;sp|P63267|ACTH_HUMAN Actin, gamma-enteric smooth muscle OS=Homo sapiens OX=9606 GN=ACTG2 PE=1 SV=1;sp|P62736|ACTA_HUMAN Actin, aortic smooth muscle OS=Homo sapien	1	0.00130492	0.000650371	0.000742374	0.0026243	2.00642	1.00462
CYB5B	O43169	sp|O43169|CYB5B_HUMAN Cytochrome b5 type B OS=Homo sapiens OX=9606 GN=CYB5B PE=1 SV=2	7	0.00116607	0.000944603	0.00635823	0.0096652	1.23445	0.303868
CES1	P23141	sp|P23141|EST1_HUMAN Liver carboxylesterase 1 OS=Homo sapiens OX=9606 GN=CES1 PE=1 SV=2	27	0.000881931	0.00130534	7.36359e-06	0.000264921	0.675634	-0.565686
SUCLG2	Q96I99	sp|Q96I99|SUCB2_HUMAN Succinate--CoA ligase [GDP-forming] subunit beta, mitochondrial OS=Homo sapiens OX=9606 GN=SUCLG2 PE=1 SV=2	22	0.00104974	0.00132847	0.00430139	0.00747176	0.790187	-0.339734
SUB1	P53999	sp|P53999|TCP4_HUMAN Activated RNA polymerase II transcriptional coactivator p15 OS=Homo sapiens OX=9606 GN=SUB1 PE=1 SV=3	6	0.00115438	0.000887101	6.85944e-05	0.000664041	1.3013	0.379952
CDC42	P60953	sp|P60953|CDC42_HUMAN Cell division control protein 42 homolog OS=Homo sapiens OX=9606 GN=CDC42 PE=1 SV=2	7	0.000848731	0.00123621	0.000955172	0.00302245	0.686558	-0.542548
CHCHD2	Q9Y6H1	sp|Q9Y6H1|CHCH2_HUMAN Coiled-coil-helix-coiled-coil-helix domain-containing protein 2 OS=Homo sapiens OX=9606 GN=CHCHD2 PE=1 SV=1;sp|Q5T1J5|CHCH9_HUMAN Putative coiled-coil-helix-coiled-coil-helix domain-containing protein CHCHD2P9, mitochondrial OS=Homo s	5	0.000498798	0.00184114	1.30588e-06	9.96844e-05	0.270917	-1.88408
SFXN1	Q9H9B4	sp|Q9H9B4|SFXN1_HUMAN Sideroflexin-1 OS=Homo sapiens OX=9606 GN=SFXN1 PE=1 SV=4	13	0.0010265	0.000848506	0.00499673	0.00822293	1.20977	0.274738
PRDX3	P30048	sp|P30048|PRDX3_HUMAN Thioredoxin-dependent peroxide reductase, mitochondrial OS=Homo sapiens OX=9606 GN=PRDX3 PE=1 SV=3	11	0.000739245	0.00112834	0.000113048	0.000903059	0.655161	-0.610078
ALDOA	P04075	sp|P04075|ALDOA_HUMAN Fructose-bisphosphate aldolase A OS=Homo sapiens OX=9606 GN=ALDOA PE=1 SV=2	17	0.0006536	0.000963283	9.64891e-05	0.000810096	0.678512	-0.559553
SERPINH1	P50454	sp|P50454|SERPH_HUMAN Serpin H1 OS=Homo sapiens OX=9606 GN=SERPINH1 PE=1 SV=2	21	0.000695268	0.000869304	0.00714737	0.0105285	0.799798	-0.322293
PDIA4	P13667	sp|P13667|PDIA4_HUMAN Protein disulfide-isomerase A4 OS=Homo sapiens OX=9606 GN=PDIA4 PE=1 SV=2	33	0.000718819	0.00110805	0.00264881	0.00540493	0.648727	-0.624317
PRKCSH	P14314	sp|P14314|GLU2B_HUMAN Glucosidase 2 subunit beta OS=Homo sapiens OX=9606 GN=PRKCSH PE=1 SV=2	13	0.000726451	0.00107478	0.000572817	0.00223339	0.675906	-0.565106
ATP5PB	P24539	sp|P24539|AT5F1_HUMAN ATP synthase F(0) complex subunit B1, mitochondrial OS=Homo sapiens OX=9606 GN=ATP5PB PE=1 SV=2	9	0.00079295	0.00102556	0.00137314	0.00365987	0.77319	-0.371104
ACSF2	Q96CM8	sp|Q96CM8|ACSF2_HUMAN Acyl-CoA synthetase family member 2, mitochondrial OS=Homo sapiens OX=9606 GN=ACSF2 PE=1 SV=2	19	0.000762735	0.0011265	0.000881914	0.00289516	0.677083	-0.562596
ANXA5	P08758	sp|P08758|ANXA5_HUMAN Annexin A5 OS=Homo sapiens OX=9606 GN=ANXA5 PE=1 SV=2	18	0.000960515	0.000717595	0.0368643	0.0322493	1.33852	0.420637
HMGCS2	P54868	sp|P54868|HMCS2_HUMAN Hydroxymethylglutaryl-CoA synthase, mitochondrial OS=Homo sapiens OX=9606 GN=HMGCS2 PE=1 SV=1	18	0.000843412	0.00103822	0.00157811	0.00394338	0.812368	-0.299795
FN1	P02751	sp|P02751|FINC_HUMAN Fibronectin OS=Homo sapiens OX=9606 GN=FN1 PE=1 SV=4	64	0.000268661	0.000580557	4.37009e-05	0.000553158	0.462764	-1.11165
RPS25	P62851	sp|P62851|RS25_HUMAN 40S ribosomal protein S25 OS=Homo sapiens OX=9606 GN=RPS25 PE=1 SV=1	4	0.000927612	0.000685527	0.000458058	0.00198311	1.35314	0.436308
RPL7	P18124	sp|P18124|RL7_HUMAN 60S ribosomal protein L7 OS=Homo sapiens OX=9606 GN=RPL7 PE=1 SV=1	13	0.000899586	0.000722499	0.000543883	0.00217209	1.2451	0.316265
OAT	P04181	sp|P04181|OAT_HUMAN Ornithine aminotransferase, mitochondrial OS=Homo sapiens OX=9606 GN=OAT PE=1 SV=1	17	0.000603754	0.00109156	0.000228318	0.00138117	0.553112	-0.854356
DLD	P09622	sp|P09622|DLDH_HUMAN Dihydrolipoyl dehydrogenase, mitochondrial OS=Homo sapiens OX=9606 GN=DLD PE=1 SV=2	14	0.000788908	0.000995057	0.00195404	0.00446399	0.792827	-0.334923
GSTK1	Q9Y2Q3	sp|Q9Y2Q3|GSTK1_HUMAN Glutathione S-transferase kappa 1 OS=Homo sapiens OX=9606 GN=GSTK1 PE=1 SV=3	11	0.000775361	0.000964383	0.000464943	0.00199944	0.803998	-0.314737
NDUFAF2	Q8N183	sp|Q8N183|NDUF2_HUMAN NADH dehydrogenase [ubiquinone] 1 alpha subcomplex assembly factor 2 OS=Homo sapiens OX=9606 GN=NDUFAF2 PE=1 SV=1	5	0.000659123	0.000991114	0.00553631	0.00879767	0.665033	-0.588502
HMGA1	P17096	sp|P17096|HMGA1_HUMAN High mobility group protein HMG-I/HMG-Y OS=Homo sapiens OX=9606 GN=HMGA1 PE=1 SV=3	7	0.000962831	0.000618575	2.96765e-05	0.000486423	1.55653	0.638333
RPS8	P62241	sp|P62241|RS8_HUMAN 40S ribosomal protein S8 OS=Homo sapiens OX=9606 GN=RPS8 PE=1 SV=2	7	0.000908731	0.00070095	0.000146833	0.00107055	1.29643	0.374542
ERO1A	Q96HE7	sp|Q96HE7|ERO1A_HUMAN ERO1-like protein alpha OS=Homo sapiens OX=9606 GN=ERO1A PE=1 SV=2	17	0.000656675	0.000920014	0.000410942	0.00186521	0.713766	-0.486477
CTSB	P07858	sp|P07858|CATB_HUMAN Cathepsin B OS=Homo sapiens OX=9606 GN=CTSB PE=1 SV=3	9	0.000579789	0.000943194	0.0101679	0.0135915	0.614708	-0.702027
SNU13	P55769	sp|P55769|NH2L1_HUMAN NHP2-like protein 1 OS=Homo sapiens OX=9606 GN=SNU13 PE=1 SV=3	7	0.000858522	0.000713538	0.00140389	0.00369927	1.20319	0.266864
RPL13	P26373	sp|P26373|RL13_HUMAN 60S ribosomal protein L13 OS=Homo sapiens OX=9606 GN=RPL13 PE=1 SV=4	7	0.000828394	0.000592863	0.00515501	0.00838301	1.39728	0.482618
METTL7B	Q6UX53	sp|Q6UX53|MET7B_HUMAN Methyltransferase-like protein 7B OS=Homo sapiens OX=9606 GN=METTL7B PE=1 SV=2	7	0.000794786	0.000635483	0.0231041	0.0230796	1.25068	0.322712
APEX1	P27695	sp|P27695|APEX1_HUMAN DNA-(apurinic or apyrimidinic site) lyase OS=Homo sapiens OX=9606 GN=APEX1 PE=1 SV=2	14	0.000875807	0.000623054	0.000148232	0.00107686	1.40567	0.491257
ALDH18A1	P54886	sp|P54886|P5CS_HUMAN Delta-1-pyrroline-5-carboxylate synthase OS=Homo sapiens OX=9606 GN=ALDH18A1 PE=1 SV=2	40	0.000545133	0.000882046	4.79211e-05	0.000571167	0.618032	-0.694247
ECI1	P42126	sp|P42126|ECI1_HUMAN Enoyl-CoA delta isomerase 1, mitochondrial OS=Homo sapiens OX=9606 GN=ECI1 PE=1 SV=1	9	0.000673172	0.000851344	5.16404e-06	0.000226617	0.790717	-0.338766
MIC13	Q5XKP0	sp|Q5XKP0|MIC13_HUMAN MICOS complex subunit MIC13 OS=Homo sapiens OX=9606 GN=MIC13 PE=1 SV=1	4	0.000940645	0.000658452	0.0132806	0.016233	1.42857	0.514571
BCAP31	P51572	sp|P51572|BAP31_HUMAN B-cell receptor-associated protein 31 OS=Homo sapiens OX=9606 GN=BCAP31 PE=1 SV=3	13	0.000497971	0.00087384	0.000457298	0.0019813	0.569865	-0.811308
HMGA2	P52926	sp|P52926|HMGA2_HUMAN High mobility group protein HMGI-C OS=Homo sapiens OX=9606 GN=HMGA2 PE=1 SV=1	5	0.000544849	0.000869444	0.000890601	0.00291075	0.626664	-0.674236
TMEM256	Q8N2U0	sp|Q8N2U0|TM256_HUMAN Transmembrane protein 256 OS=Homo sapiens OX=9606 GN=TMEM256 PE=3 SV=1	3	0.000890057	0.000562015	0.000730486	0.00259928	1.58369	0.663289
PLIN2	Q99541	sp|Q99541|PLIN2_HUMAN Perilipin-2 OS=Homo sapiens OX=9606 GN=PLIN2 PE=1 SV=2	19	0.000851105	0.000586856	0.0331185	0.0298409	1.45028	0.536331
SFPQ	P23246	sp|P23246|SFPQ_HUMAN Splicing factor, proline- and glutamine-rich OS=Homo sapiens OX=9606 GN=SFPQ PE=1 SV=2	22	0.00073428	0.000554843	0.0315045	0.0288295	1.3234	0.404251
RPL23	P62829	sp|P62829|RL23_HUMAN 60S ribosomal protein L23 OS=Homo sapiens OX=9606 GN=RPL23 PE=1 SV=1	5	0.000774987	0.000596108	0.0017246	0.0041477	1.30008	0.378599
RPL8	P62917	sp|P62917|RL8_HUMAN 60S ribosomal protein L8 OS=Homo sapiens OX=9606 GN=RPL8 PE=1 SV=2	6	0.000865194	0.000539733	0.000219398	0.00135213	1.603	0.680778
RPL23A	P62750	sp|P62750|RL23A_HUMAN 60S ribosomal protein L23a OS=Homo sapiens OX=9606 GN=RPL23A PE=1 SV=1	6	0.000645773	0.000491141	0.0298539	0.0277621	1.31484	0.39489
S100A1	P23297	sp|P23297|S10A1_HUMAN Protein S100-A1 OS=Homo sapiens OX=9606 GN=S100A1 PE=1 SV=2	3	0.000925206	0.000315157	0.00135619	0.00363776	2.9357	1.5537
RALB	P11234	sp|P11234|RALB_HUMAN Ras-related protein Ral-B OS=Homo sapiens OX=9606 GN=RALB PE=1 SV=1	8	0.000555212	0.00072083	0.00095255	0.00301805	0.770241	-0.376619
UQCRQ	O14949	sp|O14949|QCR8_HUMAN Cytochrome b-c1 complex subunit 8 OS=Homo sapiens OX=9606 GN=UQCRQ PE=1 SV=4	6	0.000522404	0.000713807	0.000475476	0.00202399	0.731856	-0.450369
HNRNPA1	P09651	sp|P09651|ROA1_HUMAN Heterogeneous nuclear ribonucleoprotein A1 OS=Homo sapiens OX=9606 GN=HNRNPA1 PE=1 SV=5;sp|Q32P51|RA1L2_HUMAN Heterogeneous nuclear ribonucleoprotein A1-like 2 OS=Homo sapiens OX=9606 GN=HNRNPA1L2 PE=2 SV=2	13	0.000744758	0.000568884	0.0020555	0.00460487	1.30916	0.388637
ALDH2	P05091	sp|P05091|ALDH2_HUMAN Aldehyde dehydrogenase, mitochondrial OS=Homo sapiens OX=9606 GN=ALDH2 PE=1 SV=2	20	0.000640689	0.000803807	0.0161966	0.0183278	0.797068	-0.327225
RPL27	P61353	sp|P61353|RL27_HUMAN 60S ribosomal protein L27 OS=Homo sapiens OX=9606 GN=RPL27 PE=1 SV=2	4	0.000729389	0.000507904	2.86162e-05	0.000480649	1.43608	0.522134
TOMM6	Q96B49	sp|Q96B49|TOM6_HUMAN Mitochondrial import receptor subunit TOM6 homolog OS=Homo sapiens OX=9606 GN=TOMM6 PE=1 SV=1	2	0.000676174	0.00104049	0.000507851	0.00209644	0.649859	-0.621801
ACO2	Q99798	sp|Q99798|ACON_HUMAN Aconitate hydratase, mitochondrial OS=Homo sapiens OX=9606 GN=ACO2 PE=1 SV=2	30	0.000565143	0.000718342	0.000224207	0.00136792	0.786733	-0.346055
XRCC6	P12956	sp|P12956|XRCC6_HUMAN X-ray repair cross-complementing protein 6 OS=Homo sapiens OX=9606 GN=XRCC6 PE=1 SV=2	29	0.000665213	0.000521364	0.000443865	0.00194876	1.27591	0.351527
COX5A	P20674	sp|P20674|COX5A_HUMAN Cytochrome c oxidase subunit 5A, mitochondrial OS=Homo sapiens OX=9606 GN=COX5A PE=1 SV=2	7	0.000911585	0.000505801	0.0311217	0.028585	1.80226	0.849807
VAPA	Q9P0L0	sp|Q9P0L0|VAPA_HUMAN Vesicle-associated membrane protein-associated protein A OS=Homo sapiens OX=9606 GN=VAPA PE=1 SV=3	11	0.000423629	0.0006817	0.00593627	0.0092194	0.621431	-0.686335
S100A16	Q96FQ6	sp|Q96FQ6|S10AG_HUMAN Protein S100-A16 OS=Homo sapiens OX=9606 GN=S100A16 PE=1 SV=1	5	0.000475169	0.000800578	0.0364079	0.0319511	0.593533	-0.752601
TPD52L2	O43399	sp|O43399|TPD54_HUMAN Tumor protein D54 OS=Homo sapiens OX=9606 GN=TPD52L2 PE=1 SV=2	11	0.00060467	0.000503013	0.0378744	0.0329026	1.2021	0.265551
COA3	Q9Y2R0	sp|Q9Y2R0|COA3_HUMAN Cytochrome c oxidase assembly factor 3 homolog, mitochondrial OS=Homo sapiens OX=9606 GN=COA3 PE=1 SV=1	5	0.000462149	0.000727514	0.040564	0.0345987	0.635244	-0.654618
RPS13	P62277	sp|P62277|RS13_HUMAN 40S ribosomal protein S13 OS=Homo sapiens OX=9606 GN=RPS13 PE=1 SV=2	8	0.000746752	0.000481641	0.000957719	0.00302671	1.55043	0.63267
CDH17	Q12864	sp|Q12864|CAD17_HUMAN Cadherin-17 OS=Homo sapiens OX=9606 GN=CDH17 PE=2 SV=3	28	0.00049472	0.000648025	0.000133269	0.00100695	0.763428	-0.389437
HNRNPH3	P31942	sp|P31942|HNRH3_HUMAN Heterogeneous nuclear ribonucleoprotein H3 OS=Homo sapiens OX=9606 GN=HNRNPH3 PE=1 SV=2	8	0.000635714	0.000471401	0.00119296	0.00340949	1.34856	0.431422
RPL27A	P46776	sp|P46776|RL27A_HUMAN 60S ribosomal protein L27a OS=Homo sapiens OX=9606 GN=RPL27A PE=1 SV=2	3	0.000760647	0.000553725	0.000185781	0.00123215	1.37369	0.458057
EPCAM	P16422	sp|P16422|EPCAM_HUMAN Epithelial cell adhesion molecule OS=Homo sapiens OX=9606 GN=EPCAM PE=1 SV=2	9	0.000360345	0.000743447	0.00116377	0.00336549	0.484694	-1.04485
ERP29	P30040	sp|P30040|ERP29_HUMAN Endoplasmic reticulum resident protein 29 OS=Homo sapiens OX=9606 GN=ERP29 PE=1 SV=4	11	0.0004407	0.000648576	0.00112594	0.00330687	0.679488	-0.557479
SOD2	P04179	sp|P04179|SODM_HUMAN Superoxide dismutase [Mn], mitochondrial OS=Homo sapiens OX=9606 GN=SOD2 PE=1 SV=3	7	0.000563464	0.000681582	0.00464937	0.00785782	0.8267	-0.274564
RAB1B	Q9H0U4	sp|Q9H0U4|RAB1B_HUMAN Ras-related protein Rab-1B OS=Homo sapiens OX=9606 GN=RAB1B PE=1 SV=1	3	0.000644156	0.000442822	0.00112813	0.00331032	1.45466	0.540685
CDHR5	Q9HBB8	sp|Q9HBB8|CDHR5_HUMAN Cadherin-related family member 5 OS=Homo sapiens OX=9606 GN=CDHR5 PE=1 SV=3	12	0.000465877	0.000631851	0.000647973	0.00241616	0.737321	-0.439636
GPRC5A	Q8NFJ5	sp|Q8NFJ5|RAI3_HUMAN Retinoic acid-induced protein 3 OS=Homo sapiens OX=9606 GN=GPRC5A PE=1 SV=2	4	0.00066936	0.000504301	0.00489662	0.00811969	1.3273	0.408499
STT3A	P46977	sp|P46977|STT3A_HUMAN Dolichyl-diphosphooligosaccharide--protein glycosyltransferase subunit STT3A OS=Homo sapiens OX=9606 GN=STT3A PE=1 SV=2	17	0.000450976	0.000576976	0.00517397	0.00840192	0.78162	-0.355461
DLST	P36957	sp|P36957|ODO2_HUMAN Dihydrolipoyllysine-residue succinyltransferase component of 2-oxoglutarate dehydrogenase complex, mitochondrial OS=Homo sapiens OX=9606 GN=DLST PE=1 SV=4	14	0.000489066	0.000603458	0.00142602	0.00372707	0.810439	-0.303225
ECH1	Q13011	sp|Q13011|ECH1_HUMAN Delta(3,5)-Delta(2,4)-dienoyl-CoA isomerase, mitochondrial OS=Homo sapiens OX=9606 GN=ECH1 PE=1 SV=2	11	0.000474174	0.000643678	0.000256119	0.00146518	0.736664	-0.440922
FH	P07954	sp|P07954|FUMH_HUMAN Fumarate hydratase, mitochondrial OS=Homo sapiens OX=9606 GN=FH PE=1 SV=3	17	0.000449535	0.00070702	0.000271924	0.00150899	0.635817	-0.653317
CYCS	P99999	sp|P99999|CYC_HUMAN Cytochrome c OS=Homo sapiens OX=9606 GN=CYCS PE=1 SV=2	5	0.000576435	0.000403073	0.000648895	0.0024183	1.4301	0.516118
ROMO1	P60602	sp|P60602|ROMO1_HUMAN Reactive oxygen species modulator 1 OS=Homo sapiens OX=9606 GN=ROMO1 PE=1 SV=1	2	0.000442214	0.000631901	0.00394835	0.0070575	0.699814	-0.514956
NDUFA4	O00483	sp|O00483|NDUA4_HUMAN Cytochrome c oxidase subunit NDUFA4 OS=Homo sapiens OX=9606 GN=NDUFA4 PE=1 SV=1	4	0.000437001	0.000648207	0.0155068	0.0178609	0.674169	-0.568818
RPL30	P62888	sp|P62888|RL30_HUMAN 60S ribosomal protein L30 OS=Homo sapiens OX=9606 GN=RPL30 PE=1 SV=2	5	0.000440872	0.000553857	0.00570597	0.00897893	0.796002	-0.329155
EIF6	P56537	sp|P56537|IF6_HUMAN Eukaryotic translation initiation factor 6 OS=Homo sapiens OX=9606 GN=EIF6 PE=1 SV=1	5	0.000574731	0.000386337	0.0159729	0.0181782	1.48764	0.573026
SRSF3	P84103	sp|P84103|SRSF3_HUMAN Serine/arginine-rich splicing factor 3 OS=Homo sapiens OX=9606 GN=SRSF3 PE=1 SV=1	7	0.000419005	0.000586172	0.00579814	0.00907593	0.714815	-0.484359
ILF2	Q12905	sp|Q12905|ILF2_HUMAN Interleukin enhancer-binding factor 2 OS=Homo sapiens OX=9606 GN=ILF2 PE=1 SV=2	13	0.000565098	0.000356434	0.000234797	0.0014016	1.58542	0.664866
C1QBP	Q07021	sp|Q07021|C1QBP_HUMAN Complement component 1 Q subcomponent-binding protein, mitochondrial OS=Homo sapiens OX=9606 GN=C1QBP PE=1 SV=1	8	0.000575273	0.000428873	0.000178164	0.00120238	1.34136	0.423697
TMED2	Q15363	sp|Q15363|TMED2_HUMAN Transmembrane emp24 domain-containing protein 2 OS=Homo sapiens OX=9606 GN=TMED2 PE=1 SV=1	8	0.000299555	0.000444365	0.0102732	0.0136889	0.674119	-0.568925
ANXA3	P12429	sp|P12429|ANXA3_HUMAN Annexin A3 OS=Homo sapiens OX=9606 GN=ANXA3 PE=1 SV=3	14	0.000488579	0.000392406	0.00124232	0.00348161	1.24509	0.316247
XRCC5	P13010	sp|P13010|XRCC5_HUMAN X-ray repair cross-complementing protein 5 OS=Homo sapiens OX=9606 GN=XRCC5 PE=1 SV=3	24	0.000560703	0.000377228	0.00240454	0.00508437	1.48638	0.571801
UQCRH	P07919	sp|P07919|QCR6_HUMAN Cytochrome b-c1 complex subunit 6, mitochondrial OS=Homo sapiens OX=9606 GN=UQCRH PE=1 SV=2	4	0.000390955	0.000628237	0.00155641	0.00391176	0.622304	-0.684307
HMGB3	O15347	sp|O15347|HMGB3_HUMAN High mobility group protein B3 OS=Homo sapiens OX=9606 GN=HMGB3 PE=1 SV=4	4	0.000516436	0.000423899	0.000443404	0.00194763	1.2183	0.284869
HACD3	Q9P035	sp|Q9P035|HACD3_HUMAN Very-long-chain (3R)-3-hydroxyacyl-CoA dehydratase 3 OS=Homo sapiens OX=9606 GN=HACD3 PE=1 SV=2	7	0.000528438	0.000403255	0.00296286	0.00583135	1.31043	0.390043
SCP2	P22307	sp|P22307|NLTP_HUMAN Non-specific lipid-transfer protein OS=Homo sapiens OX=9606 GN=SCP2 PE=1 SV=2	20	0.00033449	0.000550851	0.00225073	0.0048705	0.607223	-0.719701
F11R	Q9Y624	sp|Q9Y624|JAM1_HUMAN Junctional adhesion molecule A OS=Homo sapiens OX=9606 GN=F11R PE=1 SV=1	12	0.000378196	0.000592347	0.00733446	0.0107322	0.638471	-0.647307
B2M	P61769	sp|P61769|B2MG_HUMAN Beta-2-microglobulin OS=Homo sapiens OX=9606 GN=B2M PE=1 SV=1	3	0.00012922	0.000671542	4.52458e-05	0.000559245	0.192423	-2.37765
VDAC3	Q9Y277	sp|Q9Y277|VDAC3_HUMAN Voltage-dependent anion-selective channel protein 3 OS=Homo sapiens OX=9606 GN=VDAC3 PE=1 SV=1	10	0.000502543	0.000417651	0.00930773	0.0127721	1.20326	0.266949
RPS12	P25398	sp|P25398|RS12_HUMAN 40S ribosomal protein S12 OS=Homo sapiens OX=9606 GN=RPS12 PE=1 SV=3	4	0.000465685	0.000275882	0.000270445	0.001505	1.68799	0.755302
RBMX	P38159	sp|P38159|RBMX_HUMAN RNA-binding motif protein, X chromosome OS=Homo sapiens OX=9606 GN=RBMX PE=1 SV=3;sp|Q96E39|RMXL1_HUMAN RNA binding motif protein, X-linked-like-1 OS=Homo sapiens OX=9606 GN=RBMXL1 PE=1 SV=1	17	0.000366068	0.000485465	0.00135295	0.0036335	0.754056	-0.407256
NOP56	O00567	sp|O00567|NOP56_HUMAN Nucleolar protein 56 OS=Homo sapiens OX=9606 GN=NOP56 PE=1 SV=4	22	0.000524713	0.000392174	0.00104403	0.00317347	1.33796	0.420033
GANAB	Q14697	sp|Q14697|GANAB_HUMAN Neutral alpha-glucosidase AB OS=Homo sapiens OX=9606 GN=GANAB PE=1 SV=3	35	0.00034707	0.000496878	0.000275554	0.00151868	0.698502	-0.517664
NOP58	Q9Y2X3	sp|Q9Y2X3|NOP58_HUMAN Nucleolar protein 58 OS=Homo sapiens OX=9606 GN=NOP58 PE=1 SV=1	19	0.000486434	0.000389293	0.00110909	0.00328017	1.24953	0.321388
CHMP4B	Q9H444	sp|Q9H444|CHM4B_HUMAN Charged multivesicular body protein 4b OS=Homo sapiens OX=9606 GN=CHMP4B PE=1 SV=1	6	0.000269535	0.000529623	0.0198383	0.020642	0.508919	-0.974493
REEP5	Q00765	sp|Q00765|REEP5_HUMAN Receptor expression-enhancing protein 5 OS=Homo sapiens OX=9606 GN=REEP5 PE=1 SV=3	4	0.000386737	0.000536167	0.00241013	0.00509197	0.721299	-0.471331
RRBP1	Q9P2E9	sp|Q9P2E9|RRBP1_HUMAN Ribosome-binding protein 1 OS=Homo sapiens OX=9606 GN=RRBP1 PE=1 SV=5	44	0.000276525	0.000543485	9.1879e-06	0.000292569	0.508799	-0.974832
DDX21	Q9NR30	sp|Q9NR30|DDX21_HUMAN Nucleolar RNA helicase 2 OS=Homo sapiens OX=9606 GN=DDX21 PE=1 SV=5	28	0.000460906	0.000374882	0.00899775	0.012466	1.22947	0.298035
UQCR10	Q9UDW1	sp|Q9UDW1|QCR9_HUMAN Cytochrome b-c1 complex subunit 9 OS=Homo sapiens OX=9606 GN=UQCR10 PE=1 SV=3	2	0.000452735	0.000290617	4.25797e-06	0.000207579	1.55784	0.639546
RPL17	P18621	sp|P18621|RL17_HUMAN 60S ribosomal protein L17 OS=Homo sapiens OX=9606 GN=RPL17 PE=1 SV=3	5	0.000288084	0.000519178	7.43081e-05	0.000695679	0.554885	-0.849739
IDH1	O75874	sp|O75874|IDHC_HUMAN Isocitrate dehydrogenase [NADP] cytoplasmic OS=Homo sapiens OX=9606 GN=IDH1 PE=1 SV=2	17	0.000308929	0.000392539	0.00299438	0.00587329	0.787003	-0.345558
IGF2BP1	Q9NZI8	sp|Q9NZI8|IF2B1_HUMAN Insulin-like growth factor 2 mRNA-binding protein 1 OS=Homo sapiens OX=9606 GN=IGF2BP1 PE=1 SV=2	20	0.000503514	0.000373377	0.000275809	0.00151936	1.34854	0.431398
TMEM14C	Q9P0S9	sp|Q9P0S9|TM14C_HUMAN Transmembrane protein 14C OS=Homo sapiens OX=9606 GN=TMEM14C PE=1 SV=1	3	0.000439343	0.000181835	0.00388559	0.00698149	2.41616	1.27272
SLC3A2	P08195	sp|P08195|4F2_HUMAN 4F2 cell-surface antigen heavy chain OS=Homo sapiens OX=9606 GN=SLC3A2 PE=1 SV=3	17	0.000443083	0.000347297	0.000869907	0.00287338	1.27581	0.351409
APOA4	P06727	sp|P06727|APOA4_HUMAN Apolipoprotein A-IV OS=Homo sapiens OX=9606 GN=APOA4 PE=1 SV=3	17	3.50812e-05	0.00067582	3.69256e-06	0.0001934	0.0519091	-4.26787
SEC61A1	P61619	sp|P61619|S61A1_HUMAN Protein transport protein Sec61 subunit alpha isoform 1 OS=Homo sapiens OX=9606 GN=SEC61A1 PE=1 SV=2;sp|Q9H9S3|S61A2_HUMAN Protein transport protein Sec61 subunit alpha isoform 2 OS=Homo sapiens OX=9606 GN=SEC61A2 PE=2 SV=3	9	0.000342379	0.000431145	0.0195436	0.0204676	0.794115	-0.332581
RPL24	P83731	sp|P83731|RL24_HUMAN 60S ribosomal protein L24 OS=Homo sapiens OX=9606 GN=RPL24 PE=1 SV=1	7	0.000451186	0.000241957	0.00499077	0.00821683	1.86474	0.898971
AIFM1	O95831	sp|O95831|AIFM1_HUMAN Apoptosis-inducing factor 1, mitochondrial OS=Homo sapiens OX=9606 GN=AIFM1 PE=1 SV=1	18	0.000358276	0.000457621	0.00152176	0.00386049	0.782909	-0.353083
TSPAN8	P19075	sp|P19075|TSN8_HUMAN Tetraspanin-8 OS=Homo sapiens OX=9606 GN=TSPAN8 PE=1 SV=1	1	0.000320952	0.000488396	0.00452513	0.0077224	0.657155	-0.605694
RPS28	P62857	sp|P62857|RS28_HUMAN 40S ribosomal protein S28 OS=Homo sapiens OX=9606 GN=RPS28 PE=1 SV=1	3	0.00045283	0.000282738	0.00381783	0.00690101	1.60159	0.679503
ETHE1	O95571	sp|O95571|ETHE1_HUMAN Persulfide dioxygenase ETHE1, mitochondrial OS=Homo sapiens OX=9606 GN=ETHE1 PE=1 SV=2	9	0.000344648	0.000477471	0.000526997	0.00213726	0.721819	-0.470291
SIGMAR1	Q99720	sp|Q99720|SGMR1_HUMAN Sigma non-opioid intracellular receptor 1 OS=Homo sapiens OX=9606 GN=SIGMAR1 PE=1 SV=1	3	0.000438063	0.000337312	0.0187202	0.0199681	1.29869	0.377052
MATR3	P43243	sp|P43243|MATR3_HUMAN Matrin-3 OS=Homo sapiens OX=9606 GN=MATR3 PE=1 SV=2	28	0.00039579	0.000279849	0.000537515	0.00215908	1.4143	0.500087
HMGN1	P05114	sp|P05114|HMGN1_HUMAN Non-histone chromosomal protein HMG-14 OS=Homo sapiens OX=9606 GN=HMGN1 PE=1 SV=3	7	0.00025559	0.000496292	0.00566348	0.00893388	0.514999	-0.957358
SRP14	P37108	sp|P37108|SRP14_HUMAN Signal recognition particle 14 kDa protein OS=Homo sapiens OX=9606 GN=SRP14 PE=1 SV=2	6	0.000141694	0.000555145	0.000133986	0.00101043	0.255237	-1.97009
KHDRBS1	Q07666	sp|Q07666|KHDR1_HUMAN KH domain-containing, RNA-binding, signal transduction-associated protein 1 OS=Homo sapiens OX=9606 GN=KHDRBS1 PE=1 SV=1	5	0.000534376	0.000267333	0.00673585	0.0100738	1.99891	0.999217
SEC61B	P60468	sp|P60468|SC61B_HUMAN Protein transport protein Sec61 subunit beta OS=Homo sapiens OX=9606 GN=SEC61B PE=1 SV=2	3	0.000318844	0.000390737	0.00309869	0.00601008	0.816008	-0.293344
TUBB	P07437	sp|P07437|TBB5_HUMAN Tubulin beta chain OS=Homo sapiens OX=9606 GN=TUBB PE=1 SV=2	3	0.000377975	0.000304631	0.00157129	0.00393349	1.24076	0.311229
PSAP	P07602	sp|P07602|SAP_HUMAN Prosaposin OS=Homo sapiens OX=9606 GN=PSAP PE=1 SV=2	14	0.00015653	0.000502022	8.07328e-06	0.000275763	0.311799	-1.68131
ALDH6A1	Q02252	sp|Q02252|MMSA_HUMAN Methylmalonate-semialdehyde dehydrogenase [acylating], mitochondrial OS=Homo sapiens OX=9606 GN=ALDH6A1 PE=1 SV=2	17	0.000303652	0.00040849	0.0197044	0.020563	0.743352	-0.427882
RPS2	P15880	sp|P15880|RS2_HUMAN 40S ribosomal protein S2 OS=Homo sapiens OX=9606 GN=RPS2 PE=1 SV=2	7	0.000357302	0.00025434	0.016028	0.0182152	1.40482	0.490385
SYNGR2	O43760	sp|O43760|SNG2_HUMAN Synaptogyrin-2 OS=Homo sapiens OX=9606 GN=SYNGR2 PE=1 SV=1	3	0.000306275	0.000375404	0.00108335	0.00323865	0.815856	-0.293613
CDH1	P12830	sp|P12830|CADH1_HUMAN Cadherin-1 OS=Homo sapiens OX=9606 GN=CDH1 PE=1 SV=3	16	0.000268538	0.000386487	6.21922e-05	0.000627023	0.694819	-0.525291
SLC19A3	Q9BZV2	sp|Q9BZV2|S19A3_HUMAN Thiamine transporter 2 OS=Homo sapiens OX=9606 GN=SLC19A3 PE=1 SV=1	2	0.000374711	0.000308812	0.0102975	0.0137114	1.21339	0.279049
CD59	P13987	sp|P13987|CD59_HUMAN CD59 glycoprotein OS=Homo sapiens OX=9606 GN=CD59 PE=1 SV=1	3	0.000246648	0.000392686	0.03048	0.028171	0.628104	-0.670926
SLC25A24	Q6NUK1	sp|Q6NUK1|SCMC1_HUMAN Calcium-binding mitochondrial carrier protein SCaMC-1 OS=Homo sapiens OX=9606 GN=SLC25A24 PE=1 SV=2	19	0.000306659	0.000372607	0.0164051	0.0184658	0.823008	-0.281021
ERP44	Q9BS26	sp|Q9BS26|ERP44_HUMAN Endoplasmic reticulum resident protein 44 OS=Homo sapiens OX=9606 GN=ERP44 PE=1 SV=1	11	0.000241694	0.000382073	5.28405e-06	0.000228857	0.632588	-0.660662
NDUFS1	P28331	sp|P28331|NDUS1_HUMAN NADH-ubiquinone oxidoreductase 75 kDa subunit, mitochondrial OS=Homo sapiens OX=9606 GN=NDUFS1 PE=1 SV=3	27	0.000301394	0.000365296	0.0037235	0.00678737	0.825069	-0.277412
P4HA1	P13674	sp|P13674|P4HA1_HUMAN Prolyl 4-hydroxylase subunit alpha-1 OS=Homo sapiens OX=9606 GN=P4HA1 PE=1 SV=2	15	0.000176668	0.000460953	5.67979e-05	0.000607973	0.383266	-1.38358
RPL34	P49207	sp|P49207|RL34_HUMAN 60S ribosomal protein L34 OS=Homo sapiens OX=9606 GN=RPL34 PE=1 SV=3	5	0.000262112	0.000442567	0.00135283	0.00363334	0.592253	-0.755713
REEP6	Q96HR9	sp|Q96HR9|REEP6_HUMAN Receptor expression-enhancing protein 6 OS=Homo sapiens OX=9606 GN=REEP6 PE=1 SV=2	4	0.000449706	0.0001766	6.54182e-05	0.000646051	2.54646	1.34849
AK4	P27144	sp|P27144|KAD4_HUMAN Adenylate kinase 4, mitochondrial OS=Homo sapiens OX=9606 GN=AK4 PE=1 SV=1	11	0.000288365	0.00035306	0.00589053	0.00917215	0.816757	-0.292021
RSL1D1	O76021	sp|O76021|RL1D1_HUMAN Ribosomal L1 domain-containing protein 1 OS=Homo sapiens OX=9606 GN=RSL1D1 PE=1 SV=3	15	0.000412962	0.000239493	0.00219742	0.00479977	1.72432	0.786029
DBI	P07108	sp|P07108|ACBP_HUMAN Acyl-CoA-binding protein OS=Homo sapiens OX=9606 GN=DBI PE=1 SV=2	4	0.000225664	0.000299708	0.000720131	0.00257723	0.752946	-0.409381
TECR	Q9NZ01	sp|Q9NZ01|TECR_HUMAN Very-long-chain enoyl-CoA reductase OS=Homo sapiens OX=9606 GN=TECR PE=1 SV=1	9	0.000220241	0.000292033	5.1778e-05	0.000588006	0.754164	-0.40705
APMAP	Q9HDC9	sp|Q9HDC9|APMAP_HUMAN Adipocyte plasma membrane-associated protein OS=Homo sapiens OX=9606 GN=APMAP PE=1 SV=2	13	0.000255067	0.000207377	5.9073e-05	0.000616287	1.22997	0.298619
CYP27A1	Q02318	sp|Q02318|CP27A_HUMAN Sterol 26-hydroxylase, mitochondrial OS=Homo sapiens OX=9606 GN=CYP27A1 PE=1 SV=1	16	0.000231512	0.00039576	0.0065897	0.00991339	0.584981	-0.77354
CLTA	P09496	sp|P09496|CLCA_HUMAN Clathrin light chain A OS=Homo sapiens OX=9606 GN=CLTA PE=1 SV=1	2	0.000270486	0.000391132	0.0013925	0.00368477	0.691548	-0.5321
TIMM8A	O60220	sp|O60220|TIM8A_HUMAN Mitochondrial import inner membrane translocase subunit Tim8 A OS=Homo sapiens OX=9606 GN=TIMM8A PE=1 SV=1	3	0.000442039	0.000303765	0.019879	0.0206659	1.4552	0.541219
VTN	P04004	sp|P04004|VTNC_HUMAN Vitronectin OS=Homo sapiens OX=9606 GN=VTN PE=1 SV=1	9	0.00021251	0.000291304	0.000410181	0.00186321	0.729512	-0.454997
SLC37A4	O43826	sp|O43826|G6PT1_HUMAN Glucose-6-phosphate exchanger SLC37A4 OS=Homo sapiens OX=9606 GN=SLC37A4 PE=1 SV=1	6	0.000267083	0.000384116	0.000981443	0.00306588	0.69532	-0.524252
HIST2H2AB	Q8IUE6	sp|Q8IUE6|H2A2B_HUMAN Histone H2A type 2-B OS=Homo sapiens OX=9606 GN=HIST2H2AB PE=1 SV=3	1	0.000256583	0.000132242	0.0109873	0.0143337	1.94026	0.956249
HNRNPR	O43390	sp|O43390|HNRPR_HUMAN Heterogeneous nuclear ribonucleoprotein R OS=Homo sapiens OX=9606 GN=HNRNPR PE=1 SV=1	11	0.000327661	0.000261676	0.00353839	0.00656182	1.25216	0.324424
SCCPDH	Q8NBX0	sp|Q8NBX0|SCPDL_HUMAN Saccharopine dehydrogenase-like oxidoreductase OS=Homo sapiens OX=9606 GN=SCCPDH PE=1 SV=1	11	0.000335874	0.000238415	0.0105336	0.0139272	1.40878	0.494445
NDUFV2	P19404	sp|P19404|NDUV2_HUMAN NADH dehydrogenase [ubiquinone] flavoprotein 2, mitochondrial OS=Homo sapiens OX=9606 GN=NDUFV2 PE=1 SV=2	9	0.000240598	0.000321445	0.00247614	0.00518071	0.748488	-0.417949
RPS15	P62841	sp|P62841|RS15_HUMAN 40S ribosomal protein S15 OS=Homo sapiens OX=9606 GN=RPS15 PE=1 SV=2	4	0.000315013	0.000228853	0.00121213	0.00343783	1.37649	0.460991
SURF4	O15260	sp|O15260|SURF4_HUMAN Surfeit locus protein 4 OS=Homo sapiens OX=9606 GN=SURF4 PE=1 SV=3	6	0.000397965	0.000175324	0.00043622	0.00192985	2.26989	1.18262
CD9	P21926	sp|P21926|CD9_HUMAN CD9 antigen OS=Homo sapiens OX=9606 GN=CD9 PE=1 SV=4	3	0.00021444	0.000372294	0.000780098	0.00270154	0.575998	-0.795865
ACADM	P11310	sp|P11310|ACADM_HUMAN Medium-chain specific acyl-CoA dehydrogenase, mitochondrial OS=Homo sapiens OX=9606 GN=ACADM PE=1 SV=1	13	0.00025843	0.000361777	0.00333782	0.00631627	0.714335	-0.485328
U2AF2	P26368	sp|P26368|U2AF2_HUMAN Splicing factor U2AF 65 kDa subunit OS=Homo sapiens OX=9606 GN=U2AF2 PE=1 SV=4	10	0.000315572	0.000239795	0.00513567	0.00836365	1.31601	0.396166
H1FX	Q92522	sp|Q92522|H1X_HUMAN Histone H1x OS=Homo sapiens OX=9606 GN=H1FX PE=1 SV=1	8	0.000192466	0.000354488	0.00168893	0.00409938	0.54294	-0.881136
MARCKSL1	P49006	sp|P49006|MRP_HUMAN MARCKS-related protein OS=Homo sapiens OX=9606 GN=MARCKSL1 PE=1 SV=2	2	0.000228809	0.000346395	0.000831198	0.0028013	0.660543	-0.598277
NDUFAB1	O14561	sp|O14561|ACPM_HUMAN Acyl carrier protein, mitochondrial OS=Homo sapiens OX=9606 GN=NDUFAB1 PE=1 SV=3	4	0.000328541	0.000249046	0.00615075	0.00944781	1.3192	0.399662
PRDX2	P32119	sp|P32119|PRDX2_HUMAN Peroxiredoxin-2 OS=Homo sapiens OX=9606 GN=PRDX2 PE=1 SV=5	4	0.000295312	0.000218545	0.000555468	0.00219537	1.35126	0.434305
AGMAT	Q9BSE5	sp|Q9BSE5|SPEB_HUMAN Agmatinase, mitochondrial OS=Homo sapiens OX=9606 GN=AGMAT PE=1 SV=2	8	0.000237329	0.00032566	3.58553e-05	0.000517088	0.728764	-0.456477
[truncated: 849 more rows]
