# Supplementary material for: A proteomic study on the protective effect of kaempferol pretreatment against deoxynivalenol-induced intestinal barrier dysfunction in a Caco-2 cell model
Source: Royal Society of Chemistry journal article supplement (doi:10.1039/d0fo01579b), 2020-01-01
Supplement: d0fo01579b2.pdf [file d0fo01579b2.pdf]

**Electronic supplementary information :**

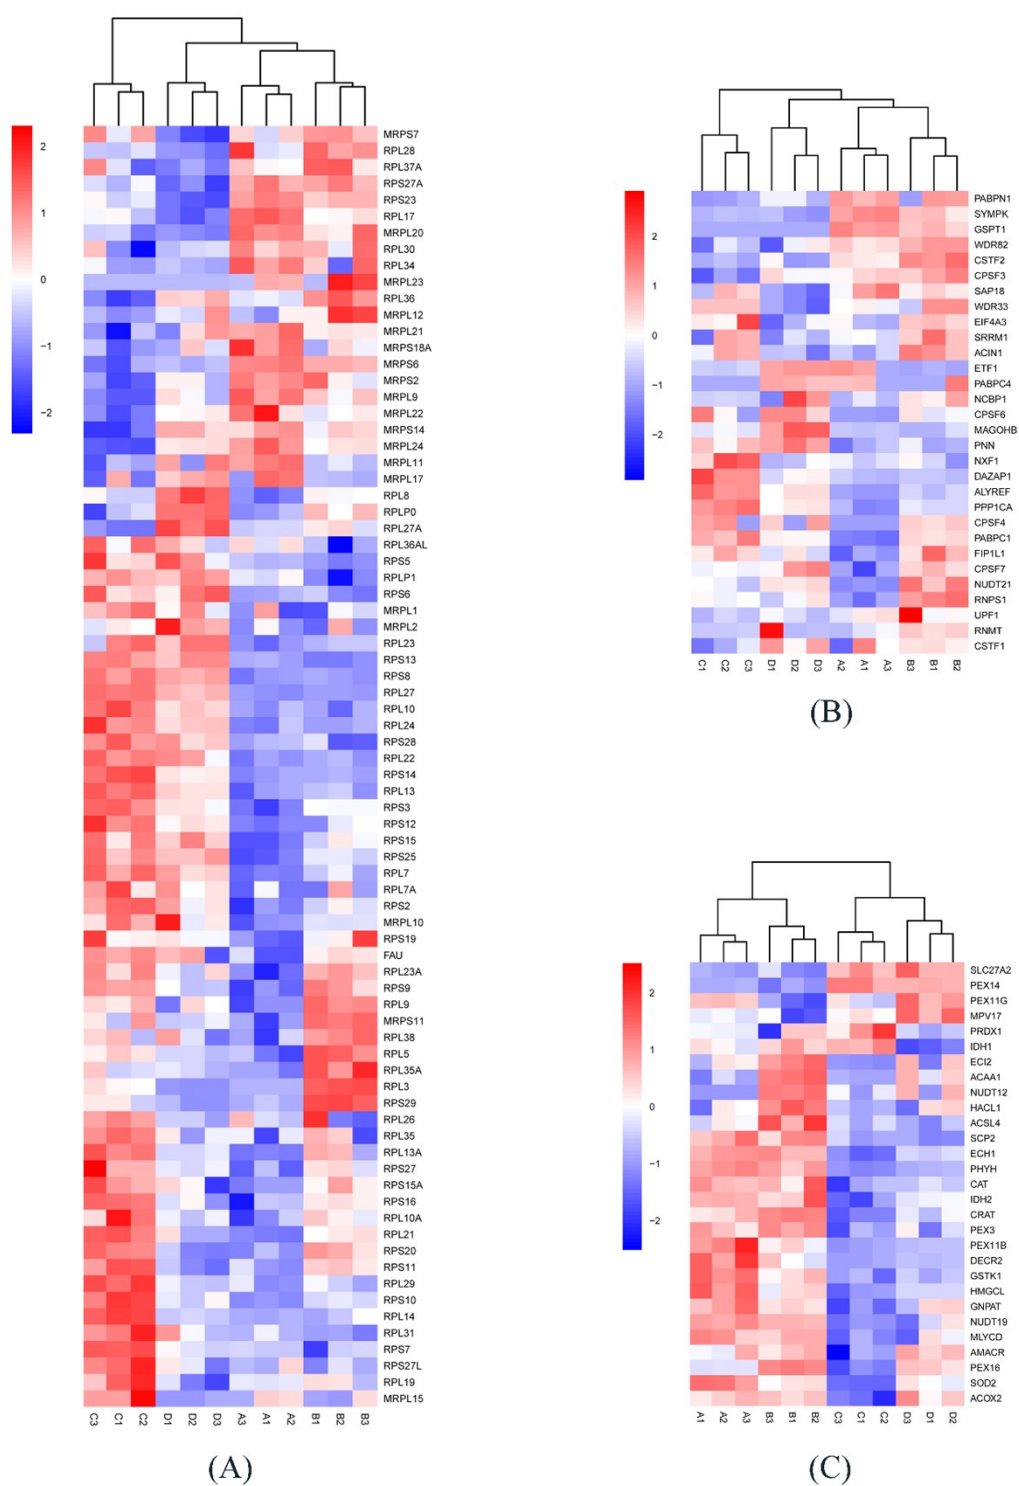

Figure S1 Hierarchical cluster analysis of differentially expressed proteins related to ribosome (A), mRNA surveillance (B), and peroxisome (C). In the figure, the abscissa represents different experimental groups (A1, A2, and A3: Control; B1, B2, and B3:

KAM; C1, C2, and C3: DON; D1, D2, and D3: KAM + DON), each group has three repetitions, and the ordinate represents the differentially expressed protein. The color blocks at different positions represent the relative expression level of protein at the corresponding position, red represents high expression, and blue represents low expression.
